# Supplementary material for: A high-throughput platform for single-molecule tracking identifies drug interaction and cellular mechanisms
Source: eLife. 2025 Jan 9;12:RP93183. doi: 10.7554/eLife.93183 (PMC11717362; doi:10.7554/eLife.93183)
Supplement: Figure 1—source data 1. [file elife-93183-fig1-data1.xlsx]

## Sheet: Figure1
Diffusion Coefficient	Mix			CaaX			H2B			Free Halo
0.01	0.167066	0.076326	17	0.032543	0.018139	20	0.305239	0.069795	23	0.054851	0.049719	24
0.010975	0.061322	0.026646	17	0.008375	0.002812	20	0.118772	0.026702	23	0.021631	0.011818	24
0.012045	0.034214	0.014411	17	0.005639	0.001685	20	0.059445	0.016134	23	0.015195	0.006849	24
0.013219	0.02329	0.009806	17	0.004599	0.001283	20	0.035694	0.010902	23	0.01224	0.005058	24
0.014508	0.0177	0.007577	17	0.004003	0.001066	20	0.024546	0.007772	23	0.010411	0.004087	24
0.015923	0.014374	0.006256	17	0.003601	0.000926	20	0.018615	0.005838	23	0.009105	0.003439	24
0.017475	0.012183	0.005362	17	0.003309	0.000828	20	0.015122	0.004619	23	0.00811	0.002969	24
0.019179	0.010619	0.004691	17	0.003087	0.000757	20	0.012884	0.003824	23	0.007323	0.002616	24
0.021049	0.009447	0.004171	17	0.002916	0.000705	20	0.011353	0.003276	23	0.006683	0.002344	24
0.023101	0.008528	0.003742	17	0.002784	0.000668	20	0.01025	0.002881	23	0.006153	0.002133	24
0.025354	0.007789	0.003389	17	0.002683	0.000643	20	0.009427	0.002582	23	0.00571	0.001971	24
0.027826	0.007178	0.003085	17	0.002607	0.000629	20	0.008801	0.002349	23	0.005338	0.001849	24
0.030539	0.006668	0.002824	17	0.002555	0.000624	20	0.008317	0.002164	23	0.005024	0.001767	24
0.033516	0.006233	0.002598	17	0.002522	0.000626	20	0.007946	0.002022	23	0.00476	0.001721	24
0.036784	0.005865	0.002403	17	0.00251	0.000638	20	0.007663	0.001919	23	0.004538	0.001715	24
0.04037	0.005551	0.002236	17	0.002516	0.00066	20	0.007459	0.001859	23	0.004353	0.001747	24
0.044306	0.005287	0.002096	17	0.002542	0.000692	20	0.007324	0.00185	23	0.004202	0.001819	24
0.048626	0.005069	0.001987	17	0.002588	0.000735	20	0.007258	0.001907	23	0.00408	0.00193	24
0.053367	0.004895	0.001916	17	0.002656	0.000794	20	0.007257	0.00205	23	0.003984	0.002079	24
0.05857	0.004765	0.001899	17	0.00275	0.000871	20	0.007322	0.002304	23	0.003911	0.002257	24
0.064281	0.004662	0.001928	17	0.002871	0.00097	20	0.007455	0.002676	23	0.003856	0.00244	24
0.070548	0.004548	0.001917	17	0.003032	0.001115	20	0.007692	0.003229	23	0.003816	0.002624	24
0.077426	0.004404	0.001816	17	0.003244	0.00133	20	0.008122	0.004257	23	0.003781	0.002759	24
0.084975	0.004262	0.0017	17	0.003492	0.001575	20	0.00878	0.006089	23	0.003745	0.002827	24
0.09326	0.004147	0.001607	17	0.003682	0.001582	20	0.00944	0.008047	23	0.003708	0.002833	24
0.102353	0.004058	0.001532	17	0.003803	0.00143	20	0.009786	0.009041	23	0.003675	0.002798	24
0.112332	0.003995	0.001482	17	0.003947	0.001428	20	0.009756	0.009101	23	0.003653	0.002744	24
0.123285	0.003967	0.001493	17	0.004174	0.001665	20	0.009456	0.008332	23	0.003647	0.002692	24
0.135305	0.003999	0.001681	17	0.004547	0.002291	20	0.009095	0.007248	23	0.003662	0.002662	24
0.148497	0.004121	0.002227	17	0.004956	0.002997	20	0.008858	0.006973	23	0.003697	0.002666	24
0.162975	0.004272	0.002941	17	0.005136	0.003105	20	0.008704	0.00708	23	0.003751	0.002716	24
0.178865	0.004279	0.003084	17	0.005225	0.002859	20	0.008456	0.00707	23	0.003814	0.002807	24
0.196304	0.004103	0.002462	17	0.005347	0.00251	20	0.008019	0.006621	23	0.003869	0.002916	24
0.215443	0.003925	0.001791	17	0.005544	0.002296	20	0.007625	0.006203	23	0.003905	0.003017	24
0.236449	0.003859	0.001483	17	0.005797	0.002227	20	0.007432	0.006235	23	0.003917	0.003086	24
0.259502	0.003882	0.001414	17	0.006048	0.00216	20	0.00735	0.00664	23	0.003909	0.003117	24
0.284804	0.003951	0.001447	17	0.006269	0.002046	20	0.007206	0.007041	23	0.003883	0.003111	24
0.312572	0.00405	0.001532	17	0.006493	0.002025	20	0.006931	0.007071	23	0.003839	0.003061	24
0.343047	0.00417	0.001648	17	0.006767	0.002133	20	0.00651	0.006487	23	0.003778	0.002943	24
0.376494	0.00431	0.001772	17	0.007101	0.002249	20	0.006026	0.005614	23	0.003703	0.002754	24
0.413201	0.004472	0.00187	17	0.007475	0.002303	20	0.005584	0.004984	23	0.003621	0.002506	24
0.453488	0.004665	0.001917	17	0.007845	0.002313	20	0.00518	0.004607	23	0.00354	0.002239	24
0.497702	0.004915	0.001941	17	0.008204	0.002263	20	0.004783	0.004289	23	0.003461	0.001987	24
0.546228	0.005253	0.001988	17	0.008638	0.002252	20	0.004419	0.004008	23	0.003385	0.001769	24
0.599484	0.005707	0.002094	17	0.009236	0.002284	20	0.004098	0.003748	23	0.003313	0.001593	24
0.657933	0.006311	0.002298	17	0.010038	0.002295	20	0.003802	0.003446	23	0.003248	0.001462	24
0.722081	0.007114	0.002641	17	0.011113	0.002272	20	0.003514	0.003023	23	0.003193	0.001369	24
0.792483	0.008194	0.003184	17	0.012584	0.002258	20	0.00324	0.002481	23	0.00315	0.0013	24
0.869749	0.00964	0.00398	17	0.014678	0.002407	20	0.003007	0.001939	23	0.003122	0.001241	24
0.954548	0.0116	0.005093	17	0.017794	0.00289	20	0.002826	0.001503	23	0.003113	0.001186	24
1.04762	0.014208	0.006592	17	0.022658	0.003801	20	0.002694	0.001189	23	0.003129	0.001142	24
1.14976	0.017635	0.008642	17	0.03067	0.005314	20	0.002608	0.00097	23	0.00318	0.00112	24
1.26186	0.022346	0.011888	17	0.043661	0.00791	20	0.002562	0.000839	23	0.003271	0.001128	24
1.38489	0.028671	0.017051	17	0.061514	0.01065	20	0.002549	0.000791	23	0.003406	0.001161	24
1.51991	0.035691	0.023896	17	0.078831	0.011346	20	0.002546	0.000771	23	0.00359	0.001209	24
1.6681	0.038724	0.027236	17	0.086474	0.011872	20	0.002533	0.00072	23	0.003824	0.00126	24
1.83074	0.033955	0.023355	17	0.079698	0.014134	20	0.002513	0.00065	23	0.004112	0.001306	24
2.00923	0.025573	0.016832	17	0.063009	0.012763	20	0.002494	0.000595	23	0.004455	0.001347	24
2.20513	0.018119	0.010723	17	0.045105	0.008301	20	0.002481	0.000567	23	0.004852	0.001389	24
2.42013	0.01316	0.00734	17	0.031395	0.005628	20	0.002474	0.000572	23	0.005295	0.001437	24
2.65609	0.010062	0.005301	17	0.022216	0.00416	20	0.002478	0.000605	23	0.005766	0.001492	24
2.91505	0.008024	0.003829	17	0.016094	0.002972	20	0.002493	0.000654	23	0.006247	0.00155	24
3.19927	0.006649	0.002855	17	0.01191	0.002119	20	0.002524	0.000713	23	0.006712	0.001606	24
3.51119	0.005715	0.002276	17	0.00904	0.001546	20	0.002574	0.00078	23	0.007138	0.001668	24
3.85353	0.005088	0.001961	17	0.007085	0.001147	20	0.002643	0.000858	23	0.007509	0.001738	24
4.22924	0.004671	0.001821	17	0.005734	0.00087	20	0.002731	0.000946	23	0.007824	0.001804	24
4.64159	0.004405	0.001799	17	0.004786	0.000707	20	0.002833	0.001035	23	0.008087	0.001844	24
5.09414	0.004239	0.001839	17	0.004112	0.000637	20	0.002941	0.00111	23	0.008328	0.001876	24
5.59081	0.00413	0.001902	17	0.003631	0.000621	20	0.003044	0.001155	23	0.00859	0.001939	24
6.13591	0.004057	0.00197	17	0.003286	0.000628	20	0.003131	0.001167	23	0.008911	0.002049	24
6.73415	0.00401	0.002046	17	0.003037	0.000639	20	0.003191	0.001154	23	0.009303	0.002178	24
7.39072	0.003993	0.00214	17	0.002855	0.000648	20	0.003221	0.001136	23	0.009783	0.002284	24
8.11131	0.004014	0.002262	17	0.002726	0.000661	20	0.003222	0.001132	23	0.010374	0.002353	24
8.90215	0.004078	0.002417	17	0.002646	0.000697	20	0.003194	0.001152	23	0.011107	0.002408	24
9.7701	0.004188	0.002607	17	0.002614	0.000768	20	0.003136	0.001187	23	0.01204	0.002493	24
10.7227	0.004349	0.002836	17	0.002629	0.000872	20	0.003048	0.001221	23	0.013215	0.002669	24
11.7681	0.004568	0.003103	17	0.002686	0.000995	20	0.00293	0.001239	23	0.014725	0.003032	24
12.9155	0.004857	0.003415	17	0.002778	0.001125	20	0.002785	0.001224	23	0.016625	0.003512	24
14.1747	0.005208	0.003772	17	0.002899	0.001255	20	0.002618	0.001167	23	0.01909	0.004165	24
15.5568	0.00561	0.00417	17	0.003045	0.001397	20	0.00244	0.001074	23	0.022277	0.004978	24
17.0735	0.00604	0.004601	17	0.003211	0.001565	20	0.002262	0.000959	23	0.026363	0.006098	24
18.7382	0.006465	0.005057	17	0.003378	0.001755	20	0.002094	0.000843	23	0.031635	0.007914	24
20.5651	0.006804	0.005488	17	0.003512	0.001943	20	0.00194	0.000739	23	0.038116	0.011126	24
22.5702	0.006968	0.005827	17	0.003564	0.002073	20	0.0018	0.000652	23	0.044971	0.015652	24
24.7708	0.006884	0.006002	17	0.003481	0.002066	20	0.001671	0.000582	23	0.049677	0.019038	24
27.1859	0.006549	0.005986	17	0.003258	0.001897	20	0.001553	0.000525	23	0.048859	0.017703	24
29.8365	0.006027	0.005801	17	0.002936	0.001629	20	0.001441	0.000478	23	0.042372	0.012155	24
32.7455	0.005407	0.005494	17	0.002569	0.001318	20	0.001335	0.000438	23	0.033836	0.006888	24
35.9381	0.004791	0.005112	17	0.002213	0.001035	20	0.001234	0.000404	23	0.026349	0.0047	24
39.4421	0.004196	0.004677	17	0.001899	0.000806	20	0.001137	0.000374	23	0.020629	0.004524	24
43.2876	0.003642	0.004235	17	0.001624	0.00062	20	0.001044	0.000346	23	0.016406	0.004459	24
47.5081	0.003152	0.00381	17	0.001393	0.000479	20	0.000955	0.000321	23	0.013133	0.004224	24
52.1401	0.002729	0.003413	17	0.0012	0.000374	20	0.000872	0.000297	23	0.010613	0.003887	24
57.2237	0.002367	0.003048	17	0.00104	0.000297	20	0.000793	0.000274	23	0.008668	0.003502	24
62.8029	0.00206	0.002716	17	0.000905	0.00024	20	0.000719	0.000252	23	0.007161	0.003106	24
68.9261	0.001798	0.002416	17	0.000792	0.000198	20	0.00065	0.000231	23	0.005977	0.002726	24
75.6463	0.001574	0.002147	17	0.000696	0.000167	20	0.000587	0.000211	23	0.005035	0.002378	24
83.0218	0.001382	0.001907	17	0.000614	0.000142	20	0.000529	0.000193	23	0.004276	0.00207	24
91.1163	0.001217	0.001694	17	0.000543	0.000123	20	0.000477	0.000176	23	0.003656	0.001802	24
100	0.001074	0.001505	17	0.000481	0.000108	20	0.000429	0.00016	23	0.003145	0.001572	24

## Sheet: Supplement 1D
Sec	CaaX		Free Halo		H2B
0	0	0	0	0	0	0
0.01	2040	1020	3324	981	4374	1380
0.02	3816	1848	6546	1908	7302	2328
0.03	5502	2628	9747	2817	10188	3297
0.04	7164	3402	12816	3699	13002	4254
0.05	8844	4170	15798	4542	15783	5151
0.06	10422	4860	18684	5319	18486	6045
0.07	11940	5520	21486	6042	21153	6891
0.08	13410	6168	24138	6750	23781	7680
0.09	14826	6786	26592	7419	26316	8544
0.1	16218	7356	29067	8067	28794	9300
0.11	17502	7944	31413	8775	31074	10113
0.12	18726	8460	33597	9408	33405	10836
0.13	19908	8988	35700	9954	35694	11535
0.14	21042	9486	37722	10575	37797	12234
0.15	22128	9924	39585	11130	39678	12843

## Sheet: Supplement 1C CaaX
diff_coef_value	Cell1	Cell2	Cell3	Cell4	Cell5	Cell6	Cell7	Cell8	Cell9	Cell10	Cell11	Cell12	Cell13	Cell14	Cell15	Cell16	Cell17	Cell18	Cell19	Cell20	Cell21	Cell22	Cell23	Cell24	Cell25	Cell26	Cell27	Cell28	Cell29	Cell30	Cell31	Cell32	Cell33	Cell34	Cell35	Cell36	Cell37	Cell38	Cell39	Cell40	Cell41	Cell42	Cell43	Cell44	Cell45	Cell46	Cell47	Cell48	Cell49
0.01	0.0925614	0.356378	0.00510342	0.0680799	0.0163136	0.0144612	0.0280678	0.017324	0.0122611	0.0185888	0.0151338	0.0115486	0.00122395	0.013131	0.144006	0.00299232	0.000570736	0.000743842	0.0475651	0.00153257	0.00249983	0.0157041	0.0112945	0.0107898	0.0198682	0.0538175	0.00479335	0.0021548	0.0249289	0.00523254	0.0417878	0.0364686	0.0151959	0.00124987	0.00898702	0.00210009	0.0297594	0.00243681	0.0012497	0.00412848	0.00320253	0.055364	0.00429407	0.0193191	0.00344302	0.0066332	0.00430489	0.0325592	0.00447638
0.010975	0.0232455	0.0174079	0.00506907	0.022761	0.016336	0.00915981	0.0136278	0.0149154	0.0098867	0.0107818	0.0134666	0.00601318	0.00122686	0.00914407	0.0521558	0.00307822	0.000576334	0.000753822	0.0160432	0.00154586	0.00249138	0.0137679	0.0101918	0.0104508	0.0141253	0.0222525	0.00444339	0.00216151	0.00916978	0.00512082	0.0172154	0.0123238	0.01205	0.00124438	0.00664558	0.00210331	0.00839639	0.00247093	0.00125655	0.00409113	0.00321705	0.0159644	0.00418813	0.0185282	0.00339688	0.00654419	0.00445838	0.0184358	0.00406158
0.012045	0.0122007	0.011836	0.00503855	0.0158434	0.0163574	0.00811298	0.0106302	0.0135413	0.00875487	0.00796895	0.012049	0.00465591	0.00122999	0.0083627	0.0337665	0.00317365	0.000582543	0.000764837	0.0105492	0.0015604	0.00248243	0.012206	0.00925722	0.0101338	0.0114386	0.0141339	0.00414541	0.0021687	0.00687598	0.00498491	0.0116708	0.00861822	0.0101541	0.00123888	0.00547147	0.00210702	0.00613056	0.00250761	0.00126409	0.00405216	0.00323301	0.0081874	0.00408739	0.0177584	0.00336527	0.00645383	0.00462438	0.0134178	0.00377678
0.0132194	0.00824443	0.00965749	0.005013	0.0128192	0.0163691	0.00764731	0.00942365	0.0127257	0.00815317	0.00642681	0.0108205	0.00397264	0.00123345	0.0080997	0.0255463	0.0032799	0.000589437	0.000776998	0.0081559	0.00157631	0.00247299	0.0109262	0.00845753	0.00983925	0.00988295	0.010626	0.0038898	0.00217641	0.00566295	0.00483031	0.00939131	0.00685764	0.00897993	0.00123345	0.00479235	0.00211131	0.0051449	0.00254695	0.0012724	0.00401175	0.00325056	0.00521811	0.00399261	0.017033	0.00334751	0.00636317	0.00480301	0.0106971	0.00357486
0.0145083	0.00627167	0.00841026	0.00499364	0.0110497	0.016359	0.0073769	0.00875404	0.0122214	0.00781671	0.00544618	0.00971605	0.0035532	0.00123735	0.00801957	0.0207035	0.00339833	0.0005971	0.00079043	0.00676053	0.0015937	0.00246311	0.00986265	0.0077678	0.00956758	0.00886112	0.00867834	0.0036699	0.00218465	0.00488395	0.00466291	0.00811154	0.0058155	0.00823578	0.00122818	0.00434025	0.00211627	0.00455703	0.00258904	0.00128156	0.00397009	0.00326987	0.0037645	0.00390449	0.0163679	0.00334269	0.00627343	0.00499402	0.00879404	0.00342781
0.0159228	0.00506322	0.00755859	0.00498178	0.00974156	0.0164149	0.00720462	0.00832935	0.0118864	0.00763528	0.00479559	0.00873875	0.00326546	0.00124186	0.0081076	0.0174885	0.00353049	0.00060563	0.000805276	0.00587061	0.00161271	0.00245284	0.00896861	0.0072407	0.00931921	0.00816518	0.00730746	0.00348091	0.00219347	0.00435061	0.00448884	0.00725057	0.0051704	0.00771149	0.00122318	0.00402717	0.00212203	0.00416652	0.00263395	0.00129165	0.00392743	0.00329111	0.00295633	0.00382372	0.015772	0.00334951	0.00618625	0.00519677	0.00741	0.00334115
0.0174753	0.00424536	0.0069282	0.00497883	0.00880921	0.0163257	0.00709336	0.00806887	0.011631	0.00755522	0.00429127	0.00788601	0.00305742	0.00124719	0.0083136	0.0153586	0.00367808	0.000615139	0.000821694	0.00528436	0.00163348	0.00244226	0.00832766	0.00672552	0.00909446	0.0076824	0.00629443	0.00331952	0.00220292	0.00397582	0.00431337	0.00665868	0.00466827	0.00733813	0.00121856	0.00380519	0.00212871	0.00388856	0.00268173	0.00130278	0.00388408	0.00331449	0.00246928	0.00375101	0.0152448	0.00336625	0.00610351	0.00541031	0.00637717	0.00325879
0.0191791	0.0036727	0.00644388	0.00498626	0.00805973	0.0161751	0.007025	0.00787072	0.011399	0.00754603	0.00390233	0.00714555	0.00290402	0.00125361	0.00865188	0.0136731	0.00384292	0.000625759	0.00083986	0.00489128	0.00165616	0.00243146	0.00768614	0.00627453	0.00889357	0.00735231	0.00551311	0.00318347	0.00221305	0.003745	0.00414506	0.00612014	0.0042842	0.00703677	0.00121448	0.00364872	0.00213647	0.00367948	0.00273239	0.00131504	0.00384041	0.00334023	0.00216008	0.00368714	0.0147765	0.00339073	0.00602741	0.00563315	0.00559492	0.00319327
0.021049	0.00326651	0.00606726	0.00500558	0.00747472	0.0159556	0.00698926	0.00772747	0.0112164	0.0075878	0.0035968	0.00654194	0.00279144	0.00126145	0.00913646	0.0123752	0.00402691	0.00063764	0.000859979	0.00462479	0.00168091	0.00242057	0.00712995	0.00587942	0.00871665	0.00714057	0.00489615	0.00307065	0.00222394	0.00358196	0.00400209	0.00564141	0.00398242	0.00686047	0.0012111	0.00354317	0.00214548	0.00351593	0.0027859	0.00132857	0.00379683	0.00336858	0.00195934	0.00363285	0.0143461	0.00342033	0.00596053	0.00586356	0.00499591	0.00313983
0.0231013	0.00298141	0.00577676	0.00503834	0.00701691	0.0156665	0.00698	0.00762183	0.0109844	0.00766583	0.00335405	0.00600475	0.00271143	0.00127114	0.00973423	0.0113575	0.00423145	0.00065096	0.000882266	0.0044408	0.00170791	0.00240972	0.00664551	0.00553369	0.00856392	0.00702899	0.00440023	0.00297941	0.00223567	0.00350332	0.00384229	0.00519491	0.00374229	0.00670574	0.00120861	0.00349285	0.00215596	0.00338443	0.00284215	0.00134349	0.00375383	0.00339981	0.00182725	0.00358899	0.0139215	0.00345209	0.00590582	0.00609936	0.00453186	0.00309572
0.0253536	0.00278669	0.00555963	0.00508609	0.00666292	0.0153142	0.00699372	0.00754355	0.0107513	0.00776826	0.00315969	0.00552503	0.00265885	0.00128318	0.0102995	0.0105545	0.00445629	0.000665928	0.000906981	0.00431003	0.00173735	0.00239913	0.006223	0.00523197	0.00843539	0.00700986	0.00399442	0.00290875	0.00224836	0.00350956	0.00368913	0.00476475	0.00355063	0.00658095	0.00120724	0.00346768	0.00216813	0.00327697	0.00290091	0.00135995	0.00371195	0.00343423	0.00174436	0.0035564	0.0134656	0.00348298	0.00586671	0.00633839	0.00416892	0.0030597
0.0278256	0.00266068	0.00540838	0.00515037	0.00639768	0.0149109	0.00702914	0.00748634	0.0105537	0.00788485	0.00300306	0.00510807	0.00263054	0.00129822	0.0105735	0.00992494	0.00469716	0.000682792	0.000934403	0.00421202	0.00176943	0.00238897	0.00585481	0.00496985	0.00833081	0.00709702	0.00365805	0.00285826	0.00226215	0.00360732	0.00354408	0.00434335	0.00339705	0.00647394	0.00120724	0.00347666	0.00218225	0.00318882	0.00296181	0.00137814	0.00367178	0.00347219	0.00169907	0.00353596	0.0129497	0.00351019	0.00584722	0.00657867	0.00388357	0.00303173
0.0305386	0.00259044	0.00531901	0.00523267	0.00621091	0.014471	0.007087	0.00744475	0.0104203	0.00800672	0.00287588	0.00474712	0.00262463	0.00131702	0.0103806	0.00943892	0.00494355	0.000701846	0.000964859	0.00413277	0.00180437	0.0023795	0.00553458	0.00474346	0.00824973	0.00721412	0.00337721	0.002828	0.00227721	0.00378636	0.0034091	0.00393185	0.00327375	0.00637521	0.00120888	0.0035182	0.00219861	0.00311754	0.00302428	0.00139823	0.00363396	0.00351406	0.00168511	0.00352853	0.0123668	0.00353143	0.00585215	0.00681853	0.00365916	0.00301296
0.033516	0.00256589	0.00528999	0.00533437	0.00609537	0.0140055	0.00716949	0.0074122	0.0104373	0.00812606	0.0027712	0.00443581	0.00264023	0.00134054	0.00971313	0.00907286	0.00518056	0.000723442	0.000998704	0.00406168	0.00184241	0.00237101	0.00525725	0.00454953	0.00819124	0.00729094	0.00314224	0.00281843	0.00229377	0.00409571	0.00328616	0.00353753	0.00317474	0.00627857	0.00121248	0.00359064	0.00221754	0.00306223	0.00308752	0.00142045	0.0035992	0.00356026	0.00169943	0.0035349	0.0117361	0.00354522	0.00588714	0.00705683	0.00348337	0.00300588
0.0367838	0.00258038	0.00532176	0.00545671	0.00604625	0.0135176	0.00728008	0.00737903	0.0104834	0.00823658	0.00268336	0.0041683	0.00267721	0.00136995	0.00891273	0.00880755	0.00539689	0.000748004	0.00103636	0.00399294	0.0018838	0.00236381	0.00501912	0.00438526	0.00815426	0.00712932	0.00294637	0.00283039	0.00231206	0.00447222	0.00317717	0.00317105	0.00309537	0.00618151	0.0012184	0.0036916	0.00223941	0.0030232	0.00315046	0.00144507	0.00356823	0.00361127	0.00174206	0.00355576	0.0110925	0.00355099	0.0059593	0.00729324	0.00334688	0.00301494
0.0403702	0.0026292	0.00541632	0.00560074	0.00606026	0.013001	0.00742243	0.00732932	0.0106061	0.00833351	0.00260768	0.00393895	0.00273603	0.00140669	0.00829428	0.00862543	0.00558885	0.000776047	0.00107827	0.00392254	0.00192882	0.00235828	0.00481677	0.00424819	0.00813726	0.00670345	0.00278464	0.002865	0.00233239	0.0048153	0.00308358	0.00284308	0.00303165	0.00608382	0.00122703	0.00381609	0.0022646	0.00300155	0.00321177	0.00147239	0.00354183	0.0036676	0.00181509	0.00359163	0.0104707	0.00354898	0.00607726	0.00752774	0.00324215	0.00304687
0.0443062	0.00270911	0.00557681	0.00576722	0.00613538	0.0124473	0.00759897	0.0072403	0.010782	0.00841381	0.00254048	0.00374214	0.00281758	0.00145259	0.00802467	0.00850946	0.00574609	0.000808194	0.00112499	0.00384816	0.00197778	0.00235483	0.004647	0.0041362	0.00813837	0.00616441	0.00265332	0.0029236	0.00235508	0.00499779	0.00300626	0.00255865	0.00298001	0.00598674	0.00123881	0.00395518	0.00229356	0.00299882	0.00326986	0.00150276	0.00352081	0.00372985	0.0019232	0.00364283	0.00989598	0.00354008	0.00625126	0.00776048	0.00316286	0.00311117
0.048626	0.0028175	0.00580713	0.00595658	0.00627036	0.0118612	0.00780885	0.00708672	0.0109883	0.00847623	0.00247922	0.0035733	0.00292309	0.0015099	0.00815174	0.00844358	0.00583188	0.000845213	0.00117709	0.00377394	0.00203102	0.00235398	0.00450686	0.00404744	0.00815541	0.0056838	0.00254969	0.00300762	0.00238051	0.00499615	0.00294557	0.00231723	0.00293706	0.0058923	0.00125422	0.00409661	0.00232677	0.00301655	0.00332298	0.00153664	0.00350602	0.00379866	0.00207571	0.00370941	0.00938184	0.00352559	0.00649243	0.00799115	0.00310378	0.00321954
0.053367	0.00295232	0.00611125	0.00616884	0.00646438	0.0112656	0.00804528	0.00685391	0.0111502	0.00852112	0.00242261	0.00343011	0.00305394	0.0015815	0.00881089	0.00841465	0.00580608	0.000888044	0.00123526	0.00370236	0.00208893	0.00235631	0.00439381	0.00398028	0.00818605	0.00535069	0.00247172	0.00311837	0.00240904	0.00493371	0.00290145	0.00211517	0.00289956	0.00580381	0.00127377	0.00421516	0.00236473	0.00305559	0.00336934	0.00157459	0.00349835	0.00387474	0.00229831	0.00379127	0.0089329	0.00350708	0.0068119	0.00821879	0.0030609	0.00338293
0.0585702	0.00311589	0.006492	0.00640347	0.00671596	0.0106946	0.00829287	0.00654954	0.0113809	0.00855004	0.00237063	0.00331259	0.00321132	0.00167102	0.00970461	0.00841405	0.00567118	0.000937849	0.00130026	0.00363679	0.00215193	0.00236256	0.00430556	0.0039332	0.00822763	0.00511623	0.00241804	0.0032567	0.00244109	0.004932	0.00287416	0.00194752	0.00286436	0.00572559	0.00129803	0.00432422	0.00240799	0.00311501	0.00340736	0.00161729	0.00349871	0.00395891	0.00262932	0.00388804	0.00854804	0.00348622	0.00722201	0.00844136	0.00303163	0.00359603
0.0642807	0.00331012	0.00694955	0.00665936	0.00702282	0.0101805	0.00852629	0.006202	0.0116028	0.00856575	0.00232465	0.00322289	0.00339596	0.00178305	0.0102091	0.0084373	0.0054749	0.000996065	0.00137298	0.00358119	0.00222054	0.00237361	0.00424003	0.00390486	0.00827736	0.00498799	0.00238786	0.00342274	0.00247704	0.00490622	0.00286503	0.00180923	0.00282862	0.00566326	0.00132759	0.00439046	0.00245715	0.00319115	0.00343606	0.00166569	0.00350806	0.00405206	0.00301239	0.00399907	0.00822324	0.0034649	0.0077393	0.00865623	0.00301457	0.00378028
0.070548	0.0035416	0.00747915	0.0069347	0.00738091	0.00974638	0.00870964	0.00584486	0.0117893	0.00857165	0.00228727	0.00316434	0.00360752	0.00192341	0.00984542	0.00848015	0.00526715	0.00106447	0.0014544	0.00353504	0.00229536	0.00239059	0.00419521	0.00389406	0.00833193	0.00496324	0.00238095	0.00361574	0.0025173	0.00470012	0.0028769	0.00169571	0.00279008	0.00563306	0.00136308	0.00442715	0.00251282	0.00327758	0.00345548	0.00172098	0.00352738	0.00415519	0.00323632	0.00412288	0.0079531	0.00344525	0.0083588	0.00886052	0.00300857	0.00383383
0.0774264	0.003819	0.00806801	0.00722688	0.00778476	0.0094047	0.00879831	0.00552732	0.0119029	0.00857157	0.00226224	0.00314053	0.0038438	0.0020995	0.00896769	0.00853435	0.00507409	0.00114529	0.00154566	0.00349144	0.0023771	0.00241489	0.00416907	0.00389971	0.00838752	0.00503818	0.00239766	0.00383395	0.00256229	0.00427629	0.00291417	0.00160333	0.00274731	0.00563591	0.00140512	0.00440476	0.00257564	0.00336651	0.00346708	0.00178483	0.00355772	0.00426943	0.00335383	0.00425651	0.00773194	0.0034298	0.00892722	0.00905106	0.0030111	0.00365776
0.0849753	0.00415378	0.00868901	0.00753253	0.0082279	0.00915923	0.00874759	0.00521945	0.0119072	0.00856968	0.00225437	0.00315504	0.00409993	0.00232072	0.00806367	0.00858649	0.0049006	0.00124123	0.00164805	0.00344749	0.00246663	0.0024483	0.00415956	0.00392085	0.00843976	0.00518605	0.00243896	0.00407379	0.00261245	0.00385243	0.00298254	0.00152963	0.00270016	0.00564812	0.00145437	0.00430999	0.0026463	0.00345035	0.00347416	0.00185948	0.00360013	0.00439608	0.00350651	0.0043951	0.00755425	0.00342169	0.00911492	0.00922516	0.00301788	0.00339962
0.0932603	0.00455803	0.00928806	0.00784739	0.00870145	0.00900685	0.00853045	0.00495217	0.0117857	0.0085701	0.00226963	0.00321147	0.00436738	0.00259907	0.00726905	0.00862045	0.00474	0.0013557	0.00176304	0.00341791	0.00256505	0.00249308	0.00416454	0.0039567	0.00848383	0.00541678	0.0025066	0.00432752	0.00266831	0.00356197	0.00308865	0.00147349	0.00264981	0.00568073	0.00151146	0.00415883	0.00272549	0.00352098	0.00348175	0.00194801	0.0036557	0.00453658	0.00369087	0.00453316	0.00741512	0.00342479	0.00877761	0.009381	0.00302472	0.00315135
0.102353	0.00504124	0.00977205	0.00816636	0.00919262	0.00893891	0.00815635	0.00473321	0.0115568	0.00857698	0.00231543	0.00331372	0.00463378	0.0029499	0.00652717	0.00862287	0.00458112	0.00149287	0.00189232	0.00343299	0.00267372	0.00255213	0.00418187	0.00400659	0.00851489	0.005718	0.00260355	0.00458416	0.00273054	0.00341182	0.00323979	0.00143491	0.00259879	0.00570435	0.00157703	0.00399459	0.00281391	0.00357121	0.00349642	0.00205464	0.00372553	0.00469262	0.003862	0.00466739	0.00731046	0.00344383	0.0081638	0.00951828	0.00303113	0.00298071
0.112332	0.00559381	0.0100275	0.00848366	0.00964388	0.00894187	0.00767918	0.00456988	0.0113268	0.00859414	0.00240049	0.0034658	0.00488396	0.00339299	0.00580559	0.00858679	0.00441513	0.00165796	0.00203781	0.00352077	0.00279439	0.00262918	0.00420954	0.00407006	0.00852859	0.0060898	0.0027347	0.0048398	0.00279999	0.00337986	0.00344304	0.00141469	0.00255045	0.00564972	0.00165174	0.00385705	0.00291222	0.00360365	0.0035256	0.00218501	0.00381074	0.00486613	0.00398434	0.0047991	0.00723711	0.00348443	0.007565	0.0096391	0.00304205	0.00288672
0.123285	0.00617652	0.00997764	0.00879291	0.0101269	0.00899811	0.00718509	0.00446913	0.0110092	0.00862495	0.00253373	0.00367124	0.00510276	0.00395367	0.00519124	0.0085133	0.00424276	0.00185745	0.00220169	0.00370035	0.00292932	0.00272904	0.00424586	0.00414691	0.0085215	0.00648513	0.00290796	0.00510855	0.00287781	0.00344164	0.00370289	0.00141387	0.00250833	0.00543451	0.00173628	0.00377883	0.00302095	0.00363612	0.00357695	0.00234662	0.0039125	0.00505934	0.00403352	0.00493396	0.00719284	0.00355307	0.00709853	0.00974829	0.00306574	0.00285608
0.135305	0.00673062	0.00960835	0.00908741	0.0105824	0.00908657	0.00675875	0.00443718	0.0106742	0.0086719	0.00272265	0.0039322	0.00527914	0.00466403	0.0047229	0.00841208	0.00407459	0.0020996	0.00238648	0.00398456	0.00308149	0.00285807	0.00428967	0.00423737	0.00849152	0.00687145	0.00313587	0.00541699	0.00296551	0.00357877	0.00401547	0.00143326	0.00247553	0.00508728	0.00183147	0.00373601	0.00314034	0.00369271	0.00365766	0.00254914	0.00403207	0.00527483	0.0039975	0.00508137	0.00717634	0.00365688	0.00677138	0.00985358	0.00310971	0.0028777
0.148497	0.00720153	0.00894351	0.00936058	0.0109744	0.00918288	0.00645209	0.00447986	0.0103286	0.00873609	0.00297564	0.00424857	0.00541034	0.0055631	0.00442532	0.00829955	0.00392277	0.00239497	0.00259507	0.00437865	0.00325487	0.00302469	0.00434062	0.00434223	0.00843787	0.00721407	0.00343721	0.00578843	0.00306498	0.00377811	0.00436272	0.00147319	0.00245436	0.00474109	0.00193842	0.00374039	0.00327007	0.00379214	0.00377396	0.00280473	0.00417095	0.00551556	0.0038882	0.00525619	0.00718727	0.00380326	0.00657116	0.00996602	0.00317786	0.00294647
0.162975	0.00756066	0.00806112	0.00960637	0.0112646	0.00925993	0.00628314	0.0046033	0.00998664	0.00881682	0.00330313	0.0046165	0.00550428	0.00669288	0.00430564	0.00819372	0.00379394	0.00275729	0.00283075	0.00487383	0.00345473	0.00324021	0.00439942	0.00446316	0.00836117	0.00748442	0.00383848	0.00623108	0.00317861	0.00403038	0.00472679	0.00153343	0.0024464	0.00449758	0.00205868	0.00379343	0.00340913	0.00394567	0.00393088	0.00312829	0.00433106	0.00578492	0.00374374	0.00548049	0.00722674	0.00399932	0.00649206	0.0101006	0.00327005	0.00306051
0.178865	0.00780863	0.00710891	0.0098198	0.0114482	0.00929074	0.00625112	0.00481423	0.00966737	0.00891152	0.0036895	0.00502748	0.00557872	0.00808335	0.00435657	0.00810805	0.0036891	0.00320457	0.00309731	0.00543612	0.00368806	0.00351969	0.00446796	0.00460307	0.00826318	0.00768689	0.00437526	0.00672714	0.00330936	0.00433371	0.00512537	0.0016134	0.00245271	0.00439651	0.00219462	0.00390009	0.00355572	0.00416057	0.00413225	0.0035375	0.00451501	0.00608666	0.00360258	0.00578111	0.00729814	0.00425112	0.00653668	0.0102739	0.00338276	0.00321729
0.196304	0.00796299	0.00623504	0.0099975	0.0115605	0.00925411	0.00634887	0.00511892	0.00938653	0.00901627	0.00406338	0.00546838	0.00565807	0.0097218	0.00457409	0.00804915	0.00360656	0.00376041	0.00339909	0.0060123	0.00396409	0.00388304	0.00454931	0.0047665	0.008147	0.00776077	0.00509382	0.00718764	0.00346083	0.00469864	0.00561758	0.0017127	0.00247431	0.00445479	0.00234984	0.00406974	0.00370773	0.00444389	0.00438099	0.00405268	0.00472655	0.00642484	0.00349191	0.00618412	0.00740823	0.004563	0.00671514	0.0104987	0.00351032	0.00341033
0.215443	0.00803469	0.00552321	0.0101381	0.0117022	0.00913994	0.00656881	0.00551701	0.0091522	0.00912694	0.00429924	0.00592258	0.00576895	0.0115133	0.00496804	0.00801731	0.00354454	0.00445524	0.00374111	0.00656899	0.00429474	0.00435587	0.00464735	0.00496002	0.00801689	0.00777645	0.00605448	0.00758737	0.00363759	0.0051455	0.00627809	0.00183164	0.00251258	0.00470381	0.00252975	0.00431462	0.00386382	0.00480464	0.0046798	0.0046963	0.00497117	0.00680371	0.00342766	0.00671046	0.00756821	0.00493702	0.00704528	0.0107745	0.00364601	0.00362386
0.236449	0.00801706	0.00499437	0.0102425	0.0119981	0.00895229	0.00690492	0.00599127	0.00896897	0.00924083	0.00418109	0.00637028	0.00593708	0.0132354	0.00556868	0.00800766	0.00350252	0.00532718	0.00412911	0.00712445	0.00469515	0.00497037	0.00476623	0.00519256	0.00787859	0.00774923	0.00733644	0.00781342	0.00384542	0.00569406	0.00718427	0.00197197	0.00256972	0.00522797	0.00274219	0.00464094	0.00402564	0.00525466	0.00503224	0.00549218	0.00525695	0.00722747	0.00342318	0.00731949	0.00779412	0.00537301	0.00755345	0.0110634	0.00378324	0.00383248
0.259502	0.0078962	0.00463593	0.0103142	0.0124821	0.00870951	0.00735248	0.00650849	0.00884232	0.00935825	0.0036297	0.00678658	0.0061859	0.0144483	0.00643484	0.00801032	0.00348157	0.00642145	0.00456971	0.00772207	0.00518405	0.00576592	0.0049098	0.00547562	0.00773947	0.0076962	0.00902987	0.00786873	0.00409186	0.00632115	0.0084255	0.00213747	0.00264872	0.00626008	0.00299809	0.00510388	0.00420077	0.00580829	0.00544381	0.0064642	0.00559574	0.0077	0.00349726	0.00811856	0.00810618	0.00586974	0.00827464	0.011226	0.00391695	0.00401764
0.284804	0.00767146	0.00442338	0.0103604	0.0132508	0.00843928	0.00790493	0.00703993	0.00878131	0.00948372	0.00307573	0.0071427	0.00653667	0.0149424	0.0076688	0.00801045	0.0034844	0.00778748	0.00507053	0.00838731	0.00578398	0.00678929	0.00508149	0.00582363	0.00760855	0.00762384	0.011082	0.00783019	0.00438682	0.00700852	0.0100759	0.0023343	0.0027531	0.00905611	0.00331205	0.00577048	0.00440612	0.00647971	0.00592306	0.00763456	0.0060047	0.00822449	0.00368525	0.00902292	0.00852733	0.00642798	0.00925023	0.010955	0.00404563	0.00419964
0.312572	0.00736965	0.00433079	0.010395	0.0142283	0.00816948	0.00854448	0.00759856	0.00879719	0.00962637	0.0027783	0.00741219	0.0070093	0.0146928	0.00946603	0.00799007	0.00351534	0.00947241	0.00564036	0.00911636	0.00652077	0.0080932	0.00528531	0.00625433	0.00749662	0.00750313	0.0129511	0.00778182	0.0047433	0.00758879	0.0124123	0.00257091	0.0028869	0.0192565	0.00370316	0.00687248	0.00467044	0.0072768	0.00648179	0.00902174	0.00650838	0.00880316	0.00404566	0.00998793	0.00908159	0.007056	0.0105203	0.0100214	0.00417378	0.00443913
0.343047	0.00704133	0.00433516	0.0104416	0.0152924	0.0079204	0.00922553	0.00818776	0.00889926	0.00979991	0.00273483	0.0075855	0.00762397	0.0138836	0.0124926	0.00793307	0.00358005	0.011511	0.00628933	0.00988218	0.00742123	0.00973018	0.0055286	0.00678925	0.00741657	0.00738542	0.0138735	0.00777853	0.00517827	0.00793116	0.0156244	0.00285772	0.00305512	0.0236858	0.00419606	0.00881272	0.00503558	0.00818878	0.00713442	0.0106383	0.00714126	0.00943709	0.00464906	0.0109586	0.00979256	0.00777679	0.0121071	0.00868571	0.00431453	0.00479945
0.376494	0.0067472	0.0044189	0.0105377	0.0163885	0.00770295	0.00987048	0.00903936	0.00908981	0.0100234	0.00289254	0.00768735	0.00840375	0.01298	0.0153445	0.0078332	0.00368527	0.0139126	0.00702916	0.0106338	0.00850809	0.0117405	0.00582686	0.00745448	0.00738504	0.00723206	0.0139233	0.00786928	0.00571374	0.00802588	0.0190138	0.00320662	0.00326483	0.0116288	0.00482227	0.0123482	0.00555704	0.00916705	0.00789619	0.0124886	0.00795085	0.0101262	0.00553271	0.0118848	0.0106815	0.00863519	0.0139944	0.00742693	0.00449138	0.00532508
0.413201	0.00655377	0.00457224	0.0107352	0.0171917	0.0075213	0.0104068	0.0101535	0.00935689	0.0103239	0.00322741	0.00777857	0.0093775	0.0122701	0.0138875	0.0077009	0.00383815	0.0166474	0.00787347	0.0112766	0.00979233	0.0141371	0.00620984	0.00828208	0.00742499	0.00707445	0.0137364	0.00805936	0.00637855	0.00797169	0.0201892	0.00363105	0.00352682	0.00739581	0.00561976	0.0155421	0.00630498	0.0101289	0.00878047	0.0145675	0.00900097	0.0108695	0.00664109	0.0126806	0.0117641	0.00970279	0.016088	0.00650145	0.00473819	0.00602105
0.453488	0.00653348	0.0047959	0.0110963	0.0174326	0.00737703	0.0108405	0.0116251	0.00966386	0.0107423	0.00374111	0.00793444	0.010583	0.0119126	0.0113088	0.00756237	0.00404553	0.0196356	0.00883808	0.0116465	0.0112661	0.0168658	0.00672743	0.00931236	0.00756734	0.00696375	0.0136042	0.00835046	0.00721148	0.00789254	0.0189416	0.00414747	0.00385777	0.00618154	0.00661684	0.0143694	0.00736624	0.0109976	0.00979467	0.0168576	0.0103749	0.0116657	0.00781278	0.0134572	0.0130442	0.0110813	0.0180993	0.00595083	0.00509713	0.00694193
0.497702	0.00677733	0.00510343	0.0116884	0.0168821	0.00727259	0.0112937	0.0132325	0.00993526	0.0113392	0.00445236	0.00817378	0.0120742	0.01199	0.0101169	0.00744948	0.00431352	0.022743	0.00994152	0.0115926	0.0129035	0.0197455	0.00745399	0.0105971	0.0078485	0.00697261	0.0135256	0.00877797	0.00826677	0.00792964	0.0173647	0.00478015	0.00428305	0.00581086	0.00775332	0.0111555	0.00884678	0.0116754	0.0109349	0.0193257	0.0121771	0.0125134	0.00888937	0.0141813	0.014506	0.0129085	0.0198933	0.00575186	0.00561576	0.00805652
0.546228	0.00741092	0.0055225	0.012575	0.01574	0.00721269	0.0119418	0.0140961	0.010051	0.0121984	0.0053936	0.00866449	0.0138846	0.0125634	0.00991138	0.00738729	0.00464807	0.0257878	0.0112053	0.0111572	0.0146782	0.0224411	0.0084921	0.0122032	0.00830249	0.00717727	0.0134468	0.0093657	0.00962229	0.00812695	0.0161182	0.0055705	0.0048403	0.00580667	0.0087858	0.00901039	0.0108722	0.0123213	0.0121792	0.0219158	0.0145317	0.0134115	0.00983491	0.0149064	0.0161051	0.0153724	0.0211218	0.0058831	0.00634323	0.0092896
0.599484	0.00861861	0.00609415	0.013805	0.0146266	0.00720405	0.0129387	0.0133015	0.00990004	0.0134224	0.00661874	0.00939804	0.0161944	0.0137079	0.0102603	0.00738818	0.00505756	0.0285619	0.0126541	0.010644	0.016602	0.0245989	0.00997866	0.0142096	0.00894987	0.0076447	0.0133591	0.0101492	0.0113901	0.00856742	0.0151952	0.00658697	0.00558453	0.00609205	0.00928443	0.00815296	0.0135794	0.0130514	0.0134833	0.0245373	0.0175723	0.0143587	0.0107906	0.015712	0.0177586	0.0187131	0.0217146	0.0063406	0.00732396	0.0104692
0.657933	0.0106471	0.00686856	0.0153925	0.0138065	0.00725385	0.0144072	0.0118893	0.00952049	0.0151195	0.00822335	0.0104941	0.0191938	0.0155303	0.0111711	0.00745497	0.00555879	0.0308657	0.0143149	0.0104675	0.0187663	0.0260886	0.0120964	0.016677	0.00978595	0.00840121	0.0133185	0.0111873	0.0137278	0.00930959	0.014504	0.00793956	0.00659655	0.00663653	0.00918973	0.00815692	0.0170812	0.014027	0.0147856	0.0270506	0.0214193	0.0153518	0.0120021	0.0166966	0.0193374	0.0231553	0.0217464	0.00714016	0.00858438	0.0115634
0.722081	0.0137517	0.00789576	0.0172807	0.0136179	0.00736838	0.0164734	0.0110567	0.00915386	0.0173839	0.0103095	0.0121039	0.0231687	0.0181836	0.0126576	0.0075915	0.00618742	0.0325481	0.0162149	0.0110288	0.0213364	0.0270592	0.0150897	0.0195514	0.0107682	0.00950702	0.0134358	0.0124826	0.0168494	0.0105446	0.0140479	0.00978797	0.00799711	0.00743564	0.00893523	0.00877024	0.0213635	0.015512	0.0160263	0.0292562	0.0261418	0.0163837	0.0137374	0.017977	0.0206613	0.0289491	0.0214767	0.00831947	0.010108	0.0128198
0.792483	0.0180662	0.00920743	0.0192929	0.0140939	0.00755248	0.0192928	0.0111346	0.00909898	0.0202561	0.013376	0.0144891	0.0288494	0.0218682	0.014964	0.00781749	0.00701107	0.0335387	0.0183773	0.0127603	0.0244608	0.0278147	0.0192509	0.0225301	0.0118058	0.0110528	0.0138567	0.014384	0.0210377	0.0123615	0.0138998	0.0122737	0.00995979	0.00849531	0.00892201	0.0100053	0.0261277	0.0178919	0.0171817	0.0308929	0.0317139	0.0174411	0.0162133	0.0196339	0.0215073	0.0369632	0.0213588	0.00994551	0.0118075	0.0146601
0.869749	0.023477	0.0107839	0.0211277	0.0153193	0.0078106	0.0233204	0.0121174	0.00960749	0.0236322	0.0179221	0.0180308	0.0370866	0.0266526	0.0186979	0.00818071	0.00814406	0.0338575	0.0208147	0.0162483	0.0280972	0.0286969	0.0246818	0.0247299	0.0127715	0.0130979	0.014749	0.0172405	0.0266541	0.0148821	0.0142203	0.0155788	0.0127298	0.00980845	0.009462	0.0121337	0.0306045	0.0217402	0.0183112	0.031669	0.0379748	0.0185026	0.0195795	0.0219223	0.0216575	0.0478928	0.0217358	0.0121327	0.0135469	0.0176156
0.954548	0.0296262	0.0125021	0.0225229	0.0174356	0.00814968	0.028855	0.0140419	0.0109074	0.0271104	0.0250023	0.0233486	0.0490395	0.0333867	0.0251672	0.00875947	0.00976343	0.0335984	0.0235211	0.0222523	0.0317819	0.0300397	0.0308058	0.025642	0.0135696	0.015729	0.0163061	0.0217993	0.0341347	0.0183463	0.0152515	0.0198328	0.016692	0.0113963	0.0107741	0.0159322	0.0335524	0.0280447	0.0196091	0.0313529	0.0445761	0.0195379	0.0240142	0.0250077	0.0210132	0.0588473	0.0228057	0.0150754	0.015266	0.022554
1.04762	0.0360287	0.0140891	0.023534	0.0206694	0.00858427	0.035989	0.0171883	0.013688	0.0300705	0.0361386	0.0306165	0.0631248	0.0425601	0.0370198	0.00965879	0.0121471	0.0328946	0.0264628	0.0314029	0.0344848	0.0321722	0.0357925	0.0252294	0.0142521	0.0193297	0.0187574	0.0303494	0.0439125	0.0232848	0.0173168	0.0250574	0.0231254	0.0134617	0.013197	0.0233443	0.0340627	0.0376285	0.0214436	0.0299353	0.0508701	0.0205096	0.030005	0.0292789	0.0197174	0.0590627	0.0246575	0.0190746	0.0170934	0.03074
1.14976	0.0421027	0.015181	0.0245589	0.0256458	0.00914517	0.0435648	0.0222194	0.0189309	0.0320867	0.051937	0.0381053	0.0708916	0.0541462	0.0524034	0.0110115	0.0156321	0.0318825	0.0295719	0.0434242	0.0350932	0.0354447	0.0378744	0.0245163	0.0150765	0.0249528	0.0223904	0.0467824	0.0560569	0.0309806	0.0208999	0.0317619	0.0357292	0.0163197	0.0173012	0.0378653	0.0326008	0.0487986	0.0243668	0.027767	0.0557215	0.0213758	0.03861	0.0353833	0.0181311	0.0485938	0.0273276	0.0245178	0.0193371	0.0422718
1.26186	0.0471337	0.0155683	0.026073	0.0336575	0.009893	0.0494936	0.0306551	0.0282779	0.0332997	0.0672864	0.043379	0.0651091	0.0667198	0.0564767	0.0129837	0.0219424	0.0306761	0.032744	0.0562982	0.0336548	0.0400553	0.0369916	0.0246444	0.0164535	0.0348837	0.0274338	0.0684008	0.069333	0.0441263	0.0268602	0.0411657	0.0636365	0.0204573	0.0252408	0.0621939	0.0305958	0.0560455	0.029116	0.0254869	0.057514	0.0220934	0.0513331	0.0437715	0.0166508	0.0392761	0.0304264	0.0318686	0.0224639	0.0538681
1.38489	0.050315	0.0153906	0.0284091	0.0475106	0.0109383	0.052962	0.0457213	0.0391636	0.0342375	0.07195	0.0468538	0.0518671	0.0763408	0.0537721	0.0157471	0.0362604	0.0293573	0.0358411	0.0663778	0.031567	0.0466793	0.0354973	0.0258194	0.0188937	0.0523108	0.0346044	0.0804223	0.0804608	0.0666847	0.0368768	0.0554519	0.100874	0.0274432	0.0445731	0.0909571	0.0290836	0.0575427	0.0365785	0.0237452	0.0551799	0.0226222	0.0688443	0.0547965	0.0155573	0.0346525	0.0345583	0.0411957	0.026904	0.0613535
1.51991	0.0511718	0.0149975	0.0316542	0.0633246	0.0124666	0.0535455	0.0711908	0.0442571	0.0351439	0.0672892	0.05123	0.0412898	0.0782574	0.0535988	0.0193908	0.0832161	0.0279822	0.0387022	0.0701292	0.0302498	0.0560208	0.0348099	0.0284331	0.0230089	0.0762959	0.0436885	0.0768373	0.0837133	0.0991463	0.0537863	0.0747327	0.113649	0.0431382	0.105226	0.10873	0.0283765	0.0575774	0.047485	0.0229668	0.0498396	0.0229282	0.088076	0.0672975	0.0149986	0.0335256	0.0381756	0.0517511	0.0348596	0.0655881
1.6681	0.0500747	0.0146925	0.0355344	0.0525564	0.0147552	0.051063	0.0981086	0.043835	0.0361419	0.0623126	0.0588062	0.0361465	0.0706933	0.0515503	0.0237179	0.171059	0.0265976	0.0411593	0.0662882	0.0304255	0.0655015	0.0350457	0.0328858	0.0294873	0.0929526	0.0519028	0.067711	0.0765278	0.125371	0.077906	0.0829877	0.0974667	0.0850785	0.206324	0.104753	0.0284375	0.0603544	0.0611855	0.02328	0.0439723	0.0229874	0.0998883	0.0753842	0.0150302	0.0344007	0.0387986	0.0580506	0.0498804	0.0705017
1.83074	0.0481322	0.0146261	0.0392708	0.0284618	0.0181591	0.0454436	0.0933463	0.0417035	0.036353	0.0600303	0.0691636	0.035364	0.0572425	0.0450299	0.0276007	0.171452	0.0252647	0.0430557	0.0566892	0.0322853	0.0657747	0.0359209	0.0397094	0.0386523	0.0854168	0.053329	0.0614316	0.0616617	0.114398	0.0946922	0.0689128	0.0727214	0.151307	0.19204	0.0844503	0.02919	0.0663557	0.0733733	0.0245317	0.039066	0.0227887	0.094163	0.0695494	0.015638	0.0358521	0.0348283	0.0544957	0.083736	0.0770406
2.00923	0.0460798	0.0148	0.0416494	0.0170873	0.0229629	0.0376902	0.0572484	0.0382426	0.0348107	0.0590769	0.0759089	0.037256	0.044023	0.0365695	0.0293488	0.0860041	0.0240788	0.0442652	0.0450595	0.035676	0.0514079	0.0367729	0.0484097	0.0498627	0.0607129	0.0472326	0.058328	0.0460574	0.0688092	0.0832255	0.0535003	0.0511166	0.137492	0.0903342	0.0599905	0.030668	0.0689191	0.0764385	0.0263139	0.0351917	0.0223372	0.0715077	0.0518401	0.0167176	0.036504	0.0294777	0.045048	0.131416	0.0795273
2.20513	0.0432015	0.0150914	0.041561	0.0124577	0.0288349	0.0296314	0.0306751	0.0328314	0.0313337	0.0564732	0.0693174	0.039151	0.0338202	0.0288222	0.0273469	0.0378604	0.0231759	0.044707	0.0348137	0.0400546	0.0356947	0.0369542	0.0568158	0.05789	0.0386205	0.0392128	0.053355	0.0338405	0.0313248	0.0547033	0.0453807	0.0356633	0.0544286	0.0403664	0.0391538	0.0330556	0.0570443	0.0657974	0.0280475	0.0317799	0.0216561	0.0445877	0.0353856	0.0180306	0.0351063	0.0256935	0.0359015	0.113017	0.0693881
2.42013	0.03765	0.0152869	0.0387431	0.0103298	0.0344216	0.0228687	0.0197292	0.0267028	0.0264242	0.0488131	0.0505357	0.0367175	0.0259694	0.0227401	0.022804	0.0231	0.0227153	0.044354	0.0275163	0.0443482	0.025489	0.0361658	0.0592421	0.0540375	0.0254043	0.0328198	0.0418437	0.0253912	0.0159465	0.0330447	0.0411302	0.0255	0.019287	0.0241314	0.0244711	0.0365902	0.0365437	0.05026	0.0291968	0.0282657	0.0207862	0.0246532	0.0247902	0.0191922	0.0314855	0.0237505	0.0288449	0.0581322	0.0494584
2.65609	0.0286758	0.0151523	0.0340073	0.00931448	0.03723	0.0176007	0.0149887	0.0216553	0.0213899	0.0366024	0.0324683	0.0283796	0.019768	0.0182797	0.0179449	0.0179179	0.0228339	0.043234	0.0228951	0.0470191	0.0191002	0.0345376	0.0511944	0.0420942	0.0178151	0.0282802	0.0276308	0.0197199	0.0101666	0.0216908	0.0370827	0.019061	0.0107387	0.0168938	0.0154772	0.0412517	0.0226176	0.037019	0.0295436	0.0244289	0.0197829	0.013622	0.0183975	0.0197488	0.0267393	0.0232187	0.0235782	0.0315739	0.0324867
2.91505	0.0185575	0.0145383	0.0286514	0.00882816	0.0353464	0.0135131	0.0122709	0.0179211	0.017061	0.0253223	0.0212506	0.0188834	0.0146793	0.0149917	0.0138795	0.0153685	0.0235847	0.0414235	0.0196328	0.0466406	0.0150578	0.0323098	0.0384707	0.0311667	0.0128778	0.0248862	0.0173039	0.0158844	0.00713445	0.0156978	0.0315624	0.0149809	0.0072604	0.0128518	0.0102515	0.046165	0.015468	0.0276705	0.0292563	0.0204331	0.0187099	0.0083573	0.014341	0.0193612	0.0222049	0.0233111	0.019777	0.0204682	0.022766
3.19927	0.0106996	0.01346	0.0237058	0.00842356	0.0291025	0.0104795	0.0102517	0.0148793	0.0137082	0.0179044	0.0146367	0.0123287	0.0106386	0.0125693	0.010866	0.0135333	0.0248772	0.0390361	0.0161889	0.0428546	0.0124548	0.0295212	0.0280703	0.023214	0.00938583	0.022267	0.0113009	0.0132524	0.00523609	0.0121866	0.025183	0.0120935	0.00526382	0.0100432	0.00713297	0.0485631	0.0112955	0.0214044	0.0286621	0.0166195	0.0176319	0.00586764	0.011445	0.0180074	0.0185689	0.0230901	0.0170024	0.0145553	0.0173596
3.51119	0.00621767	0.0120794	0.019603	0.00776395	0.0221149	0.00827296	0.00846253	0.0122038	0.0112175	0.0134313	0.0102902	0.00826969	0.00771074	0.0102691	0.00872259	0.0116417	0.0264469	0.0362085	0.0118634	0.03676	0.0107343	0.0260839	0.0211318	0.0179651	0.00696792	0.0199852	0.00785267	0.0114103	0.0039275	0.00995453	0.0195984	0.00999567	0.00400928	0.0079536	0.0052515	0.0463428	0.00850686	0.0171478	0.0279647	0.0132717	0.0166072	0.00457046	0.00933764	0.0160179	0.0158888	0.0217264	0.0149168	0.0108049	0.0137331
3.85353	0.00408689	0.0106059	0.0163379	0.00675388	0.0166251	0.00667517	0.00682386	0.00976391	0.00938131	0.0106512	0.00730159	0.00592145	0.00569303	0.00805618	0.00718182	0.00953761	0.0278792	0.0330854	0.00750821	0.0300557	0.00955729	0.0221011	0.0161702	0.0146233	0.00530274	0.0177238	0.00570952	0.0100818	0.00303426	0.00842106	0.0147776	0.00836563	0.00318555	0.00630823	0.00406925	0.0392495	0.00642057	0.0141724	0.0271415	0.0105186	0.0156825	0.00379932	0.00778232	0.0138565	0.0139203	0.0189017	0.0132597	0.00834693	0.0108224
4.22924	0.00311168	0.00920375	0.0137529	0.00557816	0.0129457	0.00550494	0.00533655	0.00765876	0.00801942	0.00869126	0.00509086	0.00458241	0.00431669	0.00605319	0.00603607	0.00736602	0.0287046	0.0298071	0.00438758	0.023957	0.00871765	0.0180141	0.0125816	0.0124973	0.00412904	0.0153529	0.00436064	0.00907993	0.00242539	0.00726463	0.0111531	0.00703383	0.00262037	0.00500067	0.00321221	0.0302018	0.00487621	0.012025	0.0260231	0.00835743	0.0148891	0.00328707	0.00663692	0.0118655	0.0123639	0.0151273	0.01184	0.00669826	0.00845217
4.64159	0.00263542	0.00796024	0.0116823	0.0044874	0.0106282	0.00463558	0.00414888	0.00597763	0.00699918	0.00717259	0.00354069	0.00380877	0.00338402	0.00443545	0.0051508	0.00552038	0.0285454	0.0264999	0.0026919	0.0189393	0.00807945	0.0143702	0.00992053	0.0110977	0.00333435	0.0129505	0.00349084	0.00827887	0.00200619	0.00638935	0.00857605	0.00592741	0.00221556	0.00397073	0.00255969	0.0225061	0.00375138	0.0104136	0.0244514	0.00671286	0.0142431	0.00291204	0.00579632	0.0101927	0.0109862	0.0114291	0.0105364	0.005552	0.00652693
5.09414	0.00237135	0.00689953	0.0099948	0.00360085	0.00919309	0.00398044	0.00327398	0.00471151	0.00623251	0.00594876	0.00249675	0.00336337	0.0027604	0.00325779	0.00444355	0.00416969	0.0272494	0.0232693	0.00188011	0.015018	0.00754849	0.0114521	0.00793941	0.0101056	0.00280576	0.0106891	0.00290361	0.00759589	0.00171741	0.00570233	0.00679316	0.00501647	0.00191647	0.00317168	0.00204277	0.0169596	0.00293525	0.00914419	0.0224074	0.0054848	0.013747	0.00260477	0.00518057	0.00885123	0.00965563	0.00850789	0.009294	0.00472486	0.00497378
5.59081	0.00219655	0.0060094	0.00859682	0.00292074	0.00831462	0.0034799	0.0026674	0.00379471	0.00566628	0.0049462	0.00179335	0.00310634	0.00235249	0.00243924	0.00386569	0.00327905	0.0249337	0.0201979	0.00149504	0.0120281	0.00706215	0.00924555	0.00646914	0.00930765	0.00245498	0.00870827	0.00248748	0.00697904	0.00152164	0.00513897	0.00554928	0.00428538	0.00169105	0.00255974	0.00163668	0.0132069	0.00234316	0.00808845	0.0200318	0.00457588	0.013392	0.00232439	0.00472592	0.00779527	0.00834109	0.00643404	0.00811391	0.00410506	0.0038142
6.13591	0.00206025	0.00526278	0.00742393	0.0024067	0.00777763	0.00309277	0.00226721	0.00314941	0.00526897	0.00413472	0.00131376	0.00294351	0.00209288	0.00187781	0.00338913	0.00273041	0.0219163	0.0173445	0.00131904	0.00976985	0.00658575	0.00761164	0.00539352	0.00856687	0.00222041	0.00706331	0.002179	0.00639783	0.00139383	0.00465482	0.00466476	0.00371646	0.00151918	0.00209392	0.00132496	0.0106524	0.00191343	0.00716714	0.017549	0.00390353	0.0131614	0.00205853	0.00438107	0.0069649	0.00707747	0.00501865	0.00703019	0.00362112	0.00298538
6.73415	0.0019477	0.00463065	0.00643158	0.00201514	0.00743157	0.00279021	0.00202775	0.00270628	0.00501555	0.00348596	0.0009847	0.00280896	0.00193034	0.0014932	0.00299703	0.00241503	0.018587	0.0147463	0.00126566	0.00806291	0.00610811	0.00639642	0.00462563	0.0078119	0.0020616	0.00574185	0.00194064	0.00583626	0.00131598	0.00422076	0.00402157	0.00328634	0.00138715	0.00173856	0.00109028	0.00886277	0.00160037	0.00633836	0.0151685	0.00340328	0.0130335	0.00181775	0.00410616	0.00630594	0.00591886	0.00406591	0.00608209	0.00322644	0.00240141
7.39072	0.00186081	0.00408803	0.00558768	0.0017113	0.00716738	0.00255109	0.00191879	0.00240938	0.00487389	0.00297002	0.000758738	0.00266203	0.00182451	0.00122827	0.00267778	0.00223748	0.0152919	0.0124217	0.00130405	0.00676144	0.00563395	0.0054701	0.00409405	0.00702586	0.00195139	0.00469863	0.00174958	0.00528796	0.00127417	0.00381935	0.00354087	0.00296824	0.00128469	0.00146476	0.000916579	0.00756484	0.00137024	0.00558614	0.0130287	0.00302733	0.0129839	0.00161919	0.00387231	0.00577551	0.00490492	0.00342738	0.0052945	0.00289101	0.00198273
8.11131	0.00180445	0.00361586	0.00486765	0.00147053	0.00690936	0.00235865	0.00191323	0.00221488	0.00479662	0.00255914	0.000603963	0.00248684	0.00174372	0.00104308	0.00242166	0.00210835	0.0122743	0.0103741	0.00142665	0.0057536	0.00517495	0.00473555	0.00373716	0.00622753	0.00187079	0.00388029	0.00159164	0.00475269	0.00125665	0.00344279	0.00316856	0.0027346	0.00120347	0.00125034	0.000789941	0.0065883	0.00119882	0.00490913	0.0111899	0.00274132	0.0129873	0.00147102	0.0036603	0.00534171	0.00405031	0.00299709	0.00467154	0.00259613	0.00167394
8.90215	0.00177804	0.00320064	0.00425162	0.00127638	0.0066131	0.00219848	0.00197165	0.00208837	0.0047226	0.00223008	0.000498236	0.00228723	0.00166491	0.000909707	0.00221937	0.00195408	0.00966635	0.00859548	0.00162678	0.00495684	0.00474248	0.00412639	0.00350073	0.00544989	0.00180602	0.00323754	0.00145773	0.00423392	0.00125288	0.00308959	0.00286707	0.00255918	0.00113636	0.00107901	0.00069874	0.00582655	0.00107014	0.00431096	0.00965435	0.00252071	0.0130185	0.00136786	0.00345837	0.00498135	0.0033492	0.00269947	0.00419994	0.00233066	0.00143838
9.7701	0.00177028	0.00283317	0.00372293	0.00111804	0.00626248	0.00205773	0.0020301	0.0020025	0.0045899	0.00196496	0.000425888	0.0020772	0.0015741	0.000808796	0.00206154	0.00174079	0.00751046	0.00706958	0.00186006	0.00431216	0.0043437	0.00360165	0.00333723	0.0047235	0.00174688	0.00272939	0.00134173	0.00373704	0.00125312	0.00276123	0.00261054	0.00241831	0.00107728	0.000939201	0.000633447	0.00521256	0.000975358	0.00379399	0.00839062	0.00234768	0.0130535	0.00129231	0.00325987	0.00467748	0.00278411	0.00248049	0.00385547	0.00208826	0.00125182
10.7227	0.00175577	0.00250717	0.00326745	0.000988198	0.00586273	0.00192552	0.00201067	0.0019357	0.00435587	0.00175065	0.000375749	0.00187171	0.00146595	0.000727337	0.00193889	0.00148291	0.00578909	0.00577514	0.00199621	0.0037786	0.00398076	0.00313894	0.00320684	0.00406862	0.001686	0.00232354	0.00123927	0.00326795	0.00124875	0.00245964	0.00238183	0.00229233	0.00102129	0.000822891	0.000586244	0.00470378	0.000911255	0.00335641	0.00735349	0.00220885	0.0130704	0.0012178	0.00306123	0.00441746	0.00233313	0.00230245	0.003609	0.00186551	0.00109829
11.7681	0.00169745	0.00221811	0.00287327	0.000881512	0.00543101	0.00179372	0.00186739	0.00187162	0.00401264	0.00157738	0.000339918	0.00168133	0.0013421	0.000657112	0.00184255	0.0012199	0.00445143	0.00468814	0.00186981	0.00332841	0.00365191	0.0027277	0.00307947	0.00349419	0.00161863	0.0019954	0.00114709	0.00283199	0.00123296	0.00218593	0.00217041	0.00216684	0.000964811	0.000724579	0.000550694	0.00427249	0.000877739	0.00299211	0.00649636	0.0020939	0.0130498	0.00111565	0.00286085	0.00419153	0.00197445	0.00214089	0.00343076	0.00166065	0.000967491
12.9155	0.00156275	0.0019624	0.00253049	0.000793724	0.00498771	0.00165771	0.00162354	0.00179905	0.00358655	0.00143713	0.000312937	0.00151117	0.0012084	0.000593441	0.00176437	0.000985707	0.00343321	0.00378369	0.00148939	0.002943	0.00335317	0.00236341	0.00293649	0.00300036	0.00154249	0.00172658	0.0010627	0.00243327	0.0012015	0.00193996	0.00197065	0.0020335	0.000905749	0.000640479	0.000521556	0.00389982	0.00087451	0.0026918	0.00577798	0.00199469	0.0129758	0.000970917	0.00265861	0.00399193	0.00168855	0.00198214	0.00329336	0.00147277	0.000853017
14.1747	0.00135019	0.0017369	0.00223101	0.000721199	0.00455069	0.0015164	0.00134492	0.00171191	0.00312258	0.0013225	0.000291168	0.00136203	0.00107214	0.000534081	0.00169731	0.000796127	0.00266941	0.00303741	0.00106218	0.00260988	0.00307988	0.00204371	0.0027706	0.00258173	0.00145754	0.00150355	0.00098424	0.00207429	0.00115317	0.00172058	0.0017803	0.00188984	0.000843438	0.000567926	0.000494775	0.00357217	0.000897582	0.00244456	0.0051651	0.00190486	0.0128366	0.000796063	0.00245565	0.00381227	0.00145904	0.00182079	0.0031739	0.0013014	0.000751099
15.5568	0.00109769	0.00153869	0.00196827	0.000660747	0.00413282	0.00137162	0.0010867	0.00160876	0.00266518	0.00122624	0.000272304	0.00123219	0.000939972	0.00047829	0.00163561	0.000652033	0.00210137	0.0024263	0.000734399	0.00232039	0.00282778	0.00176635	0.00258347	0.00223	0.00136527	0.0013164	0.000910405	0.00175589	0.00108955	0.00152592	0.00159924	0.0017379	0.000778374	0.000504975	0.000467544	0.00327931	0.000936719	0.00223931	0.00463265	0.00181962	0.0126248	0.000621595	0.00225415	0.0036472	0.00127273	0.00165694	0.00305522	0.00114615	0.000659633
17.0735	0.000854798	0.00136492	0.00173704	0.000609594	0.00374186	0.00122692	0.000873502	0.00149181	0.00224631	0.00114135	0.000254974	0.00111888	0.000816851	0.0004261	0.00157498	0.000546598	0.00167998	0.00192934	0.000515489	0.00206824	0.00259355	0.00152834	0.00238206	0.00193588	0.00126806	0.00115783	0.000840372	0.00147741	0.00101421	0.00135376	0.00142841	0.00158233	0.000711821	0.000450142	0.000438328	0.00301341	0.000975242	0.00206588	0.00416269	0.0017356	0.0123378	0.000472213	0.00205686	0.00349221	0.00111931	0.00149365	0.00292641	0.00100659	0.000577467
18.7382	0.000651532	0.00121289	0.00153309	0.000565395	0.00338142	0.00108635	0.000707769	0.0013655	0.00188264	0.00106175	0.000238433	0.00101919	0.000705765	0.000377827	0.00151256	0.000470656	0.00136621	0.00152774	0.000382405	0.00184849	0.00237489	0.00132595	0.00217498	0.00169025	0.00116839	0.00102243	0.000773715	0.00123696	0.000931653	0.00120175	0.00126907	0.00142848	0.000645378	0.000402243	0.000406747	0.00276862	0.000993598	0.00191562	0.00374287	0.00165066	0.0119775	0.000364928	0.00186669	0.00334352	0.000990919	0.00133493	0.0027824	0.000882104	0.000503917
20.5651	0.000505077	0.00108001	0.00135302	0.000526247	0.00305224	0.000953539	0.000582253	0.00123518	0.00157842	0.00098296	0.000222335	0.000930559	0.000607975	0.000333777	0.00144677	0.000415553	0.00113032	0.00120508	0.000286533	0.00165702	0.00217041	0.00115501	0.00197008	0.0014847	0.00106851	0.000906107	0.000710303	0.00103173	0.000846292	0.00106763	0.00112234	0.00128108	0.000580631	0.000360304	0.000373287	0.00254078	0.000976376	0.00178174	0.00336485	0.00156375	0.0115496	0.000278953	0.00168622	0.00319812	0.000881712	0.00118448	0.00262288	0.000771913	0.000438468
22.5702	0.000388909	0.00096387	0.00119399	0.000490685	0.00275332	0.000831143	0.000487494	0.00110595	0.00132999	0.00090261	0.000206574	0.000850927	0.000523459	0.000294116	0.00137715	0.000374297	0.000950346	0.000947194	0.00021941	0.00149022	0.00197937	0.00101119	0.00177327	0.0013119	0.00097027	0.00080567	0.000650191	0.000858373	0.000761858	0.000949256	0.000988884	0.00114352	0.000518916	0.000323501	0.000338936	0.00232716	0.000918933	0.00165922	0.00302297	0.00147465	0.011063	0.000214979	0.00151743	0.00305373	0.000787382	0.00104501	0.00245077	0.000675055	0.000380624
24.7708	0.000301581	0.000862282	0.00105362	0.000457649	0.00248272	0.000720709	0.000415012	0.000982015	0.00112975	0.000820397	0.000191175	0.000778723	0.000451358	0.000258835	0.00130403	0.000341804	0.000810485	0.000742073	0.000171996	0.00134488	0.00180138	0.000890326	0.00158838	0.00116566	0.000875115	0.000718591	0.000593524	0.000713257	0.000681108	0.000844722	0.000868905	0.00101779	0.000461212	0.00029113	0.00030483	0.00212619	0.000828689	0.00154463	0.0027133	0.00138376	0.0105285	0.000168003	0.00136159	0.00290881	0.000704805	0.000918135	0.00227074	0.000590436	0.000329846
27.1859	0.000236405	0.000773268	0.000929851	0.000426429	0.00223815	0.000622784	0.000358243	0.000866349	0.000968968	0.000737591	0.000176225	0.000712788	0.00039036	0.000227765	0.00122828	0.00031468	0.000699559	0.000579634	0.000138024	0.00121806	0.00163622	0.000788596	0.00141749	0.00104086	0.000784216	0.000642811	0.000540457	0.000592712	0.000605822	0.000752317	0.000762132	0.000904644	0.000408126	0.000262585	0.000271995	0.00193715	0.000720257	0.00143585	0.00243288	0.00129192	0.00995843	0.000133856	0.00121924	0.00276257	0.000631728	0.000804464	0.00208795	0.000516883	0.000285545
29.8365	0.000188384	0.000695085	0.000820856	0.000396596	0.00201723	0.000537139	0.00031251	0.000760755	0.000839321	0.000656279	0.000161827	0.000652282	0.000338977	0.000200622	0.00115103	0.000290835	0.000609755	0.00045151	0.000112925	0.00110713	0.00148365	0.00070263	0.00126139	0.000933381	0.000698512	0.000576622	0.000491108	0.000493209	0.000536963	0.000670546	0.000667922	0.000803962	0.000359939	0.000237342	0.000241207	0.00175984	0.000608656	0.00133175	0.00217931	0.00120014	0.00936496	0.00010863	0.00109036	0.00261485	0.000566523	0.000703825	0.00190719	0.000453196	0.0002471
32.7455	0.000152805	0.000626213	0.000724999	0.000367934	0.00181772	0.000463022	0.00027466	0.000666028	0.000733712	0.000578648	0.000148085	0.000596588	0.000295725	0.000177045	0.00107353	0.000269082	0.000535644	0.000350821	9.38232e-05	0.00100974	0.00134336	0.000629544	0.00112005	0.000839965	0.000618734	0.0005186	0.000445524	0.000411474	0.000474873	0.000598103	0.000585375	0.000715025	0.000316667	0.00021495	0.000212961	0.00159432	0.000504905	0.00123185	0.0019505	0.00110952	0.00875994	8.95357e-05	0.00097445	0.00246607	0.000508006	0.000615517	0.0017324	0.000398195	0.000213884
35.9381	0.0001259	0.000565342	0.000640797	0.000340375	0.00163755	0.000399372	0.000242632	0.000582202	0.000646467	0.000506489	0.000135078	0.000545248	0.000259241	0.000156643	0.000996922	0.000248801	0.00047344	0.000271957	7.89229e-05	0.000923839	0.00121492	0.000566929	0.00099292	0.000758052	0.000545396	0.000467541	0.000403677	0.000344563	0.000419467	0.000533855	0.000513431	0.000636806	0.000278144	0.000195024	0.000187491	0.00144072	0.000414957	0.00113609	0.00174449	0.0010211	0.00815411	7.47467e-05	0.000870731	0.00231704	0.000455301	0.000538524	0.00156647	0.00035076	0.000185283
39.4421	0.000105111	0.000511354	0.000566906	0.00031394	0.00147486	0.000344998	0.000215088	0.000508786	0.000573266	0.000440974	0.000122866	0.000497904	0.000228329	0.000139018	0.000922229	0.000229702	0.000420482	0.000210376	6.70636e-05	0.000847639	0.00109777	0.000512814	0.000879185	0.000685653	0.000478784	0.000422434	0.000365466	0.000289891	0.000370394	0.00047682	0.000450967	0.000568149	0.000244079	0.000177232	0.000164827	0.00129907	0.000340654	0.00104465	0.00155943	0.000935806	0.0075568	6.30617e-05	0.000778243	0.00216884	0.00040774	0.000471682	0.00141134	0.000309856	0.000160717
43.2876	8.87328e-05	0.000463298	0.000502106	0.000288696	0.00132799	0.000298696	0.000191144	0.00044497	0.00051092	0.000382641	0.000111484	0.000454267	0.000201979	0.000123792	0.000850267	0.00021167	0.000374871	0.000162424	5.74676e-05	0.000779623	0.000991289	0.000465612	0.000777875	0.000621229	0.000418954	0.000382427	0.000330731	0.000245235	0.000327157	0.000426142	0.000396861	0.000507896	0.000214109	0.000161294	0.000144859	0.00116926	0.000281249	0.00095778	0.00139353	0.000854379	0.0069757	5.36714e-05	0.000695952	0.00202269	0.000364798	0.000413793	0.00126806	0.000274549	0.00013965
47.5081	7.56099e-05	0.000420375	0.000445296	0.000264724	0.00119545	0.000259322	0.000170187	0.000389779	0.000457117	0.000331504	0.000100944	0.000414089	0.000179361	0.000110616	0.00078165	0.000194669	0.000335223	0.00012518	4.9595e-05	0.000718515	0.000894761	0.000424062	0.000687965	0.000563579	0.000365755	0.000346802	0.000299267	0.000208717	0.000289191	0.000381078	0.000350044	0.000454954	0.000187844	0.00014697	0.00012739	0.00105098	0.000234699	0.000875745	0.00124508	0.000777388	0.00641687	4.60157e-05	0.000622821	0.0018798	0.000326042	0.000363706	0.00113701	0.000244011	0.000121599
52.1401	6.49393e-05	0.000381908	0.000395485	0.000242097	0.0010759	0.000225838	0.000151768	0.000342191	0.000410188	0.0002872	9.12388e-05	0.000377147	0.000159803	9.91812e-05	0.000716801	0.000178693	0.000300505	9.63193e-05	4.30606e-05	0.000663256	0.000807455	0.000387169	0.000608419	0.000511762	0.000318867	0.00031496	0.000270843	0.000178777	0.00025592	0.00034098	0.000309526	0.000408341	0.000164888	0.000134056	0.000112177	0.000943765	0.000198555	0.000798737	0.00111245	0.000705215	0.00588484	3.96976e-05	0.000557856	0.0017413	0.000291102	0.000320356	0.00101807	0.000217523	0.000106132
57.2237	5.61501e-05	0.000347328	0.00035179	0.00022087	0.000968126	0.000197328	0.000135534	0.000301208	0.000368917	0.000249141	8.23477e-05	0.000343236	0.000142774	8.92172e-05	0.00065597	0.000163742	0.000269927	7.40026e-05	3.75825e-05	0.000612979	0.000728627	0.000354154	0.000538226	0.00046503	0.000277846	0.000286396	0.000245211	0.00015413	0.000226789	0.000305278	0.000274419	0.000367191	0.00014486	0.000122381	9.89623e-05	0.000847019	0.000170465	0.00072687	0.000994105	0.000638076	0.00538266	3.44285e-05	0.000500135	0.00160816	0.000259653	0.000282793	0.000910767	0.000194467	9.287e-05
62.8029	4.88282e-05	0.000316156	0.000313428	0.000201072	0.000871037	0.000172999	0.000121199	0.000265899	0.000332399	0.000216623	7.4237e-05	0.000312158	0.000127849	8.04938e-05	0.000599268	0.000149808	0.000242872	5.67795e-05	3.29501e-05	0.000566979	0.000657546	0.000324409	0.000476415	0.000422777	0.000242174	0.000260689	0.000222123	0.000133734	0.000201286	0.000273473	0.000243938	0.000330757	0.000127404	0.000111799	8.74938e-05	0.000760036	0.000148416	0.000660167	0.000888601	0.000576044	0.0049122	2.99953e-05	0.000448816	0.00148115	0.000231395	0.000250183	0.000814405	0.000174318	8.14842e-05
68.9261	4.2668e-05	0.000287988	0.000279708	0.000182707	0.000783631	0.000152181	0.000108521	0.000235432	0.000299941	0.000188922	6.68654e-05	0.000283724	0.000114694	7.28167e-05	0.000546695	0.000136874	0.000218842	4.35108e-05	2.90033e-05	0.000524689	0.00059351	0.000297456	0.000422069	0.000384501	0.000211295	0.000237487	0.000201336	0.000116752	0.000178946	0.000245126	0.000217403	0.000298401	0.000112197	0.000102185	7.7536e-05	0.000682058	0.000130808	0.000598568	0.000794612	0.000519071	0.00447426	2.62366e-05	0.000403149	0.00136086	0.000206055	0.000221805	0.000728165	0.000156637	7.16913e-05
75.6463	3.74401e-05	0.000262479	0.000250026	0.000165754	0.000704993	0.000134305	9.72924e-05	0.000209073	0.000270995	0.000165342	6.01861e-05	0.000257749	0.000103044	6.60244e-05	0.000498164	0.000124912	0.000197434	3.3305e-05	2.56182e-05	0.000485653	0.000535855	0.000272921	0.000374338	0.000349783	0.00018465	0.000216491	0.000182621	0.000102514	0.000159354	0.000219849	0.00019423	0.000269582	9.89463e-05	9.34354e-05	6.88769e-05	0.000612303	0.000116439	0.000541939	0.000710915	0.000467014	0.00406885	2.30291e-05	0.000362465	0.00124766	0.000183375	0.000197046	0.000651177	0.000141055	6.32496e-05
83.0218	3.297e-05	0.000239337	0.000223853	0.000150175	0.000634285	0.0001189	8.73322e-05	0.000186193	0.000245113	0.000145246	5.41498e-05	0.000234056	9.26873e-05	5.99834e-05	0.000453527	0.000113883	0.000178311	2.54667e-05	2.26979e-05	0.000449505	0.000483961	0.000250507	0.000332439	0.000318261	0.000161702	0.00019745	0.000165763	9.04849e-05	0.000142146	0.000197298	0.000173922	0.000243841	8.73941e-05	8.54578e-05	6.13298e-05	0.000549996	0.000104438	0.000490086	0.0006364	0.000419663	0.00369531	2.02763e-05	0.000326177	0.00114174	0.000163114	0.000175383	0.000582566	0.000127265	5.59532e-05
91.1163	2.91231e-05	0.00021831	0.000200732	0.000135912	0.000570742	0.000105572	7.84847e-05	0.000166257	0.000221922	0.000128076	4.87061e-05	0.000212472	8.3451e-05	5.4584e-05	0.000412594	0.000103744	0.000161192	1.94548e-05	2.01656e-05	0.000415951	0.000437258	0.000229973	0.000295661	0.000289623	0.000141954	0.000180152	0.000150566	8.0245e-05	0.000127007	0.00017717	0.000156063	0.000220791	7.73134e-05	7.81749e-05	5.47334e-05	0.000494388	9.41936e-05	0.000442773	0.000570059	0.000376757	0.0033525	1.7902e-05	0.00029377	0.00104313	0.000145045	0.000156377	0.000521483	0.000115013	4.96286e-05
100	2.57938e-05	0.00019918	0.000180266	0.000122898	0.000513661	9.39948e-05	7.06136e-05	0.000148817	0.000201105	0.000113354	4.38051e-05	0.000192833	7.51943e-05	4.97361e-05	0.00037515	9.44444e-05	0.000145838	1.48492e-05	1.79594e-05	0.000384752	0.000395223	0.000211125	0.000263363	0.000263592	0.000124951	0.000164412	0.000136854	7.14607e-05	0.000113661	0.000159194	0.0001403	0.000200103	6.85062e-05	7.15188e-05	4.89498e-05	0.000444774	8.52838e-05	0.000399732	0.000510983	0.000338005	0.00303894	1.58452e-05	0.000264793	0.000951744	0.000128956	0.000139656	0.000467133	0.000104087	4.41292e-05
[truncated: 316 more columns]

## Sheet: Supplement 1C H2B
diff_coef_value	Cell1	Cell2	Cell3	Cell4	Cell5	Cell6	Cell7	Cell8	Cell9	Cell10	Cell11	Cell12	Cell13	Cell14	Cell15	Cell16	Cell17	Cell18	Cell19	Cell20	Cell21	Cell22	Cell23	Cell24	Cell25	Cell26	Cell27	Cell28	Cell29	Cell30	Cell31	Cell32	Cell33	Cell34	Cell35	Cell36	Cell37	Cell38	Cell39	Cell40	Cell41	Cell42	Cell43	Cell44	Cell45	Cell46	Cell47	Cell48	Cell49
0.01	0.613543	0.575426	0.422736	0.549855	0.599185	0.591607	0.555717	0.534227	0.579441	0.453889	0.533201	0.105194	0.534426	0.619331	0.530654	0.26948	0.685861	0.608577	0.640558	0.443681	0.6627	0.546717	0.35596	0.454374	0.345308	0.382555	0.526013	0.667908	0.517264	0.564354	0.377753	0.60753	0.647482	0.561439	0.737446	0.524084	0.461392	0.590155	0.637213	0.598308	0.552573	0.469442	0.648961	0.520149	0.624953	0.570124	0.0749872	0.0421074	0.558366
0.010975	0.138203	0.123168	0.13772	0.0850653	0.130985	0.113987	0.122201	0.0950454	0.0931101	0.127334	0.132883	0.0929154	0.122636	0.0730806	0.114472	0.132049	0.120398	0.101267	0.129974	0.092287	0.105304	0.0974277	0.112831	0.130763	0.0972474	0.147737	0.110799	0.0768953	0.137429	0.113024	0.166418	0.116604	0.108255	0.120133	0.107391	0.118072	0.129812	0.106844	0.116741	0.0857047	0.132499	0.135289	0.105581	0.0884434	0.117016	0.127678	0.0596622	0.0404332	0.133455
0.012045	0.0520017	0.0427404	0.0662074	0.0363188	0.0449297	0.0392366	0.0521935	0.0448687	0.0345035	0.0584468	0.0563731	0.0814443	0.0550638	0.0257895	0.0527953	0.0886839	0.0363663	0.0384124	0.0436968	0.0469966	0.0363409	0.0511003	0.0680615	0.0627361	0.0474835	0.0700485	0.0413604	0.0254868	0.0584573	0.0442462	0.0831728	0.0392166	0.0311662	0.0443501	0.0309488	0.0414897	0.0544935	0.0445704	0.0409137	0.0316559	0.047997	0.0579919	0.0332509	0.0442495	0.0395731	0.04523	0.0514481	0.0388396	0.04385
0.0132194	0.0253953	0.0227649	0.0409157	0.0235415	0.0216171	0.0202938	0.0307089	0.0277759	0.0193251	0.0337476	0.0307921	0.0708329	0.0319943	0.0166625	0.033767	0.0674697	0.0156677	0.0221462	0.0194932	0.0336082	0.0191721	0.0347182	0.0500206	0.0376602	0.0318948	0.040352	0.0214383	0.0151093	0.0309525	0.0260315	0.04924	0.020022	0.0158821	0.0255325	0.0127252	0.0227517	0.0311856	0.0273335	0.0204279	0.0195462	0.0253939	0.032125	0.0193265	0.032716	0.0227335	0.0228575	0.0459873	0.037324	0.0232138
0.0145083	0.0147898	0.0156332	0.0291503	0.0188041	0.013252	0.0132591	0.0212629	0.019224	0.014062	0.0223134	0.0193269	0.0612392	0.0210236	0.0133127	0.0249303	0.0538652	0.00877243	0.0157771	0.0111464	0.0268965	0.0128406	0.0254355	0.0390583	0.0254372	0.0250903	0.0265719	0.0138153	0.0109749	0.0191444	0.0187233	0.0340568	0.0136486	0.0109738	0.0184591	0.00683373	0.0164896	0.0218389	0.0201131	0.012784	0.0151086	0.0172974	0.0214689	0.0145908	0.0267015	0.0166594	0.014601	0.042131	0.0358833	0.0167881
0.0159228	0.00985837	0.0122188	0.0226587	0.0164621	0.00951832	0.00993044	0.0161754	0.0144322	0.0119091	0.0165265	0.0134565	0.0528818	0.0151811	0.0115499	0.0199026	0.0444025	0.00592481	0.0126534	0.00777284	0.0228224	0.00987406	0.019516	0.0313628	0.0187114	0.021393	0.0191039	0.010362	0.00876273	0.0134882	0.014872	0.0261579	0.0109419	0.00864118	0.0148483	0.0045135	0.0137104	0.0172556	0.0162592	0.0093418	0.0128147	0.013555	0.0165516	0.0120391	0.0225421	0.0134464	0.0107844	0.0387153	0.034515	0.0137065
0.0174753	0.00730889	0.0102308	0.0186332	0.0150097	0.00754094	0.0080873	0.0130508	0.011588	0.0108687	0.0134536	0.0101944	0.0462504	0.0118738	0.0104179	0.0166925	0.0374664	0.00452845	0.0108596	0.00613377	0.0201108	0.00820914	0.0155407	0.0256823	0.0147312	0.0189195	0.0146714	0.0085734	0.00741632	0.0105148	0.0125018	0.02133	0.00950194	0.00725961	0.0126003	0.00342769	0.0121745	0.0146458	0.0137933	0.00756053	0.011338	0.0114749	0.0141296	0.0103173	0.0193157	0.0113333	0.00870895	0.0357322	0.0332165	0.0117921
0.0191791	0.00588408	0.00888157	0.0159305	0.0139769	0.00634859	0.00692374	0.0109501	0.00986472	0.0103217	0.0117625	0.00826597	0.0404101	0.00987521	0.00964464	0.0143707	0.0321811	0.00374735	0.00971761	0.00518529	0.0179771	0.00715617	0.0127973	0.0213928	0.012255	0.0171359	0.011886	0.00754932	0.00651962	0.0087779	0.0109236	0.0180005	0.0085834	0.00632465	0.0110045	0.00283001	0.0112108	0.0129943	0.0119946	0.00652686	0.0102987	0.0101801	0.0128977	0.00904912	0.0167586	0.00981171	0.00742121	0.0330609	0.0319846	0.0104155
0.021049	0.00502533	0.007891	0.013916	0.0131966	0.00556518	0.00613247	0.00945984	0.00884329	0.0100421	0.0107681	0.00707198	0.0355646	0.00861704	0.00909179	0.0125842	0.0279959	0.00326282	0.00893249	0.0045544	0.0163021	0.0064338	0.0109024	0.018101	0.0106518	0.0157814	0.010073	0.00690011	0.00589999	0.00763707	0.00981517	0.0155809	0.00794496	0.00565028	0.00981113	0.00245875	0.0105674	0.0118728	0.0105721	0.00588021	0.00953991	0.00936	0.0122712	0.00800404	0.014685	0.00865788	0.00655467	0.0306392	0.0308161	0.00932956
0.0231013	0.00448085	0.00714614	0.0123743	0.0125889	0.00500215	0.00556941	0.00832834	0.0083125	0.0099244	0.0101542	0.00631252	0.0315538	0.00777324	0.0087224	0.0111885	0.0245772	0.00293877	0.00837174	0.00409385	0.0149447	0.00590984	0.00962099	0.0155423	0.00958207	0.0148062	0.00883911	0.00647135	0.00546005	0.0068216	0.00899781	0.0137176	0.00747857	0.00512781	0.0088831	0.0022004	0.0100864	0.0110659	0.00939677	0.00545498	0.00898258	0.00880885	0.0119587	0.00714091	0.0129781	0.00774582	0.00593738	0.0284355	0.0297064	0.00841544
0.0253536	0.00412253	0.0065338	0.0110857	0.0121048	0.00458003	0.00517605	0.00745736	0.00818333	0.00988886	0.00975052	0.00582507	0.028239	0.00718206	0.00840788	0.00998097	0.0217182	0.00271157	0.00793054	0.00373672	0.0138212	0.0055222	0.00879727	0.0135808	0.00885484	0.0139752	0.00795667	0.00618324	0.00514137	0.00621016	0.00836436	0.0122924	0.00713088	0.00471687	0.00814258	0.0020127	0.00970342	0.0104611	0.00841008	0.00516872	0.00858107	0.00843676	0.0117958	0.00641232	0.0115603	0.00697038	0.0054982	0.0264292	0.0286505	0.00764677
0.0278256	0.00388294	0.0060585	0.00999325	0.0117029	0.00425163	0.004889	0.00674371	0.00844394	0.00984848	0.00946439	0.00551122	0.0255098	0.00678931	0.00815344	0.00894502	0.0192843	0.00254896	0.00756974	0.00346026	0.0128775	0.00522078	0.00832134	0.0119724	0.00836004	0.0133119	0.0073161	0.00598757	0.00489963	0.00570411	0.00784299	0.0110404	0.00688902	0.00439404	0.00753939	0.00187274	0.00936753	0.00997284	0.0075896	0.0049756	0.00830495	0.00819712	0.0116726	0.00578921	0.0103744	0.00632012	0.00515905	0.0246041	0.0276417	0.00698766
0.0305386	0.00371966	0.00565209	0.00904631	0.0113387	0.00399136	0.00471153	0.0061551	0.00911445	0.00971407	0.00924166	0.00532287	0.0232762	0.00652438	0.00793597	0.00804367	0.0171843	0.00243363	0.00725302	0.00322061	0.0120762	0.00498169	0.00810649	0.0106723	0.00803249	0.0127862	0.00684674	0.00586694	0.00471062	0.00528084	0.00738717	0.00998733	0.0066971	0.00414073	0.00707483	0.00176777	0.00904159	0.00956641	0.00690585	0.00484854	0.00813268	0.00803558	0.0115154	0.00525141	0.00937581	0.00576914	0.00490353	0.0229466	0.026672	0.0064139
0.033516	0.00362041	0.00533129	0.00822127	0.0109595	0.00378797	0.00460739	0.00566227	0.0101489	0.00941144	0.00904625	0.00522225	0.0214569	0.00635683	0.00773857	0.00730426	0.0153534	0.00235697	0.00695159	0.00302906	0.0113881	0.00479049	0.00807538	0.00959529	0.00783128	0.0123761	0.00650595	0.00580884	0.0045071	0.00492025	0.00697322	0.00908852	0.00655658	0.00394355	0.00669073	0.00168982	0.00870003	0.00923236	0.00635268	0.00476747	0.00806201	0.00789426	0.0112728	0.00478354	0.00852988	0.00532281	0.00470927	0.0214434	0.0257322	0.00590907
0.0367838	0.00356633	0.00507148	0.00751446	0.010515	0.00362045	0.00458217	0.00524695	0.0112699	0.00891764	0.00885484	0.00517926	0.0199818	0.0062798	0.00754901	0.00661033	0.013745	0.00231514	0.00664339	0.00285467	0.0107885	0.00464528	0.00812023	0.00873059	0.00773338	0.012063	0.0062815	0.00579906	0.00427397	0.00461267	0.00656819	0.00831298	0.00645452	0.00379241	0.00633174	0.00163036	0.00832901	0.00898328	0.00591349	0.00471489	0.00805554	0.00772311	0.0109388	0.00437416	0.00780931	0.00492624	0.004574	0.0200817	0.024812	0.00546053
0.0403702	0.00354399	0.00485639	0.00689841	0.00997229	0.00348975	0.00463451	0.00491014	0.0119091	0.00826852	0.00864974	0.00516686	0.0187843	0.00629035	0.0073581	0.0059945	0.0123238	0.00230324	0.0062671	0.00270607	0.010255	0.00451879	0.00814099	0.00806995	0.00772061	0.0118284	0.0061274	0.00583214	0.00400592	0.00435393	0.00616163	0.00763825	0.0063772	0.00367927	0.00601683	0.00159121	0.00792569	0.00882522	0.00555746	0.00467006	0.00812136	0.00751317	0.0105036	0.00401459	0.00719189	0.0046105	0.004455	0.0188485	0.0239013	0.00505761
0.0443062	0.00353375	0.00468954	0.00631811	0.00933518	0.00339288	0.00476499	0.00461303	0.0114828	0.00755919	0.00841874	0.0051577	0.0177927	0.00639457	0.0071584	0.00544866	0.011063	0.00231309	0.00580493	0.00258291	0.00976741	0.00440506	0.00798885	0.00752559	0.00776341	0.0116523	0.00603968	0.00590322	0.00372847	0.00414422	0.00576017	0.0070469	0.00630912	0.00359753	0.00573437	0.00156782	0.00749868	0.00872286	0.00524425	0.00461068	0.00824824	0.00725085	0.00997926	0.00369849	0.00665921	0.00432789	0.00435441	0.0177311	0.022991	0.00469233
0.048626	0.00352927	0.00456746	0.00579979	0.00864618	0.00332209	0.00497381	0.00435855	0.0101374	0.006841	0.00815548	0.00512499	0.0169252	0.00661248	0.00694333	0.0049659	0.00994139	0.00234901	0.00525914	0.0024953	0.00930872	0.00432042	0.00756291	0.00710594	0.00779549	0.0115122	0.00599294	0.00606488	0.00347599	0.00399908	0.0053413	0.00652579	0.00623305	0.00354805	0.00547497	0.00155845	0.00706672	0.00859275	0.00494615	0.00453295	0.00840316	0.0069893	0.00934603	0.00342142	0.00619589	0.00409411	0.00426436	0.0167176	0.0220744	0.00435905
0.053367	0.00350175	0.00448867	0.00533871	0.00796237	0.00330117	0.00525929	0.00413726	0.00877766	0.00618007	0.0078588	0.00504476	0.0160934	0.00698022	0.00670682	0.00453981	0.008942	0.002412	0.00466432	0.00242008	0.00886717	0.00424936	0.00685169	0.00681	0.00770307	0.0113836	0.00600689	0.00625889	0.0033246	0.00389183	0.00492743	0.00606446	0.00613131	0.00351757	0.00523073	0.00156877	0.00665629	0.00829921	0.00471581	0.00442353	0.00848056	0.00673318	0.00865492	0.00318042	0.00578899	0.00390518	0.00418018	0.0157973	0.0211485	0.0040538
0.0585702	0.00343255	0.00445375	0.00493109	0.00732671	0.00331076	0.00559871	0.00395447	0.00806723	0.00559308	0.00753125	0.00489995	0.0152181	0.00753495	0.00644374	0.00416485	0.00805037	0.00250393	0.00409114	0.00236656	0.00843737	0.00417366	0.00595266	0.00667687	0.00737219	0.0112409	0.00607235	0.0062676	0.00328551	0.00383832	0.00453677	0.00565391	0.0059877	0.00348732	0.00499466	0.001595	0.00629489	0.00778807	0.00466146	0.00429386	0.00829994	0.00645817	0.00807272	0.00297358	0.0054277	0.00375708	0.00408695	0.0149608	0.020215	0.00377378
0.0642807	0.0033172	0.00446537	0.00457389	0.00675374	0.00336073	0.00591699	0.00378786	0.00773408	0.00507935	0.00717927	0.00467867	0.0142507	0.00823547	0.00615284	0.00383449	0.00725416	0.00261923	0.00357081	0.00233259	0.00802058	0.00405449	0.00504264	0.00663877	0.00680531	0.0110614	0.00613727	0.00589443	0.00336636	0.00383552	0.00418578	0.00528608	0.00581122	0.0034738	0.00476092	0.00164854	0.0059985	0.00711252	0.00498017	0.00410804	0.00771351	0.006123	0.00767879	0.00279989	0.00510337	0.00364547	0.00401657	0.0142009	0.0192802	0.00351708
0.070548	0.00317218	0.00452743	0.00426431	0.00625729	0.00345836	0.00616478	0.0036136	0.00707915	0.0046353	0.00680974	0.0043643	0.0131838	0.00872115	0.0058391	0.00354136	0.00654237	0.00277596	0.00314078	0.00231562	0.00762286	0.00385017	0.00429214	0.00674665	0.00610545	0.0108297	0.00616124	0.00534556	0.0034784	0.00386781	0.00388117	0.00495328	0.00556597	0.00346924	0.00452462	0.00173511	0.00575144	0.00641026	0.00563972	0.00380712	0.00691029	0.00573058	0.00693052	0.0026589	0.00480944	0.00356438	0.00395814	0.0135119	0.0183542	0.00328225
0.0774264	0.00301298	0.00463975	0.00399958	0.00578363	0.00359101	0.00624462	0.00343778	0.00605348	0.00426109	0.00644354	0.00396838	0.0120444	0.00840444	0.00551431	0.00327833	0.00590524	0.0029004	0.00280275	0.00231285	0.0072525	0.00357069	0.00375135	0.00670049	0.00540588	0.0105415	0.00607995	0.0048627	0.00352453	0.00390558	0.00362083	0.00464788	0.00527762	0.0034798	0.0042827	0.00186313	0.00549202	0.00580866	0.00574713	0.00341203	0.00615505	0.00534273	0.00563682	0.00255044	0.00454132	0.00350487	0.00391151	0.0128895	0.0174502	0.00306802
0.0849753	0.00283287	0.00475738	0.00377634	0.00532111	0.00380828	0.00611614	0.00325686	0.00518839	0.00397656	0.00605572	0.00354231	0.0108746	0.00716067	0.00519315	0.00303917	0.00533417	0.0028849	0.00255864	0.00232131	0.00691739	0.00324398	0.00340113	0.0063866	0.00477753	0.0102058	0.00585406	0.00450255	0.00342345	0.00392757	0.00342206	0.00436276	0.00496173	0.00349175	0.00403379	0.00204163	0.00516164	0.00535847	0.00471725	0.00300761	0.00550123	0.00494474	0.00448321	0.00247429	0.00429623	0.00345339	0.00387214	0.01233	0.0165822	0.00287334
0.0932603	0.00265367	0.00483188	0.00359012	0.00485429	0.0040102	0.00577098	0.00307207	0.00482277	0.00375495	0.00566337	0.00314444	0.0097157	0.00575905	0.00488824	0.00281914	0.00482184	0.0027432	0.00236959	0.00233749	0.00662216	0.00292693	0.00316997	0.00593871	0.00425033	0.00984148	0.00553415	0.00424813	0.00321795	0.00395015	0.00323292	0.00409196	0.00463501	0.00350724	0.00377784	0.00226745	0.00475403	0.00505297	0.00358191	0.00268702	0.00481217	0.0045358	0.00373248	0.00242979	0.00407289	0.00338417	0.00383755	0.0118302	0.0157635	0.00269741
0.102353	0.00246486	0.00469844	0.0034357	0.00438916	0.00389298	0.00523794	0.00288944	0.00496933	0.00361114	0.00527866	0.00279824	0.00860083	0.00469274	0.00460775	0.00261531	0.00436225	0.00256402	0.00224111	0.00235739	0.00636524	0.00263978	0.00301714	0.00552919	0.00383519	0.00947115	0.005149	0.00404186	0.0030459	0.00399955	0.00306815	0.00383128	0.00431221	0.00352677	0.00351656	0.00251008	0.00434321	0.00482919	0.00290316	0.00243415	0.00414198	0.00414258	0.0032613	0.00241541	0.00387106	0.003297	0.00383155	0.0113868	0.0150054	0.00253979
0.112332	0.00227307	0.00437956	0.00330726	0.0039439	0.00346905	0.0045978	0.0027181	0.00502855	0.0035378	0.00489488	0.00252851	0.00755385	0.00386524	0.00435578	0.0024264	0.00395055	0.00240592	0.00217772	0.00237699	0.00613561	0.00241501	0.00289829	0.00520606	0.00353725	0.00911337	0.00475697	0.00390002	0.00301727	0.00413007	0.00292104	0.00357768	0.00400363	0.00355278	0.00325347	0.0027172	0.00395714	0.00467589	0.00250706	0.00224301	0.00358209	0.00376117	0.0029566	0.00242821	0.00369116	0.003159	0.00384243	0.0109965	0.0143159	0.00240051
0.123285	0.00208609	0.00399415	0.00319866	0.00352192	0.00311494	0.00399826	0.00256722	0.00421457	0.00353565	0.00449799	0.00234945	0.00659111	0.0031919	0.00413391	0.00225213	0.00358273	0.00228523	0.00218449	0.00239334	0.00591167	0.00219345	0.00280736	0.00492446	0.00334194	0.00877732	0.00442769	0.00382348	0.00310231	0.00433574	0.00278575	0.00332855	0.00374779	0.00358504	0.00299303	0.00282074	0.00359746	0.0046769	0.0022404	0.00208932	0.00314937	0.00342243	0.00273607	0.00246333	0.00353381	0.00297816	0.00388432	0.0106567	0.0136989	0.00228004
0.135305	0.00189419	0.00366396	0.0031037	0.00312763	0.00290123	0.00352821	0.00244344	0.00340356	0.00356749	0.00412336	0.00225006	0.00572288	0.00267414	0.00394242	0.00209256	0.0032553	0.00219165	0.00224014	0.0024061	0.00566481	0.0020039	0.00273135	0.00461082	0.00324828	0.00846375	0.00415667	0.00383611	0.00302597	0.00462335	0.00265949	0.00308235	0.00348505	0.00362274	0.00273958	0.00281865	0.00328238	0.00480344	0.0020547	0.00198804	0.00283153	0.00307642	0.00259489	0.00251348	0.00339956	0.00276539	0.00399478	0.0103663	0.0131534	0.00217943
0.148497	0.00171798	0.00341063	0.00301624	0.00277103	0.00279661	0.00316649	0.0023499	0.00295528	0.0035638	0.00374768	0.00222644	0.004954	0.00229204	0.00378131	0.00194739	0.00296489	0.00212807	0.00226033	0.00241749	0.005365	0.00184788	0.00276431	0.00427185	0.00323082	0.00816954	0.00395111	0.00394335	0.00272801	0.00498006	0.00255432	0.0028407	0.00323582	0.0036519	0.00249737	0.00272879	0.00301303	0.00452408	0.00190848	0.00194681	0.00259822	0.00273145	0.00250061	0.00256861	0.00328862	0.00253274	0.00411831	0.0101259	0.0126736	0.00210033
0.162975	0.00154042	0.00322128	0.00293057	0.00246715	0.00277263	0.00288263	0.00228707	0.00270236	0.00349058	0.00340087	0.00224075	0.00428457	0.00202362	0.00364729	0.00181591	0.00270805	0.00209182	0.00214951	0.00243127	0.00498647	0.00172545	0.00305418	0.00391766	0.00328246	0.00788709	0.0038029	0.00415637	0.00240114	0.00521215	0.00244616	0.00260963	0.0029991	0.00365777	0.00227033	0.0025535	0.0027883	0.00370877	0.0017997	0.00196933	0.00242374	0.00240429	0.00245741	0.00261614	0.00320068	0.00229227	0.00427194	0.0099382	0.0122479	0.00204502
0.178865	0.00137799	0.00307471	0.00284189	0.00222813	0.00282612	0.00267897	0.00225362	0.00254188	0.00332832	0.00304982	0.00220986	0.00371064	0.00184332	0.00353043	0.00169707	0.00248122	0.00207657	0.00196607	0.00245085	0.00452475	0.00163578	0.00361582	0.00364763	0.00340522	0.00759519	0.00370512	0.00457573	0.00216004	0.00498582	0.00234312	0.00239784	0.00277151	0.00362201	0.0020614	0.00232468	0.00260476	0.00302783	0.00172524	0.00205764	0.00228645	0.00210889	0.00244186	0.00264175	0.00313496	0.00205895	0.00444385	0.00980688	0.01186	0.00201636
0.196304	0.00123816	0.00295502	0.00274713	0.00206022	0.00298165	0.00254881	0.00224576	0.00244207	0.0030605	0.00270893	0.00210686	0.00322509	0.00173058	0.00341535	0.00158977	0.00228085	0.00206964	0.00182133	0.00247816	0.00401575	0.0015779	0.00339903	0.00349479	0.00355181	0.00725002	0.00365359	0.00534227	0.00193595	0.00445535	0.00224451	0.00221378	0.00255133	0.00354011	0.00187182	0.00208899	0.00245733	0.00262744	0.00168339	0.00221319	0.00216687	0.00184691	0.00245191	0.00263133	0.00309025	0.00184549	0.00444469	0.00973556	0.0114895	0.00201754
0.215443	0.00112599	0.00285169	0.00264564	0.0019657	0.00329998	0.00248555	0.00225371	0.00238052	0.00279456	0.00238213	0.00198763	0.00281866	0.00167208	0.00328612	0.00149315	0.0021036	0.0020517	0.00175166	0.0025134	0.00351742	0.00155002	0.00250495	0.00345225	0.00364992	0.00679687	0.00364695	0.00638718	0.001731	0.00396854	0.002152	0.00206368	0.00233895	0.00338115	0.00170105	0.00187162	0.00233979	0.00242138	0.00167267	0.00243519	0.00204866	0.00161315	0.00247883	0.00257374	0.00306512	0.00165753	0.00420976	0.00972639	0.0111141	0.0020513
0.236449	0.00104279	0.0027571	0.00253966	0.00194661	0.00377893	0.00248391	0.00225583	0.00234613	0.0026137	0.00207989	0.00193433	0.00248081	0.00166021	0.00313133	0.0014067	0.00194651	0.00200999	0.0017496	0.00255525	0.00307256	0.00154883	0.00197999	0.00349152	0.00369197	0.00620504	0.00368576	0.00590139	0.00157294	0.00357589	0.00206317	0.00195108	0.00213583	0.00316407	0.00154732	0.00169036	0.00224535	0.00231908	0.00169218	0.00270797	0.00192122	0.00140245	0.00251362	0.00246376	0.0030581	0.00149301	0.00390853	0.00977944	0.0107127	0.00211859
0.259502	0.00098685	0.00266483	0.00243434	0.00200789	0.00387832	0.00254131	0.00221844	0.00233223	0.00252288	0.00182107	0.00198552	0.00220056	0.00169163	0.00295166	0.00133036	0.00180705	0.00192628	0.0017974	0.00259919	0.00269689	0.00156755	0.00176283	0.00357955	0.00372284	0.00550642	0.0037712	0.00417238	0.00148381	0.00322602	0.00196774	0.00187696	0.00194322	0.00290917	0.00140877	0.00154519	0.00216782	0.00229848	0.00174219	0.00302076	0.00178114	0.00121336	0.00253162	0.00230391	0.00306772	0.00134702	0.00367487	0.00989154	0.0102689	0.00221664
0.284804	0.000954834	0.00256866	0.0023375	0.00215782	0.00330621	0.00265753	0.00211874	0.0023324	0.00250519	0.00162099	0.00217175	0.00196715	0.00176737	0.00276285	0.00126468	0.00168308	0.0018062	0.00187753	0.00263414	0.00238801	0.00159195	0.0016797	0.00368216	0.00376829	0.00479832	0.00390267	0.00317269	0.00146896	0.0029489	0.00185649	0.00183949	0.00176117	0.00264169	0.00128461	0.00142354	0.00210341	0.00234131	0.00182404	0.00332877	0.00163129	0.00104807	0.00254923	0.00210408	0.00309237	0.00121593	0.00352833	0.0100532	0.00977402	0.00233672
0.312572	0.000943534	0.00246255	0.0022591	0.00238858	0.00269412	0.00283385	0.00197894	0.0023384	0.00253995	0.00148188	0.00253611	0.00177053	0.00189435	0.00258487	0.0012109	0.00157274	0.00165885	0.00197175	0.00264328	0.00213598	0.00159821	0.00167976	0.00376491	0.00383103	0.00418168	0.0040755	0.00273104	0.00152555	0.00274116	0.00173384	0.0018332	0.0015895	0.00238305	0.00117583	0.00133057	0.00205212	0.00246648	0.0019396	0.00356512	0.00147921	0.000909701	0.0025172	0.0018793	0.00312981	0.00109876	0.00344867	0.0102422	0.00922853	0.00246212
0.343047	0.00095027	0.00234163	0.00221062	0.00259979	0.00226531	0.00306772	0.00184931	0.0023398	0.00260347	0.00139786	0.00301811	0.00160185	0.00208704	0.00242963	0.00117108	0.00147427	0.00150866	0.00205993	0.00260949	0.00192917	0.00156676	0.00174129	0.00379753	0.00386435	0.0037082	0.00427795	0.00257668	0.00165255	0.00258408	0.0016232	0.00184749	0.00142899	0.00214744	0.00108497	0.00125945	0.00201718	0.00266506	0.00209067	0.00354519	0.00133518	0.000800006	0.00239946	0.00164645	0.00317643	0.000996712	0.0033959	0.0104141	0.00864151	0.00256833
0.376494	0.000972692	0.00220408	0.00220443	0.00253891	0.00197403	0.00332977	0.00176423	0.00232645	0.00266343	0.00136205	0.00318768	0.00145368	0.00236661	0.002299	0.00114791	0.00138592	0.00136434	0.00212098	0.00252358	0.00175688	0.0015072	0.00185783	0.00376225	0.00379148	0.00338485	0.00448936	0.00257438	0.00185199	0.00246123	0.00155555	0.00186544	0.00128166	0.00194151	0.00101497	0.00117913	0.00200247	0.00295084	0.00226986	0.00319584	0.00120919	0.000718994	0.00220412	0.00142104	0.00322612	0.000911432	0.00329391	0.0104951	0.00802803	0.00262778
0.413201	0.00100838	0.00205251	0.00225295	0.00215212	0.00176599	0.00349809	0.00173065	0.00229202	0.00267522	0.00136944	0.00284856	0.00132022	0.00274576	0.00218841	0.00114423	0.00130589	0.00124264	0.00213634	0.00238858	0.00161018	0.00144937	0.0020311	0.00366223	0.00356176	0.00319764	0.00468003	0.00269167	0.00212743	0.00236434	0.00155161	0.00186471	0.00115015	0.00176697	0.000967866	0.0010838	0.00201026	0.00327964	0.00248336	0.00275292	0.00110842	0.000665635	0.00196498	0.00121504	0.00326918	0.000843271	0.00304985	0.010386	0.00740578	0.00261999
0.453488	0.00105431	0.00189378	0.00236767	0.00172812	0.00164083	0.00340849	0.0017426	0.00223666	0.00259429	0.00141746	0.00258395	0.00119729	0.00324827	0.00208982	0.0011622	0.00123235	0.00114698	0.00209542	0.00221821	0.00148223	0.00141344	0.0022618	0.00352038	0.00318473	0.00312574	0.00481641	0.00290192	0.00246738	0.00229029	0.0016076	0.00182341	0.00103661	0.0016239	0.000944073	0.000979943	0.00204086	0.0033951	0.00266638	0.00238199	0.00103651	0.000638678	0.00175878	0.00103614	0.00329142	0.000790651	0.00267311	0.00999082	0.00679197	0.00254138
0.497702	0.00110607	0.00173703	0.00255709	0.00141886	0.00160346	0.00311281	0.00179113	0.00216699	0.00241602	0.00150589	0.00259008	0.00108219	0.00357785	0.00199315	0.00120213	0.00116351	0.00107355	0.0020017	0.00203451	0.00136837	0.00140161	0.00250947	0.00336483	0.0027964	0.00314537	0.00487206	0.0031734	0.00289804	0.00223769	0.00173941	0.0017306	0.000942068	0.00151193	0.000942322	0.000888694	0.00209398	0.00299267	0.00269194	0.00209896	0.000994719	0.000637092	0.00159392	0.000888137	0.00327443	0.000750571	0.00230888	0.00927054	0.00620114	0.00240577
0.546228	0.00115692	0.00159065	0.00282141	0.00121568	0.00164915	0.00280797	0.00186587	0.0020936	0.00219381	0.00163707	0.00275215	0.00097348	0.00307929	0.00188746	0.00126129	0.00109778	0.0010214	0.00187197	0.0018626	0.00126586	0.00140327	0.00273408	0.00321318	0.00249212	0.00322826	0.0048374	0.003457	0.00338476	0.00220512	0.00190885	0.00159341	0.000866447	0.00142958	0.000960036	0.000834696	0.00217011	0.00244779	0.00248524	0.00190858	0.000983231	0.000660044	0.00147785	0.000771923	0.00319771	0.000719528	0.00201685	0.00828427	0.00564411	0.00223539
0.599484	0.00119666	0.00146026	0.00313884	0.00108177	0.00177599	0.00255255	0.00195336	0.00202779	0.00199072	0.00181655	0.00293611	0.000870645	0.0022857	0.00176363	0.00133269	0.00103382	0.000974794	0.00172846	0.0017221	0.00117351	0.00139998	0.00262585	0.00306731	0.00229643	0.00333889	0.00471744	0.00374209	0.00387203	0.00219066	0.00206791	0.00143268	0.000809042	0.00138484	0.00099389	0.000818148	0.002271	0.00210367	0.00216071	0.00179533	0.00100196	0.000706476	0.00139312	0.000686449	0.00304404	0.00069445	0.00182062	0.00716707	0.00512783	0.0020512
0.657933	0.00121196	0.0013483	0.00344109	0.000993086	0.00197254	0.00235557	0.00203443	0.00197847	0.00183375	0.0020542	0.00303434	0.000773766	0.00177593	0.00161926	0.00140452	0.000970638	0.000934843	0.00159076	0.00162122	0.00109112	0.00137128	0.00216294	0.00291594	0.00217947	0.00343387	0.00451762	0.00399543	0.00426972	0.00219232	0.00217001	0.0012715	0.000768985	0.00134776	0.00104043	0.000844822	0.00239846	0.00196546	0.00183928	0.00173681	0.00105067	0.000774329	0.00134675	0.000629519	0.00280759	0.000673413	0.00170308	0.00606049	0.00465579	0.00186834
0.722081	0.00119124	0.00125494	0.00361782	0.000935529	0.00220508	0.00220073	0.00208303	0.00195001	0.00171531	0.00236451	0.00302538	0.00068323	0.00145999	0.00146289	0.00146093	0.000907674	0.00089898	0.00147272	0.00155762	0.00101903	0.00130548	0.00173215	0.00273904	0.00212282	0.003468	0.00423233	0.00420648	0.00451375	0.00220898	0.00220545	0.00112724	0.000745631	0.00132375	0.00109662	0.000905892	0.00254975	0.00196729	0.0015572	0.00170705	0.0011284	0.000859653	0.00132106	0.000598289	0.00250107	0.000655941	0.00164281	0.00506054	0.0042287	0.00169579
0.792483	0.00113392	0.0011797	0.00361127	0.000900735	0.0024168	0.00207405	0.00207139	0.00194199	0.00161571	0.00276285	0.0029738	0.0005995	0.00125627	0.00131221	0.00148508	0.000844748	0.000865242	0.00138321	0.0015227	0.000958073	0.0012087	0.00146336	0.00251546	0.00210524	0.00341029	0.00386725	0.00434033	0.00462739	0.00224106	0.00219499	0.00101017	0.000738832	0.00130932	0.00115997	0.000994401	0.00270638	0.00207583	0.00132544	0.00167806	0.00123246	0.00095606	0.00130978	0.000589481	0.00215472	0.000642637	0.00162144	0.00420978	0.00384518	0.00153791
0.869749	0.00105517	0.0011234	0.0034775	0.000883544	0.00255532	0.00196533	0.00198771	0.00196041	0.00152273	0.00325467	0.00296944	0.000522952	0.00110835	0.00118636	0.00146463	0.000782047	0.000831911	0.00132759	0.00150617	0.000909862	0.0011008	0.00132171	0.00223709	0.00211034	0.00326269	0.00340945	0.00432362	0.00460496	0.00228954	0.00216675	0.00092542	0.00074899	0.00130179	0.00122808	0.00109207	0.00281221	0.00228294	0.00113837	0.00162571	0.0013572	0.00105496	0.00131028	0.000599428	0.00180584	0.000634259	0.00162535	0.00351334	0.00350244	0.00139646
0.954548	0.000978165	0.00108975	0.00329968	0.000880377	0.0025927	0.00186686	0.00185444	0.00197704	0.00143533	0.00382451	0.00289055	0.000453791	0.000987634	0.00109869	0.00139723	0.000720031	0.000797734	0.00130739	0.00149886	0.000877247	0.00100097	0.0012613	0.00192303	0.00212539	0.00306196	0.00292744	0.00414914	0.00443781	0.00235267	0.00209756	0.000875405	0.000776645	0.0012944	0.00129765	0.00116059	0.00276824	0.00253428	0.000986599	0.00153936	0.00149324	0.00114624	0.00132335	0.000624052	0.00148605	0.000630572	0.0016434	0.00295699	0.00319687	0.00127236
1.04762	0.000921724	0.00108545	0.00311045	0.000888218	0.00250607	0.00177302	0.00171803	0.00197826	0.00135788	0.00437901	0.00255863	0.000392023	0.000883053	0.00105493	0.00129215	0.000659331	0.000762651	0.00131829	0.00149495	0.00086463	0.000918745	0.00124565	0.00161384	0.00213629	0.00285588	0.00249155	0.00385209	0.00407668	0.00242104	0.00198899	0.000861391	0.000821246	0.00127525	0.00136359	0.00116415	0.0025138	0.00274919	0.000861421	0.00142546	0.00162748	0.00121854	0.00135234	0.000658901	0.00121471	0.000629644	0.00166471	0.00251939	0.00292447	0.00116691
1.14976	0.000895825	0.00111775	0.00290651	0.000904095	0.00228629	0.00168014	0.00161677	0.00192949	0.00129452	0.00476857	0.00207243	0.000337465	0.000792962	0.00105482	0.00116613	0.000600646	0.000728608	0.0013479	0.0014937	0.000877931	0.00085547	0.0012446	0.0013466	0.00213967	0.00267686	0.00214604	0.00358633	0.0035281	0.00247103	0.00184428	0.000884117	0.000879289	0.00123297	0.00141883	0.0011131	0.00213572	0.00286822	0.000756659	0.00130886	0.00174432	0.00125971	0.0014022	0.000699333	0.00099946	0.000628132	0.00167871	0.00217891	0.00268121	0.00108233
1.26186	0.000904034	0.00118976	0.00268278	0.000925038	0.00198515	0.00158624	0.00156483	0.00180301	0.00124683	0.00467639	0.00168521	0.000289791	0.00071955	0.00109417	0.00103679	0.000544644	0.000699584	0.00137658	0.00149868	0.000924163	0.000808326	0.00123284	0.00113907	0.00213646	0.00253449	0.00190156	0.00337873	0.00290075	0.00245925	0.00168444	0.000943412	0.000942907	0.00116494	0.00145548	0.00104421	0.00177847	0.00284176	0.000668678	0.0011833	0.00182815	0.0012597	0.00147808	0.000740873	0.000840148	0.000622728	0.00167757	0.00191688	0.00246328	0.00102169
1.38489	0.000946977	0.00129501	0.0024454	0.000948433	0.0016936	0.00149097	0.00155755	0.00160836	0.00121484	0.00399194	0.00143252	0.000248588	0.000664869	0.00116579	0.000917879	0.000491891	0.000680413	0.00138574	0.00151279	0.00101051	0.000772978	0.00119276	0.000992791	0.0020985	0.00242362	0.00174831	0.00328658	0.00232818	0.00233225	0.00153858	0.00103677	0.00100044	0.00108193	0.00146717	0.000978439	0.00150543	0.0026966	0.000595577	0.00106249	0.00186721	0.00121744	0.00158219	0.000779664	0.000732788	0.000611883	0.00165906	0.00171881	0.00226719	0.000988805
1.51991	0.00102311	0.00141263	0.00220818	0.000972548	0.0014446	0.00139511	0.00158078	0.001393	0.00119958	0.00313899	0.0012944	0.000213421	0.000628963	0.00125962	0.000817776	0.000442808	0.000675108	0.00136976	0.0015301	0.00114268	0.000744944	0.00111905	0.000901984	0.00202887	0.00233418	0.00167208	0.00327801	0.00187977	0.00207064	0.00142823	0.00115704	0.00103913	0.00100142	0.00145151	0.000906175	0.0013103	0.00244267	0.000536017	0.000948716	0.00185755	0.00114561	0.00170734	0.000812894	0.000672161	0.000596414	0.0016257	0.00157475	0.00208991	0.000988308
1.6681	0.00112643	0.00150657	0.00198452	0.000996867	0.00125629	0.00130048	0.00161698	0.00120549	0.00120441	0.00239387	0.00124239	0.000183915	0.000609733	0.00136257	0.00074036	0.000397649	0.000685648	0.00133764	0.0015331	0.00132238	0.000720408	0.0010198	0.000859532	0.00190297	0.00225578	0.00166086	0.00328556	0.00155824	0.0017296	0.00136148	0.00129045	0.00104846	0.000937764	0.0014109	0.000828089	0.00117041	0.00215174	0.000488386	0.000842664	0.00180478	0.00106497	0.00182848	0.00083905	0.000653012	0.000578631	0.001581	0.00147889	0.00192885	0.00102597
1.83074	0.0012411	0.00153529	0.00178259	0.0010219	0.00112101	0.00120979	0.00164923	0.00106859	0.00123492	0.00186255	0.00125719	0.000159835	0.000603551	0.00145917	0.000686513	0.000356513	0.000711464	0.00130265	0.00150264	0.00154416	0.000696957	0.000911439	0.000859312	0.00173032	0.00217865	0.00170471	0.00322868	0.00133641	0.00139932	0.00133629	0.00141745	0.00102326	0.000898096	0.00135106	0.000750709	0.00106612	0.00187109	0.000450597	0.000744373	0.0017214	0.000992717	0.0019043	0.000857992	0.000670128	0.000561029	0.00152702	0.00142868	0.0017819	0.00110885
2.00923	0.00133477	0.00147586	0.00160499	0.00104858	0.00102654	0.00112587	0.00166356	0.000982536	0.00129693	0.00152357	0.0013248	0.000141191	0.000605947	0.00153351	0.000655435	0.000319357	0.000749206	0.00127431	0.00143192	0.00179296	0.000674269	0.000809596	0.000896357	0.00152919	0.00209469	0.00179372	0.00305867	0.00118739	0.00113285	0.00134492	0.00151721	0.000966121	0.000883507	0.00127871	0.000685016	0.000983696	0.00162396	0.000420358	0.000655324	0.00162136	0.000936695	0.00190377	0.000870906	0.000717752	0.000545584	0.00146421	0.00142345	0.00164744	0.00124458
2.20513	0.00136217	0.00134501	0.00145096	0.0010777	0.000962426	0.00105076	0.00165058	0.000936319	0.00139273	0.00133044	0.00142966	0.000128358	0.000612226	0.00157234	0.000645503	0.000286026	0.000792708	0.001258	0.00132776	0.00204384	0.000654413	0.000723509	0.000965857	0.00132558	0.00200062	0.0019167	0.0027937	0.0010919	0.000938553	0.00137645	0.00157298	0.000887458	0.000891943	0.00120003	0.000639286	0.000915513	0.00141325	0.000395609	0.000577843	0.00151549	0.000897204	0.00183292	0.000880211	0.000788742	0.000533787	0.00139371	0.00146247	0.00152434	0.00143846
2.42013	0.00129308	0.00118833	0.00131883	0.00110958	0.000920791	0.000985325	0.00160674	0.000913796	0.00151584	0.00124864	0.00154582	0.000122214	0.000618042	0.0015683	0.000654666	0.000256283	0.000833534	0.00125792	0.00120295	0.00226538	0.000641362	0.000656108	0.00106169	0.00114215	0.0019021	0.00206197	0.00249501	0.00103696	0.000806323	0.0014181	0.00157511	0.000801418	0.000920718	0.00112035	0.000616078	0.000859944	0.00123267	0.000374874	0.000513464	0.00141001	0.000871238	0.00172346	0.000889425	0.000873969	0.000526964	0.00132004	0.00154285	0.00141207	0.00168705
2.65609	0.0011468	0.00104858	0.00120738	0.00114405	0.000895869	0.000929431	0.00153544	0.000897308	0.00164612	0.00125985	0.00163372	0.000124258	0.000619973	0.0015217	0.000680497	0.000229843	0.000862922	0.0012792	0.00107004	0.00242624	0.000639698	0.000606516	0.00117511	0.000990616	0.00181581	0.00222098	0.00221701	0.00101343	0.000723405	0.00145676	0.0015228	0.000720123	0.000968198	0.00104437	0.000613701	0.00082083	0.00107552	0.000357385	0.000462058	0.00130746	0.000855863	0.00159048	0.000902875	0.00096234	0.000526533	0.00125075	0.00165774	0.00131082	0.0019681
2.91505	0.000978305	0.000949	0.00111612	0.0011803	0.000883494	0.000882683	0.00144677	0.000872528	0.00174987	0.00135431	0.00165812	0.000136673	0.000615975	0.00143973	0.000720053	0.000206392	0.000875282	0.00132741	0.000940223	0.00250366	0.000653011	0.000572328	0.00129456	0.000872921	0.00176644	0.00239278	0.00198617	0.00101386	0.000679284	0.00148116	0.00142539	0.000650401	0.00103449	0.000976323	0.000627926	0.000806468	0.00093982	0.000342952	0.00042197	0.00120861	0.000849861	0.00143464	0.000925155	0.00104172	0.000533984	0.00119359	0.0017954	0.00122164	0.00223304
3.19927	0.000831846	0.000896309	0.00104479	0.00121666	0.000880751	0.000845099	0.00135398	0.000834199	0.00179112	0.00152135	0.00161776	0.00016224	0.000605543	0.00133366	0.000769683	0.000185613	0.00087142	0.0014049	0.000823333	0.00249074	0.000682384	0.000550943	0.00140736	0.000786698	0.00177801	0.00258474	0.00180712	0.00103087	0.000666448	0.00148396	0.00130086	0.000593985	0.00112098	0.000919891	0.000652506	0.000828546	0.000827348	0.000331666	0.000390615	0.0011141	0.000853608	0.00126744	0.00096028	0.00110068	0.000550587	0.00115344	0.00193973	0.0011466	0.00241493
3.51119	0.000723569	0.000888394	0.000992999	0.00125036	0.000885855	0.000817514	0.00126809	0.000787976	0.00175142	0.00173671	0.00154392	0.000204074	0.00058949	0.00121557	0.000825048	0.000167199	0.000858562	0.00150417	0.000726164	0.00239842	0.000725049	0.000540019	0.00150377	0.000728773	0.00186172	0.00279163	0.00167393	0.00105638	0.000680178	0.00146308	0.00117024	0.00054936	0.00122846	0.000878118	0.000679267	0.000901539	0.000740364	0.00032361	0.000365127	0.00102517	0.000867584	0.00110067	0.00101063	0.00113059	0.000577019	0.00113074	0.00207229	0.00108879	0.00245719
3.85353	0.000652424	0.000919078	0.000960164	0.0012775	0.000898142	0.000801481	0.00119387	0.000745638	0.00164258	0.00194949	0.00147144	0.000265137	0.00056941	0.00109593	0.000881554	0.000150864	0.000846996	0.00160194	0.000651535	0.00225019	0.000773385	0.000537368	0.00158194	0.000696541	0.00200441	0.00302934	0.0015771	0.00108153	0.000718263	0.00142153	0.00105078	0.000513628	0.00135406	0.000853547	0.000699017	0.00104232	0.000679509	0.000318694	0.000342898	0.000943569	0.000890302	0.000945512	0.00107587	0.00112728	0.000613081	0.00112137	0.00217559	0.00105216	0.00234551
4.22924	0.000612961	0.000979645	0.000945966	0.0012936	0.000917829	0.000798678	0.00112914	0.000718168	0.00149782	0.00208509	0.00142281	0.000347616	0.000547116	0.000982494	0.00093536	0.000136347	0.000846498	0.00166165	0.000598948	0.00207269	0.000815195	0.000540533	0.00165134	0.000688154	0.00216282	0.00323926	0.00150743	0.00109777	0.000780746	0.0013657	0.000952285	0.000483772	0.00148708	0.000848668	0.000703913	0.00126797	0.000643581	0.000316637	0.00032194	0.000871065	0.000916729	0.000809729	0.00115218	0.0010916	0.000657579	0.00111737	0.00223672	0.00104116	0.00211718
4.64159	0.000600439	0.00105866	0.000951131	0.0012946	0.000944981	0.000809958	0.00106727	0.000712047	0.00135018	0.00208173	0.00140896	0.000452278	0.000524278	0.000880146	0.000984789	0.000123415	0.000865114	0.00165073	0.000565772	0.0018878	0.000836645	0.000546399	0.0017319	0.000702147	0.00227169	0.00335732	0.00145722	0.00109844	0.000869324	0.00130288	0.000877407	0.000457335	0.0016061	0.000866523	0.000690263	0.00158589	0.000630086	0.000317034	0.000301067	0.000808908	0.000938228	0.000696752	0.00123196	0.00102863	0.000708308	0.00110853	0.00224995	0.00106005	0.001838
5.09414	0.000612045	0.00114169	0.000978046	0.00127789	0.000977441	0.000834219	0.00100127	0.000728917	0.00121892	0.0019374	0.00143265	0.000577974	0.000502345	0.000791373	0.00103159	0.000111866	0.000910189	0.00156301	0.000548171	0.0017095	0.000827746	0.000551126	0.00184768	0.000736707	0.00227034	0.00333913	0.00142012	0.00108025	0.000985787	0.001239	0.00082399	0.000432672	0.00168141	0.000911098	0.000659772	0.00196719	0.000635562	0.000319449	0.000279861	0.000757583	0.000944789	0.000606037	0.00130459	0.000946031	0.000762027	0.00108521	0.00221757	0.00111212	0.00156686
5.59081	0.000647048	0.00121223	0.00103056	0.00124306	0.0010084	0.00086732	0.000927673	0.00076611	0.00110915	0.00170857	0.00148883	0.000721444	0.000482657	0.00071682	0.00108119	0.000101522	0.000990058	0.00142284	0.000541674	0.0015446	0.000787261	0.000550675	0.00201508	0.000788613	0.00213572	0.00319658	0.00139035	0.0010437	0.00112874	0.00117743	0.000787675	0.000408903	0.00168599	0.000986906	0.000618133	0.00231387	0.00065537	0.000323477	0.000258488	0.000716793	0.000929092	0.000534483	0.00135825	0.000852177	0.000814455	0.00104176	0.00214857	0.00119894	0.00133722
6.13591	0.000706849	0.00125493	0.0011124	0.00119181	0.00102581	0.000901478	0.000848208	0.000816664	0.00101734	0.0014612	0.00156224	0.000877517	0.00046657	0.000655841	0.00114139	9.22337e-05	0.00111443	0.00126582	0.00054165	0.00139515	0.000723033	0.000541822	0.00222579	0.000851921	0.0018948	0.00292835	0.00136206	0.000992248	0.00128832	0.00111901	0.000763774	0.000385725	0.00161068	0.00109721	0.00057209	0.0024843	0.000683143	0.00032875	0.00023743	0.000685595	0.000890029	0.000477847	0.00138272	0.000754673	0.000860412	0.000978849	0.00205594	0.00131966	0.00115933
6.73415	0.00079507	0.0012601	0.00122405	0.00112741	0.00101616	0.000925926	0.000768238	0.000869168	0.000936755	0.00123543	0.00162578	0.00103968	0.000455401	0.000606956	0.00121963	8.38707e-05	0.00129127	0.0011183	0.000543893	0.00126079	0.000647452	0.000523193	0.00242747	0.000916914	0.00160439	0.00259739	0.00132926	0.00093074	0.00144064	0.0010627	0.000748281	0.000363182	0.00147092	0.00124061	0.000527058	0.00240615	0.000710489	0.000334897	0.000217246	0.000662555	0.00083297	0.000431745	0.00137211	0.000659526	0.000894329	0.000902848	0.00195353	0.00147071	0.00102996
7.39072	0.000917406	0.00122701	0.00135849	0.00105382	0.000972474	0.000929552	0.000693674	0.000908965	0.000861036	0.00104506	0.00164801	0.0012009	0.000450144	0.000568216	0.00131962	7.63231e-05	0.00151583	0.000991734	0.000545275	0.00114031	0.000571987	0.000495631	0.00252456	0.000970469	0.00131933	0.00225735	0.00128663	0.000863977	0.00154832	0.00100666	0.00073819	0.000341461	0.00129733	0.00140662	0.000486273	0.00214535	0.000727826	0.000341463	0.000198402	0.000645884	0.000766679	0.000392323	0.00132639	0.000570893	0.000911205	0.000822726	0.00185354	0.00164586	0.000940297
8.11131	0.00108002	0.00116332	0.00149748	0.000975018	0.000899715	0.000904996	0.000628534	0.000922116	0.000786175	0.000889864	0.00160102	0.00135457	0.00045096	0.000537483	0.00143852	6.94967e-05	0.00174824	0.000887084	0.000544205	0.00103244	0.000504286	0.000461628	0.00243535	0.000999005	0.00107395	0.0019476	0.00123088	0.000795819	0.00157519	0.000949111	0.000731368	0.000320753	0.00111943	0.00157229	0.000451099	0.00182762	0.000726819	0.000347829	0.0001812	0.000633552	0.000699516	0.000356675	0.00125093	0.00049122	0.000907802	0.000746454	0.00176488	0.00183661	0.000880313
8.90215	0.00128395	0.00108108	0.00161149	0.000894531	0.000811729	0.000851914	0.000574149	0.000901098	0.000710982	0.000764669	0.00147867	0.00149523	0.000456655	0.000512648	0.00156561	6.33112e-05	0.00189778	0.000800584	0.000540593	0.000936075	0.000448037	0.000424253	0.00217118	0.000993492	0.00088105	0.00168406	0.00116173	0.000728935	0.00150993	0.000888982	0.000726257	0.000301177	0.000956017	0.00170435	0.000421701	0.00153739	0.000703523	0.00035316	0.000165761	0.000623402	0.000637228	0.000323039	0.00115442	0.000421582	0.000883576	0.000678896	0.0016927	0.00203298	0.000840766
9.7701	0.0015163	0.000991892	0.00166764	0.000815193	0.00072276	0.000776896	0.000529579	0.000848135	0.000636464	0.000663613	0.00130561	0.00161909	0.000464381	0.000491787	0.0016838	5.76976e-05	0.00186909	0.000727447	0.000535297	0.000850295	0.000404012	0.000386209	0.00182551	0.000953309	0.00073894	0.00146616	0.00108178	0.000664947	0.00137427	0.000826177	0.000721565	0.000282758	0.000815026	0.0017701	0.000397589	0.00130233	0.000659911	0.000356432	0.000152057	0.000613297	0.000582608	0.000290717	0.00104638	0.000362062	0.000840843	0.000621454	0.00163853	0.00222443	0.000813967
10.7227	0.00173932	0.000903958	0.00164451	0.000739102	0.000641695	0.000690143	0.000492516	0.000773124	0.000564688	0.000581564	0.00111398	0.00172408	0.000469876	0.000473275	0.00177451	5.25963e-05	0.00166358	0.000663611	0.000529324	0.000774224	0.000371135	0.000349376	0.00148925	0.000885847	0.000638824	0.00128665	0.000995389	0.00060471	0.00120572	0.000761493	0.000716073	0.000265443	0.000697372	0.0017532	0.000377937	0.00112024	0.000602441	0.000356535	0.000139957	0.000601318	0.000536169	0.000259781	0.000935142	0.000312091	0.000784074	0.000572839	0.00160102	0.00240085	0.000793946
11.7681	0.00188538	0.000821474	0.00154406	0.000667657	0.00057157	0.000601472	0.000460193	0.000688178	0.000497746	0.000514389	0.000930515	0.00180964	0.000468445	0.000455837	0.00182413	4.79558e-05	0.00137827	0.000606274	0.000523163	0.000706955	0.000347202	0.000314793	0.00120712	0.000802357	0.000569875	0.00113711	0.000907078	0.000548602	0.00103577	0.000696304	0.000708576	0.000249122	0.00060063	0.00166187	0.000361736	0.000979809	0.000538862	0.000352477	0.000129264	0.000585969	0.000497044	0.000230685	0.00082695	0.00027073	0.000718671	0.000530274	0.00157679	0.00255341	0.000776368
12.9155	0.00188595	0.000745476	0.00138938	0.000601649	0.000511685	0.000517938	0.000430109	0.000603144	0.000437145	0.000458847	0.000771145	0.00187628	0.000456485	0.000438561	0.00182865	4.37307e-05	0.00110353	0.000553803	0.000516478	0.000647518	0.000329353	0.000282868	0.000987248	0.000713431	0.00052203	0.00101015	0.000820534	0.000496733	0.000881714	0.000632176	0.000697943	0.000233662	0.000521287	0.0015222	0.000347868	0.000869196	0.000475576	0.000343605	0.000119759	0.000566348	0.00046373	0.000203939	0.000725791	0.000236867	0.000649786	0.000490688	0.00156131	0.00267523	0.000758311
14.1747	0.00172902	0.000675203	0.00121118	0.000541389	0.000459848	0.000443408	0.000400493	0.000524059	0.000383627	0.000412399	0.000639952	0.00192504	0.000432833	0.000420875	0.00179314	3.98815e-05	0.000878217	0.000505395	0.000508204	0.000594896	0.0003145	0.000253635	0.000821202	0.000626621	0.00048723	0.000900055	0.000738237	0.000449073	0.000749463	0.000570546	0.000683247	0.000218932	0.000455851	0.00136359	0.000335176	0.000778658	0.00041663	0.000329794	0.000111227	0.000542221	0.000434599	0.000179902	0.000633782	0.000209355	0.00058157	0.000451686	0.00154976	0.0027618	0.000738013
15.5568	0.00147362	0.000609321	0.00103497	0.000486832	0.00041382	0.000379243	0.000370467	0.000453659	0.000337254	0.000373048	0.000534074	0.00195711	0.000399116	0.000402497	0.00172718	3.63729e-05	0.00070714	0.000460708	0.00049693	0.000548071	0.00029981	0.000226955	0.000696321	0.000546232	0.000459689	0.000802723	0.00066159	0.000405523	0.000638735	0.000512531	0.00066389	0.000204824	0.000401298	0.00120809	0.000322556	0.000701017	0.000363943	0.000311501	0.000103471	0.00051397	0.000408201	0.000158715	0.000551676	0.000187097	0.000516899	0.000412072	0.0015376	0.00281099	0.000714605
17.0735	0.00119735	0.000546743	0.000876127	0.000437704	0.000371991	0.000325235	0.000339949	0.000392541	0.000297609	0.000339222	0.00044885	0.00197354	0.000358894	0.000383367	0.00163985	3.31736e-05	0.000579574	0.000419589	0.000481396	0.000506076	0.000283209	0.000202643	0.000600913	0.000474143	0.000435651	0.000715424	0.000591236	0.000365936	0.000546783	0.000458856	0.000639695	0.000191259	0.000355196	0.0010677	0.000309079	0.000631485	0.000317976	0.00028967	9.633e-05	0.000482443	0.000383418	0.000140314	0.000479349	0.0001691	0.00045746	0.000371882	0.00152107	0.00282298	0.00068788
18.7382	0.000951079	0.000486998	0.000740993	0.000393596	0.000333506	0.00028036	0.000309393	0.000340161	0.000263994	0.000309688	0.000379895	0.00197516	0.000316247	0.000363587	0.00153721	3.02556e-05	0.000482983	0.000381911	0.000460932	0.000468044	0.00026373	0.00018053	0.000525853	0.000410744	0.000412937	0.000636455	0.000527333	0.000330132	0.000470343	0.000409883	0.000610923	0.00017819	0.000315675	0.00094642	0.000294116	0.000567264	0.000278381	0.000265526	8.9676e-05	0.000448739	0.000359511	0.00012449	0.000416172	0.000154492	0.000404	0.000332001	0.00149745	0.00279984	0.000658083
20.5651	0.000754449	0.000430227	0.000630058	0.000354047	0.00029807	0.000243287	0.000279486	0.000295504	0.000235592	0.000283495	0.000323635	0.00196261	0.000274615	0.000343355	0.00142263	2.75938e-05	0.000408061	0.000347501	0.000435658	0.000433238	0.000241533	0.000160478	0.000464676	0.000355635	0.000390461	0.00056482	0.000469759	0.000297896	0.000406449	0.000365677	0.000578215	0.0001656	0.000281345	0.000843549	0.000277412	0.000507053	0.000244451	0.000240341	8.34162e-05	0.000414013	0.000336081	0.000110948	0.000361278	0.000142533	0.000356617	0.000293646	0.00146512	0.00274512	0.000625741
22.5702	0.000604179	0.000376956	0.00054079	0.000318595	0.000265672	0.000212657	0.000250909	0.000257443	0.000211573	0.000259921	0.000277304	0.00193645	0.000236285	0.000322917	0.00129853	2.51653e-05	0.00034856	0.000316135	0.000406427	0.000401066	0.000217594	0.00014237	0.000413105	0.000308059	0.000367825	0.000499943	0.000418215	0.000268983	0.000352672	0.000326091	0.000542485	0.000153495	0.000251196	0.000756275	0.000259092	0.00045052	0.000215378	0.000215245	7.74878e-05	0.000379314	0.000313007	9.93673e-05	0.000313721	0.000132608	0.00031501	0.000257927	0.00142351	0.00266333	0.000591529
24.7708	0.000490056	0.00032782	0.000469513	0.000286806	0.00023636	0.000187236	0.000224191	0.000224925	0.000191162	0.000238436	0.000238799	0.00189736	0.000202409	0.000302527	0.00116794	2.29496e-05	0.000300349	0.000287553	0.000374565	0.000371076	0.000193228	0.000126104	0.000368462	0.000267145	0.000345023	0.000441457	0.0003723	0.00024313	0.000307106	0.00029084	0.000504791	0.000141895	0.000224498	0.000681311	0.000239576	0.000397836	0.000190395	0.00019112	7.18526e-05	0.000345501	0.000290349	8.94301e-05	0.000272578	0.000124219	0.000278663	0.000225603	0.00137297	0.00255949	0.000556167
27.1859	0.000402725	0.00028334	0.000412461	0.00025829	0.000210113	0.000165964	0.00019966	0.000197036	0.000173679	0.000218662	0.000206525	0.0018462	0.000173284	0.000282426	0.001035	2.0928e-05	0.000260654	0.000261486	0.000341536	0.000342946	0.000169679	0.000111572	0.000329121	0.000232026	0.000322239	0.000389053	0.000331548	0.000220059	0.000268275	0.000259563	0.000466204	0.000130827	0.000200727	0.000615718	0.000219454	0.000349328	0.00016883	0.00016857	6.64903e-05	0.000313208	0.000268274	8.08502e-05	0.000236997	0.000116969	0.000246978	0.000197026	0.00131448	0.00243871	0.00052035
29.8365	0.000335084	0.000243802	0.000366285	0.000232702	0.000186804	0.000147977	0.000177451	0.000173014	0.000158546	0.00020034	0.000179269	0.0017841	0.000148673	0.000262823	0.000904442	1.90836e-05	0.000227552	0.000237677	0.000308682	0.000316459	0.000147868	9.86603e-05	0.000294098	0.000201901	0.000299727	0.000342406	0.000295459	0.000199491	0.000235031	0.000231873	0.000427713	0.000120319	0.000179495	0.00055722	0.000199349	0.000305261	0.000150119	0.000147944	6.1393e-05	0.000282858	0.000246981	7.33814e-05	0.000206217	0.000110552	0.000219351	0.000172198	0.00124951	0.00230592	0.000484699
32.7455	0.000281991	0.000209231	0.000328239	0.00020974	0.000166216	0.000132587	0.000157549	0.000152238	0.000145294	0.000183296	0.000156102	0.00171249	0.000128068	0.000243887	0.000780691	1.74009e-05	0.000199662	0.000215897	0.000277058	0.000291477	0.000128332	8.72463e-05	0.000262772	0.000176054	0.000277741	0.00030114	0.000263533	0.000181152	0.000206462	0.000207378	0.000390157	0.000110393	0.000160503	0.000504217	0.000179815	0.000265746	0.0001338	0.000129391	5.65599e-05	0.000254688	0.000226661	6.68199e-05	0.000179573	0.000104735	0.000195221	0.000150881	0.00117972	0.00216558	0.000449739
35.9381	0.000239756	0.000179423	0.0002962	0.000189135	0.000148082	0.000119261	0.000139838	0.000134203	0.000133548	0.000167419	0.000136301	0.00163301	0.000110869	0.00022575	0.000667148	1.58658e-05	0.000175963	0.000195946	0.000247386	0.000267922	0.000111267	7.71988e-05	0.000234711	0.000153857	0.000256504	0.000264833	0.000235287	0.000164784	0.000181834	0.000185709	0.000354194	0.000101066	0.000143513	0.000455675	0.000161282	0.00023072	0.000119499	0.000112911	5.19935e-05	0.000228798	0.000207465	6.10022e-05	0.000156491	9.93463e-05	0.000174087	0.000132695	0.00110684	0.00202162	0.000415888
39.4421	0.000205715	0.000154013	0.000268602	0.000170652	0.000132116	0.000107593	0.000124144	0.0001185	0.000123015	0.000152636	0.000119299	0.00154747	9.64916e-05	0.000208505	0.000565849	1.44654e-05	0.000155676	0.000177656	0.000220084	0.000245752	9.66233e-05	6.83835e-05	0.000209583	0.00013477	0.000236189	0.000233028	0.000210274	0.000150149	0.000160543	0.000166525	0.000320291	9.23467e-05	0.000128323	0.000410969	0.000144034	0.000199973	0.000106913	9.8412e-05	4.76965e-05	0.00020518	0.000189497	5.57994e-05	0.000136477	9.42627e-05	0.000155518	0.00011721	0.00103251	0.00187733	0.000383461
43.2876	0.000177934	0.000132534	0.00024433	0.000154076	0.00011804	9.72785e-05	0.000110268	0.000104793	0.000113476	0.000138897	0.000104644	0.00145771	8.44126e-05	0.000192209	0.000477529	1.3188e-05	0.000138195	0.000160888	0.000195322	0.000224945	8.41988e-05	6.06671e-05	0.000187104	0.000118329	0.000216925	0.000205256	0.00018809	0.000137029	0.000142088	0.00014952	0.000288749	8.42335e-05	0.000114754	0.000369733	0.000128229	0.000173194	9.57966e-05	8.57417e-05	4.36706e-05	0.000183761	0.000172811	5.11117e-05	0.000119109	8.94008e-05	0.000139147	0.000103998	0.000958191	0.00173537	0.00035268
47.5081	0.00015499	0.000114481	0.000222618	0.000139215	0.000105605	8.80863e-05	9.80057e-05	9.28052e-05	0.000104762	0.000126164	9.19719e-05	0.00136555	7.41952e-05	0.000176895	0.000401902	1.20228e-05	0.000123045	0.000145525	0.000173099	0.000205484	7.37191e-05	5.39212e-05	0.00016702	0.000104138	0.000198793	0.000181059	0.000168379	0.000125234	0.000126048	0.000134422	0.000259718	7.67173e-05	0.000102648	0.000331751	0.000113918	0.000150014	8.59478e-05	7.47229e-05	3.99148e-05	0.000164422	0.000157415	4.68617e-05	0.000104027	8.47062e-05	0.000124667	9.2671e-05	0.000885137	0.00159779	0.000323683
52.1401	0.000135828	9.93532e-05	0.000202954	0.000125892	9.45889e-05	7.9844e-05	8.71676e-05	8.23041e-05	9.67497e-05	0.000114402	8.09838e-05	0.00127265	6.54856e-05	0.000162569	0.00033801	1.09601e-05	0.000109843	0.000131467	0.000153299	0.000187352	6.48901e-05	4.80256e-05	0.000149097	9.18633e-05	0.000181834	0.000159996	0.000150832	0.000114596	0.000112067	0.000120994	0.000233232	6.97816e-05	9.18558e-05	0.00029688	0.000101079	0.000130039	7.71995e-05	6.51708e-05	3.64254e-05	0.00014702	0.000143284	4.29898e-05	9.09211e-05	8.0147e-05	0.000111822	8.28947e-05	0.000814344	0.00146612	0.000296542
57.2237	0.000119661	8.66815e-05	0.000184997	0.000113947	8.48044e-05	7.24197e-05	7.75796e-05	7.30929e-05	8.93477e-05	0.000103574	7.14337e-05	0.00118051	5.80043e-05	0.00014922	0.000284533	9.991e-06	9.82852e-05	0.000118624	0.000135745	0.000170525	5.74317e-05	4.28699e-05	0.000133115	8.12206e-05	0.00016606	0.000141665	0.000135186	0.00010497	9.98471e-05	0.00010903	0.000209238	6.34043e-05	8.22429e-05	0.000264998	8.96377e-05	0.000112877	6.94118e-05	5.69054e-05	3.3196e-05	0.000131402	0.000130367	3.94493e-05	7.95259e-05	7.5707e-05	0.000100398	7.43922e-05	0.000746573	0.00134141	0.000271274
62.8029	0.000105891	7.60461e-05	0.000168526	0.000103232	7.6093e-05	6.57109e-05	6.90883e-05	6.50032e-05	8.24871e-05	9.36421e-05	6.31161e-05	0.0010904	5.15323e-05	0.000136823	0.00024003	9.10721e-06	8.81224e-05	0.000106914	0.000120228	0.00015497	5.10958e-05	3.83549e-05	0.000118876	7.197e-05	0.000151455	0.000125698	0.000121212	9.62326e-05	8.91347e-05	9.83492e-05	0.000187621	5.75586e-05	7.36845e-05	0.000235984	7.94919e-05	9.81602e-05	6.24665e-05	4.97592e-05	3.02178e-05	0.000117414	0.000118595	3.62033e-05	6.96132e-05	7.13814e-05	9.02155e-05	6.69403e-05	0.000682363	0.0012243	0.000247854
68.9261	9.40641e-05	6.7084e-05	0.000153386	9.36139e-05	6.83215e-05	5.96361e-05	6.15599e-05	5.78902e-05	7.61157e-05	8.45618e-05	5.58581e-05	0.00100336	4.58988e-05	0.000125342	0.000203097	8.30132e-06	7.91519e-05	9.62614e-05	0.000106535	0.000140644	4.56727e-05	3.43928e-05	0.000106195	6.39088e-05	0.000137986	0.000111771	0.000108719	8.82775e-05	7.97169e-05	8.87979e-05	0.000168226	5.22146e-05	6.60664e-05	0.000209699	7.05251e-05	8.5548e-05	5.62626e-05	4.35806e-05	2.74798e-05	0.000104904	0.000107888	3.3222e-05	6.09863e-05	6.71722e-05	8.11242e-05	6.03625e-05	0.000622063	0.00111514	0.000226229
75.6463	8.38308e-05	5.94891e-05	0.000139471	8.49721e-05	6.13777e-05	5.41283e-05	5.48786e-05	5.16284e-05	7.01931e-05	7.62864e-05	4.95134e-05	0.00092017	4.09693e-05	0.000114736	0.000172455	7.5665e-06	7.12067e-05	8.65918e-05	9.44612e-05	0.000127494	4.09908e-05	3.0907e-05	9.49056e-05	5.68658e-05	0.000125605	9.9599e-05	9.75386e-05	8.10159e-05	7.14138e-05	8.0242e-05	0.000150879	4.73405e-05	5.92849e-05	0.000185994	6.26176e-05	7.47372e-05	5.07134e-05	3.82353e-05	2.49699e-05	9.37302e-05	9.81647e-05	3.04806e-05	5.3475e-05	6.3086e-05	7.29951e-05	5.452e-05	0.000565857	0.001014	0.000206323
83.0218	7.49182e-05	5.30083e-05	0.000126693	7.71985e-05	5.51662e-05	4.91311e-05	4.89443e-05	4.61089e-05	6.46865e-05	6.87659e-05	4.39574e-05	0.0008414	3.66371e-05	0.000104959	0.000146993	6.89651e-06	6.41479e-05	7.7834e-05	8.38148e-05	0.000115463	3.69132e-05	2.78312e-05	8.48553e-05	5.06962e-05	0.000114255	8.89351e-05	8.75282e-05	7.43724e-05	6.40735e-05	7.25658e-05	0.000135394	4.29038e-05	5.3246e-05	0.000164704	5.56525e-05	6.54608e-05	4.57438e-05	3.36055e-05	2.26744e-05	8.37583e-05	8.93401e-05	2.79584e-05	4.69322e-05	5.91312e-05	6.5718e-05	4.93038e-05	0.000513802	0.000920785	0.000188046
91.1163	6.71119e-05	4.74362e-05	0.00011498	7.01963e-05	4.96051e-05	4.45958e-05	4.36701e-05	4.12371e-05	5.95686e-05	6.19487e-05	3.90841e-05	0.000767419	3.28162e-05	9.59603e-05	0.000125778	6.28569e-06	5.78599e-05	6.99188e-05	7.44239e-05	0.000104486	3.33322e-05	2.51086e-05	7.59086e-05	4.52778e-05	0.000103876	7.95679e-05	7.85622e-05	6.82828e-05	5.75676e-05	6.5669e-05	0.000121588	3.88717e-05	4.78654e-05	0.000145654	4.95203e-05	5.74877e-05	4.12882e-05	2.95898e-05	2.05796e-05	7.48652e-05	8.13337e-05	2.5637e-05	4.12305e-05	5.53169e-05	5.91977e-05	4.46281e-05	0.000465848	0.000835227	0.000171299
100	6.0241e-05	4.26078e-05	0.000104265	6.38797e-05	4.46234e-05	4.04795e-05	3.89807e-05	3.69307e-05	5.48151e-05	5.57826e-05	3.48023e-05	0.000698423	2.94364e-05	8.76911e-05	0.000108036	5.72881e-06	5.22448e-05	6.27791e-05	6.61354e-05	9.44951e-05	3.01639e-05	2.26909e-05	6.79431e-05	4.05071e-05	9.44003e-05	7.13169e-05	7.05304e-05	6.26927e-05	5.17873e-05	5.94642e-05	0.000109286	3.52123e-05	4.30677e-05	0.000128666	4.41204e-05	5.06197e-05	3.72896e-05	2.61006e-05	1.86712e-05	6.6938e-05	7.40692e-05	2.35006e-05	3.6259e-05	5.16515e-05	5.33508e-05	4.04238e-05	0.000421874	0.00075698	0.000155981
[truncated: 228 more columns]

## Sheet: Supplement 1C Free Halo
diff_coef_value	Cell1	Cell2	Cell3	Cell4	Cell5	Cell6	Cell7	Cell8	Cell9	Cell10	Cell11	Cell12	Cell13	Cell14	Cell15	Cell16	Cell17	Cell18	Cell19	Cell20	Cell21	Cell22	Cell23	Cell24	Cell25	Cell26	Cell27	Cell28	Cell29	Cell30	Cell31	Cell32	Cell33	Cell34	Cell35	Cell36	Cell37	Cell38	Cell39	Cell40	Cell41	Cell42	Cell43	Cell44	Cell45	Cell46	Cell47	Cell48	Cell49
0.01	0.453545	0.00181337	0.00666454	0.00157268	0.00531858	0.00434249	0.00248388	0.150865	0.356942	0.00248622	0.00249218	0.00175423	0.000618395	0.0619919	0.00206828	0.000409492	1.40152e-10	0.00974007	9.45472e-05	0.322661	0.000153613	0.000541143	0.000974111	0.00298998	0.00121279	0.107014	0.000268663	0.13921	0.000532612	0.00357484	0.00647291	0.00383778	0.0120389	0.0039906	0.13853	0.000225829	7.97907e-05	0.00130241	0.00322341	0.00955228	0.420505	0.00037716	0.0339626	0.000700771	0.0299682	0.0257439	0.000148352	0.0512025	0.000297839
0.010975	0.0926596	0.00178236	0.00662422	0.0015772	0.00542396	0.00445589	0.00244276	0.108196	0.134674	0.00252423	0.00251681	0.00175921	0.000620194	0.0536848	0.00207549	0.000410994	1.44537e-10	0.00985997	9.53475e-05	0.0738486	0.000154543	0.000547795	0.000977801	0.00295829	0.00123616	0.0936997	0.000269628	0.0526677	0.000533045	0.00353432	0.0065146	0.00375002	0.012657	0.00399659	0.0905708	0.000227015	8.04722e-05	0.0013065	0.00323233	0.00910477	0.0919214	0.000378639	0.0338005	0.00070305	0.0180542	0.0256139	0.000149009	0.0270158	0.000299474
0.012045	0.0427153	0.00174837	0.00657182	0.00158217	0.00547486	0.00456709	0.00239899	0.0852969	0.0878651	0.00256632	0.00254158	0.00176471	0.000622182	0.047578	0.00208335	0.000412627	1.49492e-10	0.00999305	9.62312e-05	0.0347924	0.000155567	0.000555125	0.000981846	0.00292669	0.00126132	0.0827358	0.000270692	0.0336166	0.000533518	0.00349344	0.00654669	0.00366692	0.0133286	0.00400277	0.0680458	0.000228322	8.12249e-05	0.001311	0.00324217	0.00867058	0.0394526	0.000380263	0.0336204	0.00070553	0.0133475	0.0254706	0.000149732	0.0193932	0.000301274
0.0132194	0.0243734	0.0017116	0.00650744	0.00158764	0.00547607	0.00467392	0.00235264	0.0701588	0.0645987	0.00261298	0.00256621	0.00177079	0.000624382	0.0428094	0.00209192	0.000414401	1.55105e-10	0.0101408	9.72078e-05	0.0207716	0.000156697	0.000563204	0.000986279	0.00289541	0.00128836	0.0732832	0.000271864	0.0259919	0.000534034	0.00345249	0.006568	0.00358911	0.0140028	0.0040091	0.0550669	0.000229761	8.20568e-05	0.00131596	0.00325301	0.00825019	0.0230354	0.000382049	0.0334205	0.000708228	0.0106218	0.0253128	0.000150529	0.0156187	0.000303258
0.0145083	0.0154126	0.00167232	0.00643117	0.00159367	0.0054377	0.00477395	0.00230381	0.0592732	0.0504257	0.00266468	0.00259039	0.0017775	0.000626814	0.0388487	0.00210127	0.000416324	1.61483e-10	0.0103051	9.82874e-05	0.0138888	0.000157941	0.000572112	0.000991136	0.00286469	0.00131734	0.0650116	0.000273156	0.0216015	0.000534599	0.00341183	0.00657733	0.00351708	0.0145925	0.0040155	0.0462231	0.000231348	8.29766e-05	0.00132142	0.00326497	0.00784378	0.0157208	0.000384012	0.0331989	0.000711159	0.00879474	0.0251394	0.000151407	0.0131236	0.000305445
0.0159228	0.0104321	0.00163084	0.00634332	0.00160031	0.00537082	0.00486452	0.00225265	0.0510277	0.0409482	0.002722	0.00261373	0.00178492	0.000629504	0.0353974	0.00211145	0.000418407	1.68756e-10	0.0104877	9.9482e-05	0.00992122	0.000159315	0.000581938	0.000996458	0.00283479	0.00134833	0.0578261	0.00027458	0.0188982	0.00053522	0.0033718	0.00657369	0.00345134	0.0149818	0.00402193	0.0398883	0.000233097	8.39945e-05	0.00132744	0.00327817	0.00745127	0.0115565	0.000386169	0.0329539	0.000714343	0.0074696	0.0249489	0.000152375	0.0113355	0.000307856
0.0174753	0.00749555	0.00158754	0.00624421	0.00160764	0.00528391	0.00494291	0.00219936	0.0444842	0.034144	0.00278551	0.00263568	0.00179313	0.00063248	0.0322873	0.00212253	0.000420658	1.77075e-10	0.0106908	0.000100805	0.00742881	0.000160831	0.000592782	0.00100228	0.00280597	0.00138134	0.051657	0.00027615	0.0167496	0.000535902	0.00333283	0.00655645	0.00339228	0.0150593	0.00402829	0.0347608	0.000235027	8.51217e-05	0.00133409	0.00329275	0.00707221	0.00882004	0.000388541	0.0326835	0.000717797	0.0064612	0.0247401	0.000153442	0.00996424	0.000310516
0.0191791	0.00570579	0.00154282	0.00613411	0.00161571	0.00518082	0.00500625	0.00214419	0.039119	0.0289763	0.00285588	0.00265569	0.00180222	0.000635769	0.0294251	0.00213459	0.000423087	1.86628e-10	0.0109168	0.00010227	0.00578464	0.000162504	0.000604756	0.00100866	0.00277852	0.0014164	0.046405	0.000277881	0.0150776	0.000536657	0.00329538	0.00652504	0.00334025	0.0147693	0.00403448	0.0300643	0.000237157	8.63711e-05	0.00134142	0.00330887	0.00670606	0.00690289	0.000391148	0.0323858	0.000721542	0.00566008	0.0245115	0.000154619	0.00885849	0.000313452
0.021049	0.00458767	0.00149706	0.00601327	0.00162463	0.00506116	0.00505185	0.00208743	0.0346209	0.0248876	0.00293381	0.00267309	0.00181229	0.000639403	0.026762	0.00214771	0.000425703	1.97645e-10	0.0111681	0.000103896	0.00464622	0.000164353	0.000617983	0.00101565	0.00275274	0.00145346	0.0419291	0.000279788	0.0137302	0.000537493	0.00325995	0.00647933	0.00329552	0.0141468	0.0040404	0.0259693	0.000239509	8.77572e-05	0.00134951	0.00332671	0.0063521	0.00551275	0.000394016	0.032059	0.0007256	0.00500173	0.0242619	0.000155919	0.00792743	0.000316694
0.0231013	0.00387132	0.00145071	0.00588184	0.00163447	0.00492171	0.00507721	0.00202941	0.0307904	0.0215563	0.00302003	0.00268716	0.00182346	0.000643413	0.0242753	0.00216197	0.000428516	2.10406e-10	0.0114474	0.0001057	0.00383466	0.000166398	0.0006326	0.00102328	0.00272896	0.00149244	0.0380529	0.000281891	0.012616	0.000538426	0.00322711	0.00641926	0.00325829	0.0133056	0.00404591	0.0224048	0.000242108	8.92963e-05	0.00135846	0.00334646	0.00600955	0.00449512	0.00039717	0.0317012	0.000729992	0.00444765	0.02399	0.000157354	0.00711806	0.000320276
0.0253536	0.00340069	0.00140414	0.00573998	0.00164535	0.00475852	0.00508025	0.00197051	0.0274924	0.0187832	0.00311531	0.00269722	0.00183584	0.00064783	0.0219571	0.00217747	0.000431536	2.2526e-10	0.0117574	0.000107706	0.00323829	0.000168659	0.000648761	0.00103163	0.00270753	0.00153318	0.0345899	0.000284207	0.0116719	0.000539469	0.00319745	0.00634508	0.00322871	0.0123867	0.00405087	0.0193159	0.00024498	9.10073e-05	0.00136835	0.00336835	0.00567763	0.00374406	0.00040064	0.0313109	0.000734742	0.00397356	0.0236946	0.000158941	0.00639932	0.000324237
0.0278256	0.00308438	0.00135779	0.00558785	0.00165739	0.00456904	0.00505947	0.00191113	0.0246299	0.0164384	0.00322045	0.0027026	0.00184958	0.000652686	0.019806	0.00219431	0.000434779	2.42643e-10	0.0121005	0.000109937	0.00278676	0.000171163	0.000666634	0.00104076	0.00268883	0.00157547	0.0313751	0.000286757	0.0108557	0.000540643	0.00317166	0.00625722	0.00320686	0.0115038	0.00405512	0.0166511	0.000248158	9.29116e-05	0.00137929	0.00339263	0.0053557	0.00319168	0.000404459	0.0308865	0.000739876	0.00356325	0.0233745	0.000160695	0.00575264	0.000328619
0.0305386	0.00286871	0.00131201	0.00542571	0.00167072	0.00435356	0.00501406	0.00185171	0.0221311	0.0144328	0.00333625	0.00270272	0.00186481	0.00065801	0.0178225	0.0022126	0.000438264	2.631e-10	0.0124789	0.000112423	0.00244319	0.000173937	0.000686406	0.00105073	0.00267331	0.001619	0.0283018	0.000289565	0.0101426	0.000541971	0.00315044	0.00615625	0.00319271	0.0107184	0.0040585	0.0143738	0.000251677	9.50337e-05	0.00139141	0.00341958	0.00504326	0.00276847	0.000408662	0.0304269	0.000745421	0.0032054	0.0230289	0.000162636	0.00516689	0.000333471
0.033516	0.00272968	0.00126718	0.00525389	0.00168549	0.00411551	0.00494403	0.00179269	0.0199402	0.0127026	0.00346346	0.00269709	0.00188168	0.000663824	0.0160051	0.00223247	0.00044202	2.87324e-10	0.0128945	0.000115195	0.00217103	0.000177013	0.000708282	0.00106163	0.00266141	0.00166333	0.0253365	0.000292654	0.00951736	0.000543479	0.00313458	0.0060428	0.00318611	0.0100364	0.00406082	0.0124462	0.000255576	9.74018e-05	0.00140484	0.0034495	0.00474004	0.00244992	0.000413289	0.029931	0.000751407	0.00289174	0.0226571	0.000164787	0.00463502	0.000338848
0.0367838	0.00263487	0.00122365	0.00507303	0.00170188	0.00386102	0.0048502	0.00173453	0.0180132	0.0112005	0.00360281	0.00268539	0.00190036	0.000670147	0.0143496	0.00225405	0.000446097	3.16198e-10	0.0133481	0.000118292	0.00194328	0.000180427	0.000732482	0.00107352	0.00265359	0.00170792	0.0225058	0.000296048	0.0089666	0.000545201	0.00312488	0.00591766	0.00318682	0.0094212	0.00406191	0.0108197	0.0002599	0.000100048	0.00141974	0.00348273	0.00444608	0.00219461	0.000418385	0.0293981	0.000757866	0.00261615	0.0222586	0.000167171	0.00415249	0.000344811
0.0403702	0.00258122	0.00118176	0.0048839	0.00172009	0.00359761	0.00473425	0.00167769	0.0163144	0.00989029	0.00375495	0.0026674	0.00192099	0.000676985	0.0128482	0.00227751	0.000450574	3.50861e-10	0.0138396	0.000121757	0.0017544	0.000184221	0.000759245	0.00108651	0.00265024	0.00175211	0.0198625	0.000299776	0.00846632	0.000547174	0.00312222	0.00578164	0.00319435	0.00881549	0.00406157	0.00944587	0.0002647	0.00010301	0.00143628	0.00351961	0.00416166	0.00199026	0.000423996	0.0288282	0.000764834	0.00237396	0.0218334	0.000169816	0.0037159	0.000351432
0.0443062	0.00256431	0.00114187	0.00468759	0.00174034	0.00333278	0.0045986	0.00162262	0.0148142	0.0087429	0.00392038	0.00264299	0.00194371	0.000684331	0.0114905	0.00230302	0.000455586	3.92795e-10	0.0143676	0.00012564	0.00159627	0.00018844	0.000788826	0.00110072	0.0026516	0.00179508	0.0174537	0.000303866	0.00797243	0.000549441	0.00312742	0.00563567	0.00320804	0.00816827	0.00405965	0.00828167	0.000270035	0.000106332	0.00145463	0.00356052	0.00388728	0.00182387	0.000430175	0.0282213	0.00077235	0.00216155	0.0213816	0.000172756	0.00332238	0.00035879
0.048626	0.00258403	0.00110431	0.00448536	0.00176286	0.00307322	0.00444627	0.00156979	0.0134881	0.00773442	0.00409948	0.00261217	0.00196866	0.000692164	0.0102645	0.00233079	0.000461353	4.43941e-10	0.0149291	0.000129999	0.00146341	0.000193138	0.000821485	0.00111627	0.00265755	0.00183587	0.0153061	0.000308349	0.00743068	0.000552055	0.00314132	0.0054808	0.00322696	0.00746037	0.00405598	0.00729097	0.00027597	0.000110062	0.00147501	0.00360581	0.00362357	0.0016864	0.000436977	0.0275781	0.000780461	0.00197615	0.0209039	0.000176026	0.00296926	0.000366977
0.053367	0.00264421	0.00106947	0.00427875	0.00178794	0.00282415	0.00428075	0.00151961	0.0123152	0.00684464	0.00429242	0.00257504	0.00199591	0.000700438	0.00915811	0.00236104	0.000468231	5.06872e-10	0.0155195	0.000134903	0.0013521	0.000198377	0.000857489	0.00113336	0.00266748	0.00187344	0.013424	0.000313258	0.00681164	0.000555072	0.00316462	0.0053183	0.00324987	0.00671069	0.00405044	0.00644346	0.000282581	0.000114261	0.00149763	0.00365582	0.00337118	0.0015717	0.000444461	0.0268998	0.000789217	0.0018156	0.0204016	0.000179669	0.00265386	0.000376096
0.0585702	0.00275119	0.00103772	0.00406941	0.00181585	0.00258935	0.0041057	0.0014725	0.0112775	0.00605614	0.00449921	0.0025319	0.00202551	0.000709089	0.00816007	0.00239407	0.000476798	5.85028e-10	0.0161324	0.000140429	0.00125966	0.000204227	0.000897095	0.00115223	0.00268006	0.00190664	0.0117955	0.000318629	0.00613673	0.000558557	0.00319785	0.00514965	0.00327521	0.00596226	0.00404293	0.00571401	0.000289955	0.000118998	0.00152273	0.00371084	0.00313061	0.00147522	0.000452686	0.0261879	0.000798678	0.00167819	0.019876	0.000183733	0.00237343	0.000386269
0.0642807	0.00291119	0.00100945	0.00385918	0.00184689	0.00237138	0.00392491	0.00142885	0.0103597	0.0053542	0.00471963	0.00248327	0.00205743	0.000718022	0.00726129	0.00243016	0.000487966	6.83061e-10	0.0167591	0.000146672	0.00118427	0.000210767	0.000940544	0.00117325	0.00269304	0.0019343	0.0103988	0.0003245	0.00545856	0.00056258	0.00324125	0.00497664	0.00330108	0.00526002	0.00403342	0.00508183	0.000298194	0.000124352	0.00155054	0.00377109	0.0029022	0.00139369	0.000461708	0.0254448	0.000808916	0.00156254	0.0193293	0.000188274	0.00212523	0.000397633
0.070548	0.00311779	0.000985108	0.00365004	0.00188134	0.0021718	0.003742	0.00138903	0.00954794	0.0047266	0.00495328	0.00242991	0.00209159	0.000727117	0.00645491	0.00246966	0.000503164	8.07319e-10	0.0173896	0.000153741	0.00112469	0.000218092	0.000988039	0.00119696	0.0027032	0.00195526	0.00920761	0.000330916	0.00482335	0.000567219	0.00329465	0.00480142	0.00332531	0.00463605	0.00402192	0.00452986	0.000307412	0.00013042	0.00158131	0.00383665	0.00268605	0.0013247	0.000471583	0.0246733	0.000820011	0.00146753	0.018764	0.000193358	0.00190654	0.000410348
0.0774264	0.00332792	0.00096513	0.00344409	0.00191946	0.00199145	0.00356038	0.00135337	0.00882948	0.00416363	0.00519964	0.00237278	0.00212777	0.000736227	0.00573614	0.00251297	0.000524598	9.66593e-10	0.018012	0.000161764	0.00108006	0.000226309	0.00103972	0.00122419	0.00270646	0.00196847	0.0081944	0.000337923	0.00425507	0.000572553	0.00335729	0.00462648	0.0033455	0.00410594	0.00400853	0.00404426	0.000317745	0.000137314	0.00161526	0.00390747	0.00248199	0.00126633	0.000482353	0.0238769	0.000832061	0.00139222	0.0181832	0.000199058	0.00171477	0.000424598
0.0849753	0.00345051	0.000950008	0.00324361	0.00196148	0.00183065	0.00338314	0.00132218	0.00819255	0.00365802	0.00545814	0.00231292	0.0021657	0.000745175	0.00510159	0.0025605	0.000555643	1.17314e-09	0.0186136	0.000170896	0.00104999	0.000235545	0.00109563	0.00125622	0.00269823	0.00197311	0.00733276	0.000345576	0.00375953	0.00057867	0.00342771	0.00445466	0.00335923	0.00367188	0.00399344	0.00361397	0.000329351	0.000145168	0.00165261	0.00398329	0.0022897	0.00121716	0.000494052	0.0230594	0.000845178	0.00133577	0.0175903	0.000205463	0.00154747	0.000440599
0.0932603	0.00340876	0.000940261	0.00305118	0.00200753	0.00168931	0.00321297	0.00129574	0.00762588	0.00320441	0.0057283	0.00225138	0.00220496	0.000753765	0.00454845	0.00261266	0.000601387	1.4443e-09	0.0191824	0.000181317	0.00103449	0.000245945	0.00115572	0.00129501	0.00267415	0.0019686	0.00659812	0.000353934	0.00333298	0.000585657	0.00350357	0.00428911	0.00336412	0.00332748	0.00397692	0.00323006	0.000342412	0.000154142	0.00169353	0.00406362	0.00210885	0.00117604	0.000506695	0.0222252	0.000859494	0.00129738	0.0169893	0.000212671	0.0014024	0.000458601
0.102353	0.00324153	0.000936455	0.00286987	0.00205764	0.0015671	0.00305222	0.00127432	0.00711877	0.00279891	0.00600983	0.0021893	0.00224502	0.000761779	0.00407384	0.00266987	0.000669417	1.80485e-09	0.0197085	0.000193246	0.00103395	0.000257681	0.00121977	0.00134352	0.0026309	0.00195475	0.00596842	0.000363066	0.00296789	0.000593602	0.00358161	0.00413326	0.00335815	0.00306198	0.00395938	0.00288524	0.000357146	0.000164428	0.00173816	0.00414773	0.00193916	0.00114216	0.000520275	0.0213786	0.000875158	0.00127627	0.0163844	0.000220797	0.00127747	0.000478899
0.112332	0.0030589	0.000939176	0.00270382	0.00211169	0.00146347	0.0029029	0.00125814	0.00666112	0.00243835	0.00630279	0.00212823	0.00228528	0.000768992	0.00367432	0.00273251	0.000770901	2.29074e-09	0.0201868	0.000206942	0.00104896	0.000270956	0.00128738	0.00140611	0.0025672	0.00193177	0.00542411	0.000373048	0.00265588	0.000602595	0.00365764	0.00399075	0.00333969	0.00286298	0.0039413	0.00257329	0.000373808	0.000176254	0.00178658	0.00423461	0.00178062	0.00111496	0.000534765	0.0205236	0.000892339	0.00127163	0.0157802	0.000229972	0.00117078	0.000501842
0.123285	0.00278304	0.000948985	0.00255934	0.0021694	0.00137776	0.00276668	0.00124742	0.00624368	0.00211977	0.00660757	0.00207052	0.00232504	0.000775171	0.00334573	0.00280092	0.000922054	2.95454e-09	0.0206196	0.00022272	0.0010802	0.000286007	0.00135795	0.00148902	0.00248432	0.00190029	0.00494828	0.000383965	0.00238894	0.000612726	0.00372669	0.00386533	0.00330764	0.00271806	0.00392329	0.0022889	0.000392702	0.000189899	0.00183876	0.00432301	0.00163346	0.00109436	0.000550115	0.0196629	0.000911223	0.00128257	0.0151816	0.000240345	0.00108055	0.000527842
0.135305	0.0023556	0.00096635	0.00244652	0.0022303	0.00130928	0.00264501	0.00124239	0.00585825	0.00184007	0.00692491	0.00201973	0.00236351	0.000780094	0.00308332	0.00287531	0.0011461	3.87438e-09	0.0210175	0.000240957	0.0011281	0.000303118	0.00143069	0.00160086	0.00238609	0.00186137	0.00452673	0.000395912	0.00215985	0.000624082	0.0037833	0.00376065	0.00326148	0.00261582	0.00390607	0.00202788	0.000414187	0.000205697	0.00189461	0.00441144	0.00149818	0.00108087	0.000566256	0.0187977	0.000932007	0.00130812	0.0145937	0.000252082	0.00100514	0.00055739
0.148497	0.00195861	0.000991539	0.00238113	0.00229369	0.00125732	0.00253911	0.00124323	0.00549793	0.00159591	0.00725558	0.00198061	0.00239992	0.000783553	0.00288194	0.00295583	0.0014758	5.16757e-09	0.0214003	0.000262111	0.00119248	0.000322626	0.00150458	0.00175312	0.00227837	0.00181641	0.00414806	0.000408994	0.00196232	0.000636753	0.0038221	0.0036801	0.00320121	0.00254637	0.00389041	0.00178754	0.000438688	0.000224057	0.00195396	0.00449826	0.00137535	0.0010758	0.000583112	0.0179265	0.000954895	0.00134719	0.0140216	0.000265373	0.000943027	0.000591071
0.162975	0.00165701	0.00102452	0.00238598	0.00235868	0.00122122	0.00245001	0.00125017	0.00515722	0.00138376	0.00760018	0.00195875	0.00243348	0.000785367	0.00273639	0.00304249	0.00195638	7.01267e-09	0.0217925	0.000286741	0.00127211	0.000344938	0.00157846	0.00196052	0.00216797	0.00176702	0.00380376	0.000423325	0.00179106	0.000650832	0.00383839	0.00362675	0.00312744	0.00250166	0.00387715	0.00156695	0.000466711	0.000245479	0.00201652	0.00458174	0.0012655	0.00108147	0.000600607	0.0170453	0.000980089	0.00139864	0.0134707	0.00028043	0.000892833	0.000629589
0.178865	0.00143283	0.0010649	0.00249076	0.0024242	0.00120038	0.00237855	0.00126346	0.00483202	0.00120006	0.00795877	0.00196007	0.00246348	0.000785389	0.00264177	0.00313522	0.00264775	9.68453e-09	0.0222186	0.000315529	0.00136449	0.000370543	0.00165108	0.00224132	0.00206163	0.001715	0.00348812	0.000439029	0.00164188	0.000666417	0.00382898	0.00360358	0.00304141	0.00247555	0.00386712	0.00136684	0.00049885	0.000270573	0.00208194	0.00466019	0.00116898	0.00110157	0.000618683	0.0161479	0.00100778	0.00146124	0.0129465	0.000297492	0.00085331	0.000673781
0.196304	0.00124975	0.00111191	0.0027302	0.00248901	0.00119422	0.00232535	0.00128335	0.00451947	0.00104129	0.00833074	0.00199034	0.0024893	0.000783521	0.00259378	0.00323391	0.00362381	1.36115e-08	0.0226937	0.000349313	0.00146553	0.000400032	0.00172118	0.00261744	0.00196512	0.00166207	0.00319778	0.00045624	0.00151163	0.000683621	0.00379288	0.00361419	0.00294516	0.00246383	0.00386114	0.00118896	0.000535804	0.000300095	0.00214981	0.00473209	0.00108582	0.00114153	0.000637315	0.0152262	0.00103815	0.00153382	0.0124543	0.000316827	0.000823374	0.000724637
0.215443	0.00111397	0.00116455	0.0031406	0.00255177	0.00120209	0.00229071	0.00131019	0.00421772	0.000903972	0.00871506	0.00205496	0.00251047	0.000779716	0.00258908	0.00333846	0.00496475	1.94691e-08	0.0232165	0.000389126	0.00156887	0.000434115	0.00178753	0.00311478	0.00188275	0.00160989	0.00293102	0.000475099	0.00139789	0.000702573	0.00373191	0.00366385	0.00284158	0.00246397	0.00385992	0.00103515	0.000578383	0.00033498	0.00221968	0.00479627	0.00101578	0.00120924	0.000656532	0.0142726	0.00107134	0.00161537	0.0119994	0.000338739	0.000802108	0.00078332
0.236449	0.0010245	0.00122185	0.003752	0.0026111	0.00122317	0.00227441	0.00134434	0.00392573	0.000784613	0.00911097	0.00215924	0.00252672	0.000773985	0.0026255	0.00344888	0.00673889	2.83341e-08	0.0237625	0.000436252	0.00166538	0.000473645	0.00184892	0.00376401	0.00181724	0.00155986	0.00268688	0.000495753	0.00129864	0.000723435	0.00365116	0.00376046	0.00273441	0.00247477	0.00386402	0.000906569	0.000627526	0.000376394	0.00229113	0.00485215	0.000958416	0.00131593	0.000676424	0.0132815	0.00110749	0.00170504	0.0115873	0.000363573	0.000788782	0.000851166
0.259502	0.000976777	0.00128324	0.00455904	0.00266566	0.00125632	0.00227557	0.00138621	0.00364307	0.000679816	0.00951914	0.00230892	0.00253803	0.000766412	0.00270236	0.00356538	0.0089699	4.19411e-08	0.0242827	0.000492291	0.00174525	0.000519618	0.00190407	0.00460314	0.00176986	0.00151312	0.00246443	0.000518351	0.00121196	0.000746419	0.00355904	0.00391503	0.00262776	0.00249595	0.0038738	0.000803242	0.000684308	0.000425794	0.00236378	0.00490001	0.000913165	0.00147704	0.000697156	0.0122516	0.00114667	0.00180207	0.0112229	0.000391729	0.000782875	0.000929675
0.284804	0.000993476	0.00134887	0.00541832	0.00271428	0.00130008	0.00229243	0.00143615	0.0033698	0.000586504	0.0099432	0.00251109	0.00254469	0.000757151	0.00282038	0.00368846	0.011581	6.31127e-08	0.0247075	0.000559242	0.00180292	0.000573178	0.00195138	0.00568343	0.00174073	0.00147051	0.00226229	0.000543041	0.00113608	0.000771808	0.00346718	0.00414105	0.00252549	0.00252764	0.00388939	0.000724079	0.000749959	0.000485013	0.00243735	0.00494135	0.00087944	0.00171026	0.000718969	0.0111868	0.00118899	0.0019051	0.0109104	0.000423671	0.000784109	0.00102049
0.312572	0.00107682	0.00141991	0.00587208	0.0027561	0.00135266	0.00232236	0.00149436	0.00310625	0.00050231	0.0103911	0.002775	0.00254729	0.000746442	0.00298134	0.00381896	0.0143042	9.64809e-08	0.0249562	0.000639598	0.00184161	0.000635587	0.00198889	0.00708002	0.00172918	0.00143253	0.00207856	0.000569967	0.0010696	0.000799996	0.00339022	0.00445267	0.00243035	0.00256999	0.00391059	0.000667151	0.000825891	0.000556345	0.00251168	0.00497944	0.000856688	0.00202381	0.000742173	0.0100973	0.00123448	0.00201098	0.0106533	0.000459956	0.000792489	0.00112535
0.343047	0.00124105	0.00149847	0.00545006	0.00279086	0.00141213	0.00236194	0.00156069	0.0028528	0.00042588	0.0108761	0.00311189	0.00254685	0.00073462	0.00318695	0.00395807	0.0165729	1.49709e-07	0.0249509	0.000736451	0.00187345	0.000708168	0.00201421	0.0089063	0.00173403	0.0013994	0.0019109	0.000599267	0.00101182	0.000831538	0.00334557	0.0048621	0.00234356	0.00262281	0.00393691	0.00063014	0.000913736	0.000642654	0.00258672	0.00501993	0.000844393	0.00238507	0.000767131	0.00899912	0.00128324	0.00211304	0.0104533	0.000501252	0.000808341	0.00124602
0.376494	0.00149809	0.00158723	0.00444042	0.00281938	0.00147678	0.00240733	0.00163452	0.00260955	0.000356911	0.0114162	0.00353247	0.00254479	0.000722131	0.00343689	0.00410728	0.0175594	2.35561e-07	0.0246315	0.000853578	0.00191574	0.00079222	0.00202498	0.0113271	0.00175389	0.00137116	0.00175687	0.000631071	0.000962891	0.000867211	0.00335366	0.00537592	0.00226486	0.00268543	0.00396752	0.000610783	0.00101543	0.000747471	0.00266263	0.00507182	0.000842073	0.00268199	0.000794249	0.00791198	0.0013354	0.00219972	0.0103101	0.000548387	0.000832364	0.00138421
0.413201	0.00182614	0.00168899	0.00342146	0.00284445	0.00154546	0.00245473	0.00171463	0.00237602	0.000295844	0.0120333	0.00404113	0.00254304	0.000709556	0.00372632	0.00426818	0.0166808	3.75412e-07	0.023967	0.000995479	0.0019867	0.000888901	0.00201948	0.0145636	0.0017873	0.00134784	0.00161421	0.000665509	0.000923795	0.000908092	0.00343893	0.00599067	0.00219311	0.00275658	0.00400128	0.000607262	0.00113336	0.000875064	0.00273968	0.00514844	0.000849267	0.00275205	0.000823947	0.00685757	0.0013912	0.00225477	0.0102213	0.000602385	0.000865684	0.0015415
0.453488	0.00212006	0.00180611	0.00262654	0.00287236	0.00161794	0.00250088	0.00179924	0.00215124	0.000243329	0.0127497	0.00462708	0.00254402	0.000697644	0.0040434	0.00444225	0.0142912	6.05207e-07	0.0229618	0.00116734	0.00210218	0.000999088	0.0019976	0.0188812	0.00183284	0.00132979	0.0014811	0.000702722	0.000896224	0.000955624	0.00363227	0.00668762	0.00212725	0.00283447	0.00403676	0.000618498	0.00127056	0.00103045	0.00281831	0.00526858	0.000865557	0.00252737	0.000856647	0.00585693	0.00145117	0.00226072	0.0101816	0.000664532	0.000909892	0.00171919
0.497702	0.00222777	0.00194034	0.00206483	0.00291546	0.0016953	0.00254356	0.00188625	0.00193396	0.000199726	0.0135841	0.00525483	0.00255067	0.000687363	0.00436792	0.00463067	0.0114202	9.85573e-07	0.0216534	0.00137487	0.00227246	0.00112324	0.00196141	0.0245387	0.00188921	0.00131792	0.00135627	0.000742882	0.000882466	0.00101166	0.00397521	0.00742839	0.00206705	0.00291703	0.00407227	0.000644392	0.00143116	0.00121933	0.00289918	0.00545722	0.000890599	0.00212885	0.000892758	0.00492828	0.00151635	0.00220633	0.0101833	0.000736442	0.000967032	0.00191823
0.546228	0.00210893	0.00209289	0.00169064	0.0029959	0.00178001	0.00258225	0.00197357	0.0017233	0.00016481	0.0145448	0.00585944	0.00256642	0.000679956	0.00467213	0.00483401	0.0088962	1.6189e-06	0.0201049	0.00162399	0.00249343	0.00126128	0.00191544	0.0316093	0.00195516	0.00131393	0.00123902	0.000786217	0.0008856	0.00107846	0.00452575	0.00815524	0.00201329	0.00300211	0.00410596	0.000686019	0.00162092	0.0014479	0.00298314	0.00574548	0.000924174	0.00174057	0.000932673	0.00408547	0.00158862	0.00209504	0.0102166	0.000820124	0.00103948	0.00213911
0.599484	0.00187611	0.00226477	0.00145772	0.00315066	0.00187607	0.0026189	0.00205961	0.00151921	0.000137747	0.0156225	0.00635846	0.00259511	0.000677024	0.00492414	0.00505216	0.00706466	2.67816e-06	0.0183933	0.00192033	0.00272925	0.00141254	0.00186603	0.039377	0.00202952	0.00132031	0.00112907	0.000833039	0.000910091	0.00115859	0.00536558	0.00880075	0.00196743	0.00308788	0.00413591	0.000745831	0.00184819	0.00172249	0.00307141	0.00616933	0.000966242	0.00145492	0.000976769	0.00333715	0.00167135	0.00194734	0.0102697	0.000918044	0.00112966	0.00238179
0.657933	0.00165154	0.00245709	0.00132956	0.00343689	0.00198894	0.002659	0.00214355	0.00132288	0.000117278	0.0167827	0.00669291	0.00264087	0.00068061	0.00509385	0.00528426	0.00597041	4.45522e-06	0.0165983	0.00226866	0.00289744	0.0015757	0.00182026	0.0449992	0.00211123	0.00134029	0.00102645	0.000883776	0.000962798	0.00125475	0.00660845	0.00930709	0.00193094	0.00317318	0.00416021	0.000827845	0.00212522	0.00204918	0.00316569	0.00676654	0.00101699	0.00127347	0.00102543	0.00268669	0.00177014	0.00179373	0.0103298	0.00103316	0.00123963	0.00264566
0.722081	0.00148285	0.00267071	0.00127945	0.00393563	0.00212565	0.00271292	0.00222548	0.00113661	0.000101979	0.0179598	0.00688065	0.00270794	0.000693283	0.00515982	0.00552886	0.00554103	7.44157e-06	0.0147933	0.00267221	0.0028983	0.00174894	0.00178476	0.0446974	0.0021993	0.00137773	0.000931319	0.000938994	0.00105425	0.00136951	0.00840958	0.00964489	0.00190492	0.00325795	0.00417709	0.000937811	0.00247001	0.0024332	0.00326836	0.00757199	0.0010769	0.00117144	0.00107908	0.00213269	0.00189395	0.00166353	0.0103836	0.00116894	0.00137057	0.00292952
0.792483	0.00136989	0.00290519	0.00128916	0.00475047	0.00229496	0.00279735	0.00230611	0.000963398	9.04955e-05	0.019058	0.00702375	0.00280047	0.000718207	0.00511478	0.00578419	0.00567145	1.24616e-05	0.0130392	0.00313198	0.00270351	0.00193007	0.00176478	0.0398759	0.00229298	0.00143717	0.000843806	0.000999404	0.00119968	0.00150507	0.0109703	0.00981657	0.00188991	0.0033436	0.00418508	0.00108325	0.00290854	0.00287836	0.00338286	0.00861185	0.00114674	0.0011302	0.00113821	0.00166996	0.00205658	0.0015783	0.0104178	0.00132926	0.0015224	0.0032317
0.869749	0.00130254	0.00315702	0.00134761	0.00599745	0.00250764	0.0029369	0.00238633	0.000806301	8.16822e-05	0.0199595	0.00724766	0.0029223	0.000759183	0.00496764	0.00604858	0.00624781	2.08895e-05	0.0113823	0.00364621	0.00240429	0.00211677	0.00176384	0.0346816	0.00239177	0.00152402	0.000763924	0.00106587	0.00141873	0.00166308	0.014506	0.00984277	0.00188615	0.00343344	0.00418311	0.00127316	0.00347683	0.00338646	0.00351403	0.00989741	0.00122765	0.00114305	0.00120345	0.00129052	0.00227839	0.00155195	0.01042	0.00151835	0.00169393	0.00355013
0.954548	0.00127324	0.00341865	0.00144983	0.00778412	0.00277686	0.00316516	0.00246681	0.000667842	7.46642e-05	0.0205439	0.00763335	0.00307675	0.000820636	0.00474119	0.00632083	0.0071457	3.49933e-05	0.00985418	0.00421004	0.00212415	0.00230695	0.00178384	0.0306406	0.00249566	0.00164487	0.000691521	0.00113938	0.00173207	0.00184462	0.0190957	0.00974274	0.00189386	0.00353299	0.00417069	0.00151723	0.00422149	0.00395682	0.00366871	0.01142	0.00132109	0.00121463	0.00127564	0.000984781	0.00258831	0.00159481	0.0103791	0.00174059	0.00188358	0.00388246
1.04762	0.00127655	0.00367948	0.00159567	0.0101793	0.00311837	0.00352465	0.00254762	0.000549577	6.88237e-05	0.0207138	0.00819596	0.00326641	0.000907555	0.00446664	0.00660061	0.00822222	5.8456e-05	0.00847279	0.00481545	0.00192107	0.00249913	0.0018258	0.0275961	0.00260523	0.0018077	0.000626275	0.00122104	0.00215361	0.00205063	0.0244308	0.00952152	0.00191351	0.0036503	0.00414802	0.00182409	0.00519633	0.00458592	0.00385645	0.0131482	0.00142889	0.00136163	0.00135592	0.000742452	0.00302501	0.00171822	0.010286	0.0020003	0.00209119	0.00422629
1.14976	0.00130541	0.00392995	0.00178828	0.0131797	0.00355009	0.00406289	0.0026284	0.00045196	6.37543e-05	0.0204205	0.00890298	0.0034929	0.00102538	0.00417729	0.00688872	0.00931415	9.71209e-05	0.00724519	0.00545146	0.00179386	0.00269279	0.00189095	0.0251283	0.00272178	0.00202192	0.000567721	0.00131204	0.00267793	0.00228257	0.0297045	0.00916921	0.00194595	0.00379584	0.00411621	0.00219879	0.00645328	0.00526734	0.00409044	0.0150274	0.00155322	0.00161368	0.00144581	0.000553345	0.00363613	0.00193771	0.0101342	0.00230151	0.00232033	0.00457928
1.26186	0.0013479	0.00416785	0.00203222	0.0166834	0.00409034	0.0048215	0.00270866	0.000374424	5.92039e-05	0.0196809	0.00970529	0.00375679	0.00117982	0.0039034	0.00718723	0.0102508	0.000159969	0.00616999	0.00610466	0.00172627	0.00288872	0.00198285	0.0229583	0.00284756	0.0022977	0.000515293	0.00141363	0.00326566	0.0025435	0.033849	0.00867253	0.00199247	0.00398209	0.00407736	0.00263963	0.00802663	0.00599184	0.00438844	0.0169836	0.00169671	0.00199912	0.00154736	0.000407912	0.00447401	0.00227422	0.00991977	0.00264776	0.00258036	0.0049394
1.38489	0.00138804	0.00440468	0.00233131	0.0204793	0.00475317	0.00581562	0.00278844	0.000315628	5.50247e-05	0.0185748	0.0105589	0.00405743	0.00137667	0.00366934	0.00749934	0.0108843	0.00026026	0.00523988	0.0067599	0.00170739	0.00308926	0.00211108	0.0209903	0.00298584	0.00264481	0.000468379	0.00152711	0.0038342	0.00283928	0.0358441	0.00803464	0.00205471	0.00422247	0.00403473	0.00313509	0.00991349	0.00674785	0.00477344	0.018929	0.00186262	0.0024726	0.0016633	0.000297592	0.0055878	0.00275302	0.00964207	0.00304201	0.00288631	0.00530515
1.51991	0.00141187	0.00466609	0.00268646	0.0242639	0.00553883	0.00700706	0.00286895	0.000273752	5.11334e-05	0.0172258	0.0114202	0.00439298	0.00162158	0.00349297	0.00782918	0.0111292	0.000416666	0.00444373	0.00740122	0.00173337	0.00329844	0.00229749	0.0192433	0.00314112	0.00307071	0.000426359	0.00165387	0.00426912	0.00317972	0.0348208	0.00729211	0.00213475	0.0045297	0.00399292	0.00366216	0.0120558	0.00752217	0.00527342	0.0207705	0.00205517	0.00281713	0.00179732	0.00021498	0.00701388	0.00340039	0.00930327	0.00348663	0.00325507	0.00567596
1.6681	0.00141367	0.00498141	0.0030941	0.0276839	0.00642052	0.0082835	0.00295318	0.000246767	4.74846e-05	0.0157712	0.012218	0.00476051	0.00191978	0.00338658	0.00818137	0.0109922	0.000654083	0.00376845	0.00801277	0.00180387	0.00352192	0.00258443	0.0177568	0.00331931	0.00357876	0.000388641	0.00179545	0.00447233	0.00358024	0.0306666	0.00651551	0.00223522	0.00491379	0.0039579	0.00418717	0.0143318	0.00830084	0.00591942	0.0224179	0.00227991	0.00281036	0.00195439	0.00015386	0.00876766	0.00423756	0.00890833	0.00398368	0.00369795	0.00605273
1.83074	0.00140363	0.00536459	0.00354568	0.0304016	0.00733703	0.00946315	0.00304635	0.000232628	4.40536e-05	0.0143352	0.0128343	0.00515644	0.00227584	0.00335871	0.00856047	0.0105715	0.00100375	0.00320038	0.00857975	0.0019166	0.00376679	0.00304162	0.0165266	0.00352796	0.00416691	0.000354686	0.00195376	0.00442903	0.00406567	0.0247788	0.00579016	0.00235948	0.00537995	0.00393708	0.00467011	0.0165647	0.00907028	0.00674154	0.0237925	0.00254411	0.00254259	0.00214126	0.000109151	0.0108399	0.00527059	0.00846451	0.00453551	0.00421133	0.00643863
2.00923	0.00137524	0.005798	0.00402923	0.032164	0.00820718	0.0103416	0.00315633	0.000229394	4.08261e-05	0.013012	0.0131265	0.00557733	0.00269341	0.00341597	0.00897057	0.0100231	0.00150228	0.00272631	0.00908932	0.00206083	0.00404113	0.00376471	0.0154931	0.00377627	0.00482789	0.000324018	0.00213151	0.00422847	0.00467895	0.019141	0.00519004	0.00251206	0.00592704	0.00393932	0.00507227	0.0185515	0.00981841	0.00776294	0.0248334	0.0028571	0.002271	0.00236709	7.67929e-05	0.013197	0.00647377	0.00798082	0.00514552	0.00476945	0.00684001
2.20513	0.00134613	0.00623113	0.00453345	0.0328539	0.00896194	0.0107766	0.00329397	0.000235262	3.77927e-05	0.0118613	0.0129951	0.00602133	0.00317507	0.00356441	0.00941503	0.00951319	0.00218946	0.00233413	0.00953152	0.00221206	0.00435348	0.00485903	0.0145663	0.00407494	0.00555102	0.000296229	0.00233299	0.00401061	0.00549705	0.0147795	0.00476149	0.00269904	0.00654677	0.00397479	0.00536558	0.0201091	0.0105359	0.00899266	0.0255015	0.00323053	0.00208479	0.00264402	5.36055e-05	0.0157788	0.00776739	0.00746735	0.00581936	0.0053244	0.00726747
2.42013	0.00132903	0.00660114	0.00505458	0.032507	0.00956181	0.0107685	0.00347333	0.000248569	3.49462e-05	0.0109129	0.0124606	0.00649064	0.00372229	0.00381013	0.00989688	0.00917913	0.00310467	0.00201335	0.0099002	0.00233371	0.00471214	0.00640394	0.0136645	0.00443571	0.00632588	0.000270977	0.00256529	0.00390146	0.00665327	0.0117723	0.00452225	0.0029286	0.00722424	0.00405484	0.00554032	0.0211227	0.011217	0.010419	0.0257814	0.0036787	0.00197874	0.00298748	3.71443e-05	0.0184851	0.0090067	0.00693466	0.00656594	0.00581811	0.00773647
2.65609	0.00133553	0.00686845	0.00560502	0.0312886	0.00998932	0.0104694	0.00371175	0.000267761	3.228e-05	0.010176	0.0116905	0.00699511	0.00433587	0.00415874	0.0104197	0.00911015	0.00428248	0.00175516	0.0101944	0.0023908	0.00512446	0.00839441	0.0127464	0.00487067	0.00714677	0.000247987	0.00283993	0.00399117	0.00836223	0.00986916	0.00447056	0.00321148	0.00793982	0.00419205	0.00560827	0.0215783	0.0118609	0.012005	0.0256799	0.00421918	0.00192552	0.00341606	2.55599e-05	0.0211585	0.0100197	0.00639314	0.00739832	0.00620553	0.00826734
2.91505	0.00137531	0.0070424	0.00622194	0.0294455	0.0102434	0.0101074	0.00402945	0.000291367	2.97871e-05	0.00964931	0.0109406	0.0075567	0.00501697	0.00461391	0.0109893	0.00934531	0.00574783	0.00155249	0.0104199	0.00237757	0.00559633	0.0106644	0.0118226	0.00539193	0.00801705	0.00022705	0.00317473	0.00434282	0.0109453	0.00880168	0.00459681	0.00356132	0.00867232	0.00440031	0.00559972	0.0215631	0.0124725	0.0136884	0.0252234	0.00487401	0.00191931	0.00395041	1.74739e-05	0.0235953	0.0106969	0.00585255	0.00833373	0.0064776	0.00888421
3.19927	0.00145719	0.00717247	0.0069738	0.0272495	0.0103528	0.00989804	0.00444911	0.000317983	2.74607e-05	0.00932939	0.0104535	0.00821379	0.00576909	0.00517511	0.0116149	0.00988032	0.00751166	0.0013998	0.0105922	0.00229576	0.00613179	0.0128394	0.0109437	0.00601201	0.00895224	0.000208026	0.00359518	0.00500208	0.0148555	0.00835602	0.00489259	0.00399486	0.00940306	0.00469533	0.00555617	0.0212367	0.0130628	0.0153862	0.0244537	0.00567198	0.00196586	0.00461158	1.1873e-05	0.0256014	0.0110559	0.00532163	0.00939277	0.00666819	0.00961278
3.51119	0.00159083	0.00731588	0.00796407	0.0249509	0.0103921	0.0100115	0.00499542	0.000346272	2.52934e-05	0.00921507	0.0103917	0.00902334	0.00660099	0.00583537	0.0123102	0.0106778	0.00956767	0.00129283	0.0107385	0.00218954	0.00673336	0.014432	0.0101751	0.00674533	0.00998206	0.000190856	0.00413485	0.00599169	0.0206852	0.0083696	0.0053554	0.00453194	0.0101201	0.00509528	0.00552149	0.0207867	0.0136496	0.0170036	0.0234238	0.00665232	0.00207223	0.00541877	8.02102e-06	0.0270626	0.0112306	0.00480782	0.0105975	0.00684097	0.010477
3.85353	0.00178706	0.00751376	0.00933164	0.0227505	0.0104782	0.0105932	0.00569536	0.000374977	2.32777e-05	0.00930885	0.0108239	0.0100584	0.00753013	0.00657937	0.013093	0.0116783	0.0118908	0.00122831	0.0109012	0.00209574	0.00740314	0.0151285	0.00957191	0.00761064	0.0111524	0.00017558	0.00483432	0.00728704	0.0290523	0.0087155	0.0059891	0.00519546	0.0108216	0.00562131	0.00553458	0.0203866	0.0142574	0.0184472	0.0221934	0.00787009	0.00224284	0.0063874	5.38965e-06	0.027986	0.0114172	0.00431717	0.0119687	0.00706841	0.0114956
4.22924	0.00204965	0.00779087	0.0112465	0.0207882	0.0107432	0.0117967	0.0065798	0.000402946	2.14059e-05	0.00961455	0.0117399	0.0113994	0.00858555	0.00738283	0.0139829	0.0128122	0.0144376	0.00120368	0.0111387	0.00203979	0.00814513	0.0150205	0.00916586	0.00863383	0.0125286	0.000162351	0.00573917	0.00878279	0.0400219	0.00929142	0.00680138	0.00601187	0.0115177	0.00629773	0.00562456	0.0201689	0.0149165	0.0196378	0.020825	0.00940336	0.00246602	0.00752803	3.6033e-06	0.0284965	0.0118215	0.00385426	0.013524	0.00741742	0.0126785
4.64159	0.00239094	0.00817005	0.0138933	0.0191455	0.0113038	0.0137961	0.00768731	0.00042916	1.96704e-05	0.0101328	0.0130681	0.0131194	0.00980881	0.00821342	0.0149979	0.014011	0.0171487	0.00121681	0.0115239	0.00203624	0.00896887	0.0144956	0.00896215	0.00985061	0.0142017	0.000151451	0.00689793	0.0102851	0.0515066	0.0100162	0.00780033	0.00701314	0.0122298	0.00715139	0.00580857	0.0202146	0.0156605	0.0205231	0.0193813	0.0113625	0.00272882	0.00884709	2.39768e-06	0.0287822	0.0126201	0.00342232	0.0152754	0.00794606	0.0140244
5.09414	0.00280618	0.00868782	0.0174294	0.0178547	0.0122412	0.0167566	0.00907144	0.000452759	1.80634e-05	0.0108555	0.014695	0.0152651	0.0112514	0.00903337	0.0161503	0.0152186	0.0199527	0.00126577	0.0121387	0.00209349	0.0098941	0.013953	0.00894411	0.0113089	0.0162941	0.000143287	0.00836157	0.0115743	0.058491	0.0108322	0.00899184	0.00824179	0.0129877	0.00821049	0.00609149	0.0205547	0.0165237	0.0210848	0.0179225	0.013902	0.0029757	0.0103499	1.58843e-06	0.0290007	0.0139348	0.0030233	0.0172306	0.00870832	0.0155199
5.59081	0.00328159	0.00940367	0.0218929	0.0169113	0.0135916	0.0207411	0.0108133	0.000473058	1.65773e-05	0.0117611	0.0164911	0.0178391	0.0129678	0.00980343	0.0174434	0.0163988	0.0227708	0.00134865	0.0130644	0.00221773	0.010955	0.013656	0.00907991	0.0130705	0.0189653	0.000138371	0.0101858	0.0125262	0.0581307	0.0117092	0.0103793	0.00976148	0.0138249	0.0095031	0.00646686	0.0211792	0.0175354	0.0213419	0.0165046	0.0172362	0.0032197	0.0120462	1.048e-06	0.029208	0.0158111	0.00265806	0.0193948	0.00976287	0.0171399
6.13591	0.00379648	0.0104051	0.0270717	0.0162854	0.015346	0.0255352	0.0130409	0.000489561	1.52046e-05	0.012812	0.0183416	0.0207874	0.0150054	0.0104875	0.0188716	0.0175385	0.0255227	0.00146333	0.0143689	0.00241584	0.0122021	0.0137454	0.00932923	0.0152124	0.0224098	0.000137275	0.0124379	0.0131904	0.0534102	0.0126456	0.0119661	0.0116759	0.0147731	0.0110556	0.00691874	0.0220481	0.0187156	0.0213468	0.0151775	0.0216513	0.00342573	0.0139571	6.88796e-07	0.0293624	0.0181936	0.00232653	0.0217763	0.0111838	0.0188498
6.73415	0.00441174	0.0118167	0.0324462	0.0159323	0.0174701	0.0304623	0.0159563	0.000501956	1.39381e-05	0.0139537	0.0201696	0.0239965	0.0173917	0.0110566	0.0204222	0.0186451	0.0281315	0.00160731	0.0160931	0.00269977	0.0136987	0.0143064	0.00964992	0.0178248	0.0268385	0.000140561	0.015209	0.0137509	0.0485215	0.0136631	0.0137578	0.01416	0.0158567	0.0128908	0.0074242	0.0231016	0.0200701	0.0211779	0.0139835	0.0274815	0.00363819	0.0161239	4.51099e-07	0.0293981	0.0209264	0.00202788	0.0243895	0.0130736	0.0206078
7.39072	0.0051856	0.0138216	0.0374227	0.0157992	0.0199558	0.034481	0.0198695	0.000510104	1.27707e-05	0.0151188	0.0219479	0.0273018	0.0201223	0.0114921	0.0220808	0.0197398	0.0305277	0.00177754	0.0182395	0.00307038	0.015512	0.0154282	0.0100068	0.0210058	0.0324176	0.000148702	0.0186306	0.0144238	0.0452866	0.0147978	0.0157634	0.0175083	0.0170875	0.0150243	0.00795598	0.0242692	0.021586	0.020929	0.0129563	0.0349313	0.00394407	0.0186142	2.94452e-07	0.0293099	0.0238346	0.00176074	0.0272555	0.0155792	0.0223686
8.11131	0.00629832	0.0167027	0.0417826	0.0158319	0.0228935	0.0368053	0.0252365	0.000514024	1.16957e-05	0.0162322	0.0237028	0.0305061	0.0231521	0.0117859	0.0238324	0.0208483	0.0326534	0.0019703	0.020765	0.00362428	0.0176972	0.0172461	0.010385	0.024846	0.0391121	0.000162001	0.022891	0.0153858	0.0436307	0.0160872	0.0179881	0.0222047	0.0184603	0.0174579	0.00848489	0.0254759	0.0232313	0.0206968	0.0121189	0.0437648	0.00446962	0.0215266	1.91611e-07	0.0291847	0.0268854	0.00152329	0.0303928	0.0189082	0.0240863
8.90215	0.00812134	0.020883	0.0457296	0.0159778	0.0265215	0.0374903	0.0326685	0.00051387	1.07067e-05	0.0172192	0.0255139	0.0334053	0.0263911	0.0119402	0.0256589	0.02199	0.0344639	0.00218108	0.0235813	0.00451742	0.0202791	0.0199759	0.010807	0.0293991	0.046454	0.000180519	0.0282396	0.0167542	0.0426818	0.0175579	0.020418	0.0289588	0.0199484	0.0201702	0.00898153	0.0266472	0.0249551	0.0205694	0.0114838	0.053116	0.00542863	0.0249893	1.24333e-07	0.0291641	0.030306	0.00131348	0.0337952	0.0233242	0.025717
9.7701	0.0114312	0.0270616	0.0494454	0.0161888	0.0312353	0.037218	0.0427353	0.000509902	9.79743e-06	0.0180139	0.0275009	0.0358158	0.0297083	0.0119648	0.0275274	0.0231694	0.035929	0.00240465	0.026561	0.00605959	0.023236	0.0239478	0.0113448	0.0346284	0.0534952	0.00020403	0.0349547	0.0185822	0.0414333	0.0192114	0.0229966	0.0385398	0.0215012	0.0231047	0.00941722	0.0277128	0.0266917	0.020616	0.0110524	0.0612344	0.00731292	0.0291492	8.04646e-08	0.0293698	0.0345178	0.00112907	0.0373996	0.0290449	0.0272212
10.7227	0.0175959	0.0362389	0.0526259	0.0164228	0.0375222	0.0366654	0.0551636	0.000502459	8.96217e-06	0.0185659	0.0297876	0.0375972	0.0329414	0.0118743	0.0293745	0.024369	0.0370328	0.00263511	0.0295505	0.00931924	0.0264893	0.0296417	0.0121118	0.0403259	0.058938	0.000232013	0.0432255	0.0208335	0.039254	0.021009	0.0256009	0.0513084	0.0230426	0.0261604	0.00976477	0.0286096	0.0283663	0.0208801	0.0108153	0.0646714	0.0115076	0.0341434	5.1947e-08	0.029841	0.0398964	0.000967776	0.041048	0.0360825	0.0285646
11.7681	0.0274451	0.0517683	0.0543065	0.0166441	0.045715	0.0361668	0.0678055	0.000491936	8.1954e-06	0.0188456	0.0324346	0.038668	0.0359153	0.0116855	0.0310943	0.0255461	0.0377726	0.00286617	0.0323857	0.018074	0.0299039	0.0376789	0.0132224	0.0460177	0.0615282	0.000263667	0.0528645	0.0233229	0.0361555	0.022855	0.0280315	0.0660418	0.0244746	0.0291887	0.00999972	0.0292843	0.0299018	0.0213746	0.010754	0.0644807	0.0214223	0.0400358	3.34606e-08	0.0305033	0.0463918	0.00082734	0.0444619	0.0440493	0.0297198
12.9155	0.0369839	0.0775046	0.0532692	0.0168241	0.0547555	0.0357205	0.0764886	0.000478758	7.49195e-06	0.0188456	0.0353421	0.0390092	0.0384625	0.0114152	0.0325389	0.0266339	0.0381574	0.00309134	0.0349096	0.0415825	0.0332991	0.0485503	0.0147228	0.0509251	0.0606571	0.000297968	0.0628119	0.0256693	0.032594	0.0245835	0.0300342	0.0798062	0.0256854	0.0320024	0.0101025	0.0296962	0.0312263	0.0220825	0.0108424	0.060025	0.0400844	0.0466958	2.1508e-08	0.0311755	0.0520746	0.000705562	0.0472538	0.051513	0.0306657
14.1747	0.036662	0.11022	0.0490108	0.0169412	0.0638176	0.0351227	0.0773067	0.000463361	6.84696e-06	0.0185787	0.0381424	0.0386596	0.0404449	0.0110791	0.0335385	0.027548	0.0382062	0.00330431	0.0369877	0.0818454	0.0364711	0.0615244	0.0165108	0.054099	0.0566818	0.000333736	0.0708059	0.0273317	0.0290594	0.0259621	0.0313596	0.0834695	0.0265642	0.0343979	0.0100615	0.0298193	0.0322796	0.0229589	0.0110494	0.0521918	0.0565106	0.0536153	1.37984e-08	0.031612	0.0562454	0.00060036	0.0490009	0.0560899	0.0313885
15.5568	0.0250987	0.122232	0.0423436	0.0169803	0.0671239	0.0341137	0.0703777	0.000446176	6.25589e-06	0.0180739	0.0401675	0.0377023	0.0417704	0.0106911	0.0339394	0.0281987	0.0379449	0.00349924	0.0385189	0.100345	0.0392186	0.0733231	0.0182839	0.0547863	0.0506614	0.000369721	0.0741734	0.0277726	0.025842	0.0267322	0.0318434	0.0745914	0.0270204	0.0361873	0.00987505	0.0296436	0.0330174	0.0239372	0.0113406	0.0437351	0.0485973	0.0597524	8.83659e-09	0.0315736	0.0551329	0.000509788	0.0493723	0.0565069	0.031881
17.0735	0.0133535	0.0953052	0.0348354	0.0169321	0.0616863	0.032508	0.0594461	0.000427611	5.7145e-06	0.0173712	0.0406389	0.0362491	0.0424017	0.0102633	0.0336475	0.0285059	0.0374052	0.00367106	0.0394426	0.0659799	0.0413709	0.0785145	0.0195786	0.05283	0.0437945	0.000404691	0.0717389	0.0267391	0.0230302	0.0266871	0.0314645	0.059781	0.0270012	0.0372325	0.00955322	0.0291748	0.0334143	0.0249373	0.0116816	0.0358847	0.0252295	0.0636643	5.64977e-09	0.0309064	0.0496392	0.000432057	0.0482568	0.0521312	0.0321424
18.7382	0.00713018	0.0610447	0.0278421	0.0167929	0.0505941	0.030277	0.0481895	0.00040805	5.21882e-06	0.0165157	0.0390955	0.0344234	0.0423553	0.00980595	0.0326573	0.0284154	0.0366217	0.00381566	0.0397399	0.0254925	0.0428087	0.0737785	0.0199461	0.0487558	0.0370142	0.000437502	0.0647633	0.0244313	0.0205965	0.0257591	0.0303443	0.0468737	0.0265031	0.0374708	0.00911601	0.0284334	0.0334645	0.0258747	0.0120392	0.0291651	0.0106351	0.0641333	3.6068e-09	0.0295889	0.0409322	0.000365538	0.0458099	0.0451275	0.0321774
20.5651	0.00431863	0.0385831	0.0220645	0.0165635	0.0398102	0.0275526	0.0384893	0.000387839	4.7652e-06	0.0155528	0.0357392	0.0323472	0.0416932	0.009328	0.0310546	0.0279091	0.0356306	0.00393006	0.0394298	0.00935309	0.0434762	0.0618917	0.0191929	0.0434603	0.0309102	0.00046716	0.0557694	0.0213756	0.0184728	0.0240573	0.0286909	0.0357633	0.0255708	0.0369235	0.00859051	0.0274512	0.0331792	0.0266693	0.0123839	0.0237119	0.00535475	0.0609373	2.29938e-09	0.027726	0.0323975	0.000308764	0.0423883	0.0369432	0.0319963
22.5702	0.00288477	0.0262745	0.0175435	0.016248	0.0301642	0.0245605	0.0308612	0.000367287	4.35022e-06	0.0145248	0.0313177	0.0301308	0.0405083	0.00883724	0.0289918	0.0270085	0.034468	0.00401248	0.038563	0.00480252	0.0433818	0.0483448	0.0174881	0.0378001	0.0257226	0.00049287	0.046824	0.0181507	0.0165918	0.0218232	0.0267282	0.0274428	0.0242856	0.0356858	0.0080067	0.0262686	0.0325846	0.0272538	0.0126903	0.0194065	0.00326113	0.0550119	1.46402e-09	0.0254969	0.0252585	0.000260423	0.0384205	0.0295609	0.0316133
24.7708	0.00208073	0.0184093	0.0140616	0.0158537	0.0228225	0.021533	0.0250358	0.000346663	3.97071e-06	0.0134682	0.0266592	0.0278669	0.0389096	0.00834049	0.0266491	0.0257692	0.0331689	0.00406228	0.0372132	0.00301745	0.0425889	0.0367257	0.0152392	0.0323661	0.0214287	0.000514048	0.038933	0.0151697	0.014903	0.0193379	0.0246444	0.0214024	0.022748	0.0339026	0.00739356	0.0249303	0.0317176	0.0275791	0.0129387	0.016015	0.00224172	0.0478221	9.31056e-10	0.0230939	0.0197431	0.000219354	0.0342912	0.0234829	0.0310462
27.1859	0.00153803	0.013426	0.0113791	0.0153896	0.0175028	0.0186502	0.0205749	0.000326197	3.62376e-06	0.0124131	0.022326	0.0256286	0.0370085	0.00784375	0.0241979	0.0242692	0.031766	0.00407988	0.0354682	0.00209583	0.0412013	0.0279386	0.0128692	0.0274683	0.0179072	0.000530337	0.0323449	0.0126063	0.0133734	0.0168401	0.0225714	0.0170468	0.0210597	0.0317396	0.00677619	0.0234819	0.0306216	0.0276172	0.0131145	0.0133244	0.00160717	0.0406019	5.91477e-10	0.0206783	0.0156536	0.000184532	0.0302817	0.0187491	0.0303155
29.8365	0.00117063	0.0101972	0.00929884	0.014866	0.0137138	0.0160223	0.0171135	0.00030608	3.30667e-06	0.011383	0.0185682	0.0234695	0.0349092	0.00735224	0.0217772	0.0225953	0.0302893	0.00406664	0.0334214	0.00150615	0.0393448	0.0215052	0.0106742	0.0232164	0.0150227	0.000541586	0.0269656	0.0104782	0.0119833	0.0144898	0.0205883	0.013836	0.0193111	0.0293581	0.00617426	0.0219667	0.0293431	0.0273617	0.0132086	0.0111697	0.00119729	0.0340487	3.75381e-10	0.0183635	0.0126149	0.000155061	0.0265634	0.0151491	0.0294431
32.7455	0.000917661	0.00799645	0.0076712	0.0142937	0.0109624	0.0136986	0.0143851	0.000286467	3.01693e-06	0.0103948	0.0154305	0.0214261	0.0327017	0.00687047	0.0194848	0.0208312	0.0287658	0.00402469	0.0311648	0.00112253	0.0371517	0.0167844	0.00879952	0.0196055	0.0126545	0.000547836	0.0225998	0.0087375	0.0107207	0.0123723	0.0187343	0.0114051	0.0175739	0.0268972	0.00560174	0.0204238	0.0279283	0.0268251	0.0132167	0.00942774	0.000925889	0.0284176	2.38021e-10	0.0162169	0.0103151	0.000130161	0.0232188	0.0123974	0.0284517
35.9381	0.000737848	0.00642018	0.00638547	0.0136837	0.00891027	0.011686	0.0122013	0.000267483	2.75227e-06	0.00946011	0.0128593	0.0195199	0.0304599	0.00640218	0.0173791	0.0190489	0.0272193	0.0039567	0.028784	0.00086638	0.0347473	0.0132773	0.00727851	0.016577	0.0107029	0.000549284	0.01905	0.00731975	0.00957749	0.0105177	0.0170226	0.00952064	0.0159001	0.0244655	0.0050674	0.0188867	0.0264207	0.0260353	0.0131388	0.00800734	0.000740778	0.0237147	1.50799e-10	0.0142702	0.00853906	0.000109155	0.0202699	0.0102641	0.0273642
39.4421	0.000605207	0.00524655	0.00536005	0.0130464	0.00734161	0.00996653	0.0104283	0.000249221	2.51055e-06	0.00858604	0.0107684	0.0177613	0.0282409	0.00595043	0.0154864	0.0173055	0.0256701	0.00386575	0.0263544	0.000687416	0.0322416	0.0106345	0.00608211	0.0140532	0.00908832	0.000546256	0.0161483	0.00616378	0.00854629	0.00892277	0.0154522	0.00803053	0.0143235	0.0221398	0.00457569	0.0173826	0.0248597	0.0250308	0.0129783	0.00684005	0.000609392	0.0198405	9.54666e-11	0.0125313	0.007142	9.14594e-05	0.0177029	0.00858505	0.0262025
43.2876	0.000504264	0.00434637	0.00453451	0.0123917	0.00611721	0.00851023	0.00897044	0.000231752	2.28984e-06	0.00777607	0.00906997	0.0161521	0.0260864	0.00551759	0.01381	0.0156417	0.0241355	0.00375512	0.0239395	0.000557024	0.0297246	0.00861502	0.00515508	0.0119555	0.00774745	0.000539168	0.0137608	0.00521777	0.00761986	0.00756671	0.0140152	0.0068329	0.0128634	0.0199686	0.0041279	0.0159326	0.0232791	0.0238555	0.0127413	0.00587395	0.000512795	0.0166657	6.03955e-11	0.0109935	0.00602569	7.65712e-05	0.0154852	0.0072446	0.0249875
47.5081	0.000425498	0.00363991	0.00386382	0.0117286	0.00514464	0.00728296	0.00775837	0.000215122	2.08835e-06	0.00703096	0.00768663	0.0146881	0.0240253	0.0051054	0.0123388	0.0140838	0.0226296	0.00362818	0.0215903	0.000458848	0.0272652	0.00705151	0.00443783	0.0102121	0.00662987	0.000528496	0.0117828	0.00443978	0.00679053	0.00642175	0.0127017	0.00585714	0.0115279	0.0179769	0.00372305	0.0145521	0.0217073	0.0225552	0.0124358	0.00506917	0.000439493	0.0140654	3.8184e-11	0.00964266	0.0051218	6.40597e-05	0.0135767	0.00616094	0.0237383
52.1401	0.000362779	0.00307541	0.00331413	0.0110649	0.00436072	0.0062511	0.00674086	0.000199359	1.90443e-06	0.00634953	0.00655432	0.0133615	0.0220756	0.004715	0.0110538	0.0126465	0.021164	0.00348821	0.0193456	0.00038301	0.0249128	0.00582633	0.00387721	0.00876088	0.00569526	0.000514749	0.0101335	0.00379651	0.00605033	0.00545873	0.0115014	0.00505295	0.0103175	0.016173	0.00335879	0.0132515	0.0201672	0.0211735	0.012071	0.00439471	0.000382104	0.0119307	2.41272e-11	0.00846107	0.00438167	5.35567e-05	0.0119364	0.00527509	0.0224724
57.2237	0.000311996	0.00261778	0.00285978	0.0104076	0.00372105	0.00538378	0.00587962	0.000184476	1.73658e-06	0.00572923	0.00562171	0.012162	0.0202475	0.00434705	0.0099327	0.0113352	0.0197476	0.00333834	0.0172328	0.000323214	0.0226994	0.00485535	0.00343049	0.00754963	0.00491118	0.000498442	0.00875002	0.00326167	0.00539122	0.00465014	0.010405	0.00438355	0.00922789	0.0145533	0.00303198	0.0120369	0.0186764	0.0197501	0.0116565	0.00382629	0.000335694	0.0101714	1.5237e-11	0.00743027	0.00376983	4.47483e-05	0.0105259	0.00454381	0.0212049
62.8029	0.000270295	0.00224239	0.00248122	0.00976239	0.00319364	0.00465385	0.00514555	0.000170472	1.58342e-06	0.00516663	0.00484835	0.0110787	0.0185449	0.00400176	0.00895292	0.0101491	0.0183873	0.0031815	0.0152699	0.000275266	0.020643	0.00407764	0.00306565	0.00653506	0.00425131	0.000480079	0.0075832	0.00281456	0.00480532	0.00397143	0.00940453	0.00382153	0.00825158	0.013107	0.00273915	0.0109109	0.0172478	0.0183191	0.0112021	0.00334466	0.000296919	0.0087144	9.61798e-12	0.00653238	0.00325987	3.73678e-05	0.00931058	0.00393484	0.019949
68.9261	0.000235635	0.00193139	0.00216338	0.00913404	0.00275491	0.00403807	0.0045162	0.000157335	1.44368e-06	0.00465782	0.00420257	0.0101002	0.0169673	0.00367896	0.00809351	0.00908282	0.0170877	0.00302032	0.0134666	0.000236268	0.0187508	0.00344849	0.00275985	0.00568172	0.00369422	0.000460136	0.00659421	0.00243881	0.0042851	0.00340128	0.0084926	0.00334606	0.00737966	0.0118194	0.00247682	0.00987347	0.0158905	0.0169086	0.0107175	0.0029345	0.000263539	0.00750146	6.06839e-12	0.0057508	0.00283174	3.11887e-05	0.00826051	0.00342377	0.0187158
75.6463	0.000206525	0.00167158	0.00189461	0.00852633	0.00238719	0.0035169	0.00397395	0.000145045	1.31619e-06	0.00419864	0.00365964	0.00921588	0.0155114	0.00337823	0.00733596	0.00812872	0.0158523	0.00285713	0.011826	0.000204162	0.0170222	0.00293473	0.00249739	0.00496074	0.00322235	0.000439055	0.00575214	0.00212142	0.00382352	0.00292163	0.00766271	0.00294107	0.00660262	0.0106743	0.00224167	0.00892264	0.01461	0.0155405	0.0102116	0.0025835	0.000234113	0.00648611	3.82726e-12	0.00507054	0.00247001	2.60192e-05	0.00735008	0.00299184	0.0175144
83.0218	0.000181852	0.00145293	0.00166581	0.00794216	0.00207693	0.00307409	0.00350479	0.000133578	1.19991e-06	0.00378491	0.00320019	0.00841566	0.0141716	0.00309887	0.00666443	0.00727763	0.0146827	0.00269397	0.010346	0.000177449	0.0154512	0.0025115	0.00226773	0.00434869	0.00282128	0.000417232	0.00503214	0.00185202	0.0034141	0.00251726	0.00690881	0.00259401	0.005911	0.00965527	0.00203065	0.00805491	0.0134093	0.0142312	0.0096925	0.00228174	0.000207764	0.00563147	2.41291e-12	0.0044782	0.00216261	2.16973e-05	0.00655772	0.00262448	0.0163521
91.1163	0.000160771	0.00126774	0.00146982	0.00738364	0.00181363	0.00269625	0.00309743	0.000122901	1.09384e-06	0.00341255	0.00280901	0.00769043	0.0129417	0.00284004	0.00606577	0.00651995	0.0135796	0.00253256	0.00902085	0.000155016	0.0140283	0.00216001	0.0020638	0.00382656	0.00247913	0.000395019	0.00441411	0.0016223	0.00305093	0.00217553	0.0062252	0.00229496	0.00529579	0.00874707	0.00184101	0.00726587	0.0122891	0.0129918	0.00916755	0.00202116	0.000183997	0.0049082	1.52072e-12	0.00396201	0.00190002	1.80862e-05	0.00586539	0.00231025	0.0152344
100	0.00014263	0.00111	0.00130098	0.00685221	0.00158902	0.00237242	0.00274263	0.00011298	9.97107e-07	0.00307767	0.00247407	0.00703205	0.0118144	0.00260078	0.00552916	0.00584615	0.0125427	0.00237431	0.00784218	0.000136025	0.0127424	0.00186592	0.00188086	0.00337893	0.0021861	0.000372718	0.00388169	0.00142555	0.00272871	0.00188593	0.00560646	0.00203601	0.00474857	0.00793574	0.00167031	0.00655047	0.0112484	0.0118296	0.0086431	0.00179517	0.000162542	0.00429293	9.58121e-13	0.00351168	0.00167462	1.50708e-05	0.00525805	0.00204004	0.0141654
[truncated: 306 more columns]
