# Supplementary material for: A high-throughput platform for single-molecule tracking identifies drug interaction and cellular mechanisms
Source: eLife. 2025 Jan 9;12:RP93183. doi: 10.7554/eLife.93183 (PMC11717362; doi:10.7554/eLife.93183)
Supplement: Figure 2—source data 1. [file elife-93183-fig2-data1.xlsx]

## Sheet: Figure 2B 
ER
Concentration	DHT			Dexamethasone			Progesterone			Estradiol
	Mean Fbound plate 1	Mean Fbound plate 2	Mean Fbound plate 3	Mean Fbound plate 1	Mean Fbound plate 2	Mean Fbound plate 3	Mean Fbound plate 1	Mean Fbound plate 2	Mean Fbound plate 3	Mean Fbound plate 1	Mean Fbound plate 2	Mean Fbound plate 3
8.6e-09	0.01271	0.01115	0.06453	-0.01777	-0.00723	0.02747	0.01671	-0.01006	0.04804	0.01875	0.0094	0.0264
2.58e-08	0.01774	0.01164	0.02899	0.00617	-0.00456	0.10125	0.01321	-0.00887	-0.00056	-0.00058	0.0126	0.01261
7.74e-08	0.03953	0.00374	0.00817	0.01298	0.01479	0.0221	0.01	-0.00781	0.01191	0.0305	-0.00775	0.05374
2.32e-07	-0.00116	-0.01029	0.02455	0.00867	-0.0119	0.03278	0.01451	-0.02586	0.03244	0.0547	0.05355	-0.0018
6.97e-07	0.02322	0.03339	0.03613	-0.01611	0.00181	0.03756	0.0111	-0.00091	0.0142	0.05185	0.06116	0.0592
2.09e-06	0.01301	0.00265	0.04099	0.02471	0.01533	0.03726	0.02843	0.00675	0.00951	0.1176	0.17563	0.18506
6.27e-06	0.01477	0.0006	0.04002	-0.0173	0.0262	0.02841	0.02706	-0.00725	0.01825	0.26728	0.23752	0.28771
1.88e-05	-0.00498	0.00621	-0.00484	0.01303	0.01115	-0.00355	0.02206	-0.01199	0.03684	0.41957	0.38586	0.39751
5.65e-05	0.01536	0.02209	0.02117	-0.00473	0.0059	0.00551	0.01473	0.02092	0.00128	0.44038	0.41028	0.45984
0.00016935	-0.00585	-0.00456	0.01678	0.01369	0.01519	0.08752	0.02598	0.00092	-0.00522	0.4538	0.43096	0.46061
0.00050805	0.01189	0.00514	0.02571	-0.00622	0.00063	0.03142	0.02161	0.02153	0.04315	0.47873	0.43099	0.4892
0.00152416	0.00231	-0.0159	0.04493	-0.01806	-0.01042	0.02012	0.0029	0.00177	0.04308	0.49598	0.42478	0.48755
0.00457247	0.00488	-0.01373	0.0066	0.01535	0.0171	-0.00566	0.00888	0.01614	0.07061	0.48634	0.44957	0.47957
0.0137174	0.01506	-0.01882	0.05072	0.0019	0.03525	0.04524	0.0143	-0.00486	0.01019	0.49786	0.4245	0.4842
0.0411523	-0.00165	0.00866	0.03635	0.01499	0.02406	-0.0089	0.02062	0.03813	0.0562	0.4908	0.44913	0.48186
0.123457	0.00336	0.02931	0.02763	-0.00186	0.01722	-0.00223	0.02037	0.05232	0.01593	0.48486	0.44513	0.48436
0.37037	0.02523	0.05107	0.07877	0.00611	0.02307	0.01494	0.10058	0.10027	0.12224	0.49938	0.43165	0.48334
1.11111	0.0707	0.115	0.15136	-0.00364	0.00692	0.02967	0.15433	0.18963	0.15965	0.47173	0.42632	0.48228
3.33333	0.35063	0.35075	0.39276	-0.01583	0.01219	0.01202	0.36186	0.39011	0.41875	0.49341	0.44126	0.49301
10	0.44312	0.4084	0.44147	0.00453	0.00121	0.01456	0.41216	0.40726	0.44992	0.47324	0.43949	0.47959
AR
Concentration	DHT			Dexamethasone			Progesterone			Estradiol
	Mean Fbound plate 1	Mean Fbound plate 2	Mean Fbound plate 3	Mean Fbound plate 1	Mean Fbound plate 2	Mean Fbound plate 3	Mean Fbound plate 1	Mean Fbound plate 2	Mean Fbound plate 3	Mean Fbound plate 1	Mean Fbound plate 2	Mean Fbound plate 3
8.6e-09	0.0116437	-0.0152272	-0.0064325	-0.0176819	-0.023219	-0.0201951	-0.0174545	-0.0133222	-0.0052119	-9.078e-05	-0.0281873	-0.0117809
2.58e-08	-0.002149	-0.0063125	0.0150337	0.0219823	-0.0246167	0.00341782	-0.0074507	-0.0052419	0.00513408	-0.0053184	-0.0098674	-0.0097512
7.74e-08	-0.0041591	-0.0231283	0.0188498	-0.0063279	-0.0228599	0.00231302	-0.0170426	-0.015724	-0.0305137	0.00053832	-0.000137	0.0191431
2.32e-07	-0.0025668	0.0148461	0.00536307	-0.0062329	-0.0323033	0.00741732	-0.0007449	-0.0148803	-0.0098089	-0.0126991	-0.0232409	-0.001915
6.97e-07	0.00290482	-0.0197201	0.00570283	-0.0061304	-0.0055718	0.00547506	-0.006269	-0.0114889	0.0120728	-0.0063565	-0.0066663	-0.0358239
2.09e-06	0.00959346	0.0226822	0.0383196	0.0279901	-0.0015881	-0.0054722	-0.0025497	-0.0384186	-0.0243447	-0.0031868	-0.0170435	-0.0074147
6.27e-06	0.0425114	0.0316294	0.0474233	-0.0282154	-0.017536	0.00288022	-0.033521	-0.001441	-0.0013235	-0.0058481	0.013611	0.00451219
1.88e-05	0.0861358	0.0730957	0.1103	-0.0060698	-0.0081029	-0.015712	-0.0217751	0.00538265	-0.0236826	-0.0024114	0.00295104	-0.002998
5.65e-05	0.165419	0.146985	0.139603	-0.0143607	-0.0314889	-0.0094395	-0.0067673	-0.0253435	-0.0217194	-0.0196564	0.0194441	-0.0143136
0.00016935	0.207778	0.196294	0.221458	0.0284244	-0.0132169	0.00270547	-0.0146302	-0.0226979	-0.0121539	-0.0251071	0.0128846	-0.0004733
0.00050805	0.256081	0.249536	0.240006	-0.0027723	-0.0187405	-0.0211365	-0.0240204	-0.0396949	-0.0170082	0.0357161	-0.029587	0.02791
0.00152416	0.26427	0.259289	0.256156	-0.0011967	-0.0209555	-0.0094551	-0.0105177	0.0009194	-0.0143479	-0.0017686	-0.0139063	0.00852949
0.00457247	0.291428	0.246161	0.264001	-0.0171004	-0.0347752	-0.0275352	-0.0016655	-0.0011636	0.00731017	0.0262525	0.0273396	0.0267784
0.0137174	0.269402	0.239127	0.280793	-0.0168194	-0.0019426	-0.0372039	-0.0140429	-0.0188125	0.00156	0.0746441	0.0468398	0.0706198
0.0411523	0.296821	0.263353	0.300944	0.00727203	0.00182179	-0.0024006	-0.010648	-0.0221665	-0.0158206	0.0740151	0.0935003	0.0913868
0.123457	0.286149	0.259918	0.247054	-0.0005036	-0.0055275	-0.0286789	0.00867739	-0.0179153	-0.0054213	0.104667	0.082682	0.0679078
0.37037	0.269064	0.266617	0.28385	0.00591001	0.0459963	-0.0056274	0.0204618	-0.0151702	0.014901	0.093169	0.088024	0.0677551
1.11111	0.289478	0.231867	0.27982	0.00287945	-0.0143623	0.0137219	0.00067206	0.00501919	0.0151541	0.110411	0.101317	0.104497
3.33333	0.2696	0.256757	0.281498	-0.0380049	-0.0498788	-0.0045951	0.0650217	0.0558488	0.0431217	0.133432	0.137246	0.111641
10	0.270428	0.249796	0.264142	-0.0282742	-0.0588719	-0.0317889	0.0865455	0.0762589	0.0912184	0.177663	0.175929	0.164101
PR
Concentration	DHT			Dexamethasone			Progesterone			Estradiol
	Mean Fbound plate 1	Mean Fbound plate 2	Mean Fbound plate 3	Mean Fbound plate 1	Mean Fbound plate 2	Mean Fbound plate 3	Mean Fbound plate 1	Mean Fbound plate 2	Mean Fbound plate 3	Mean Fbound plate 1	Mean Fbound plate 2	Mean Fbound plate 3
8.6e-09	-0.0027459	-0.0074912	-0.0087435	-0.0029243	-0.002936	-0.0046897	0.00399814	0.0131108	-0.0079355	-0.0098003	0.00539049	-0.0074471
2.58e-08	0.00150097	7.9881e-05	-0.0068702	-0.0039121	0.00347572	-0.0017518	-0.0074937	0.00331891	-0.0007017	-0.0061215	-0.0028825	-0.011119
7.74e-08	-0.0083064	-0.0076054	-0.0077297	0.0114858	-0.001488	-0.0122693	0.00911515	0.0146631	-0.0125225	-0.001693	-0.0093678	-0.0002494
2.32e-07	0.00190589	0.00128805	0.00503857	-0.0004638	-0.0089787	-0.0160788	-0.0048169	0.0017199	-0.0193631	-0.0023758	0.00882505	0.0070551
6.97e-07	0.0116483	-0.00236	-0.0186817	-0.0031346	-0.0009101	-0.0152788	0.0009416	-0.011009	-0.0130867	-0.0093313	0.00249028	-0.0066064
2.09e-06	0.00969183	0.00680743	0.00157064	-0.0079646	0.0016072	0.00584966	-0.0087094	-0.0034403	-0.0017531		-0.0010009	-0.0052666
6.27e-06	-0.0068962	-0.0047538	-0.0020098	0.0175514	-0.0023772	0.0162819	-0.0009526	-0.0037626	0.0100651	-0.0088441	0.00323732	0.0008841
1.88e-05	-0.0023607	0.00149832	-0.0134562	0.00361448	0.00645107	-0.0082389	0.00508413	-0.0044007	-0.0047371	0.00610138	-0.0026386	0.00538379
5.65e-05	0.00102957	0.0100101	-0.0115304	0.00899093	-0.004272	-0.0123259	-0.0046553	-0.012826	0.00639539	0.00506983	-0.0105003	-0.0129636
0.00016935	-0.0056912	-0.0078598	-0.0128403	-0.0086818	-0.0003128	-0.0107692	-0.0001856	-0.0069306	-0.0071628	0.010722	-0.0141758	-0.0104831
0.00050805	-0.0105923	-0.0162938	0.0112909	-0.0137137	-0.0183568	0.0153354	-0.0092859	-0.019992	-0.0004076	-0.0087367	-0.0077517	-0.0142438
0.00152416	0.00850085	-0.0006772	-0.0014998	-0.0040231	0.00651169	0.0238007	-0.0043349	-0.0054395	0.00430605	-0.0002918	-0.0002711	-0.0097925
0.00457247	-0.0067163	-0.0060498	0.00540623	-0.00612	-0.0093953	-0.0114293	0.00323227	0.0181358	0.0112595	-0.0016713	0.00374308	0.00497932
0.0137174	0.0144529	-0.0096562	-0.0164123	0.00449912	-0.00536	-0.0069433	0.0693869	0.0469161	0.0492641	0.00167495	-0.0173211	-0.0038034
0.0411523	-0.0085333	-0.0118251	0.0075328	0.00276373	-0.0036669	-0.0081361	0.113495	0.123387	0.0984098	-0.0071845	-0.0012442	-0.0084655
0.123457	0.00349014	0.00969938	-0.0016556	-0.0092223	0.00830267	-0.0043067	0.157294	0.168459	0.174973	-0.0037101	-0.0019716	0.00253708
0.37037	0.0104916	0.0129421	0.0125655	0.00130175	0.00487426	0.00269882	0.194168	0.200876	0.196631	-0.005592	0.00605846	0.0192224
1.11111	0.0173092	0.0289885	0.0109225	0.00279951	-0.0001272	-0.0067925	0.203276	0.215012	0.183817	0.00987957	0.012147	0.0044711
3.33333	0.0404955	0.0372627	0.039261	0.0158098	0.0261073	0.0102753	0.280969	0.284666	0.273314	0.0147001	0.0146279	0.00602224
10	0.0696269	0.0853353	0.0516539	0.0569105	0.0431674	0.0489462	0.273998	0.321078	0.294775	0.0331281	0.0358951	0.0359016
GR
Concentration	DHT			Dexamethasone			Progesterone			Estradiol
	Mean Fbound plate 1	Mean Fbound plate 2	Mean Fbound plate 3	Mean Fbound plate 1	Mean Fbound plate 2	Mean Fbound plate 3	Mean Fbound plate 1	Mean Fbound plate 2	Mean Fbound plate 3	Mean Fbound plate 1	Mean Fbound plate 2	Mean Fbound plate 3
8.6e-09	0.02673	-0.04824	0.02589	-0.03903	-0.04527	-0.05815	0.00216	-0.02086	0.04705	0.00041	-0.07787	-0.01206
2.58e-08	0.00464	-0.01653	0.02241	-0.00368	-0.04511	0.00169	-0.01824	-0.0039	-0.00232	-0.05058	-0.0663	-0.05249
7.74e-08	-0.06544	-0.01517	0.06285	-0.04733	-0.05449	0.0354	-0.09731	-0.04922	-0.00821	0.03934	-0.0617	0.05197
2.32e-07	-0.01786	-0.05004	-0.00171	-0.02118	-0.04131	0.0227	0.01708	-0.04952	-0.02292	0.00433		-0.05142
6.97e-07	-0.0227	-0.06357	0.02928	-0.02611	-0.00323	0.05556	-0.00398	-0.02252	0.00089	-0.02358		0.00423
2.09e-06	-0.00531	-0.03933	0.03698	0.00244	-0.01714	-0.02087	-0.00415	-0.04817	-0.01342	-0.05663	-0.10071	0.04731
6.27e-06	-0.03846	-0.03966	0.01745	-0.04807	-0.04354	-0.00394	-0.02851	0.04625	-0.0177	-0.00527	-0.00854	0.05172
1.88e-05	-0.0208	-0.03998	-0.00529	-0.03993	-0.03866	-0.02404	0.01529	-0.06681	0.03035	-0.00315		-0.00537
5.65e-05	-0.01199	-0.05282	-0.09382	0.02363	-0.02796		-0.00734	-0.01448	0.00185	-0.00137	-0.02825	0.06112
0.00016935	-0.03029	-0.05068	0.03796	0.01291	-0.02435	0.00968	-0.03233	-0.00311	-0.04769	0.02281	-0.0588	0.08261
0.00050805	-0.01466	-0.063	0.03985	0.026	-0.01133	0.03029	0.03499	-0.04083	0.02718	-0.00472	-0.01466	0.11404
0.00152416	-0.01915	-0.05954	0.00328	-0.01192	0.07806	-0.01155	-0.03587	-0.04717	-0.06201	0.02098	-0.08156	0.03009
0.00457247	-0.0102	-0.03474	0.00866	0.04799	-0.00302	0.00768	0.01822	-0.00778	0.07209	-0.03672	-0.0423	0.04338
0.0137174	-0.03087	-0.08402	0.05974	0.06582	0.03114	0.09237	-0.02487	-0.02906	0.0141	0.00736	-0.05667	-0.04343
0.0411523	-0.02504	0.02307	0.02114	0.12301	0.09283	0.09849	-0.0166	-0.06233	0.02306	-0.0093	-0.01041	0.02596
0.123457	0.00023	-0.04944	0.02874	0.12945	0.09313	0.11248	-0.0428	-0.09011	0.00943	0.0081	-0.06906	-0.01673
0.37037	-0.07584	-0.01492	0.02058	0.12962	0.11201	0.17333	0.00866	0.00754	0.03592	0.0057	-0.00521	-0.00396
1.11111	-0.00594	-0.02152	0.03379	0.16508	0.108	0.17143	0.00733	-0.01692	0.02331	-0.00848	-0.12692	0.04497
3.33333	-0.02939	-0.01438	0.03544	0.12473	0.12795	0.19643	0.01417	0.00681	0.08117	-0.02364	-0.00658	0.02372
10	0.0013	-0.01858	0.04691	0.16446	0.12203	0.2041	0.00628	0.03786	0.07982	0.02283	-0.01721	0.00915

## Sheet: Supplement1C
ER
Concentration	DHT			Dexamethasone			Progesterone			Estradiol
	Dfree mean	SD	N	Dfree mean	SD	N	Dfree mean	SD	N	Dfree mean	SD	N
1e-09	3.38	0.31	64	3.38	0.31	64	3.38	0.31	64	3.38	0.31	64
9e-09	3.27	0.23	10	3.26	0.28	11	3.37	0.32	18	3.36	0.33	10
2.6e-08	3.34	0.3	18	3.33	0.33	16	3.38	0.26	17	3.38	0.33	18
7.7e-08	3.38	0.29	15	3.51	0.28	17	3.42	0.31	16	3.31	0.34	18
2.32e-07	3.34	0.24	18	3.46	0.22	16	3.38	0.36	17	3.31	0.32	18
6.97e-07	3.33	0.54	16	3.39	0.3	15	3.33	0.32	17	3.28	0.34	19
2.09e-06	3.32	0.31	18	3.39	0.27	16	3.3	0.34	18	3.15	0.38	19
6.27e-06	3.39	0.31	17	3.45	0.23	15	3.4	0.3	17	2.88	0.44	18
1.88e-05	3.45	0.25	16	3.43	0.37	18	3.39	0.27	16	2.43	0.35	11
5.65e-05	3.39	0.29	17	3.43	0.32	15	3.48	0.3	18	2.37	0.37	18
0.00016935	3.41	0.24	16	3.33	0.42	18	3.37	0.28	17	2.21	0.28	9
0.00050805	3.4	0.26	18	3.36	0.26	18	3.36	0.33	17	2.3	0.4	11
0.00152416	3.32	0.32	17	3.46	0.27	16	3.35	0.31	16	2.14	0.26	10
0.00457247	3.34	0.32	18	3.42	0.34	17	3.35	0.3	16	2.25	0.28	19
0.0137174	3.41	0.25	16	3.4	0.32	18	3.36	0.35	16	2.28	0.25	18
0.0411523	3.38	0.24	17	3.36	0.32	18	3.35	0.4	17	2.34	0.24	19
0.123457	3.33	0.28	18	3.42	0.25	18	3.32	0.32	19	2.36	0.23	18
0.37037	3.16	0.19	18	3.4	0.3	18	3.27	0.43	18	2.29	0.29	18
1.11111	2.91	0.34	17	3.35	0.28	18	3.1	0.42	19	2.22	0.26	18
3.33333	2.52	0.24	18	3.45	0.35	17	2.86	0.68	18	2.32	0.25	17
10	2.37	0.28	17	3.4	0.36	17	2.74	0.72	17	2.32	0.24	17
AR
Concentration	DHT			Dexamethasone			Progesterone			Estradiol
	Dfree mean	SD	N	Dfree mean	SD	N	Dfree mean	SD	N	Dfree mean	SD	N
1e-09	3.9	0.2	36	3.9	0.2	36	3.9	0.2	36	3.9	0.2	36
9e-09	3.88	0.14	4	3.87	0.11	4	3.93	0.23	10	3.87	0.12	4
2.6e-08	3.91	0.22	11	3.93	0.25	11	3.99	0.25	9	3.94	0.15	11
7.7e-08	3.99	0.36	11	3.91	0.18	10	3.9	0.24	10	4.06	0.33	11
2.32e-07	3.82	0.26	10	3.94	0.21	11	4.06	0.4	10	4.05	0.22	11
6.97e-07	3.97	0.23	11	3.95	0.22	9	3.86	0.34	9	3.87	0.19	9
2.09e-06	3.94	0.22	11	4.06	0.24	10	4.02	0.25	11	4.01	0.13	11
6.27e-06	3.78	0.19	10	3.99	0.31	10	4.05	0.29	11	3.89	0.22	10
1.88e-05	3.71	0.2	11	4	0.28	10	4.01	0.33	11	3.76	0.15	4
5.65e-05	3.41	0.19	11	3.98	0.26	10	4.02	0.27	10	3.94	0.28	11
0.00016935	3.31	0.17	11	3.99	0.29	11	3.88	0.26	11	3.9	0.23	4
0.00050805	3.22	0.15	11	4.11	0.38	10	4.03	0.24	11	3.87	0.09	4
0.00152416	3.12	0.17	10	3.81	0.22	10	4	0.25	9	3.81	0.22	4
0.00457247	3.2	0.2	11	3.98	0.24	11	3.87	0.19	8	3.83	0.2	10
0.0137174	3.16	0.15	11	4.01	0.28	11	4.08	0.34	9	3.79	0.29	11
0.0411523	3.18	0.21	11	4.04	0.4	11	3.87	0.31	10	3.74	0.28	8
0.123457	3.22	0.24	11	3.98	0.23	11	3.84	0.24	11	3.67	0.22	11
0.37037	3.19	0.2	11	4.08	0.19	9	3.95	0.22	11	3.66	0.3	10
1.11111	3.27	0.22	11	4.05	0.25	11	3.87	0.23	9	3.61	0.18	10
3.33333	3.12	0.14	11	3.97	0.22	11	3.77	0.24	11	3.65	0.26	10
10	3.16	0.24	11	4.22	0.25	11	3.52	0.14	11	3.32	0.23	10
PR
Concentration	DHT			Dexamethasone			Progesterone			Estradiol
	Dfree mean	SD	N	Dfree mean	SD	N	Dfree mean	SD	N	Dfree mean	SD	N
1e-09	4.21	0.2	30	4.21	0.2	30	4.21	0.2	30	4.21	0.2	30
9e-09	4.29	0.2	10	4.24	0.16	10	4.15	0.11	8	4.19	0.16	5
2.6e-08	4.18	0.21	7	4.27	0.1	6	4.15	0.13	7	4.17	0.15	8
7.7e-08	4.21	0.16	5	4.2	0.2	7	4.17	0.16	8	4.02	0.19	6
2.32e-07	4.25	0.11	10	4.27	0.23	6	4.4	0.16	7	4.21	0.14	7
6.97e-07	4.26	0.13	8	4.25	0.15	8	4.35	0.12	4	4.17	0.16	6
2.09e-06	4.15	0.18	9	4.22	0.21	8	4.23	0.15	7	4.26	0.2	9
6.27e-06	4.11	0.15	8	4.32	0.22	9	4.12	0.2	7	4.12	0.15	6
1.88e-05	4.24	0.25	8	4.29	0.16	8	4.21	0.14	8	4.25	0.11	6
5.65e-05	4.14	0.24	7	4.2	0.14	9	4.1	0.15	5	4.18	0.34	7
0.00016935	4.13	0.19	8	4.25	0.22	10	4.04	0.14	8	4.17	0.16	6
0.00050805	4.2	0.16	7	4.12	0.15	7	3.94	0.15	8	4.33	0.3	7
0.00152416	4.17	0.15	9	4.13	0.18	7	3.75	0.13	10	4.2	0.13	6
0.00457247	4.23	0.15	8	4.19	0.17	8	3.64	0.12	9	4.29	0.2	6
0.0137174	4.39	0.23	7	4.13	0.16	8	3.55	0.17	9	4.16	0.16	8
0.0411523	4.25	0.22	6	4.13	0.13	8	3.24	0.18	6	4.21	0.15	8
0.123457	4.15	0.15	9	4.01	0.13	6	3.16	0.17	9	4.2	0.16	5
0.37037	4.14	0.19	9	3.83	0.21	7	2.98	0.15	9	4.22	0.11	9
1.11111	4.16	0.14	9	3.85	0.13	8	2.94	0.07	9	4.16	0.18	6
3.33333	4.15	0.2	10	3.82	0.13	6	2.81	0.15	7	4.21	0.13	7
10	4.11	0.17	6	3.59	0.18	8	2.84	0.18	7	4.02	0.09	8
GR
Concentration	DHT			Dexamethasone			Progesterone			Estradiol
	Dfree mean	SD	N	Dfree mean	SD	N	Dfree mean	SD	N	Dfree mean	SD	N
1e-09	4.18	0.36	37	4.18	0.36	37	4.18	0.36	37	4.18	0.36	37
9e-09	4.14	0.1	4	4.19	0.42	10	4.05	0.22	4	4.08	0.1	4
2.6e-08	4.15	0.25	11	4.12	0.31	10	4.25	0.32	10	4.27	0.38	11
7.7e-08	4.15	0.38	11	4.1	0.32	10	4.1	0.28	10	4.2	0.36	11
2.32e-07	4.18	0.32	10	4.24	0.33	11	4.05	0.38	11	4.16	0.34	11
6.97e-07	4.25	0.29	10	4.1	0.27	9	4	0.33	8	4.02	0.31	9
2.09e-06	4.09	0.34	11	4.2	0.37	11	4.07	0.3	10	4.18	0.32	11
6.27e-06	4.15	0.38	10	4.22	0.49	11	4.13	0.32	10	4.16	0.37	11
1.88e-05	4.18	0.34	11	4.17	0.29	11	4.08	0.29	10	3.94	0.17	4
5.65e-05	4.06	0.28	11	4.03	0.3	10	4.14	0.38	10	4.27	0.31	11
0.00016935	4.11	0.27	11	4.13	0.4	10	4.19	0.32	11	4.12	0.13	4
0.00050805	4.13	0.33	11	4.16	0.51	11	4.29	0.34	9	4.06	0.22	4
0.00152416	4.19	0.38	10	3.95	0.35	9	4.11	0.34	9	3.98	0.19	3
0.00457247	4.12	0.37	11	3.93	0.38	8	4.11	0.32	11	4.29	0.26	10
0.0137174	4.09	0.34	11	3.84	0.38	9	4.18	0.4	11	4.19	0.34	11
0.0411523	4.04	0.34	11	3.55	0.32	10	4.14	0.26	11	4.19	0.57	10
0.123457	3.88	0.35	11	3.43	0.32	11	4.16	0.37	11	4.11	0.42	11
0.37037	3.95	0.38	11	3.32	0.37	11	4.05	0.41	10	4.01	0.37	10
1.11111	3.92	0.48	11	3.19	0.27	10	4.09	0.38	11	3.97	0.41	10
3.33333	3.84	0.24	11	3.02	0.41	11	3.97	0.41	11	3.87	0.34	10
10	3.61	0.28	11	2.79	0.26	11	3.89	0.31	11	3.82	0.45	10

## Sheet: Supplement1B
	U2OS				U2OS ER				U2OS AR				U2OS PR				U2OS GR				MCF7				T47D				SKBR3
AR	5.04683	5.03971	4.95151	5.06256	5.03876	5.06326	5.00876	5.06265	5.42913	5.43243			4.51921	4.71738			4.81378	4.72969			4.89073	4.80374	4.69841	4.82353	5.34062	5.38504	5.3062	5.34961	4.3791	4.42676	4.39134	4.34381
ESR1	0	2.51806	2.99617	2.15929	5.49064	5.47494	5.50503	5.4949	2.63652	2.96448			0	2.20875			2.30502	2.953			6.13746	6.13957	6.09017	6.10818	5.86226	5.88216	5.88587	5.872	3.52309	3.50694	3.32085	3.29636
PR	0	0	0	0	2.8095	2.13442	4.09775	3.99948	0	0			5.20728	5.16744			0	0			5.28876	5.31106	5.3878	5.52839	6.43349	6.52733	6.43752	6.48179	2.16084	0	0	0
NR3C1	5.52522	5.53885	5.51731	5.53236	5.44528	5.46476	5.57852	5.61885	5.46171	5.45806			5.63503	5.58844			5.47624	5.58174			5.32617	5.31656	5.21772	5.30822	4.7832	4.93263	4.8266	4.8088	5.2445	5.24135	5.26511	5.24103

## Sheet: Supplement1F
	ER-related ER	Other pathway ER	ER-related WT	Other pathway WT
1	19.1		0.0361
2	14.4		0.0361
3	13.5		0.0361
4	12.9		0.0361
5	11.7		0.0361
6	11.1		1.3
7		7.49		0
8		7.03		0
9		6.26		0
10	5.72		0.0361
11		5.59		0
12		4.86		0
13		4.73		0
14		4.27		0.00452
15	4.22		0.0361
16	4.08		0.0361
17		3.96		0
18	3.79		0
19		3.71		0.0361
20		3.56		0.0066
21		3.44		0
22		3.3		0.0361
23	3.22		0.0356
24	3.18		0.0261
25		3.18		0
26		3.15		0.0361
27		3.01		0.0361
28	2.96		0.00338
29		2.95		0
30		2.92		0.0361
31		2.83		0
32		2.82		0
33		2.82		0.0272
34		2.8		0.0361
35		2.8		0.0361
36		2.8		0.0361
37		2.72		0.0313
38		2.72		0.0361
39		2.71		0.0361
40		2.71		0
41		2.68		0
42		2.62		0.00776
43		2.62		0
44		2.56		0.0361
45	2.46		0.0361
46		2.4		0.00799
47	2.33		0.0361
48		2.33		0
49		2.12		0.0302
50		2.12		0.0279
