# Supplementary material for: A high-throughput platform for single-molecule tracking identifies drug interaction and cellular mechanisms
Source: eLife. 2025 Jan 9;12:RP93183. doi: 10.7554/eLife.93183 (PMC11717362; doi:10.7554/eLife.93183)
Supplement: Figure 3—source data 2. [file elife-93183-fig3-data2.xlsx]

## Sheet: Supplement 2E
Fbound	DMSO
-0.08	1
-0.07	6
-0.06	8
-0.05	18
-0.04	35
-0.03	85
-0.02	113
-0.01	134
0	135
0.01	121
0.02	68
0.03	36
0.04	19
0.05	4
0.06	2
0.25	1

## Sheet: Supplement2F
Compound-plate index	DMSO			E2			Compounds
1	0	0.01933	10
2				0.42286	0.11506	16
3							-0.00116	0.00097	2
4							-0.00336	0.00932	2
5							0.02234	0.00298	2
6							0.01102	0.01965	2
7							0.00261	0.01637	2
8							0.00411	0.0106	2
9							-0.00814	0.0054	2
10							0.25887	0.0047	2
11							-0.02028	0.0076	2
12							-0.0013	0.0053	2
13							-0.02655	0.02156	2
14							0.02293	0.01943	2
15							0.05886	0.00499	2
16							-0.01892	0.02848	2
17							0.00708	0.00998	2
18							0.00204	0.00936	2
19							0.01167	0.02083	2
20							0.01898	0.03487	2
21							0.02226	0.02032	2
22							0.01276	0.01851	2
23							0.0249	0.00674	2
24							0.00813	0.0098	2
25							-0.01967	0.02959	2
26							-0.0453	0.00845	2
27							-0.04355	0.02358	2
28							-0.01564	0.02056	2
29							-0.0123	0.00078	2
30							-0.02124	0.01367	2
31							-0.01959	0.01422	2
32							0.00637	0.00231	2
33							-0.00698	0.00266	2
34							0.00318	0.02219	2
35							-0.00448	0.00321	2
36							0.00314	0.00957	2
37							-0.00644	0.02122	2
38							0.00897	0.02002	2
39							0.43067	0.0807	2
40							0.00789	0.02583	2
41							0.01824	0.01207	2
42							0.01946	0.02933	2
43							-0.04362	0.01893	2
44							-0.01203	0.01489	2
45							0.02529	0.00453	2
46							0.01244	0.04372	2
47							0.36792	0.04688	2
48							-0.02906	0.00751	2
49							0.00601	0.01919	2
50							-0.00207	0.0287	2
51							0.03215	0.01631	2
52							-0.01504	0.01329	2
53							-0.0028	0.02257	2
54							-0.0056	0.02126	2
55							0.00071	0.04786	2
56							0.00555	0.01917	2
57							-0.01777	0.00597	2
58							0.00602	0.01186	2
59							0.01458	0.02924	2
60							0.00578	0.01248	2
61							0.01179	0.03297	2
62							-0.0117	0.01971	2
63							-0.00094	0.01603	2
64							0.00932	0.02247	2
65							0.01865	0.00909	2
66							-0.00626	0.01334	2
67							0.0093	0.01233	2
68							-0.01133	0.01362	2
69							0.01402	0.01652	2
70							0.00699	0.01506	2
71							-0.0031	0.0343	2
72							-0.02339	0.00484	2
73							0.00868	0.01522	2
74							0.00254	0.01354	2
75							-0.01603	0.00427	2
76							-0.02586	0.02829	2
77							0.00225	0.0058	2
78							-0.01024	0.01512	2
79							-0.0242	0.00401	2
80							-0.01243	0.02555	2
81							-0.09695	0.01221	2
82							-0.02662	0.02453	2
83							-0.01493	0.026	2
84							0.01187	0.01058	2
85							-0.00734	0.00768	2
86							0.36965	0.01811	2
87							0.35979	0.00733	2
88							0.00348	0.02936	2
89							-0.00486	0.00567	2
90							-0.00521	0.01472	2
91							0.0153	0.00245	2
92							-0.00432	0.03018	2
93							-0.03164	0.00606	2
94							0.0085	0.03268	2
95							-0.02568	0.02273	2
96							0.00596	0.00261	2
97							0.00881	0.00193	2
98							0.35735	0.00209	2
99							-0.00133	0.02693	2
100							-0.00666	0.03205	2
101							0.0168	0.00692	2
102							0.00671	0.00814	2
103							0.0079	0.0301	2
104							-0.03324	0.00418	2
105							-0.00306	0.01975	2
106							0.0067	0.0205	2
107							-0.01225	0.03835	2
108							0.00085	0.00035	2
109							0.02841	0.00144	2
110							0.01335	0.01621	2
111							0.55109	0.00116	2
112							0.00931	0.00242	2
113							0.01002	0.00294	2
114							-0.01407	0.02486	2
115							0.01581	0.00215	2
116							0.00538	0.00218	2
117							0.01365	0.01064	2
118							-0.01826	0.00208	2
119							0.01841	0.02804	2
120							0.02108	0.0129	2
121							-0.00816	0.00981	2
122							-0.00557	8e-05	2
123							0.01604	0.00054	2
124							0.59976	0.02153	4
125							-0.03192	0.01641	2
126							0.00708	0.02462	2
127							0.00677	0.01934	2
128							-0.00906	0.00374	2
129							0.0046	0.00565	2
130							-0.00125	0.00416	2
131							-0.00393	0.00995	2
132							0.00987	0.03125	2
133							0.10932	0.17288	2
134							0.0116	0.0036	2
135							0.0064	0.00424	2
136							-0.00467	0.01147	2
137							0.0002	0.01404	2
138							-0.0009	0.02085	2
139							-0.03783	0.01497	2
140							0.54475	0.00386	2
141							0.00248	0.02057	2
142	-0.00117	0.02593	9
143				0.43351	0.09281	16
144							-0.01222	0.00407	2
145							-0.04459	0.02236	2
146							-0.0094	0.00981	2
147							-0.01115	0.00379	2
148							-0.00922	0.01543	2
149							-0.02709	0.00855	2
150							-0.02171	0.02651	2
151							0.02799	0.0279	2
152							0.0088	0.00383	2
153							-0.01388	0.00027	2
154							-0.02429	0.03379	2
155							-0.01573	0.03536	2
156							-0.01437	0.03938	2
157							-0.02117	0.01388	2
158							0.02735	0.03044	2
159							0.26388	0.06479	2
160							0.00058	0.01528	2
161							-0.02206	0.0061	2
162							-0.04934	0.04611	2
163							-0.01757	0.02543	2
164							0.02296	0.00857	2
165							-0.00352	0.02649	2
166							-0.01863	0.03351	2
167							-0.00244	0.01976	2
168							0.00474	0.03128	2
169							0.00907	0.02057	2
170							-0.00288	0.00054	2
171							-0.01211	0.02955	2
172							0.25038	0.00743	2
173							-0.03734	0.032	2
174							-0.02865	0.05232	2
175							0.00342	0.013	2
176							-0.00401	0.00058	2
177							0.33228	0.01762	2
178							0.00639	0.01813	2
179							0.00878	0.01975	2
180							0.05907	0.00345	2
181							0.00835	0.01751	2
182							0.00184	0.00643	2
183							0.00171	0.04075	2
184							-0.00611	0.04614	2
185							0.00104	0.01728	2
186							0.00444	0.0199	2
187							0.00414	0.00742	2
188							-0.01982	0.04118	2
189							-0.01829	0.03714	2
190							0.00047	0.04285	2
191							0.00468	0.01087	2
192							-0.01213	0.00949	2
193							0.01055	0.02103	2
194							0.0115		1
195							0.01047	0.02048	2
196							-0.01768	0.02998	2
197							0.00944	0.01257	2
198							0.01253	0.04408	2
199							-0.00116	0.04698	2
200							0.00136	0.02865	2
201							-0.01816	0.04109	2
202							-0.01543	0.02651	2
203							-0.00432	0.01513	2
204							-0.02873	0.01279	2
205							0.01497	0.03241	2
206							-0.00681	0.01644	2
207							-0.01307	0.03633	2
208							0.36472	0.00588	2
209							-0.01776	0.01283	2
210							-6e-05	0.01783	2
211							-0.00402	0.03876	2
212							0.07192	0.12839	2
213							-0.03013	0.01236	2
214							-0.00578	0.02822	2
215							0.01979	0.01098	2
216							-0.03133	0.01691	2
217							-0.01332	0.00041	2
218							0.00864	0.0084	2
219							-0.01866	0.01088	2
220							-0.00316	0.02293	2
221							0.00585	0.0306	2
222							-0.02783	0.01748	2
223							-0.0024	0.01781	2
224							0.00184	0.02235	2
225							0.00645	0.01027	2
226							-0.00834	0.00673	3
227							-0.00779	0.01767	2
228							-0.02615		1
229							-0.00815	0.02579	2
230							-0.0237	0.00661	2
231							-0.01432	0.00135	2
232							5e-05	0.01144	2
233							0.00255	0.00694	2
234							-0.0261	0.0091	2
235							-0.01915	0.00566	2
236							0.00467	0.01978	2
237							0.00834	0.00354	2
238							-0.01196	0.00676	2
239							-0.03201	0.01511	2
240							-0.03158	0.02393	2
241							-0.00283	0.0311	2
242							-0.01403	0.01949	2
243							0.00981	0.02237	2
244							0.25831	0.01425	2
245							-0.0055	0.00162	2
246							-0.02513	0.03908	2
247							0.00818	0.00312	2
248							0.2463	0.35192	2
249							0.49064	0.01752	2
250							-0.00523	0.01211	2
251							-0.02984	0.01189	2
252							0.01564	0.01696	2
253							-0.01341	0.00737	2
254							-0.01238	0.02527	2
255							-0.01802	0.00837	2
256							-0.01393	0.01128	2
257							-0.00327	0.01255	2
258							0.01452	0.01999	2
259							-0.0158	0.01132	2
260							-0.02207	0.00663	2
261							0.00685	0.02078	2
262							-0.02264	0.02225	2
263							-0.0209	0.04669	2
264							-0.01866	0.00811	2
265							-0.00453	0.01798	2
266							-0.00464	0.02038	2
267							-0.02223	0.00313	2
268							-0.00119	0.02624	2
269							0.01045	0.01726	2
270							-0.00314	0.0275	2
271							-0.02011	0.0202	2
272							-0.02672	0.02216	2
273							-0.01804	0.01629	2
274							0.06697	0.02607	2
275							-0.00413	0.02565	2
276							-0.00243	0.02892	2
277							-0.00384	0.00779	2
278							-0.0065	0.01181	2
279							-0.02463	0.05024	2
280							-0.00966	0.00921	2
281							-0.03155	0.03356	2
282							-0.02274	0.02678	2
283	0	0.01138	10
284				0.41086	0.11499	16
285							0.00092	0.04777	2
286							0.29385	0.03803	2
287							-0.00657	0.03191	2
288							0.00702	0.0072	2
289							-0.0091	0.02172	2
290							-0.00366	0.00672	2
291							0.00472	0.00466	2
292							0.01179	0.0161	2
293							0.01927	0.02329	2
294							-0.01521	0.00612	2
295							0.0008	0.00263	2
296							-0.02473	0.02271	2
297							0.01168	0.01696	2
298							0.01293	0.00023	2
299							-0.01527	0.00317	2
300							-0.00862	0.03714	2
301							-0.02752	0.01495	2
302							-0.00811	0.00762	2
303							-0.01081	0.01397	2
304							-0.00352	0.0408	2
305							0.01185	0.01318	2
306							0.0225	0.00211	2
307							0.00327	0.02342	2
308							-0.02351	0.00514	2
309							0.00827	0.0142	2
310							-0.00903	0.02262	2
311							-0.01674	0.00472	2
312							0.00555	0.01442	2
313							0.1866	0.0186	2
314							0.00084	0.03763	2
315							-0.04256	0.01653	2
316							-0.0351	0.02071	2
317							-0.01101	0.02883	2
318							-0.00708	0.00035	2
319							-0.04039	0.02316	2
320							-0.00406	0.00872	2
321							-0.00523	0.00317	2
322							-0.01767	0.04329	2
323							-0.00298	0.00897	2
324							-0.00225	0.0288	2
325							-0.02687	0.0066	2
326							-0.00795	0.02553	2
327							-0.00529	0.0033	2
328							-0.01688	0.01828	2
329							0.00357	0.02026	2
330							0.00261	0.02359	2
331							-0.02067	0.0052	2
332							0.01082	0.01244	2
333							0.00501	0.01825	2
334							-0.00019	0.03966	2
335							-0.01411	0.00563	2
336							-0.02589	0.0166	2
337							-0.00583	0.0177	2
338							-0.02003	0.00439	2
339							-0.01063	0.00283	2
340							0.03154	0.01431	2
341							-0.01724	0.00247	2
342							0.01267	0.03906	2
343							-0.01512	0.06049	2
344							-0.00854	0.02224	2
345							0.01282	0.00263	2
346							-0.00844	0.00235	2
347							-0.00581	0.00662	2
348							0.0242	0.01381	2
349							-0.00628	0.02269	2
350							0.00664	0.01637	2
351							0.0069	0.03052	2
352							0.01464	0.00077	2
353							0.00986	0.02107	2
354							-0.00769	0.01505	2
355							-0.00317	0.0324	2
356							0.00443	0.04074	2
357							-0.00113	0.01874	2
358							-0.02757	0.00227	2
359							-0.01343	0.01495	2
360							0.01289	0.02858	2
361							-0.01151	0.01898	2
362							0.46944	0.00452	2
363							0.01545	0.01811	2
364							-0.01278	0.01678	2
365							0.0262	0.00747	2
366							-0.00469	0.03253	2
367							-0.0096	0.01349	2
368							-0.00421	0.03477	2
369							-0.00176	0.02275	2
370							-0.01233	0.0388	2
371							0.00669	0.04312	2
372							-0.00442	0.00162	2
373							-0.01673	0.00238	2
374							-0.00388	0.0244	2
375							-0.00817	0.01131	2
376							0.01738	0.01564	2
377							0.02397	0.00451	2
378							-0.00992	0.01461	2
379							-0.0212	0.01632	2
380							-0.02156	0.00472	2
381							-0.01563	0.02231	2
382							0.0043	0.01681	2
383							-0.01603	0.01764	2
384							0.00087	0.02135	2
385							0.01179	0.00796	2
386							0.00022	0.00057	2
387							0.00256	0.00561	2
388							-0.02482	0.01077	2
389							0.01452	0.01283	2
390							0.00678	0.00066	2
391							0.01254	0.02705	2
392							-0.02383	0.01848	2
393							0.00311	0.0031	2
394							-0.00635	0.01031	2
395							0.00585	0.00229	2
396							0.00474	0.02182	2
397							0.00762	0.00529	2
398							-0.01268	0.0288	2
399							-0.02169	0.00164	2
400							0.01087	0.00676	2
401							0.02708	0.02323	2
402							0.00727	0.00762	2
403							0.42652	0.01551	2
404							0.00181	0.02917	2
405							0.01612	0.01644	2
406							-0.01288	0.04109	2
407							0.00857	0.00276	2
408							-0.01298	0.00209	2
409							0.02288	0.02141	2
410							-0.0082	0.01006	2
411							0.01739	0.01282	2
412							0.01285	0.00849	2
413							-0.02041	0.00268	2
414							0.0015	0.02436	2
415							-0.01283	0.00815	2
416							-0.00937	0.00488	2
417							-0.00222	0.01686	2
418							0.00069	0.01886	2
419							0.00586	0.01028	2
420							-0.03142	0.01437	2
421							-0.0164	0.00133	2
422							0.0015	0.00487	2
423							0.00718	0.02599	2
424	0	0.03271	10
425				0.42861	0.09838	18
426							-0.00496	0.05184	2
427							0.00957	0.00727	2
428							0.00463	0.03679	2
429							0.05185	0.00343	2
430							0.01492	0.00147	2
431							0.00463	0.00434	2
432							0.01284	0.02459	2
433							0.0149	0.00741	2
434							0.01796	0.00634	2
435							-0.0061	0.00837	2
436							0.00587	0.00512	2
437							0.01131	0.00362	2
438							0.03949	0.02281	2
439							-0.00631	0.00168	2
440							0.52779	0.02766	2
441							0.04447	0.03488	2
442							-0.02635	0.02768	2
443							-0.00976	0.02508	2
444							0.0062	0.02666	2
445							0.00427	0.03189	4
446							0.00574	0.00016	2
447							0.01743	0.04736	2
448							-0.00917	0.00677	2
449							0.02631	0.02802	2
450							0.00235	0.00804	2
451							-0.03799		1
452							-0.0029	0.00813	2
453							-0.00438	0.02406	4
454							0.03363	0.00847	2
455							-0.00287	0.00676	2
456							0.00156	0.00918	2
457							-0.00039	0.02149	4
458							-0.02	0.01469	2
459							0.0004	0.0279	2
460							0.04175	0.03369	2
461							0.01066	0.01106	2
462							-0.00885	0.03584	2
463							0.04832	0.0392	2
464							0.01509	0.05869	2
465							0.01088	0.01259	2
466							0.00926	0.0119	2
467							-0.01109	0.03158	2
468							0.02222	0.02029	2
469							0.03458	0.00047	2
470							-0.00999	0.01222	2
471							-0.01316	0.00524	2
472							0.0052	0.03946	2
473							0.02314	0.00344	2
474							0.02145	0.01484	2
475							-0.00546	0.03661	2
476							-0.02307	0.00455	2
477							-0.00539	0.05141	2
478							0.00095	0.00977	2
479							0.02791	0.03348	2
480							0.01225	0.02775	2
481							-0.01181	0.01049	2
482							0.04052	0.01357	2
483							0.02077	0.0052	2
484							0.04013	0.00233	2
485							0.01648	0.03555	2
486							0.00685	0.00676	2
487							0.00212	0.036	2
488							-0.00297	0.00091	2
489							0.01478	0.00288	2
490							0.00171	0.02203	2
491							-0.05179	0.02153	2
492							0.03968	0.02323	2
493							0.00545	0.01523	4
494							-0.02735	0.01903	2
495							0.0098	0.01083	2
496							-0.00263	0.03136	2
497							0.19475	0.02705	2
498							0.02001	0.0307	2
499							-0.01077	0.00778	4
500							0.20947	0.02523	2
501							0.00665	0.00837	2
502							0.10981	0.0155	2
503							-0.01925	0.00874	2
504							0.48642	0.00846	2
505							-0.0014	0.01703	4
506							0.00205	0.03569	2
507							-0.01236	0.02339	2
508							-0.01793	0.00388	2
509							0.0038	0.02345	2
510							0.01838	0.02195	2
511							0.03547	0.01749	2
512							-0.01975	0.01883	2
513							-0.0095	0.01431	2
514							0.01101	0.00407	2
515							0.01206	0.01349	2
516							0.00861	0.03526	2
517							0.00023	0.02602	4
518							-0.01761	0.02375	2
519							-0.01139	0.02513	2
520							0.03144	0.03935	2
521							-0.02543	0.01471	2
522							0.00186	0.03347	2
523							0.0026	0.02769	2
524							0.01072	0.01953	2
525							0.01194	0.02247	2
526							0.01932	0.04225	2
527							0.03298	0.01552	2
528							-0.01244	0.03576	2
529							-0.00553	0.01536	2
530							0.00919	0.01417	2
531							-0.0105	0.0148	2
532							-0.01595	0.02113	2
533							0.00612	0.00955	2
534							-0.00458	0.00461	2
535							0.02462	0.02572	2
536							0.36253	0.02339	2
537							-0.00755	0.04442	2
538							-0.01211	0.03111	2
539							-0.00411	0.00669	2
540							-0.04891	0.00232	2
541							-0.01045	0.0316	2
542							0.01554	0.01108	2
543							0.01875	0.01091	2
544							0.43217	0.00765	2
545							0.01378	0.00567	2
546							0.00176	0.01552	2
547							0.01155	0.00587	2
548							-0.00695	0.01092	2
549							0.01541	0.01537	2
550							0.01385	0.01087	2
551							0.01118	0.03185	4
552							0.02319	0.03068	2
553							-0.00159	0.00594	2
554							-0.03369	0.01068	2
555							-0.02168	0.00052	2
556							0.00718	0.02374	2
557	0	0.02137	10
558				0.4073	0.11991	16
559							0.00026	0.0054	2
560							-0.00561	0.00889	2
561							0.00159	0.00906	2
562							0.00074	0.01095	2
563							-0.00278		1
564							0.00369	0.00051	2
565							0.00152	0.00851	2
566							0.0252	0.03426	2
567							0.00418	0.01521	2
568							-0.00084	0.02025	2
569							0.01456	0.01861	2
570							0.00169	0.03482	2
571							0.01359	0.02561	2
572							0.02116	0.02601	2
573							0.00808	0.03789	2
574							-0.00079	0.03394	2
575							0.00907	0.0163	2
576							-0.0086	0.02365	2
577							-0.03163	0.01782	2
578							-0.00358	0.02713	2
579							-0.02452	0.01545	2
580							0.0149	0.00053	2
581							0.00092	0.01641	2
582							0.02521	0.02301	2
583							0.00087	0.02214	2
584							-0.02535	0.01402	2
585							0.00272	0.01807	2
586							0.00196	0.00869	2
587							0.0191	0.02442	2
588							-0.00355	0.03133	2
589							-0.00626	0.00891	2
590							0.01177	0.04561	2
591							0.00842	0.01704	2
592							0.00196	0.01273	2
593							-0.02421	0.00163	2
594							0.0114	0.01724	2
595							0.01684	0.02688	2
596							0.03121	0.01733	2
597							0.00475	0.02596	2
598							-0.01144	0.00214	2
599							-0.01022	0.00138	2
600							-0.01944	0.02617	2
601							-0.01331	0.00923	2
602							-0.00676	0.02192	2
603							-0.00776	0.02829	2
604							-0.00751	0.0363	2
605							-0.01428	0.00056	2
606							0.00585	0.02907	2
607							0.02365	0.0116	2
608							0.00664	0.02573	2
609							-0.00609	0.02666	2
610							-0.02786	0.00341	2
611							0.00019	0.0234	2
612							0.01043	0.00271	2
613							0.01667	0.00627	2
614							0.01409	0.01123	2
615							-0.01824		1
616							0.03369	0.01793	2
617							-0.03976		1
618							0.02123	0.01109	2
619							0.49565	0.00621	2
620							0.41161	0.01362	4
621							-0.00154	0.01062	2
622							0.02097	0.02014	2
623							-0.00401	0.01095	2
624							-0.00419	0.01235	2
625							-0.02547	0.02094	2
626							0.00384	0.01944	2
627							-0.02952	0.01227	2
628							0.00037	0.00882	2
629							0.01282	0.05113	2
630							0.01357	0.01707	2
631							0.0123	0.00716	2
632							0.06774	0.03057	2
633							0.02142	0.02861	2
634							0.00907	0.01224	2
635							-0.00401	0.02184	4
636							0.00186	0.00629	2
637							0.01248	0.01451	2
638							-0.01487	0.0329	2
639							-0.02453		1
640							0.01523	0.01407	2
641							-0.00752	0.00224	2
642							-0.00749	0.00063	2
643							0.19927	0.14931	2
644							-0.0044	0.01253	2
645							-0.00383	0.01209	2
646							0.03027	0.02546	2
647							0.00903	0.03667	2
648							0.02439	0.02595	2
649							-0.02255	0.00914	2
650							0.37927	0.0536	2
651							-0.01196	0.01973	2
652							0.00983	0.00933	2
653							0.00489	0.04232	2
654							-0.00052	0.01831	2
655							0.02923	0.00329	2
656							0.01241	0.0009	2
657							0.00669	0.02245	2
658							-0.00739	0.01256	2
659							-0.01831	0.01383	2
660							0.00164	0.03327	2
661							0.01425	0.03694	2
662							-0.01519	0.01112	2
663							0.00838	0.01291	2
664							0.01084	0.00374	2
665							-0.01586	0.00249	2
666							0.00439	0.00831	2
667							0.00386	0.00651	2
668							-0.01333	0.01301	2
669							0.02141	0.0349	2
670							0.02233	0.00612	2
671							0.45275	0.02347	2
672							0.00987	0.03077	2
673							-0.00153	0.01494	2
674							0.02822	0.03559	2
675							-0.01885	0.02074	2
676							0.0192	0.02181	2
677							0.0001	0.03964	2
678							-0.00431	0.01711	2
679							-0.00986	0.01727	2
680							0.02395	0.00312	2
681							0.50466	0.01046	2
682							0.03363	0.02481	2
683							-0.0011	0.00752	2
684							0.00372	0.05417	2
685							0.49288	0.01596	2
686							0.01011	0.01784	2
687							-0.0091	0.01427	2
688							0.01485	0.00429	4
689							-0.00761	0.0059	2
690							-0.1257	0.00045	2
691							0.00754	0.00601	2
692							-0.00984	0.0064	2
693							0.01788	0.01231	2
694							-0.01887	0.00752	2
695							-0.00245	0.01002	2
696	0	0.02059	10
697				0.41951	0.10378	16
698							-0.00856	0.00295	2
699							-0.01142	0.02354	2
700							-0.00164	0.02028	2
701							0.00574	0.02153	2
702							0.01008	0.03435	2
703							-0.00359	0.01238	2
704							0.01038	0.01898	2
705							0.13755	0.09812	2
706							0.21111	0.04045	2
707							-0.00512	0.02256	2
708							0.00441	0.00143	2
709							0.00626	0.02982	2
710							-0.01954	0.02301	2
711							-0.00205	0.00258	2
712							0.01597	0.00347	2
713							-0.00047	0.03041	2
714							0.00431	0.00796	2
715							-0.00269	0.00114	2
716							0.01153	0.01857	2
717							0.04567	0.02474	2
718							-0.00204	0.00588	2
719							0.00665	0.01822	2
720							0.01527	0.00988	2
721							-0.02316	0.00996	2
722							0.00419	0.00039	2
723							0.01085	0.01581	2
724							0.02691	0.02278	2
725							0.02929	0.00599	2
726							-0.01043	0.01308	2
727							-0.00801	0.02061	2
728							-0.00013	0.00421	2
729							-0.00194	0.04519	2
730							0.20561	0.00897	2
731							0.22568	0.05235	2
732							0.01667	0.01631	2
733							0.02792	0.02761	2
734							0.01922	0.01845	2
735							0.0076	0.03065	2
736							0.04362	0.00117	2
737							0.0311	0.0291	2
738							-0.01777	0.00317	2
739							0.00595	0.01097	2
740							-0.04822	0.0527	2
741							0.03743	0.01255	2
742							0.01278	0.01527	2
743							0.02419	0.03013	2
744							0.0072	0.03946	2
745							0.01354	0.03176	2
746							-0.0097	0.00504	2
747							0.01221	0.00893	2
748							0.00497	0.01068	2
749							0.04724	0.01036	2
750							-0.01972	0.02027	2
751							-0.03679	0.01106	2
752							-0.00783	0.01131	2
753							-0.04224	0.01649	2
754							-0.00233	1e-05	2
755							0.02174	0.01114	2
756							0.00893	0.00107	2
757							-0.00687	0.02481	2
758							0.01461	0.01927	2
759							-0.00738	0.00105	2
760							0.02132	0.01943	2
761							-0.01085	0.00107	2
762							0.00769	0.01452	2
763							0.00362	0.01177	2
764							-0.02198	0.00747	2
765							0.0494	0.00401	2
766							0.02419	0.09147	2
767							-0.01039	0.02212	2
768							0.01118	0.03315	2
769							0.01817	0.01507	2
770							0.0173	7e-05	2
771							-0.00511	0.03834	2
772							0.01099	0.00645	2
773							-0.01762	0.00247	2
774							0.01723	0.03167	2
775							0.01873	0.01219	2
776							0.00153	0.02809	2
777							0.00751	0.02928	2
778							0.01265	0.0204	2
779							0.01279	0.00242	2
780							0.01729	0.0495	2
781							0.01422	0.01172	2
782							-0.00975	0.03405	2
783							0.00684	0.04526	2
784							0.00396	0.0216	2
785							0.00066	0.019	2
786							0.00099	0.01584	2
787							-0.03994	0.00167	2
788							0.0396	0.01634	2
789							9e-05	0.01103	2
790							0.02875	0.01599	2
791							-0.00956		1
792							0.00665	0.02744	2
793							-0.02915	0.00176	2
794							0.00592	0.03793	2
795							0.00614	0.00452	2
796							0.04618	0.0111	2
797							0.031	0.01182	2
798							-0.01085	0.00106	2
799							0.00661	0.02021	2
800							-0.01658	0.02411	2
801							-0.00603	0.03729	2
802							0.0162	0.00848	2
803							0.0033	0.04372	2
804							0.02438	0.01254	2
805							0.00837	0.00497	2
806							0.02967	0.0329	2
807							0.01956	0.01522	2
808							-0.02943	0.00166	2
809							-0.01439	0.02359	2
810							0.0201	0.03367	2
811							0.03172	0.06181	2
812							0.01683	0.00531	2
813							0.02566	0.02651	2
814							0.00205	0.02722	2
815							-0.01081	0.05085	2
816							-0.00126	0.01118	2
817							0.01028	0.00126	2
818							-0.01231	0.02044	2
819							0.06485	0.00784	2
820							-0.00789	0.0154	2
821							-9e-05	0.00992	2
822							-0.01935	0.00407	2
823							0.00437	0.03305	2
824							-0.03553	0.00282	2
825							0.01314	0.00616	2
826							-0.00847	0.00104	2
827							-0.04717	0.0153	2
828							-0.00803	0.01197	2
829							-0.03778	0.03013	2
830							-0.0509	0.00269	2
831							-0.02849	0.00851	2
832							0.00815	0.01501	2
833							0.01131	0.02432	2
834							0.01596	0.0059	2
835							0.00585	0.02971	2
836							-0.00423	0.03018	2
837							-0.00799	0.00167	2
838	0	0.02565	10
839				0.39975	0.09752	16
840							0.00106	0.00696	2
841							0.01233	0.02492	2
842							-0.00649	0.02608	4
843							0.00209	0.00564	2
844							-0.01195	0.01281	2
845							0.0059	0.03627	2
846							-0.00179	0.01257	2
847							0.0019	0.03613	2
848							-0.01838	0.02885	2
849							-0.02128	0.0398	2
850							-0.00881	0.00897	2
851							-0.01658	0.00098	2
852							-0.00038	0.01672	2
853							-0.01685	0.02014	2
854							-0.02218	0.03261	2
855							0.00774	0.00432	2
856							0.00631	0.01615	2
857							0.00909	0.01612	2
858							-0.00101	0.02853	2
859							-0.00692	0.01747	2
860							-0.00218	0.0294	2
861							-0.0019	0.00265	2
862							-0.00805	0.00139	2
863							0.32614	0.01837	2
864							-0.01374	0.00519	2
865							0.00609	0.00828	4
866							0.002	0.01001	2
867							0.02221	0.00733	2
868							0.00494	0.05482	2
869							-0.00489	0.00726	2
870							0.00234	0.01589	2
871							-0.00537	0.00407	2
872							-0.0215	0.01516	2
873							-0.0267	0.00633	2
874							-0.00942	0.00695	2
875							-0.02425	0.00757	2
876							-0.00851	0.00398	2
877							-0.03468	0.014	2
878							0.00432	0.01096	2
879							-0.02563	0.02101	2
880							0.0059	0.01353	2
881							-0.04837	0.00011	2
882							-0.0066	0.02183	2
883							-0.02324	0.00578	2
884							-0.06861	0.0087	2
885							0.01056	0.01727	2
886							-0.02707	0.02674	2
887							-0.03144	0.01614	2
888							-0.01929	0.0097	2
889							-0.01066	0.00636	2
890							-0.02732	0.04592	2
891							-0.01298	0.03049	2
892							0.00194	0.01512	2
893							0.00771	0.00245	2
894							0.00226	0.00812	2
895							-0.00201	0.00302	2
896							-0.04425	0.0136	2
897							0.00948	0.01697	2
898							0.00477	0.02226	2
899							0.00245	0.01433	2
900							-0.00945	0.01424	2
901							-0.00036	0.00464	2
902							0.09094	0.0044	2
903							-0.00773	0.00081	2
904							-0.02222	0.01439	2
905							0.01727	0.0141	2
906							-0.00174	0.02049	2
907							-0.01167	0.00084	2
908							-0.0125	0.01323	2
909							0.01038	0.02014	2
910							-0.02319	0.00329	2
911							0.25343	0.01441	2
912							0.00729	0.00313	2
913							0.00611	0.00932	2
914							0.00745	0.00022	2
915							0.0009	0.02114	4
916							-0.00911	0.01738	2
917							-0.01239	0.00251	2
918							0.00342	0.00665	2
919							0.00635	0.00763	2
920							0.00822	0.01307	2
921							-0.01325	0.01065	2
922							-0.05215	0.01896	2
923							-0.00755	0.00794	2
924							0.00949	0.02572	2
925							-0.00169	0.00512	2
926							0.00361	0.03943	2
927							-0.01364	0.01558	2
928							-0.01185	0.02562	2
929							-0.00249	0.00735	2
930							-0.01143	0.00568	2
931							-0.00333	0.01156	2
932							0.01246	0.00419	2
933							0.00216	0.00945	2
934							0.03542	0.00388	2
935							0.01349	0.01271	2
936							0.01562	0.00912	2
937							0.00438	0.00033	2
938							0.00128	0.01993	2
939							0.00307	0.00869	2
940							-0.0104	0.00841	2
941							0.00074	0.01592	2
942							-0.00352	0.00429	2
943							0.00051	0.01447	2
944							0.00467	0.01153	2
945							0.02928	0.0019	2
946							-0.00308	0.00428	2
947							-0.00012	0.01331	2
948							-0.00846	0.00137	2
949							0.00451	0.00165	2
950							-0.00946	0.00866	2
951							0.09381	0.07457	2
952							-0.02084	0.00952	2
953							0.00574	0.01286	2
954							-0.01639	0.01663	2
955							-0.02186	0.00902	2
956							-0.0189	0.00153	2
957							-0.01927	0.04497	2
958							0.00613	0.02413	2
959							-0.02336	0.00482	2
960							-0.00908	0.01819	2
961							-0.01318	0.01499	2
962							-0.00131	0.01963	2
963							-0.00515	0.00613	2
964							-0.01969	0.00938	2
965							-0.01783	0.01755	2
966							-0.01766	0.01724	2
967							0.00126	0.04431	2
968							0.00855	0.02478	2
969							0.00473	0.00472	2
970							0.01741	0.01745	2
971							-0.00352	0.01392	2
972							0.01063	0.01317	2
973							0.01193	0.01724	2
974							0.01004	0.03823	2
975							-0.02504	0.00833	2
976							0.00557	0.0167	2
977	0	0.02722	10
978				0.41566	0.10714	16
979							-0.00957	0.0239	2
980							-0.05588	0.00395	2
981							-0.02086	0.0026	2
982							0.01517	0.00268	2
983							0.01376	0.02166	2
984							0.02237	0.02934	2
985							0.01486	0.01447	2
986							0.01287		1
987							-0.00045	0.01066	2
988							0.00441	0.02363	4
989							0.00372	0.04482	2
990							0.00363	0.02236	2
991							-0.00793	0.02666	2
992							-0.03063	0.01287	2
993							0.03764	0.01081	2
994							0.01445	0.00371	2
995							0.01669	0.01094	2
996							-0.00954	0.02632	2
997							0.00058	0.03004	2
998							-0.00507	0.00265	2
999							0.03288	0.03297	2
1000							0.03064	0.03488	2
1001							-0.01515	0.0091	2
1002							-0.0278	0.01472	2
1003							-0.01578	0.02966	2
1004							-0.01713	0.0489	2
1005							0.00055	0.00242	2
1006							-0.00295	0.02307	2
1007							0.01001	0.00926	2
1008							-0.0071	0.00054	2
1009							-0.01306		1
1010							-0.00826	0.02069	2
1011							0.02999	0.01181	2
1012							0.01164	0.02743	4
1013							0.01433	0.00887	2
1014							0.01314	0.01137	2
1015							-0.00559	0.02538	2
1016							0.03786	0.01629	2
1017							0.00681	0.00833	2
1018							0.00057	0.00105	2
1019							-0.0076	0.01481	2
1020							-0.00584	0.00427	2
1021							0.02542	0.03877	2
1022							0.05322	0.01525	2
1023							-0.00537	0.01453	2
1024							0.01623	0.01581	2
1025							0.00861	0.00262	2
1026							-0.00079	0.00845	2
1027							0.20513	0.00917	2
1028							0.02198	0.00552	2
1029							0.18894	0.0467	2
1030							-0.01005	0.00811	2
1031							-0.01538	0.00746	2
1032							0.01087	0.02159	2
1033							0.01999	0.01324	2
1034							0.17232	0.00449	2
1035							0.03088	0.01669	2
1036							-0.01947	0.03618	2
1037							0.01116	0.017	2
1038							0.00715	0.01256	2
1039							0.00403	0.00392	2
1040							0.14692	0.00809	2
1041							-0.01377	0.01611	2
1042							-0.03797	0.01462	2
1043							0.01096	0.00381	2
1044							0.01796	0.03245	2
1045							-0.03479	0.02018	2
1046							-0.00421	0.01014	2
1047							0.00949	0.03419	2
1048							0.02067	0.04742	2
1049							0.03169	0.01491	2
1050							-0.007	0.02297	2
1051							-0.02335	0.03337	2
1052							0.00995	0.00788	2
1053							0.01945	0.01653	2
1054							0.00292	0.01002	2
1055							1e-05	0.01118	2
1056							0.35066	0.00723	2
1057							0.34376	0.03576	2
1058							-0.06084	0.01215	2
1059							0.02718	0.02355	2
1060							0.00054	0.05488	2
1061							-0.06266		1
1062							0.00041	0.04384	2
1063							-0.02695	0.01777	2
1064							-0.016	0.0139	2
1065							-0.02064		1
1066							0.00949	0.01261	2
1067							0.00387	0.00517	2
1068							-0.00946	0.01289	2
1069							0.00979	0.03961	2
1070							0.00464	0.03559	4
1071							-0.00956	0.01397	2
1072							0.01008	0.02679	2
1073							-0.02508	0.01228	2
1074							-0.0063	0.00383	2
1075							0.00649	0.01769	2
1076							0.03763	0.02739	2
1077							0.00823	0.03355	2
1078							0.00339	0.00808	2
1079							-0.03652	0.03476	2
1080							-0.05768	0.0192	2
1081							-0.00779	0.00825	2
1082							-0.00533	0.01787	2
1083							-0.03892	0.01588	2
1084							-0.00671	0.01723	2
1085							0.00747	0.02998	2
1086							0.00244	0.03412	2
1087							0.00377	0.04662	2
1088							-0.01513	0.01993	2
1089							-0.00176	0.01128	2
1090							-0.00171	0.01989	2
1091							0.00213	0.01769	2
1092							0.00277	0.00304	2
1093							-0.0189	0.0097	2
1094							0.12769	0.00478	2
1095							0.00532	0.00533	2
1096							0.00978	0.0207	2
1097							0.02274	0.03258	2
1098							0.01283	0.02075	2
1099							0.01429	0.01153	2
1100							0.02356	0.02771	2
1101							-0.02838	0.00151	2
1102							-0.00101	0.00427	2
1103							0.07277	0.02455	2
1104							0.02195	0.00574	2
1105							0.00666	0.03762	2
1106							-0.00105	0.00354	2
1107							0.03368	0.02787	2
1108							0.00123	0.04112	2
1109							5e-05	0.0018	2
1110							0.00651	0.0176	2
1111							-0.01332	0.01001	4
1112							0.01945	0.00077	2
1113	0	0.01128	10
1114				0.40766	0.09776	16
1115							0.00729	0.00839	2
1116							-0.00819	0.0001	2
1117							-0.00554	0.00039	2
1118							-0.01707	0.00343	2
1119							0.00203	0.00469	2
1120							0.02071	0.01031	2
1121							0.00126	0.01761	2
1122							0.03062	0.01519	2
1123							0.01596	0.00634	2
1124							0.0238	0.00374	2
1125							0.44581	0.0158	2
1126							0.00348	0.00679	2
1127							-0.00224	0.0172	2
1128							-0.01462	0.00561	2
1129							0.02597	0.01384	2
1130							0.00813	0.02984	2
1131							-0.01544	0.01026	2
1132							0.02037	0.01948	2
1133							-0.01721	0.01217	2
1134							-0.00062	0.0011	2
1135							0.02669	0.00056	2
1136							0.00765	0.0003	2
1137							0.01014	0.01177	2
1138							-0.00766	0.00535	2
1139							-0.00886	0.02899	2
1140							-0.00327	0.0144	2
1141							0.00364	0.00183	2
1142							-0.00702	0.02339	2
1143							0.00509	0.0045	2
1144							0.01627	0.00514	2
1145							-0.00022	0.0078	2
1146							0.02075	0.012	2
1147							0.00822	0.01571	2
1148							-0.00557	0.00838	2
1149							0.0006	0.0097	2
1150							-0.02549	0.04505	2
1151							-0.00513	0.00552	2
1152							-0.00584	0.00675	2
1153							0.0171	0.01592	2
1154							0.00706	0.00949	2
1155							-0.02764	0.00838	2
1156							-0.0065	0.01465	2
1157							0.02161	0.01584	2
1158							-0.00978	0.00504	2
1159							0.009	0.04564	2
1160							-0.03074	0.00314	2
1161							0.024	0.02002	2
1162							0.0086	0.01372	2
1163							-0.00196	0.02444	2
1164							-0.00868	0.00098	2
1165							0.0199	0.01368	2
1166							0.02931	0.00461	2
1167							-0.00034	0.01507	2
1168							-0.00724	0.01889	2
1169							0.00812	0.03295	2
1170							0.00481	0.02683	2
1171							-0.02186	0.00466	2
1172							-0.00016	0.00834	2
1173							0.00103	0.00868	2
1174							0.01092	0.01473	2
1175							-0.00172	0.00994	2
1176							-0.00437	0.0204	2
1177							0.00688	0.00201	2
1178							-0.03661	0.00044	2
1179							0.00681	0.01014	2
1180							0.00528	0.01982	2
1181							-0.00554	0.02052	2
1182							-0.02448	0.01984	2
1183							0.01472	0.00132	2
1184							0.01103	0.00538	2
1185							0.4444	0.00048	2
1186							0.00839	0.00787	2
1187							0.01184	0.02203	2
1188							0.03103	0.02994	2
1189							0.00688	0.02564	2
1190							0.00421	0.01212	2
1191							-0.01833	0.03437	2
1192							-0.00207	0.00408	2
1193							0.00394	0.00397	2
1194							-0.01208	0.04695	2
1195							0.03904	0.01129	2
1196							-0.01042	0.02021	2
1197							0.01517	0.02684	2
1198							-0.02238	0.00569	2
1199							0.02853	0.02423	2
1200							0.00213	0.03007	2
1201							-0.01822	0.00926	2
1202							0.02005	0.01989	2
1203							0.01388	0.00095	2
1204							0.00166	0.02865	2
1205							0.00111	0.00044	2
1206							-0.00755	0.04873	2
1207							-0.01269	0.03064	2
1208							0.01753	0.01583	2
1209							-0.00057	0.01696	2
1210							0.00052	0.00483	2
1211							0.01455	0.01158	2
1212							-0.00853	0.01951	2
1213							-0.01547	0.03215	2
1214							-0.0029	0.02432	2
1215							-0.00038	0.00563	2
1216							-0.0212	0.01322	2
1217							0.01365	0.01605	2
1218							0.39417	0.01732	2
1219							0.02387	0.01569	2
1220							0.00718	0.0017	2
1221							-0.0168	0.00643	2
1222							-0.01734	0.01883	2
1223							0.01625	0.01145	2
1224							0.01689	0.01096	2
1225							0.01342	0.00248	2
1226							0.01502	0.01748	2
1227							0.01427	0.01248	2
1228							0.01652	0.00366	2
1229							0.00735	0.00096	2
1230							0.0142	0.0046	2
1231							-0.02419	0.00472	2
1232							-0.00678	0.04105	2
1233							-0.01429	0.00954	2
1234							0.00811	0.01651	2
1235							0.01226	0.01576	2
1236							-0.00665	0.00344	2
1237							-0.00092	0.01974	2
1238							0.02413	0.03914	2
1239							0.0004	0.00731	2
1240							0.01689	0.00612	2
1241							-0.00566	0.0256	2
1242							0.00519	0.01025	2
1243							-0.0176	0.00901	2
1244							-0.005	0.0043	2
1245							-0.01599	0.01643	2
1246							-0.00627	0.02493	2
1247							0.01471	0.01478	2
1248							0.01377	0.02797	2
1249							0.02112	0.0021	2
1250							-0.00422	0.02275	2
1251							-0.00309	0.02489	2
1252							-0.01192	0.01642	2
1253							0.01427	0.00211	2
1254							0.02128	0.00283	2
1255	0	0.01443	10
1256				0.43572	0.10403	16
1257							0.02686	0.00774	2
1258							0.02209	0.00084	2
1259							0.00666	0.02016	4
1260							0.02896	0.0123	4
1261							0.04045	0.0198	2
1262							-0.00032	0.01189	2
1263							0.00782	0.01175	2
1264							0.02139	0.0238	2
1265							0.01541	0.01929	2
1266							0.04974	0.01343	2
1267							0.01724	0.01196	2
1268							0.00449	0.00402	2
1269							0.01624	0.02745	2
1270							0.0017	0.02028	2
1271							0.03268	0.01844	2
1272							0.00424	0.01365	2
1273							-0.02224	0.01153	2
1274							0.00186	0.01143	2
1275							0.02862	0.00186	2
1276							0.0161	0.01467	2
1277							0.6738	0.00628	2
1278							0.02776	0.02759	2
1279							0.02526	0.02516	2
1280							0.01705	0.0347	2
1281							0.00533	0.00998	2
1282							0.0307	0.01154	2
1283							-0.01819		1
1284							0.03035	0.02427	2
1285							0.01919	0.0146	2
1286							0.0604	0.00466	2
1287							0.03204	0.02804	2
1288							0.01606	0.03065	2
1289							0.02683	0.01697	2
1290							0.00533	0.0281	2
1291							0.01891	0.00768	2
1292							-0.0066	0.02794	2
1293							0.01818	0.00351	2
1294							0.00857	0.00534	2
1295							0.01562	0.01482	2
1296							0.02651	0.03414	2
1297							0.05955	0.03311	2
1298							0.12222	0.01923	2
1299							0.01402	0.00372	2
1300							0.01858	0.04058	2
1301							0.02645	0.02882	2
1302							0.00499	0.00821	2
1303							0.01024	0.00904	2
1304							0.02022	0.023	2
1305							0.00218	0.0062	2
1306							0.003	0.03282	2
1307							0.00892	0.00235	2
1308							0.01061	0.0069	2
1309							0.01069	0.00739	2
1310							0.02725	0.00401	2
1311							-0.00909	0.02295	2
1312							0.53017	0.00391	2
1313							0.02815	0.00968	2
1314							0.03207	0.02293	2
1315							0.02537	0.01953	2
1316							0.00318	0.04444	2
1317							0.01666	0.00433	2
1318							0.51005	0.00349	2
1319							0.04956	0.00522	2
1320							0.01334	0.00349	2
1321							0.01749	0.05154	2
1322							0.49571	0.02749	2
1323							-0.00159	0.02662	2
1324							0.03581	0.00945	2
1325							0.00554	0.03764	2
1326							0.04286	0.0188	2
1327							0.00631	0.02287	2
1328							0.00908	0.0141	2
1329							0.01635	0.06279	2
1330							0.02901	0.02735	2
1331							-0.00884	0.0246	2
1332							-0.00418	0.02369	2
1333							0.009	0.01854	2
1334							-0.00347	0.01476	2
1335							0.02797	0.00405	2
1336							0.01863	0.00078	2
1337							0.0089	0.02421	2
1338							0.02873	0.03159	2
1339							-0.00095	0.01394	2
1340							0.00936	0.02028	2
1341							0.01334	0.0215	2
1342							0.00668	0.01504	2
1343							3e-05	0.00175	2
1344							0.01015	0.00838	2
1345							0.02433	0.00894	2
1346							-0.01409	0.00654	2
1347							0.0097	0.02653	4
1348							0.0083	0.0029	2
1349							0.01989	0.01417	2
1350							-0.00258	0.02499	2
1351							0.00245	0.01695	2
1352							0.0304	0.00964	2
1353							-0.00144	0.02041	2
1354							0.01082	0.01349	2
1355							0.01631	0.02562	2
1356							0.04226	0.0143	2
1357							0.03023	0.00352	2
1358							0.00956	0.01955	2
1359							0.00919	0.00156	2
1360							0.02309	0.01397	2
1361							0.00314	0.02428	2
1362							0.01952	0.00324	2
1363							0.02349	0.01839	2
1364							0.00954	0.00311	2
1365							0.05264	0.01912	2
1366							0.05823	0.02419	2
1367							0.01998	0.02868	2
1368							0.02084	0.00765	2
1369							0.03329	0.029	2
1370							0.01491	0.01344	2
1371							0.01233	0.01484	2
1372							0.04287	0.04485	2
1373							0.01904	0.01904	2
1374							0.03272	0.01517	2
1375							0.00799	0.01139	2
1376							0.00844	0.03093	4
1377							0.03697	0.02884	2
1378							0.0176	0.02957	2
1379							0.02801	0.02931	2
1380							0.03207	0.04402	2
1381							0.01287	0.00614	2
1382							-0.00604	0.02558	2
1383							0.04439	0.00202	2
1384							0.02277	0.01698	2
1385							0.00971	0.00804	2
1386							0.01348	0.01856	2
1387							0.02958	0.00879	2
1388							0.00235	0.01846	2
1389							0.0002	0.00055	2
1390							0.0226	0.02703	2
1391							0.03828	0.01424	2
1392							0.00531	0.02939	2
1393	0	0.02541	10
1394				0.40397	0.10791	16
1395							0.00913	0.00234	2
1396							-0.00106	0.03721	2
1397							0.00483	0.01515	2
1398							0.04281	0.05426	2
1399							-0.01145	0.03965	2
1400							0.00533	0.02362	2
1401							0.00031	0.00151	2
1402							0.03678	0.01289	2
1403							0.02822	0.0159	2
1404							-0.03799	0.01642	2
1405							0.02612	0.01339	2
1406							0.0054	0.02274	2
1407							0.01718	0.02003	2
1408							-0.00808	0.00904	2
1409							0.4785	0.0004	2
1410							-0.0087	0.03805	2
1411							-0.00301	0.03734	2
1412							-2e-05	0.04863	2
1413							0.01871	0.02127	2
1414							-0.02073	0.04342	2
1415							0.47408	0.00944	2
1416							0.09768	0.00387	2
1417							0.01272	0.00678	2
1418							-0.0075	0.00246	2
1419							-0.02025	0.03915	2
1420							-0.0064	0.0194	2
1421							0.00085	0.03236	2
1422							0.02434	0.03595	2
1423							-0.02054	0.02477	2
1424							0.00275	0.02267	2
1425							0.02928	0.02268	2
1426							0.00886	0.01694	2
1427							0.00122	0.0537	2
1428							0.00507	0.03113	2
1429							0.02022	0.01394	2
1430							-0.01107	0.00586	2
1431							0.00746	0.00418	2
1432							0.015	0.01866	2
1433							-0.00306	0.03976	2
1434							-0.00763	0.00926	2
1435							-0.01308	0.04134	2
1436							-0.02878	0.03864	2
1437							-0.03016	0.0072	2
1438							0.02652	0.00132	2
1439							0.0085	0.03198	2
1440							0.00142	0.01313	2
1441							0.02167	0.02565	2
1442							-0.00326	0.00051	2
1443							-0.00967	0.02221	2
1444							0.01761	0.00119	2
1445							0.00738	0.05492	2
1446							-0.03513	0.0122	2
1447							0.00218	0.03127	2
1448							0.0163	0.02643	2
1449							-0.02291	0.02131	2
1450							0.01072	0.01524	2
1451							0.02908	0.00236	2
1452							0.02851	0.00723	2
1453							0.02106	0.01915	2
1454							0.00491	0.04185	2
1455							-0.02542	0.00105	2
1456							0.00618	0.02686	2
1457							-0.0186	0.02955	2
1458							-0.01673	0.01201	2
1459							-0.00388	0.03994	2
1460							0.0388	0.00014	2
1461							0.00635	0.04611	3
1462							-0.0205	0.01134	2
1463							0.48781	0.00043	2
1464							0.01227	0.02554	2
1465							-0.00441	0.02533	4
1466							-0.01208	0.00821	2
1467							-0.01651	0.0398	2
1468							-0.00641	0.01645	2
1469							0.00399	0.01549	2
1470							-0.00213	0.02725	2
1471							-0.03282	0.03095	2
1472							-0.04627	0.02833	2
1473							0.00906	0.0464	2
1474							-0.00842	0.0445	4
1475							0.0056	0.00012	2
1476							-0.00331	0.00471	2
1477							-0.02588	0.04828	2
1478							0.0258	0.02387	2
1479							-0.0141	0.01782	2
1480							0.01205	0.04644	2
1481							0.0328	0.00214	2
1482							-0.00256	0.03224	2
1483							-0.00273	0.0134	2
1484							-0.00202	0.03148	2
1485							-0.03485	0.0091	2
1486							-0.02141	0.0097	2
1487							0.00871	0.03395	2
1488							-0.00021	0.03734	2
1489							0.01154	0.00986	2
1490							-0.00337	0.03338	2
1491							-0.01649	0.00026	2
1492							0.00331	0.0161	2
1493							0.00927	0.0303	2
1494							0.00101	0.03324	2
1495							-0.00085	0.0186	2
1496							0.01516	0.00771	2
1497							0.0077	0.02957	2
1498							0.00639	0.04646	2
1499							-0.0008	0.0301	2
1500							0.04292	0.03262	2
1501							0.01075	0.00471	2
1502							0.00842	0.0302	2
1503							-0.00317	0.02831	2
1504							0.00623	0.03003	2
1505							-0.03153		1
1506							-0.01022	0.02943	2
1507							0.03709	0.01165	2
1508							-0.02525	0.01465	2
1509							0.00762	0.00052	2
1510							-0.02067	0.02589	2
1511							-0.00648	0.05703	2
1512							0.01373	0.03342	2
1513							-0.00592	0.00802	2
1514							-0.0034	0.01092	2
1515							-0.00418	0.03358	2
1516							-0.00105	0.00029	2
1517							0.02593	0.03694	2
1518							0.01167	0.01859	2
1519							0.01994	0.01127	2
1520							0.00268	0.04366	2
1521							-0.01469	0.05694	2
1522							-0.01803	0.00756	2
1523							0.01906	0.02666	2
1524							0.01458	0.02212	2
1525							-0.01516	0.01305	2
1526							0.00807	0.00082	2
1527							-0.03687	0.01045	2
1528							0.02048	0.03339	2
1529							0.3297	0.03037	2
1530							0.02229	0.00473	2
1531							0.02622	0.01334	2
1532	0	0.01812	10
1533				0.41044	0.0985	16
1534							-0.01892	0.00853	2
1535							-0.00191	0.02137	2
1536							-0.03014	0.00813	2
1537							-0.02418	0.02639	2
1538							0.02505	0.02575	2
1539							8e-05	0.02114	2
1540							-0.0129	0.00557	2
1541							-0.02649	0.02083	2
1542							-0.00219	0.00437	2
1543							-0.01165	0.00407	2
1544							-0.0163	0.0075	2
1545							-0.02025	0.01337	2
1546							-0.04327	0.03666	2
1547							-0.00812	0.00048	2
1548							-0.01617	0.02984	2
1549							-0.02676	0.00915	2
1550							-0.02217	0.0179	4
1551							0.01555	0.01426	2
1552							-0.01478	0.01054	2
1553							0.01082	0.04895	2
1554							0.00814	0.01368	2
1555							-0.02019	0.00398	2
1556							-0.03537	0.02058	2
1557							-0.01722	0.01534	2
1558							-0.00564	0.00573	2
1559							0.01549	0.02334	2
1560							0.00054	0.00703	2
1561							-0.01918	0.00335	2
1562							-0.01006	0.02937	2
1563							-0.01587	0.04947	2
1564							0.00319	0.03444	2
1565							-0.0323	0.04425	2
1566							0.02573	0.05678	2
1567							-0.00063	0.05342	2
1568							0.00071	0.04052	2
1569							-0.00461	0.00428	2
1570							0.02942	0.0078	2
1571							0.0003	0.03551	2
1572							0.06222	0.02736	2
1573							-0.02546	0.02212	2
1574							-0.00375	0.01623	2
1575							-0.00186	0.02416	2
1576							-0.00361	0.01091	2
1577							0.01424	0.03279	2
1578							-0.02989	0.00614	2
1579							-0.01882	0.00894	2
1580							-0.01186	0.0206	2
1581							0.00645	0.04627	2
1582							5e-05	0.04658	2
1583							0.01479	0.012	2
1584							0.01204	0.03289	2
1585							-0.00394	0.00935	2
1586							0.01724	0.03222	2
1587							0.00318	0.00287	2
1588							0.00391	0.01665	2
1589							0.01448	0.00638	2
1590							-0.00176	0.03513	2
1591							-0.02291	0.02353	2
1592							-0.02298	0.02774	2
1593							0.00201	0.03521	2
1594							0.00135	0.02778	2
1595							0.00509	0.01884	2
1596							-0.01532	0.04881	2
1597							-0.01264	0.02541	2
1598							0.00386	0.02681	2
1599							-0.0136	0.00978	2
1600							-1e-05	0.03824	2
1601							-0.01106	0.00886	2
1602							-0.02776	0.01041	2
1603							-0.02249	0.05903	2
1604							0.01228	0.05947	2
1605							0.00034	0.00027	2
1606							-0.00325	0.0077	2
1607							-0.04403	0.00029	2
1608							-0.00055	0.00384	2
1609							-0.02265	0.01342	2
1610							-0.00377	0.00565	2
1611							-0.00776	0.00531	2
1612							-0.00483	0.04486	2
1613							-0.02086	0.00795	2
1614							-0.00615	0.01946	2
1615							-0.01561	0.02945	2
1616							0.02362	0.03651	2
1617							-0.0075	0.0475	2
1618							-0.01345	0.02007	2
1619							-0.02129	0.00327	2
1620							-0.00229	0.00307	2
1621							0.06008	0.00566	2
1622							-0.02653	0.01246	2
1623							-0.00199	0.05381	2
1624							-0.00819	0.03968	2
1625							-0.02089	0.03612	2
1626							-0.04431	0.00127	2
1627							0.02385	0.01519	2
1628							0.01348	0.04354	2
1629							-0.00164	0.00685	2
1630							-0.00929	0.00226	2
1631							0.01105	0.02126	2
1632							-0.01824	0.02755	2
1633							-0.01314	0.00164	2
1634							-0.00622	0.05367	2
1635							-0.011	0.001	2
1636							0.00632	0.00645	2
1637							0.0042	0.03069	2
1638							-0.01993	0.01559	2
1639							-0.02767	0.02398	2
1640							-0.00501	0.02599	2
1641							-0.04367	0.02723	2
1642							-0.02137	0.00113	2
1643							-0.01675	0.03279	4
1644							-0.00762	0.0188	2
1645							-0.01633	0.03714	2
1646							-0.00411	0.02448	2
1647							0.00731	0.02337	2
1648							-0.02866	0.04527	2
1649							-0.01883	0.00928	2
1650							-0.04009	0.01085	2
1651							0.0073	0.00305	2
1652							-0.0213	0.00957	2
1653							0.00285	0.02341	2
1654							-0.0307	0.01165	2
1655							-0.01043	0.01074	2
1656							-0.00165	0.02831	2
1657							0.01089	0.01224	2
1658							-0.02539	0.0157	2
1659							-0.0207	0.00488	2
1660							0.00053	0.00958	2
1661							0.00061	0.03083	2
1662							-0.01946		1
1663							-0.01322	0.04531	2
1664							-0.01603	0.02606	2
1665							-0.01573	0.00796	2
1666							-0.00215	0.0377	2
1667							-0.00984	0.00592	2
1668							-0.01471	0.05388	2
1669							-0.00642	0.02765	2
1670							-0.00903	0.00737	2
1671							0.01704	0.0007	2
1672	0	0.03353	10
1673				0.41846	0.10635	16
1674							0.00164	0.02976	2
1675							0.03205	0.02483	2
1676							0.01353	0.01823	2
1677							0.00017	0.00686	2
1678							0.2661	0.00285	2
1679							0.10712	0.06883	2
1680							0.02621	0.02153	2
1681							0.04155	0.01474	2
1682							-0.01604	0.03864	2
1683							0.05281	0.02921	2
1684							0.0233	0.00216	2
1685							-0.00088	0.04037	2
1686							-0.00936	0.02615	2
1687							0.01115	0.00057	2
1688							0.04589	0.02645	2
1689							0.01697	0.03585	2
1690							0.02668	0.01285	2
1691							0.04462	0.00776	2
1692							0.03828	0.00045	2
1693							0.00985	0.00143	2
1694							0.01705	0.0159	2
1695							0.03146	0.01157	2
1696							0.03228	0.00761	2
1697							0.02448	0.02297	2
1698							0.00072	0.00418	2
1699							0.01543	0.01368	2
1700							-0.00266	0.03679	2
1701							0.02255	0.01047	2
1702							0.01442	0.01263	2
1703							0.00731	0.01722	2
1704							0.01579	0.02324	2
1705							-0.02201	0.00468	2
1706							0.01507	0.02268	2
1707							0.01616	0.01963	4
1708							0.01723	0.00332	2
1709							0.00976	0.01753	2
1710							0.01583	0.01018	2
1711							-0.00092	0.00906	2
1712							0.02421	0.00413	2
1713							0.00334		1
1714							-0.01606	0.01077	2
1715							-0.01828	0.0138	2
1716							0.02213	0.0236	2
1717							0.01621	0.01111	2
1718							0.01616	0.0322	2
1719							-0.00307	0.00729	2
1720							0.03091	0.00556	2
1721							0.00795	0.00446	2
1722							0.01771	0.02314	2
1723							-0.01032	0.00964	2
1724							-0.00942	0.04756	2
1725							0.01705	0.0135	2
1726							-0.00476	0.0355	2
1727							0.00831	0.02011	2
1728							-0.00307	0.03045	2
1729							0.0015	0.01225	2
1730							0.00367	0.0083	2
1731							-0.03979	0.01379	2
1732							0.04594	0.01539	2
1733							-0.02433	0.01997	2
1734							0.00668	0.03128	2
1735							-0.01322	0.01831	2
1736							0.00111	0.02766	2
1737							0.03232	0.01621	2
1738							0.03252	0.02803	2
1739							0.01305	0.01477	2
1740							-0.02876	0.01129	2
1741							0.01498	0.04788	2
1742							0.00717	0.00449	2
1743							0.01328	0.03515	2
1744							0.03183	0.02362	2
1745							0.00772	0.01225	2
1746							-0.00124	0.01973	2
1747							-0.0002	0.02861	2
1748							0.03473	0.00976	4
1749							0.01384	0.01943	2
1750							-0.00403	0.02271	2
1751							0.01441	0.04719	2
1752							0.02894	0.00752	2
1753							-0.00968	0.00314	2
1754							0.02147	0.00313	2
1755							-0.01876	0.01872	2
1756							0.00408	0.0042	2
1757							0.03168	0.03284	2
1758							-0.0012	0.0024	2
1759							-0.01227	0.02217	2
1760							-0.00946	0.03292	2
1761							0.00747	0.02287	2
1762							0.11738	0.06791	2
1763							-0.00733	0.00315	2
1764							0.00296	0.00551	2
1765							0.03626	0.01221	2
1766							-0.01711	0.00989	2
1767							-0.00406	0.03139	2
1768							-0.02695	0.02228	2
1769							0.04389	0.00682	2
1770							-0.00115	0.0052	2
1771							0.0231	0.03825	2
1772							-0.00102	0.05122	2
1773							-0.00818	0.02643	2
1774							0.01855	0.01469	2
1775							-0.02909	0.00404	2
1776							-0.01882	0.0423	2
1777							-0.00754	0.01498	2
1778							0.01362	0.0363	2
1779							-0.02286	0.02355	2
1780							-0.00072	0.047	2
1781							0.00609	0.02781	2
1782							0.03609	0.02869	2
1783							0.0337	0.02627	2
1784							0.02164	0.00809	2
1785							-0.00046	0.01952	2
1786							0.00285	0.00043	2
1787							0.00112	0.02485	2
1788							0.01206	0.00201	2
1789							0.00098	0.02412	2
1790							0.02768	0.00925	2
1791							0.02496	0.00232	2
1792							0.02681	0.04482	2
1793							-0.02036	0.00528	2
1794							-0.00381	0.0131	2
1795							0.02962	0.02639	2
1796							0.00787	0.00622	2
1797							0.02179	0.00598	2
1798							-0.01411	0.00562	2
1799							-0.00345	0.03303	2
1800							0.00659	0.02691	2
1801							0.01302	0.00036	2
1802							0.01081	0.04487	2
1803							0.03568	0.00384	2
1804							-0.00937	0.02425	2
1805							0.0204	0.00505	2
1806							0.00177	0.02688	2
1807							0.0102	0.027	2
1808							-0.00051	0.02746	2
1809							0.00841	0.02556	2
1810							0.00178	0.00287	2
1811							-0.00491	0.02986	2
1812	0	0.01567	10
1813				0.42409	0.10827	16
1814							0.04559	0.00541	2
1815							0.03659	0.00667	2
1816							0.01696	0.00696	2
1817							0.00761	0.00273	2
1818							0.01645	0.0055	2
1819							0.0186	0.00486	2
1820							0.02058	0.02306	2
1821							-0.00206	0.02962	2
1822							0.0153	0.00508	2
1823							0.00937	0.00211	2
1824							0.02022	0.0066	2
1825							0.01332	0.00562	2
1826							-0.00957	0.0231	2
1827							-0.0089	0.03064	2
1828							0.00741	0.00397	2
1829							-0.01073	0.02425	2
1830							0.00224	0.03651	2
1831							0.00387	0.00711	2
1832							0.04515	0.02544	2
1833							-0.00633	0.00985	2
1834							0.00636	0.0235	2
1835							-0.00016	0.00472	2
1836							0.00264	0.01166	2
1837							0.02509	0.02396	2
1838							0.01394	0.01101	4
1839							0.00177	0.01704	2
1840							0.03633	0.01879	2
1841							0.02242	0.00053	2
1842							0.02678	0.02025	2
1843							0.0101		1
1844							-0.00224	0.00767	2
1845							0.02294	0.00817	2
1846							0.0426	0.00511	2
1847							0.02025	0.02533	2
1848							-0.00278	0.01695	2
1849							0.00381	0.01287	2
1850							0.07777		1
1851							0.03957	0.00105	2
1852							0.011	0.00444	2
1853							-0.00956	0.01019	2
1854							0.01696	0.0033	2
1855							0.01027	0.01079	2
1856							0.03775	0.00833	2
1857							0.02938	0.01232	2
1858							-0.01266	0.00833	2
1859							0.02553	0.00724	2
1860							0.00074	0.00923	2
1861							0.05071	0.03547	2
1862							0.01387	0.02459	2
1863							0.02465	0.00807	2
1864							0.00312	0.00951	2
1865							0.0127	0.02132	2
1866							-0.00535	0.00329	2
1867							0.01639	0.02869	2
1868							-0.01062	0.02759	2
1869							0.01813	0.00927	2
1870							-0.0162		1
1871							0.00707	0.00991	2
1872							0.01611	0.01997	2
1873							0.01492	0.0075	2
1874							0.03476	0.0169	2
1875							0.00987	0.01892	2
1876							0.03395	0.00064	2
1877							0.32716	0.02043	2
1878							0.01665	0.01494	2
1879							0.02696	0.01559	2
1880							0.04346	0.02263	2
1881							-0.05793	0.01007	2
1882							-0.00383	0.02561	2
1883							0.02385	0.03323	2
1884							-0.01562	0.01666	2
1885							0.01321	0.02157	2
1886							0.0104	0.0007	2
1887							0.02516	0.01801	2
1888							0.00805	0.03117	2
1889							0.01734	0.00631	2
1890							0.01629	0.00723	2
1891							0.00061	0.01012	2
1892							-0.00067	0.01217	2
1893							0.01271	0.01728	2
1894							0.01511	0.00744	4
1895							0.01595	0.01004	2
1896							-0.0068	0.01293	2
1897							0.02579	0.00389	2
1898							0.34185	0.02815	2
1899							8e-05	0.02057	2
1900							0.00161	0.02639	2
1901							0.01774	0.00961	2
1902							0.02752	0.00398	2
1903							0.01967	0.01665	2
1904							0.02	0.02735	2
1905							0.43096	0.01648	2
1906							0.01804	0.00558	2
1907							0.00776	0.00928	2
1908							0.00419	0.02183	2
1909							0.02375	0.01567	2
1910							0.01569	0.0307	2
1911							0.00448	0.01113	4
1912							0.01479	0.01412	4
1913							0.01207	0.01635	2
1914							0.01651	0.0402	2
1915							0.00136	0.01896	2
1916							0.01907	0.00179	2
1917							0.01249	0.00398	2
1918							0.02113	0.01777	3
1919							0.0117	0.00516	2
1920							0.00386	0.00825	2
1921							0.01925	0.03694	2
1922							0.2937	0.01654	2
1923							0.01756	0.00153	2
1924							0.00422	0.01081	2
1925							0.02237	0.01585	2
1926							0.02439	0.00957	2
1927							0.02051	0.00034	2
1928							0.02575	0.00961	2
1929							0.00179	0.00765	2
1930							0.04111	0.00708	2
1931							0.00811	0.00025	2
1932							-0.00234	0.01252	2
1933							0.01119	0.0016	2
1934							0.0238	0.02565	2
1935							0.01123	0.01266	4
1936							0.02977	0.03088	2
1937							-0.00725	0.02812	2
1938							-0.01229	0.01651	2
1939							0.02301	0.00923	2
1940							0.02767	0.01731	2
1941							0.01874	0.01531	2
1942							0.01863	0.02825	2
1943							0.01413	0.01877	2
1944							0.02834	0.00636	2
1945							-0.01431	0.01935	2
1946							0.02095	0.03721	2
1947							0.01824	0.03625	2
1948	0	0.02087	10
1949				0.4005	0.10075	16
1950							0.03396	0.01366	2
1951							0.02868	0.00134	2
1952							-0.00308	0.01391	2
1953							0.05619	0.01801	2
1954							0.00847	0.01514	2
1955							-0.00433	0.00616	2
1956							-0.00031	0.01324	2
1957							0.00081	0.01745	2
1958							0.01264	0.00985	2
1959							-0.0164	0.00219	2
1960							0.01601	0.01212	2
1961							0.02363	0.00582	2
1962							-0.01086	0.01144	2
1963							0.01969	0.01199	2
1964							0.01037	0.02346	2
1965							-0.02367	0.01029	2
1966							-0.00384	0.0049	2
1967							-0.01829	0.0119	2
1968							-0.00071	0.02313	2
1969							0.01602	0.01804	2
1970							-0.01931	0.03699	2
1971							-0.00075	0.02078	2
1972							0.01646	0.01371	2
1973							0.00832	0.00818	2
1974							0.005	0.02313	2
1975							0.00372	0.00123	2
1976							-0.01344	0.0066	2
1977							0.0057	0.00515	2
1978							-0.01745	0.00402	2
1979							-0.01208	0.00477	2
1980							0.02311	0.0106	2
1981							-0.0071	0.03224	2
1982							-0.00377	0.00407	2
1983							-0.00314	0.00646	2
1984							-0.00432	0.04657	2
1985							0.02401	0.03714	2
1986							0.01087	0.01689	2
1987							0.00896	0.00386	2
1988							-0.00116	0.01443	2
1989							-0.01473	0.01264	2
1990							0.02582	0.00442	2
1991							-0.01044	0.00527	2
1992							0.01937	0.02063	2
1993							-0.01903	0.03613	2
1994							0.01036	0.00143	2
1995							0.00425	0.01233	2
1996							-0.00024	0.01463	2
1997							0.00738	0.03738	2
1998							0.00381	0.00753	2
1999							0.03398	0.00588	2
[truncated: 6,742 more rows]

## Sheet: Supplement 2B
Molecule Concentration	Plate 1	Plate 2	Plate 3	Plate 4	Plate 5	Plate 6	Plate 7	Plate 8	Plate 9	Plate 10	Plate 11	Plate 12	Plate 13	Plate 14	Plate 15	Plate 16	Plate 17	Plate 18	Plate 19	Plate 20	Plate 21	Plate 22	Plate 23	Plate 24	Plate 25	Plate 26	Plate 27	Plate 28	Plate 29	Plate 30	Plate 31	Plate 32	Plate 33	Plate 34	Plate 35	Plate 36
1e-09	0	-0.00117	0	0	0	0	0	0	0	0	0	0	0	0	0	0	0	0	0	0	0	0	0	0	0	0	0	0	0	0	0	0	0	0	0	0.00499
2e-08	0.19327	0.23041	0.16167	0.21331	0.13845	0.20087	0.20251	0.18475	0.20868	0.23428	0.21183	0.19225	0.19438	0.20376	0.21137	0.18525	0.15463	0.18035	0.1214	0.16794	0.14973	0.21241	0.23864	0.21726	0.18902	0.24885	0.21855		0.21596	0.21229	0.22162	0.22061	0.18425	0.17753	0.19588
3.9e-08	0.32839	0.36569	0.30598	0.33235	0.31616	0.32259	0.3046	0.33484	0.30935	0.31944	0.26495	0.35294	0.32229	0.31098	0.27605	0.30258	0.27748	0.28037	0.24937	0.37628	0.22983	0.33783	0.31692	0.2572	0.26434	0.33001	0.34757		0.3205	0.31803	0.30379	0.34147	0.31967	0.30878	0.27527	0.28373
7.8e-08	0.36934	0.42622	0.42519	0.39786	0.41192	0.41087	0.37836	0.39166	0.38882	0.40221	0.37339	0.38201	0.40839	0.40861	0.38669	0.36861	0.35612	0.33065	0.3393	0.34294	0.36281	0.40694	0.39177	0.39024	0.35967	0.39864	0.40701	0.37166	0.38459	0.41985	0.36659	0.40032	0.38832	0.42072	0.34771	0.41026
1.56e-07	0.46347	0.44808	0.47101	0.46314	0.45417	0.46379	0.44259	0.45329	0.43974	0.48202	0.43392	0.44194	0.44996	0.46646	0.44111	0.43961	0.43569	0.42578	0.3988	0.41357	0.41077	0.45659	0.42755	0.43	0.41247	0.42627	0.45824	0.46981	0.45344	0.4553	0.43014	0.46612	0.44603	0.43472	0.41911	0.48573
3.13e-07	0.49997	0.48841	0.46485	0.45717	0.48306	0.49307	0.46503	0.48374	0.46835	0.50501	0.47907	0.46615	0.48187	0.49359	0.44841	0.45992	0.45795	0.4683	0.42189	0.43596	0.42629	0.46429	0.4631	0.45155	0.43512	0.46338	0.47984	0.4905	0.46716	0.4667	0.4561	0.46771	0.45361	0.48153	0.48235	0.49514
6.25e-07	0.50519	0.49975	0.46985	0.48268	0.47297	0.47246	0.46825	0.48374	0.48118	0.52134	0.48515	0.47602	0.47573	0.49918	0.46538	0.47715	0.47934	0.46968	0.44102	0.46666	0.44221	0.47023	0.47505	0.45813	0.44229	0.46738	0.50559	0.48857	0.47564	0.48879	0.46266	0.46868	0.45663	0.48461	0.48437	0.52552
1.25e-06	0.50612	0.50497	0.50463	0.48417	0.47575	0.49397	0.46193	0.49668	0.48055	0.50598	0.49041	0.49483	0.51365	0.49684	0.48211	0.48562	0.47406	0.46825	0.48164	0.45157	0.43121	0.47913	0.47794	0.45655	0.44911	0.48826	0.49353	0.49701	0.47737	0.4931	0.47589	0.49651	0.48071	0.51459	0.48652	0.51755
2.5e-06	0.51712	0.50453	0.48366	0.49862	0.50592	0.49843	0.47472	0.49657	0.48462	0.51545	0.49299	0.47743	0.50142	0.51334	0.49288	0.483	0.49751	0.48361	0.44026	0.46915	0.46415	0.47706	0.45873	0.45531	0.45387	0.47134	0.48763	0.50025	0.49947	0.48834	0.47194	0.50487	0.45994	0.5059	0.47254	0.51275

## Sheet: Supplement 2A
Rep1		Rep2_bulk			ER Known Inhibitors			4-hydroxytamoxifen			Bazedoxifene			Estradiol			Fulvestrant			All Hits
0.03154	0.01431	0.00247	0.01796
0.01085	0.01581	0.0337
0.01908	0.01927
0.25887	0.0047
		0.21805	0.00652																	0.21805	0.00652
0.20561	0.00897	0.26757	0.00409																	0.26757	0.00409
0.22568	0.05235
0.14692	0.00809	0.1306	0.06644																	0.1306	0.06644
0.25343	0.01441	0.29895																		0.29895
0.14116	0.08543	0.19504	0.01983																	0.19504	0.01983
-0.04362	0.01893	-0.03727	0.01367
0.02132	0.01943	0.00762	0.00863
-0.01762	0.00247	-0.0051	0.01575
-0.01999	0.01688	-0.01636	0.0222
-0.05223	0.0056	-0.1096	0.01188																	-0.1096	0.01188
-0.06226	0.03172	-0.04856	0.01325																	-0.04856	0.01325
-0.04777	0.01476	-0.11886	0.04239																	-0.11886	0.04239
-0.04425	0.0136	-0.10916																		-0.10916
0.02686		0.00773	0.01648
		-0.02379	0.00623
-0.02752	0.01495	-0.03731	0.00887
-0.01377	0.01611	-0.02008	0.00402
-0.04226	0.01963	-0.03866	0.00354
-0.00739	0.00565	-0.01504	3e-05
-0.00206	0.03859	-0.00686	0.00657
0.02426	0.03362
-0.02601	0.02279
-0.03755	0.02877
0.00034	0.00432
-0.04355	0.02358	-0.06073	0.00269																	-0.06073	0.00269
-0.0676	0.01933
-0.07758	0.01214
-0.08556	0.00534
-0.0453	0.00845	-0.02538
-0.01959	0.01422	-0.04078	0.0138
-0.02171	0.02651	-0.05489	0.00455
0.00084	0.03763	-0.00179	0.02155
-0.00583	0.0177	-0.01101	0.02737
0.00377	0.04662	0.01704
-0.02943	0.00166	-0.01822
-0.04717	0.0153	-0.03274
-0.00322	0.03487
0.00245	0.01433	-0.00213
-0.05215	0.01896	-0.04436
-0.00333	0.01156
0.02179	0.00043	0.025	0.02785
0.02501	0.00206
0.35066	0.00723	0.34783	0.01976																	0.34783	0.01976
0.34376	0.03576	0.35952																		0.35952
0.36792	0.04688	0.26299	0.01756																	0.26299	0.01756
0.26388	0.06479	0.08097	0.02357																	0.08097	0.02357
0.36965	0.01811	0.29106	0.05142																	0.29106	0.05142
0.35979	0.00733	0.31002	0.00156																	0.31002	0.00156
0.35735	0.00209	0.28528	0.0609																	0.28528	0.0609
0.34073	0.01282	0.32124	0.03009																	0.32124	0.03009
0.33845	0.01049	0.33331	0.03923																	0.33331	0.03923
0.33277	0.00368
0.02735	0.03044	0.00761	0.02712
-0.00851	0.00398	0.00493	0.00423
-0.00411	0.00669	0.01674	0.01173
0.01916	0.01017	0.01546	0.02556
0.01652	0.00366	0.00249	0.022
-0.00113	0.00973	-0.02765	0.01828
0.00474	0.03506
0.03851
0.01891	0.00433
0.03215	0.01631	-0.02819
-0.02086	0.00212	-0.00107	0.00997
-0.00769	0.01505	0.00729	0.01207
-0.00515	0.00613	-0.0236	0.01178
0.00735	0.02411	-0.00367	0.01422
-0.02695	0.0304	0.01917	0.01871
-0.00944	0.02047	0.00959	0.03285
0.03873	0.01565
0.02842	0.00545
0.04875	0.04531
0.00474	0.01728
-0.00332	0.02271
0.2661	0.00285	0.34243			0.34243															0.34243
0.55109	0.00116	0.47301	0.00654		0.47301	0.00654											0.47301	0.00654		0.47301	0.00654
0.52779	0.02766	0.47523			0.47523															0.47523
0.46944	0.00452	0.46273	0.00665		0.46273	0.00665														0.46273	0.00665
0.52817	0.02126	0.46876	0.00886		0.46876	0.00886								0.46876	0.00886					0.46876	0.00886
0.50466	0.01046	0.44851	0.01487		0.44851	0.01487														0.44851	0.01487
0.53017	0.00391	0.48628	0.00962		0.48628	0.00962														0.48628	0.00962
0.47408	0.00944	0.47516	0.02095		0.47516	0.02095														0.47516	0.02095
0.48781	0.00043	0.4844	0.01269		0.4844	0.01269														0.4844	0.01269
0.4723	0.01936	0.47583	0.0096		0.47583	0.0096														0.47583	0.0096
0.40623	0.00851	0.43708	0.00052		0.43708	0.00052														0.43708	0.00052
0.46411	0.00676	0.51173	0.00232		0.51173	0.00232														0.51173	0.00232
		0.46619	0.01255		0.46619	0.01255														0.46619	0.01255
0.48642	0.00846	0.44678	0.00758		0.44678	0.00758														0.44678	0.00758
0.29385	0.03803	0.30143	0.00905		0.30143	0.00905														0.30143	0.00905
0.36888		0.30657	0.00137		0.30657	0.00137														0.30657	0.00137
0.32614	0.01837	0.29049	0.03994		0.29049	0.03994														0.29049	0.03994
0.32716	0.02043	0.30774	0.01578		0.30774	0.01578														0.30774	0.01578
0.29653	0.03738	0.30068	0.00068		0.30068	0.00068		0.30068	0.00068											0.30068	0.00068
0.33838	0.03183
0.39141	0.01784				0.39141	0.01784
0.34278	0.01549
0.50302		0.44129	0.00619		0.44129	0.00619														0.44129	0.00619
0.2463	0.35192	0.44538	0.00334		0.44538	0.00334														0.44538	0.00334
0.32414	0.02254	0.3547	0.00815		0.3547	0.00815														0.3547	0.00815
0.41161	0.01362	0.35436	0.01766		0.35436	0.01766					0.35436	0.01766								0.35436	0.01766
0.37227	0.02394	0.38796			0.38796															0.38796
-0.00559	0.02538
0.02277	0.01698
0.01961	0.01017	0.01961			0.01961	0.01017
-0.0563	0.01004
-0.10279	0.00033
-0.02926	0.02247
		0.05578	0.00961																	0.05578	0.00961
-0.00581	0.00662	-0.00897	0.01079
-0.03525	0.00754
-0.02614	0.00358
-0.02707	0.02674	-0.06096	0.00411
-0.02967	0.02216	-0.02034	0.03571
-0.04089	0.00499	-0.01635	0.00847
-0.00958	0.01039
-0.01127	0.0018
0.00085	0.00035	-0.02113	0.00281
		0.00445	0.00331
-0.0056	0.02126
		-0.01468	0.01427
0.01314	0.00616	0.01617	0.00577
		0.46542	0.00745																	0.46542	0.00745
0.49565	0.00621	0.45675	0.00236																	0.45675	0.00236
0.44581	0.0158	0.43918	0.00316																	0.43918	0.00316
0.25831	0.01425	0.22901	0.02301																	0.22901	0.02301
0.03968	0.02323	0.06107	0.03731																	0.06107	0.03731
0.19475	0.02705	0.16377																		0.16377
0.10981	0.0155	0.09796	0.02205																	0.09796	0.02205
0.06774	0.03057	0.06821	0.00106																	0.06821	0.00106
0.19927	0.14931	0.09708																		0.09708
0.4393	0.02176	0.41413	0.01523																	0.41413	0.01523
0.05264	0.01912	0.05129																		0.05129
0.4444	0.00048	0.45159	0.00472																	0.45159	0.00472
0.01625	0.01145	0.18408	0.00627																	0.18408	0.00627
0.10712	0.06883	0.17438	0.01846																	0.17438	0.01846
0.27932	0.00154	0.33628	0.00578																	0.33628	0.00578
0.10079	0.03881
0.08186	0.01829
0.06496	0.05851
0.18712	0.19144
0.4855	0.0077
0.31102	0.02809
0.12449	0.00175
0.15118	0.00668
0.12403	0.02512	0.16563																		0.16563
0.34185	0.02815	0.3057	0.01561																	0.3057	0.01561
0.37927	0.0536	0.39511	0.00589																	0.39511	0.00589
0.3791	0.01161	0.40758																		0.40758
0.08952	0.00226
0.25367	0.08426
0.11591	0.04176
0.3297	0.03037	0.32416	0.0002																	0.32416	0.0002
0.06743	0.00429	0.06487																		0.06487
		0.1597	0.01598																	0.1597	0.01598
-0.1257	0.00045
		-0.00722	0.0065
		0.04711																		0.04711
0.25028	0.01709	0.2531	0.04291																	0.2531	0.04291
		0.44777	0.00455																	0.44777	0.00455
		0.24808	0.0134																	0.24808	0.0134
0.30209	0.0155	0.34079	0.06185																	0.34079	0.06185
0.17232	0.00449	0.1622	0.00585																	0.1622	0.00585
0.05748	0.03955	0.07884	0.01831																	0.07884	0.01831
0.51005	0.00349	0.46662																		0.46662
0.49571	0.02749	0.45346	0.01583																	0.45346	0.01583
0.12769	0.00478	0.07437	0.01813																	0.07437	0.01813
0.4785	0.0004	0.48202																		0.48202
0.43096	0.01648	0.41584																		0.41584
0.2937	0.01654	0.30366	0.00646																	0.30366	0.00646
0.13274	0.0086	0.14382																		0.14382
0.09001	0.02983
0.4753	0.01516	0.49076	0.01045																	0.49076	0.01045
0.08854	0.05677	0.1041	0.04282																	0.1041	0.04282
0.04272	0.06223	0.08496	0.05842																	0.08496	0.05842
0.07736	0.01129
0.28326	0.00686
-0.01698	0.00276
-0.01178
-0.04367	0.02723	-0.06734	0.05225																	-0.06734	0.05225
-0.05793	0.01007	-0.07369	0.01683																	-0.07369	0.01683
-0.13379	0.00974
-0.19996	0.01276
-0.18995	0.01374
0.11738	0.06791	0.09502	0.05729																	0.09502	0.05729
0.11786	0.00204	0.08935	0.03255																	0.08935	0.03255
0.06151		0.06831	0.02025																	0.06831	0.02025
0.13061	0.02299	0.19565	0.01864																	0.19565	0.01864
-0.08435	0.00345
-0.0558	0.00658
		0.17711	0.03532																	0.17711	0.03532
0.05678	0.00508
0.20513	0.00917	0.13367																		0.13367
0.03828	0.00045	0.09612	0.01419																	0.09612	0.01419
0.26575	0.02181	0.33753	0.05317																	0.33753	0.05317
0.19648	0.05432
0.36253	0.02339	0.37058																		0.37058
0.06008	0.00566	0.11029	0.00162																	0.11029	0.00162
0.05281	0.02921	0.14133	0.02282																	0.14133	0.02282
0.14102	0.06156	0.20556																		0.20556
0.12222	0.01923	0.11524	0.01739																	0.11524	0.01739
0.49288	0.01596	0.43356	0.00199																	0.43356	0.00199
-0.02906	0.00751	0.02793
-0.09695	0.01221	-0.15462	0.02672																	-0.15462	0.02672
		0.09429	0.02375																	0.09429	0.02375
0.1866	0.0186	0.27422	0.04783																	0.27422	0.04783
0.21111	0.04045	0.20521	0.00666																	0.20521	0.00666
-0.03679	0.01106	-0.07913																		-0.07913
-0.04891	0.00232	-0.05653																		-0.05653
0.43217	0.00765	0.43138	0.00717																	0.43138	0.00717
-0.06084	0.01215	-0.06375	0.02595																	-0.06375	0.02595
-0.06266		-0.04853	0.00053																	-0.04853	0.00053
0.04618	0.0111	0.08545	0.00959																	0.08545	0.00959
0.06485	0.00784	0.06142																		0.06142
		0.04573	0.04189																	0.04573	0.04189
0.0604	0.00466	0.05527	0.02366																	0.05527	0.02366
0.07277	0.02455	0.05959	0.02244																	0.05959	0.02244
0.03904	0.01129	0.09413	0.00724																	0.09413	0.00724
0.39417	0.01732	0.38115	0.01962																	0.38115	0.01962
0.09768	0.00387	0.15981	0.01896																	0.15981	0.01896
0.05619	0.01801	0.12667	0.01422																	0.12667	0.01422
-0.04429	0.02615	-0.07043	0.03459																	-0.07043	0.03459
0.0996	0.00295	0.29177	0.04413																	0.29177	0.04413
0.01461	0.01598	-0.00511
-0.09416	0.01437	-0.06918																		-0.06918
0.31575	0.01514	0.33181	0.00173																	0.33181	0.00173
0.11229	0.00967	0.14177																		0.14177
0.43307	0.00017	0.44617	0.00488																	0.44617	0.00488
-0.00908	0.01685	0.012
0.05956	0.09674
-0.00774	0.02671	0.13946	0.0318																	0.13946	0.0318
-0.04942	0.01981	-0.07218	0.01449																	-0.07218	0.01449
0.27544	0.01757	0.28651	0.01653																	0.28651	0.01653
-0.04172	0.00424	-0.07328	0.0138																	-0.07328	0.0138
0.32401	0.01641	0.313	0.00933																	0.313	0.00933
-0.06174	0.02413	-0.0962	0.02363																	-0.0962	0.02363
-0.09129	0.01383	-0.08426	0.00364																	-0.08426	0.00364
-0.09418	0.00167	-0.05131	0.02719																	-0.05131	0.02719
0.30404	0.00862	0.23791	0.01585																	0.23791	0.01585
-0.19246	0.03453	-0.23212	0.00063																	-0.23212	0.00063
0.09515	0.01195	0.14653	0.06484																	0.14653	0.06484
-0.0692	0.06601
0.25492	0.04988
0.33904	0.00915
0.06314	0.02559
-0.05049	0.03171
0.11034
-0.00111
-0.01381
0.05971
0.05568
0.05084	0.02326
0.15701	0.02716
0.05205	0.0053
0.27656	0.01901
-0.07242	0.00252
0.22682	0.0387
0.20889	0.03577
-0.07064	0.01884
-0.14968	0.02364
0.14278	0.01609
0.20333	0.02323
-0.00913
-0.09483	0.01693
0.25665	0.0046
-0.06054	0.02676
0.05078	0.00285
0.11117	0.02749
0.08419	0.05083
0.18968	0.00474
-0.0908	0.01086
0.00273
-0.0808	0.01026
0.22909	0.00084
-0.06049	0.04021
0.11224	0.0211
0.09084	0.00859
0.05301	0.01763
0.05091	0.01111
-0.10516	0.00016
0.23196	0.0026
0.06513
0.05253
0.011
-0.05487	0.00708
-0.06991	0.01508
-0.08448	0.01569
-0.06931	0.01207
0.35774	0.00076
0.005	0.01048
		0.00163	0.00255
0.00576	0.01423	-0.00636	0.01714
-0.00336	0.00932	0.00111	0.00835
0.02234	0.00298	0.01728	0.0193
0.01102	0.01965	-0.00873	0.0029
0.00261	0.01637	-0.0139	0.02143
-0.01551	0.02347	0.01393	0.01825
-0.00447	0.0074	0.0032	0.01434
-0.02028	0.0076	-0.01022	0.00787
0.00996	0.01335	-0.01775	0.01211
-0.01582	0.02405
0.02293	0.01943	0.02433	0.00622
0.02976	0.04637	0.01434	0.00608
-0.01892	0.02848	-0.04568	0.02341
0.011	0.0157	0.01145	0.03026
0.00115	0.00633	-0.01651	0.02269
0.00341	0.01276	0.01252	0.0292
0.01898	0.03487	0.00486	0.00602
0.02226	0.02032	0.02226	0.03665
-0.01307	0.03173	-0.01127	0.01485
0.00677	0.02136	0.00583	0.02749
-0.00072	0.01808	-0.01028	0.02328
-0.01967	0.02959	-0.00195	0.00629
-0.01749	0.02656	-0.00596	0.01121
-0.0123	0.00078	-0.04143	0.01276
-0.02219	0.02155	-0.04352	0.00427
0.00637	0.00231	-0.00939	0.00961
-0.00698	0.00266	0.02115	0.05912
0.00318	0.02219	0.00562	0.00533
-0.00448	0.00321	-0.01362	0.02002
0.00314	0.00957	0.0012	0.0096
0.00897	0.02002	0.01025	0.01871
0.00553	0.01831	0.0184
0.01083	0.01125	0.0099	0.01899
0.01946	0.02933	0.01066	0.00493
-0.01203	0.01489	0.02305	0.02009
0.02529	0.00453	-0.01207	0.01179
0.01299	0.03093	-0.0077	0.00374
0.00601	0.01919	-0.02299	0.02203
-0.00207	0.0287	-0.01173	0.02433
-0.01504	0.01329	0.00344	0.03051
-0.0028	0.02257	0.00498	0.0127
0.00071	0.04786	0.03699	0.00868
0.00555	0.01917	0.0049	0.00507
-0.01777	0.00597	0.0015	0.01191
0.00602	0.01186	-0.01255	0.02398
0.00982	0.02878	0.02064	0.02658
0.00578	0.01248	0.01868	0.00704
0.01179	0.03297	-0.00095	0.00387
-0.0117	0.01971	0.02611	0.00895
-0.00094	0.01603	0.00946	0.01894
0.00932	0.02247	-0.00082	0.01689
0.01865	0.00909	0.0127	0.04836
-0.00626	0.01334	-0.00748	0.02917
0.0093	0.01233	0.04027	0.00438
-0.01133	0.01362	0.00091
0.01402	0.01652	0.00426	0.00078
0.02014	0.01817
-0.0031	0.0343	-0.00053	0.03749
-0.02339	0.00484	0.00582	0.0087
0.00868	0.01522	0.02359	0.02406
0.00254	0.01354	0.02495
-0.01603	0.00427	0.02421	0.0079
-0.02586	0.02829	0.00778	0.0061
0.00225	0.0058	0.03211	0.02094
-0.01024	0.01512	-0.01379	0.02008
-0.0242	0.00401	-0.02243	0.02762
-0.01243	0.02555	0.00096	0.04096
-0.00934		-0.00727	0.01331
-0.0094	0.00981	0.00085	0.01285
-0.01383		-0.01163	0.00229
0.00169		0.01469
-0.01892	0.00853	0.00205	0.02359
0.04771		0.0018	0.00494
0.00609		0.01728	0.0325
		-0.01104	0.0148
-0.0004		-0.00844	0.01797
-0.02662	0.02453	0.01794	0.00344
-0.01493	0.026	-0.00149	0.0024
0.01187	0.01058	-0.0181	0.01486
-0.00734	0.00768	0.00788	0.0003
		0.00473	0.01214
		-0.00446	0.00465
		-0.00388	0.00949
0.00058	0.01528	-0.01048	0.00126
-0.02206	0.0061	0.01618	0.02359
-0.01757	0.02543	-0.01789	0.00868
0.01709	0.0148	0.00421	0.00655
-0.0011	0.01651	-0.01398	0.02006
		-0.02137	0.01453
		0.00053	0.00512
0.01207	0.01649	0.00158	0.01753
-0.0025		0.00063	0.03209
0.00879		0.0015	0.01347
-0.05997		0.00306	0.00564
		-0.00709	0.01099
-0.00753	0.02345	-0.01154	0.02081
-0.00486	0.00567	-0.00918	0.01716
-0.00521	0.01472	0.00579	0.00182
0.0153	0.00245	-0.00482	0.01442
-0.00432	0.03018	-0.01664	0.0097
-0.03164	0.00606	-0.04731	0.00452
0.0085	0.03268	-0.03105	0.01608
-0.02568	0.02273	0.00278	0.02698
0.00596	0.00261	-0.00101	0.02036
0.00881	0.00193	0.00058	0.02488
-0.00133	0.02693	-0.00827	0.00309
-0.00666	0.03205	-0.01357	0.01483
-0.01619	0.04076	-0.01059	0.02199
0.00671	0.00814	-0.00832	0.02235
0.0079	0.0301	0.00958	0.00919
-0.01616	0.03399	-0.04108	0.02702
-0.00306	0.01975	0.00446	0.02984
0.0067	0.0205	0.00505	0.05857
-0.01225	0.03835	-0.01452	0.00753
0.02841	0.00144	0.02374	0.01714
0.01335	0.01621	0.01452	0.01146
0.00931	0.00242	0.01108	0.04358
0.01002	0.00294	0.02094	0.01935
-0.01407	0.02486	-0.01512	0.00052
0.01581	0.00215	0.03377	0.01231
0.00538	0.00218	0.02248	0.00974
0.01365	0.01064	0.00089	0.01725
-0.01826	0.00208	0.00209	0.00737
0.01841	0.02804	-0.03426	0.00638
0.02108	0.0129	0.0203	0.00754
-0.00816	0.00981	0.02512	0.01617
-0.00557	8e-05	0.01141	0.01558
0.01604	0.00054	0.036	0.02183
-0.03192	0.01641	-0.00559	0.01441
0.00708	0.02462	-0.04089
0.03514	0.01715	-0.00663	0.0069
		-0.00669	0.03913
		0.02313	0.02995
		-0.00341	0.01681
		-0.01356	0.01817
		-0.04027	0.02339
		0.00353	0.01939
		0.01405	0.00161
-0.00736		0.00317	0.02463
		0.00192	0.01367
		0.00563	0.00808
		0.01519	0.00494
-0.00143	0.01018	0.00103	0.00704
		0.03452	0.01399
		0.0095	0.01254
-0.0257	0.01468	0.00788	0.04328
		0.00497	0.01726
		-0.00472	0.01239
		0.00076	0.01174
		0.01236	0.00051
		0.02152	0.00176
-0.03122	0.00631	-0.00865	0.03062
		-0.01151	0.01346
		0.01089	0.00795
		0.02004	0.00659
0.04559	0.00541	0.01047	0.00505
		0.01041	0.00304
		-0.01089	0.04272
		-0.01494	0.01843
		-0.01554	0.00909
		-0.00885	0.00823
		0.02222	0.02731
		0.01506	0.02788
		0.00179	0.00888
		0.00769	0.0174
		-0.00835	0.02044
		0.00478	0.00106
		0.00738	0.02255
		0.00136	0.01918
-0.0106	0.00269	-0.00943	0.00721
		0.00054	0.02359
		0.03789	0.00943
		0.029	0.05931
-0.01318	0.03054	0.00046	0.00321
		-0.00655	0.00312
		0.00423	0.02036
		-0.02006	0.01107
		0.0169	0.00532
		0.00012	0.0481
		0.01012	0.03999
		0.01833	0.0223
0.03659	0.00667	0.00025	0.01227
		0.00837	0.03361
		0.01496	0.00945
		0.03437	0.031
-0.00657	0.03191	0.00676	0.02637
-0.01795	0.02563	0.00035	0.0027
		0.01726	0.00268
		0.00134	0.00729
		-0.008	0.01735
		-0.01033	0.02646
		-0.00182	0.02456
		-0.00265	0.0206
		0.00151	0.01208
		0.00157	0.02351
0.00677	0.01934	0.01276	0.02663
		-0.01279	0.00076
		-2e-05	0.02657
		0.0098	0.01238
		0.02763	0.01351
-0.00191	0.02137	0.01921	0.00916
		0.02968	0.01913
0.01696	0.00696	-0.0042	0.02073
		0.01902	0.00801
0.0032	0.02802	0.03327	0.02243
		0.02002	0.01672
		-0.02431	0.01457
		0.01002	0.01809
		-0.0154	0.00373
		0.01099	0.02399
		8e-05	0.02103
		0.00465	0.00063
		-0.01298	0.00761
		-0.00289	0.00792
-0.01072	0.00436	0.00041	0.03045
		0.00023	0.02341
0.00012	0.0137	-0.0019	0.03366
0.0046	0.00565	-0.00104	0.02214
-0.00125	0.00416	0.01015	0.02263
0.01074	0.01789	0.01262	0.01822
0.00987	0.03125	0.00977	0.0153
0.05975	0.11509	0.00797	0.02416
0.0116	0.0036	-0.00015	0.01401
0.004	0.00641	-0.00677	0.01718
0.00117	0.01033	0.00154	0.02156
0.00391	0.0093	-0.00031	0.02471
-0.0009	0.02085	-0.02459	0.01697
-0.03783	0.01497	-0.01361	0.00362
		-0.00933	0.01196
		-1e-05	0.02397
		-0.00938	0.01695
		0.00716	0.00466
0.00248	0.02057	0.01931	0.00504
		0.01128	0.02829
		0.00139	0.01434
		-0.01381	0.00881
		0.02152	0.00872
		0.01777	0.01879
		0.00635	0.00567
0.00197	0.05656	-0.00537	0.01774
		-0.0163	0.01714
-0.0091	0.02172	0.00843	0.02135
		0.00376	0.03681
0.00074	0.01095	0.01258	0.00811
0.01645	0.0055	0.01314	0.01487
		-0.0051	0.01437
-0.01907	0.02711	0.00035	0.00081
-0.01832	0.04508	-0.01349	0.01664
0.03047	0.02774	0.03145	0.02598
		0.00672	0.01568
0.03349	0.00224	8e-05	0.01494
-0.00447	0.01557	0.00236	0.02808
		0.02515	0.01356
		0.00374	0.00945
		0.01731	0.00832
		0.00781	0.00668
		0.00988	0.00601
		0.02122	0.00099
		0.02415	0.03192
		-0.00172	0.01004
0.0186	0.00486	-0.00623	0.01428
		-0.00255	0.01038
		0.00661	0.0241
		0.02432	0.034
		-0.01187	0.0083
-0.02256	0.05755	-0.00938	0.01922
		0.01776	0.01906
		-0.01849	0.00278
		-0.01414	0.00039
		0.01893	0.00885
-0.00996	0.02005	0.00272	0.03794
0.00472	0.00466	0.03377	0.04895
0.01179	0.0161	-0.00139	0.01466
0.01927	0.02329	0.03234	0.03207
-0.01521	0.00612	0.00676	0.00224
0.0008	0.00263	0.00104	0.01391
-0.00661	0.0248	0.02465	0.02531
0.01168	0.01696	0.01298	0.01538
0.01293	0.00023	0.01335	0.00893
-0.01527	0.00317	0.02827	0.01467
-0.00862	0.03714	0.01189	0.009
-0.00811	0.00762	0.0184	0.03473
-0.01081	0.01397	-0.00148	0.01889
-0.00352	0.0408	0.0125	0.02505
0.01185	0.01318	0.02031	0.005
0.0225	0.00211	0.00826	0.00868
0.00327	0.02342	0.01138	0.00395
-0.02351	0.00514	0.00198	0.02223
0.00827	0.0142	0.00639	0.00299
-0.00903	0.02262	0.01131	0.01791
-0.01209	0.00872	-0.00433	0.01914
0.00555	0.01442	-0.03033	0.00531
-0.0351	0.02071	0.01188	0.0001
-0.01101	0.02883	-0.01136	0.00455
-0.00708	0.00035	0.01159	0.01202
-0.04039	0.02316	-0.05453	0.00308
-0.00406	0.00872	-0.03621	0.00336
-0.00523	0.00317	0.00863	0.00379
-0.01767	0.04329	-0.0476	0.02156
0.00035	0.00646	-0.01028	0.02622
-0.00225	0.0288	0.018	0.01199
-0.02687	0.0066	0.01323	0.02557
-0.00795	0.02553	-0.0153	0.0235
-0.00529	0.0033	0.02032	0.00038
0.00185	0.0275	0.02035	0.01225
0.00357	0.02026	0.02948	0.02507
0.00261	0.02359	0.00072	0.02232
-0.02067	0.0052	0.01162	0.00013
0.01082	0.01244	0.00154	0.00867
0.00373	0.01067	-0.00791	0.01744
0.00364	0.02432	-0.00167	0.01529
-0.01411	0.00563	0.0482	0.00585
-0.02589	0.0166	0.02077	0.00666
-0.02003	0.00439	-0.00531	0.01455
-0.01063	0.00283	0.02962	0.01569
-0.01724	0.00247	0.04003	0.01307
0.01267	0.03906	0.01041	0.01297
-0.01512	0.06049	0.00798	0.00595
-0.00854	0.02224	-0.04068	0.0056
0.01282	0.00263	0.0366	0.00202
-0.00844	0.00235	0.01368	0.00225
0.0242	0.01381	0.02482	0.00533
0.00976		0.02702	0.00639
0.00664	0.01637	0.00251	0.00858
0.0069	0.03052	-0.00072	0.0148
0.01464	0.00077	0.01918	0.0211
0.00986	0.02107	0.0275	0.01024
-0.00317	0.0324	0.00878	0.00556
0.00443	0.04074	0.01048	0.02268
-0.00113	0.01874	0.00676	0.00835
-0.02597		0.00676	0.01783
-0.01343	0.01495	-0.01404	0.00392
0.01289	0.02858	0.00886	0.02501
-0.00496	0.05184	0.00039	0.00668
0.00957	0.00727	0.01263	0.01567
0.00463	0.03679	0.0231	0.02499
0.05185	0.00343	0.02181	0.00252
0.01492	0.00147	0.02081	0.01506
0.00463	0.00434
0.00142	0.02551	-0.00507	0.043
0.0149	0.00741	0.0339	0.01176
0.01796	0.00634	0.01249	0.00481
-0.0061	0.00837
0.01384	0.01413	0.01989	0.0454
-0.00952	0.02734	-0.00559	0.02841
0.03949	0.02281	0.05888	0.02463
-0.00631	0.00168	0.02403	0.01928
0.01753	0.04009	0.02251	0.05489
-0.02635	0.02768	-0.01621
-0.00976	0.02508	-0.00135	0.0069
0.0062	0.02666	0.00673	0.01386
0.00427	0.03189	0.01626	0.02317
0.00574	0.00016	-0.01257	0.03647
0.00254	0.03541	0.00903	0.02226
-0.00917	0.00677	0.0182	0.00291
0.02631	0.02802	0.02196	0.02851
0.00235	0.00804	0.04086
-0.03799		0.0026	0.0018
-0.0029	0.00813	0.03466
-0.00438	0.02406	0.0345	0.01781
0.03363	0.00847	0.03998	0.01516
-0.00287	0.00676	0.00149	0.01292
-0.00124	0.02487	-0.00318	0.01048
0.0014	0.02074	0.01815	0.00464
-0.02	0.01469	0.00952
-0.0008	0.02007	-0.00648	0.01128
0.04175	0.03369	0.05523
0.01066	0.01106	0.01433
-0.00885	0.03584	0.00697	0.02129
0.04832	0.0392	0.02139
0.01509	0.05869	0.00569
0.01088	0.01259	0.0089	0.03229
-0.01151	0.01898	-0.00493	0.00565
0.01545	0.01811	0.01284	0.01265
-0.01278	0.01678	-0.01186	0.01701
0.0262	0.00747	-0.01095	0.00778
-0.00469	0.03253	0.00703	0.0176
-0.00122	0.01492	0.02188
-0.00421	0.03477	-0.01111	0.02076
-0.00176	0.02275	0.00166	0.0027
-0.01233	0.0388	0.0147	0.01179
0.00669	0.04312	0.03266	0.00469
-0.00442	0.00162	0.00221	0.03049
-0.01673	0.00238	-0.00997	0.02525
0.00926	0.0119	0.00115	0.0045
-0.01109	0.03158	0.01871
0.02222	0.02029	0.02569	0.0015
0.03458	0.00047	0.00915	0.00653
-0.00999	0.01222	-0.00876	0.02377
-0.01316	0.00524	-0.00816	0.01381
0.0052	0.03946	0.02944	0.01618
0.02314	0.00344	0.00106	0.00951
0.02145	0.01484	0.0357	0.02108
-0.00546	0.03661	0.00911	0.00262
-0.02661	0.00675	0.00413	0.02013
-0.00539	0.05141	0.00764	0.02859
0.00095	0.00977	-0.00208
0.02791	0.03348	0.04015	0.01686
0.01225	0.02775	0.04287	0.00428
-0.01181	0.01049
0.04052	0.01357	0.04547	0.00187
0.02077	0.0052	0.01614	0.012
-0.00388	0.0244	0.03586	0.00598
0.04013	0.00233	0.06068	0.02456
-0.00817	0.01131	0.00765	0.01917
0.01738	0.01564	0.01397	0.01626
0.02397	0.00451	0.01467	0.02841
		-0.00939	0.03168
0.00487	0.01618	-0.01501	0.02429
0.00639	0.01813	-0.00159	0.02614
-0.00519		-0.00396	0.02604
		0.00746	0.00569
0.00184	0.00643	0.01361	0.01001
		0.00207	0.01037
0.02652		0.01738	0.01278
0.00104	0.01728	-0.00117	0.00114
-0.00963		0.00833	0.02558
0.00414	0.00742	-0.01124	0.01335
-0.04893		-0.00583	0.03352
-0.04455		0.0216	0.00046
0.00047	0.04285	-0.00912	0.00627
0.01236		-0.01282	0.00487
-0.01213	0.00949	0.00168	0.03098
		-0.01823	0.01636
0.0115		0.04305	0.00048
0.01657	0.01864	0.02446	0.02731
-0.02687	0.01898	-0.01847	0.03306
0.00055		0.00935	0.00548
0.04369		-0.01103	0.0005
-0.00116	0.04698	0.00467	0.02291
0.02878	0.04131	0.03774	0.0059
		0.0016	0.01061
		0.00942	0.01596
-0.01501		0.00109	0.00574
-0.01406	0.05921	-0.00265	0.03279
0.00825	0.02085	0.00144	0.01817
0.00482		-0.00032	0.00417
-0.01307	0.03633	0.00374	0.01974
-0.01776	0.01283	-0.02181
-6e-05	0.01783	0.00375	0.01419
0.02339		-0.02439	0.00973
		0.00505	0.02206
-0.03013	0.01236	-0.02023	0.00291
		0.00432	0.00071
0.01203		-0.01194	0.01414
-0.03133	0.01691	-0.01462	0.00436
-0.01332	0.00041	0.00074	0.01808
0.01458		0.01764	0.02248
-0.01761	0.03093	-0.00073	0.01128
-0.00316	0.02293	0.00191	0.00255
0.00189	0.02501	-0.0007	0.02383
-0.01548		-0.00801	0.03524
-0.0024	0.01781	0.00268	0.00597
-0.01397		0.0145	0.00194
0.00645	0.01027	0.0008	0.00106
0.00875	0.01547
-0.00779	0.01767	-0.00181	0.00086
		0.00022	0.04025
		-0.00217	0.00035
-0.0237	0.00661	-0.02251	0.01706
-0.00226	0.0334	0.0002	0.01876
0.00814		-0.00451	0.02111
0.00746		-0.01281	0.02913
0.00144	0.02626	0.00552	0.01343
-0.00227	0.0155	-0.00974	0.01405
-0.00358	0.0149	0.02238	0.01113
0.0167	0.01784	-0.00928	0.01391
-0.01674		-0.00342	0.0049
-0.02133		0.00556	0.00368
-0.03158	0.02393	-0.00105	0.00479
		-0.01773	0.01053
		-0.01258	0.00305
0.00981	0.02237	-0.00645	0.02723
-0.0055	0.00162	-0.00388	0.01541
8e-05	0.02114	0.00724	0.01301
-0.00169	0.00827	-0.00578	0.01535
0.00333		0.00136	0.02121
-0.00727	0.02711	-0.00426	0.0235
-0.00992	0.01461	0.02073	0.00023
0.00365		0.01472	0.02456
-0.02572	0.01413	0.00456	0.03888
-0.02156	0.00472	0.02071	0.00905
-0.01563	0.02231	0.03339	0.00572
0.0043	0.01681	0.00318	0.04804
-0.01603	0.01764	0.00884	0.01582
0.00087	0.02135	-0.00218	0.00152
0.01179	0.00796	0.01971	0.0173
0.00022	0.00057	0.03608	0.02549
0.00256	0.00561	0.03558	0.01237
-0.02482	0.01077	0.0016	0.01231
0.01452	0.01283	-0.01244	0.01585
0.00678	0.00066	-0.01055	0.01089
0.01254	0.02705	0.00637	0.01053
-0.02171	0.0178	-0.00027	0.01321
0.00311	0.0031	0.01263
-0.00024	0.03079	0.01186	0.03587
0.00585	0.00229	0.00596	0.01452
0.00474	0.02182	-0.01162	0.01208
0.00762	0.00529	0.02566	0.0345
-0.01268	0.0288	0.00895	0.02591
-0.02169	0.00164	0.00114	0.01548
0.01087	0.00676	0.03145	0.00304
0.02708	0.02323	0.01408	0.02669
0.00727	0.00762	0.03592	0.00073
0.00181	0.02917	-0.01746	0.00466
0.01612	0.01644	0.00805	0.00431
-0.01288	0.04109	0.00275	0.04919
0.00857	0.00276	-0.02355	0.00374
-0.01298	0.00209	0.03247	0.00251
0.01612	0.01467	-0.00027	0.01171
0.00422	0.01594	0.03076	0.0256
0.01739	0.01282	0.01421	0.0271
0.01285	0.00849	-0.01942	0.03027
-0.02041	0.00268	0.02095	0.00492
0.0015	0.02436	-0.00318	0.02301
0.00477	0.02688	0.01642	0.02573
-0.00937	0.00488	0.01207	0.00363
0.00632	0.01618	0.00743	0.01122
-0.01862		0.00032	0.01877
-0.01238	0.02527	-0.0021	0.00025
-0.02393		-0.00396	0.01791
-0.00325	0.01402	0.00879	0.0209
0.0056		0.0002
0.00039		0.00186	0.01455
-0.0158	0.01132	0.00126	0.00242
-0.02207	0.00663	-0.00058	0.02202
0.00662	0.01929	-0.01727	0.04942
-0.00691		-0.00634	0.01236
		-0.00277	0.02141
		-0.01548	0.02117
-0.01724		-0.02361
-0.00464	0.02038	0.01166	0.00816
-0.02223	0.00313	0.00955	0.01249
		0.00224	0.02181
0.02266		-0.00191	0.00813
		-0.00207	0.00325
-0.00582		0.00716	0.01583
-0.02672	0.02216	-0.00673	0.01898
-0.00661	0.02605	-0.0105	0.03601
0.00586	0.01028	0.01885	0.03201
-0.03142	0.01437	0.01763	0.01981
0.00076	0.01805	-0.00077	0.01048
0.0015	0.00487	0.02267	0.01556
		0.00437	0.00403
0.00718	0.02599	-0.00777	0.01017
0.01401		0.01614	0.01599
-0.00243	0.02892	-0.01477	0.00624
0.02545	0.04066	0.01193	0.04823
0.00185		-0.00919	0.00834
0.01089		-0.02821	0.00999
-0.00315		0.01277	0.00782
		-0.00705	0.00748
0.00169	0.03482	-0.02852	0.01081
0.00771	0.01652	0.00788	0.01549
0.02116	0.02601	-0.00335	0.00648
0.00808	0.03789	-0.03187	0.00862
-0.00079	0.03394	0.0132	0.00961
0.00907	0.0163	-0.00633	0.02762
-0.0086	0.02365	-0.02934	0.00726
-0.00856	0.00295	0.01093	0.01822
-0.01142	0.02354	0.02176	0.00557
-0.00164	0.02028	0.01479	0.00928
0.00574	0.02153	0.00289
0.01008	0.03435	-0.00357	0
0.00486	0.01253	-0.01537	0.0072
0.01038	0.01898	0.00447	0.002
0.09599	0.09998	0.01486	0.02224
-0.00672	0.02203	-0.00192	0.01295
-0.02724	0.01435	0.00184	0.03603
-0.00358	0.02713	-0.0088	0.01596
-0.02452	0.01545	-0.03225	0.04396
0.0149	0.00053	-0.05954
-0.00432	0.01744	-0.0155	0.00875
0.01502	0.0196	-0.01394	0.01881
0.00087	0.02214	-0.02168	0.03378
-0.01476	0.01848	-0.02252	0.02825
0.00272	0.01807	0.00769	0.01857
0.00196	0.00869	-0.01041	0.00513
0.00198	0.00682	-0.0092	0.01787
0.00239	0.02912	-0.0117	0.00964
-0.00355	0.03133	-0.03161	0.01133
-0.00626	0.00891	-0.02321	0.01938
0.01177	0.04561	0.01215	0.00219
0.00575	0.01994	-0.0097	0.01526
0.02266	0.06037	0.03227	0.00531
0.00196	0.01273	0.04483
-0.02421	0.00163	-0.01042
0.0114	0.01724	0.00217	0.00517
0.01684	0.02688	0.0099	0.03472
0.03121	0.01733	-0.02298	0.01445
-0.0141	0.03125	-0.0004	0.00579
0.00404	0.02178	-0.01195	0.02783
-0.01022	0.00138	-0.02128	0.01145
-0.01417	0.02404	-0.00722	0.01604
0.01487	0.02417	0.00425	0.02964
-0.00676	0.02192	-0.05229
-0.00776	0.02829	-0.02506
-0.00751	0.0363	-0.0183
-0.01428	0.00056
0.00585	0.02907	-0.02334	0.03078
0.02365	0.0116	0.03995	0.01732
0.00293	0.02452	0.0041	0.01455
-0.00609	0.02666	-0.01115	0.00194
-0.01022	0.02059	-0.0177	0.03618
-0.00527	0.02045	-0.00385	0.02372
0.01043	0.00271	0.00581	0.02297
0.00742	0.02348	0.00551	0.01259
0.01409	0.01123	-0.00639	2e-05
-0.01824		-0.00494	0.00271
0.03369	0.01793	0.00116
-0.03976		0.00133	0.0233
0.01645	0.01409	0.01896	0.0123
-0.01209	0.02376	-0.00124	0.01718
-0.01954	0.02301	0.00472	0.00702
-0.00205	0.00258	0.00348
0.01597	0.00347	0.004	0.00676
-0.00047	0.03041	0.02329	0.00483
0.00431	0.00796	0.02501
-0.00269	0.00114	-0.01933	0.01535
0.01153	0.01857	0.0015	0.00236
0.04567	0.02474	0.00146	0.00799
-0.00204	0.00588	-0.01174	0.03976
0.00665	0.01822	0.00244	0.01211
0.01527	0.00988	0.00056	0.02746
-0.02316	0.00996	0.01216	0.02453
0.00419	0.00039	0.01447	0.02883
0.02691	0.02278	0.03652
0.0176	0.0162	-0.00272	0.02959
-0.01043	0.01308	0.0121	0.02461
-0.00801	0.02061	-0.02415	0.02706
-0.00013	0.00421	-0.00482	0.02896
0.00155	0.0304	-0.00647	0.04751
0.01667	0.01631	-0.01599
0.02792	0.02761	-0.00216	0.01528
0.01922	0.01845	0.01363
0.0076	0.03065	0.0032	0.02773
0.04362	0.00117	0.02075	0.0004
0.0311	0.0291	0.01672	0.00214
-0.01777	0.00317	0.00834
0.00595	0.01097	0.01076	0.04221
-0.04822	0.0527	0.0087
0.03743	0.01255	-0.02202
0.00276	0.01802	-0.01076	0.02213
0.02419	0.03013
0.0072	0.03946	-0.01982
0.01354	0.03176	-0.0315
-0.0097	0.00504	-0.0048	0.03632
0.01221	0.00893	-0.01252
0.00497	0.01068	-0.00723	0.0034
0.04724	0.01036	0.0065	0.0133
-0.01972	0.02027	-0.0081
-0.00783	0.01131	0.01049	0.02412
-0.04224	0.01649	-0.0424	0.00103
-0.00233	1e-05	0.01133	0.02284
0.02174	0.01114	0.00532
-0.00034	0.01212	0.00239	0.0099
-0.00687	0.02481	0.00159	0.01816
0.01461	0.01927	0.01329	0.02453
-0.00922	0.01589	-0.00089	0.00379
-0.01085	0.00107	-0.0245	0.00502
0.00769	0.01452	0.00095
0.00293	0.02216	0.00228	0.01442
-0.02198	0.00747	-0.00096
0.0494	0.00401	0.01085	0.01085
0.01651	0.05403	0.00402	0.0083
-0.01039	0.02212	0.02877	0.00486
0.01118	0.03315	0.00115	0.00729
0.01817	0.01507	0.02847	0.00381
0.0173	7e-05	-0.00331	0.00808
-0.00511	0.03834	0.00041	0.00119
0.01099	0.00645	-0.00685
0.01723	0.03167	-0.01084	0.00269
0.00061	0.02228	0.00157	0.00494
0.00171	0.01993	0.01354	0.02264
0.00751	0.02928	0.00179	0.00799
-0.00692	0.02818	-0.01695	0.01698
0.01279	0.00242	0.04
0.01729	0.0495
		-0.02107	0.00563
-0.00975	0.03405	0.02356	0.00681
0.00684	0.04526	-0.00028	0.01704
-0.00938	0.02341	-0.00131	0.01042
0.00066	0.019	-0.0082	0.02776
-0.00154	0.01062	-0.02811
0.02097	0.02014	-0.05881	0.03821
-0.00401	0.01095	-0.00923
0.01648	0.03555	0.01747	0.00922
0.00685	0.00676	0.01293
0.00212	0.036	0.03405
-0.02327	0.02887	-0.02021	0.03055
0.01478	0.00288	0.00645	0.03492
0.00171	0.02203	0.04183	0.02457
-0.0305	0.03106	0.01629	0.01619
0.00545	0.01523	0.01713	0.02341
-0.02735	0.01903	0.0495
0.0098	0.01083	0.02758
-0.00263	0.03136	0.04139
0.02001	0.0307	0.03049	0.02835
0.00143	0.02033	-0.00287	0.02589
0.00623	0.00999	0.00652	0.01514
-0.01925	0.00874	-0.00046	0.02208
0.01121	0.0206	0.01767	0.02119
0.00288	0.03309	0.00557	0.00272
-0.01236	0.02339	0.00588
-0.01793	0.00388	-0.0084
0.0038	0.02345	0.03674	0.01129
0.01838	0.02195	0.02174	0.02967
0.03547	0.01749	0.01129	0.02204
-0.01975	0.01883	0.02016
-0.0095	0.01431	-0.01465	0.04337
0.01101	0.00407	0.01781	0.01987
0.01206	0.01349	0.01012	0.00021
0.00321	0.02144	0.0148	0.00828
0.00023	0.02602	-0.01137	0.02358
-0.01761	0.02375	0.00318	0.02985
-0.01139	0.02513
0.00989	0.03378	0.02723	0.02
-0.02543	0.01471	0.02136
0.00568	0.01995	-0.0131	0.01309
0.0026	0.02769	0.01504	0.00391
0.01072	0.01953	0.04502	0.00741
0.01194	0.02247	-0.00065	0.02615
0.01932	0.04225	0.0151	0.01599
0.03298	0.01552	0.03268	0.00461
-0.01244	0.03576	-0.01702
-0.00553	0.01536	0.01805
0.00919	0.01417	0.02281	0.01829
-0.0105	0.0148	0.00822	0.01834
-0.01595	0.02113	0.01153	0.01973
0.00612	0.00955	0.00211	0.02468
-0.00458	0.00461	-0.00225	0.03288
0.02462	0.02572	0.0178	0.01871
-0.00755	0.04442	0.0185
-0.01211	0.03111	0.02885
-0.01045	0.0316	-0.01128	0.05256
0.01875	0.01091	-0.00328	0.01495
0.01378	0.00567	0.01936	0.01175
0.00176	0.01552	-0.01368
0.01155	0.00587	0.04661	0.02861
-0.00233	0.01806	0.01003
0.00755	0.01443	0.00508	0.00802
0.01385	0.01087	0.01151
0.01118	0.03185	0.01835	0.02917
0.02319	0.03068	0.004
-0.00159	0.00594	0.00132	0.03686
-0.03369	0.01068	0.01256	0.02106
-0.00419	0.01235	-0.02363	0.04912
-0.02168	0.00052	-0.00885
-0.02547	0.02094	0.0176
0.00384	0.01944	-0.04956	0.01399
-0.02952	0.01227	-0.01603	0.00329
0.00037	0.00882	0.00915	0.02767
0.00152	0.03248	-0.02869	0.02641
0.00013	0.02119	0.00572	0.02394
0.0123	0.00716	0.03939
0.02142	0.02861	-0.01498	0.03634
0.00907	0.01224	-0.0356	0.0302
-0.00274	0.01949	0.01219	0.00998
0.00186	0.00629	-0.02526	0.01199
0.01248	0.01451	-0.01214	0.00225
-0.01487	0.0329	-0.00209	0.02503
-0.02453		-0.0285	0.00148
0.01523	0.01407	-0.00232	0.00699
-0.00752	0.00224	-0.00312	0.00991
0.00103	0.01052	-0.02563	0.0274
-0.0044	0.01253	-0.01304	0.02091
0.00199	0.01183	0.00126	0.04871
0.03027	0.02546	0.03509
0.00903	0.03667	-0.02058	0.00634
0.02439	0.02595	0.00405
-0.02255	0.00914	-0.00545
0.01022	0.02804	-0.03882
0.00983	0.00933	-0.02725
0.00489	0.04232	-0.00316	0.00782
-0.00052	0.01831	-0.03369
0.02923	0.00329	-0.0241	0.02467
0.01241	0.0009	0.01595
0.00669	0.02245	-0.03782
-0.00739	0.01256	0.01103	0.01361
-0.01831	0.01383	-0.02495	0.00254
-0.00654	0.02232	0.00246	0.02323
0.00164	0.03327	0.00893	0.04198
0.01425	0.03694	0.0062	0.00413
-0.02923	0.02742	-0.0206	0.02682
0.00838	0.01291	-0.01356	0.02544
0.00303	0.02473	-0.00017	0.02019
-0.01586	0.00249	-0.00704	0.01422
0.00439	0.00831	-0.02911	0.02299
0.00386	0.00651	0.03735	0.03181
-0.01333	0.01301	-0.00221	0.01631
0.02141	0.0349	-0.01623	0.0241
0.02233	0.00612	0.01373	0.00945
0.00987	0.03077	-0.0098	0.01039
-0.00153	0.01494
0.02822	0.03559	-0.01844
-0.01348	0.01348	0.00347	0.00917
0.0192	0.02181	0.00501	0.00879
-0.02891	0.01208	-0.05179	0.01316
0.00769	0.02232	-0.00933	0.02773
-0.00431	0.01711	-0.01183	0.01035
-0.00986	0.01727	-0.00951	0.03567
0.02395	0.00312	-0.00878	0.02084
0.03363	0.02481	0.00536	0.03277
-0.0011	0.00752
0.00372	0.05417	-0.01632
-0.00494	0.0272	-0.03797	0.02949
-0.0091	0.01427	-0.0132	0.02466
0.01485	0.00429	0.01645	0.0198
-0.00761	0.0059	-0.02142	0.0191
0.00754	0.00601	-0.02902	0.01493
-0.00984	0.0064	-0.01197
0.01788	0.01231	-0.01339	0.03032
-0.00793	0.02666	-0.00789
-0.03063	0.01287	-0.03851
0.03764	0.01081	0.00857	0.01795
0.01445	0.00371	-0.00125
0.01669	0.01094	0.01005	0.0098
-0.00954	0.02632	-0.01032	0.01659
0.00058	0.03004	-0.02025
-0.00507	0.00265	0.00376	0.01349
0.02415	0.02425	0.00922	0.01288
0.03064	0.03488	0.00803	0.01037
-0.01515	0.0091	0.01273
-0.0278	0.01472	-0.00507	0.01894
-0.00384	0.02913	0.01705	0.0307
-0.01713	0.0489	-0.00972	0.00468
0.00055	0.00242	-0.01847	0.01335
-0.00295	0.02307	0.01024	0.01547
0.01001	0.00926	-0.02403
-0.0071	0.00054	0.00343	0.01474
0.00558	0.01704	-0.01188	0.01771
-0.00826	0.02069	-0.00305	0.03438
0.02999	0.01181	-0.02685	0.01913
0.02434	0.02957	0.02329	0.04021
0.00769	0.01005	-0.00578	0.02767
0.01233	0.02492	-0.01655	0.00681
-0.00649	0.02608	-0.01928	0.00878
0.00209	0.00564	0.00079
-0.01195	0.01281	0.02958
0.0059	0.03627	-0.02214	0.00829
-0.00179	0.01257	0.00135	0.01605
0.0019	0.03613
-0.00378	0.02371	-0.01077	0.03256
-0.02128	0.0398	0.01268
-0.00881	0.00897	-0.01929	0.02121
-0.01658	0.00098	0.00388	0.01215
-0.00038	0.01672	-0.01808	0.00463
-0.01685	0.02014
-0.02218	0.03261	-0.02912
0.00774	0.00432	-0.00551	0.03425
0.00631	0.01615	-0.03103	0.001
0.00909	0.01612	-0.02154	0.00136
-0.00101	0.02853	0.00287
-0.00692	0.01747	-0.0323	0.03772
-0.00218	0.0294	0.00265	0.03033
-0.0019	0.00265	-0.004	0.01452
-0.00805	0.00139	-0.03263	0.00886
-0.01374	0.00519	-0.0089	0.00821
-0.00057	0.01236	-0.01701	0.01592
-0.00175	0.02104	-0.00511	0.01267
0.02221	0.00733	0.02723
0.00494	0.05482	0.00514
-0.00489	0.00726	-0.02113
0.00234	0.01589	-0.01256	0.02685
-0.00537	0.00407	-0.01115	0.00639
-0.00792	0.03078	-0.00675	0.02954
-0.0267	0.00633	-0.02166	0.00874
0.01314	0.01137	0.0027	0.02041
0.03786	0.01629	0.02748	0.00697
0.00681	0.00833	-0.00812
0.00057	0.00105
-0.0076	0.01481	0.00475
-0.00584	0.00427	-0.01118	0.03729
0.02542	0.03877	0.00455	0.00989
0.05322	0.01525	-0.01512	0.00329
-0.00537	0.01453	0.00093
0.01674	0.01146	0.01149	0.01354
0.00861	0.00262	-0.00273	0.00287
-0.00079	0.00845	-0.01703
0.02198	0.00552	0.00786
-0.01005	0.00811	-0.00371	0.02667
-0.01538	0.00746	-0.00928
0.01087	0.02159	0.0022
0.01999	0.01324	0.0223	0.00331
0.00364	0.03054	0.02002	0.03
-0.01947	0.03618	-0.01011	0.00707
0.01116	0.017	-0.00885	0.00887
-0.00571	0.0127	0.00029	0.01714
0.00403	0.00392	-0.02667	0.02169
-0.03797	0.01462	-0.00057
0.01096	0.00381	0.00756	0.00457
0.01796	0.03245	0.01243
-0.01428	0.02729	0.00676	0.02243
-0.00421	0.01014	-0.01279	0.03112
0.00319	0.02694	0.01325	0.00389
0.02067	0.04742	0.00395	0.00195
0.03169	0.01491	-0.01554	0.01099
-0.007	0.02297	-0.00677
-0.02335	0.03337	-0.01247	0.03465
0.00995	0.00788	0.01687
0.01945	0.01653
0.00292	0.01002	0.00315	0.01422
1e-05	0.01118	-0.02724	0.01705
0.02718	0.02355	0.00091	0.0021
0.00054	0.05488	-0.01639
-0.00772	0.0277	0.00735	0.02309
-0.02695	0.01777	-0.02392	0.01125
-0.016	0.0139	0.02495
-0.02064		0.0045	0.01524
0.00949	0.01261	-0.01883	0.0153
0.00387	0.00517	0.00072
-0.00946	0.01289	-0.03244	0.00179
0.00979	0.03961	0.0041	0.00036
-0.00154	0.02934	-0.00898	0.01828
-0.00956	0.01397	0.00053	0.01181
0.01008	0.02679	-0.00535	0.00399
-0.02508	0.01228
-0.0063	0.00383	0.01658	0.0288
0.00649	0.01769	0.00729	0.0298
0.03763	0.02739	-0.00837	0.02291
0.00823	0.03355	0.01015
0.00339	0.00808	0.02104	0.00292
-0.05768	0.0192	-0.0322	0.00061
-0.00779	0.00825	-0.01028	0.02258
-0.00533	0.01787	0.00408	0.01406
-0.03892	0.01588	-0.06363
-0.00671	0.01723	-0.01612	0.0183
0.00747	0.02998	0.00154	0.00933
0.00239	0.0197	0.00942	0.02185
-0.01513	0.01993	0.01776	0.00413
-0.00176	0.01128	0.00279	0.02094
-0.00942	0.00695	-0.05677
-0.00171	0.01989	-0.01049	0.00879
-0.02425	0.00757	-0.00974
-0.03468	0.014	-0.01854
0.00099	0.01584	0.01376	0.02683
-0.03994	0.00167	-0.01967	0.04951
0.0396	0.01634	0.01908	0.01353
9e-05	0.01103	-0.01041
0.02875	0.01599	0.00795	0.00452
-0.00956		0.01686	0.01061
0.00665	0.02744	0.01751	0.02253
-0.02915	0.00176	0.02438	0.02653
0.00592	0.03793	0.00492	0.0019
0.00614	0.00452	-0.02337	0.01968
0.031	0.01182	0.02528
-0.01085	0.00106	-0.02319	0.02203
0.00432	0.01096	-0.03162
-0.02563	0.02101	-0.03225	0.01074
0.02558	0.02593
0.0059	0.01353	-0.02321	0.034
-0.04837	0.00011	-0.04707
-0.0066	0.02183	-0.01605	0.00344
0.00661	0.02021	0.02509	0.00385
-0.02324	0.00578	-0.01773	0.01475
-0.06861	0.0087	0.01806	0.01758
0.01056	0.01727	-0.0019	0.04354
-0.03144	0.01614	-0.02352	0.06922
-0.01929	0.0097	-0.03545	0.02962
-0.01066	0.00636	-0.01534	0.04689
-0.02732	0.04592	-0.06859
-0.00176	0.03335	0.00428	0.01451
0.00194	0.01512	-0.01245	0.00976
0.0051	0.00648
0.00226	0.00812	-0.01086	0.02196
-0.00201	0.00302	-0.03326	0.02952
0.00948	0.01697	-0.03771	0.00079
-0.01658	0.02411	0.00107	0.02901
0.00477	0.02226	-0.03732	0.03595
-0.00603	0.03729	-0.01593
0.0162	0.00848	0.00933	0.00436
0.0033	0.04372	-0.01955	0.03864
0.02438	0.01254	-0.00182
0.00837	0.00497	-0.024	0.00429
0.02967	0.0329	0.02637
0.01956	0.01522	-0.0045	0.00814
-0.01439	0.02359	0.01033	0.00607
0.0201	0.03367	0.00945	0.00482
0.03172	0.06181	-0.01441
0.01253	0.00838	0.0164	0.02686
0.02566	0.02651	0.02688	0.02329
0.00205	0.02722	0.0027	0.01463
-0.01081	0.05085	0.00169	0.00201
-0.00126	0.01118	0.00988
0.01028	0.00126	-0.00136	0.02495
-0.01231	0.02044	0.00136	0.02034
-0.00789	0.0154	-0.02372	0.02804
-9e-05	0.00992	-0.05873	0.03313
-0.01935	0.00407	-0.02307
0.00437	0.03305	-0.00618
-0.02746	0.01246	0.00019	0.01596
-0.00847	0.00104	0.00418	0.00794
-0.00803	0.01197	-0.0164	0.00381
-0.03778	0.03013	-0.00764	0.02191
-0.0509	0.00269	0.03332	0.03748
-0.02849	0.00851	-0.03237	0.0083
0.00815	0.01501	0.0318	0.00196
0.01131	0.02432	-0.03625
0.01596	0.0059	-0.00012	0.01999
0.00585	0.02971	0.01163	0.01744
-0.00423	0.03018	-0.01711	0.00793
-0.00799	0.00167	-0.03704	0.0335
-0.00945	0.01424	-0.01805	0.01891
-0.00036	0.00464	-0.05688	0.01105
-0.00773	0.00081	-0.03024	0.03032
-0.02222	0.01439	-0.01578	0.00521
0.01727	0.0141	-0.00018	0.00418
-0.00174	0.02049	-0.00433
-0.01167	0.00084	-0.01324
-0.0125	0.01323	-0.0119	0.00963
0.00434	0.01379	-0.01452	0.01631
-0.02319	0.00329	-0.05233	0.02606
0.00729	0.00313
0.00611	0.00932	0.0002	0.00234
0.00745	0.00022	0.00418
0.0009	0.02114	0.01501	0.0121
-0.00911	0.01738	-0.02533	0.00103
-0.01239	0.00251	-0.03429
0.00342	0.00665	-0.02273	0.00297
0.00635	0.00763	0.00731	0.0242
0.00822	0.01307	-0.04659
-0.01325	0.01065	-0.02863	0.01113
-0.00755	0.00794	-0.00089	0.01132
0.00949	0.02572
-0.00169	0.00512	-0.03533	0.01336
-0.00022	0.02811	-0.01842	0.01879
-0.01364	0.01558	-0.01816	0.02933
-0.01185	0.02562	-0.02299	0.01288
-0.00249	0.00735	-0.02617
0.01686	0.03597	0.00789
0.00306	0.01248	-0.00012	0.0118
0.00216	0.00945	0.0144	0.04055
0.03542	0.00388	0.01328	0.00523
0.01349	0.01271	-0.00058	0.02182
0.01562	0.00912	-0.01704	0.01562
0.00438	0.00033	-0.03099	0.01163
0.00128	0.01993	-0.02532	0.00296
0.00307	0.00869	-0.01047	0.02624
-0.0104	0.00841	-0.03497	0.01139
0.00074	0.01592	-0.06683
-0.00352	0.00429	-0.04437	0.04786
0.00051	0.01447	-0.0301	0.03522
0.00467	0.01153	-0.03406	0.00212
0.02928	0.0019	-0.00756
-0.00308	0.00428	-0.0211	0.00383
-0.00012	0.01331	-0.02802	0.01235
-0.00846	0.00137	-0.02733	0.04602
0.00451	0.00165
-0.00946	0.00866	-0.02643
-0.02084	0.00952	-0.03366	0.04059
0.00574	0.01286	0.00564	0.0288
-0.01639	0.01663	-0.00129
-0.02186	0.00902	0.01658	0.01262
-0.0189	0.00153	-0.01901	0.01598
-0.01927	0.04497	-0.01241	0.00943
0.00613	0.02413	0.00914
-0.02336	0.00482	-0.0262	0.03323
-0.00908	0.01819	-0.0086	0.00261
-0.01318	0.01499	0.01644	0.02603
-0.00131	0.01963	-0.02218
-0.01969	0.00938	-0.02767
-0.01783	0.01755	-0.00877	0.00523
-0.01766	0.01724	-0.02897	0.02182
0.00126	0.04431	-0.04293
0.00855	0.02478	0.00955
0.00473	0.00472	-0.02788
0.01741	0.01745	-0.00966
-0.00352	0.01392	-0.0152	0.05662
0.00371	0.01782	0.00908	0.02821
0.01193	0.01724	-0.01943
0.01004	0.03823	-0.03501	0.00886
-0.02504	0.00833	-0.01771	0.01844
0.00557	0.0167	0.00877	0.01303
0.00449	0.00402	0.00686	0.01808
0.01624	0.02745	0.01854	0.02705
0.0017	0.02028	0.03393	0.00941
0.03268	0.01844	-0.01372	0.03121
0.00424	0.01365	0.01926	0.05306
-0.02224	0.01153	0.01177	0.00767
0.00186	0.01143	0.01465	0.00539
0.02862	0.00186	0.03977	0.04426
0.0161	0.01467	0.00255	0.02803
-0.00432	0.05169	-0.00771	0.03033
-0.00903	0.0425	0.00413	0.03334
0.01705	0.0347	0.03695	0.00531
0.00533	0.00998	0.03106	0.00809
0.0307	0.01154	0.02073	0.02251
-0.01819		-0.01755	0.00405
0.03035	0.02427	0.04064	0.00695
0.01919	0.0146	-0.00721	0.00315
0.03204	0.02804	0.0268	0.03646
0.01606	0.03065	0.03563	0.02599
0.02683	0.01697	0.01208	0.01506
0.01612	0.03759	0.00598	0.01866
0.01891	0.00768	0.0004
-0.0066	0.02794	-0.01757	0.01859
0.01818	0.00351	0.02599	0.017
0.00857	0.00534	0.01069	0.01442
0.01562	0.01482	0.01043	0.00132
0.02651	0.03414	0.02682	0.00389
0.05955	0.03311	0.02303	0.01496
0.0114	0.00881	0.00252	0.02498
0.01858	0.04058	0.02194
0.02645	0.02882	0.01217	0.00138
0.00499	0.00821	0.03279	0.0025
0.00729	0.00839	0.00542	0.00598
-0.01218	0.01783	0.0101	0.01578
-0.00554	0.00039	0.02243
-0.01707	0.00343	-0.00962	0.00917
0.00203	0.00469	0.02844	0.01051
0.02071	0.01031	-0.00011	0.01313
0.00126	0.01761	0.03643	0.02618
0.01024	0.00904	0.01486
0.02022	0.023	0.03712	0.02361
0.00218	0.0062	0.02974	0.03035
0.003	0.03282	0.02823	0.02944
0.00764	0.01371	0.01716	0.0204
0.01061	0.0069	0.00407	0.0121
0.00308	0.02308	0.03062	0.02617
0.02725	0.00401	0.03369	0.01253
-0.00909	0.02295	0.02153	0.00775
0.02815	0.00968	0.02179	0.01459
0.03207	0.02293	0.03649	0.02373
0.01817	0.01444	0.00426	0.01459
0.00688	0.02807	0.01704	0.02803
0.00587	0.0162	-0.02375	0.03437
0.04956	0.00522	0.04414	0.00113
-0.01485	0.03363	-0.00694	0.02023
0.01749	0.05154	0.03555	0.03947
-0.01418	0.0218	0.00152	0.01925
0.03581	0.00945	0.02955	0.02007
0.00554	0.03764	0.01027	0.03994
0.04286	0.0188	0.04939	0.01182
-0.00384	0.02423	-0.00341	0.04023
0.00908	0.0141	0.03527	0.00687
0.01635	0.06279	0.0402
0.02901	0.02735	0.04293	0.00016
-0.00884	0.0246	0.03002	0.01299
-0.00418	0.02369	0.00886	0.02397
0.009	0.01854	0.00972	0.01718
-0.00347	0.01476	0.02243	0.01411
0.02797	0.00405	0.04292
0.01863	0.00078	0.00696	0.02168
-0.00822		0.01822	0.0209
0.02873	0.03159	0.03345	0.00414
-0.00095	0.01394	-0.0169
0.00936	0.02028	0.03103	0.00068
0.01334	0.0215	0.02898
0.00668	0.01504	0.01364	0.0067
3e-05	0.00175	0.00724	0.03928
0.01552	0.0083	0.04144	0.0033
0.02433	0.00894	0.01996	0.00405
0.00913	0.00234	0.01609	0.00333
-0.00106	0.03721	0.02863	0.03067
0.00483	0.01515	0.03826	0.02389
0.04281	0.05426	0.03174	0.0292
-0.01145	0.03965	-0.02858
-0.01409	0.00654	-0.02781	0.02055
-0.013	0.02248	0.01008	0.0213
0.0097	0.02653	0.03214	0.02032
0.0083	0.0029	0.0013	0.04117
-0.01577	0.00842
0.01989	0.01417	0.0092	0.01215
-0.00258	0.02499	0.02078	0.01925
0.00245	0.01695	0.00618
0.0304	0.00964	0.03465	0.00124
-0.00144	0.02041	0.01149	0.00719
0.01082	0.01349	0.00916	0.03863
0.01631	0.02562	-0.01864	0.00717
0.04226	0.0143	0.0296	0.03155
0.03023	0.00352	0.02785	0.01317
0.00956	0.01955	-0.01672	0.03168
0.00919	0.00156	0.00998
0.02309	0.01397	0.01363
0.00314	0.02428	0.02033
0.01952	0.00324	0.01956	0.01408
0.02349	0.01839	0.0387	0.02921
0.00954	0.00311	0.01345	0.00656
0.05823	0.02419	0.02612
0.01998	0.02868	0.00361	0.02491
0.02084	0.00765	0.01056	0.02617
0.01657	0.0257	0.00904	0.01273
0.01491	0.01344	0.02368	0.01787
0.01233	0.01484	0.03747	0.00343
0.07459		0.01626	0.01396
0.01904	0.01904	0.04949	0.00244
0.03272	0.01517	0.05274	0.02382
0.00799	0.01139	0.03006	0.01322
0.00844	0.03093	0.01931	0.02683
0.01657		0.03328	0.00737
0.0176	0.02957	-0.03745
0.02801	0.02931	0.01282	0.01331
0.03207	0.04402	0.01133	0.05107
0.01421	0.00909	0.026	0.01375
-0.00604	0.02558	0.03097	0.02562
0.04439	0.00202	0.03303	0.00952
0.00971	0.00804	0.02219
0.01348	0.01856	0.02007	0.0312
0.02958	0.00879	0.03427	0.02478
0.00235	0.01846	0.04436	0.01005
0.0002	0.00055	0.02291	0.01486
0.0226	0.02703	0.02574	0.02763
0.03828	0.01424	0.03661	0.00366
0.03062	0.01519	0.01722	0.02831
0.00531	0.02939	0.02978	0.0372
0.01596	0.00634	-0.00824
0.0238	0.00374	0.01942	0.01658
0.00348	0.00679	0.03444
-0.00224	0.0172	0.01066
-0.01462	0.00561
0.02597	0.01384	0.01651	0.02953
0.00813	0.02984	0.00675
-0.01544	0.01026	-0.01992	0.01686
0.02037	0.01948	0.00564	0.00938
-0.01721	0.01217	0.0092
-0.00062	0.0011	-0.00324	0.0014
0.02669	0.00056	0.02223
0.00765	0.0003	-0.03825	0.00641
0.01014	0.01177	-0.01287	0.02544
-0.00766	0.00535	0.00451	0.00868
-0.00886	0.02899	-0.00761	0.02498
-0.00327	0.0144	0.0298	0.05116
0.00364	0.00183	0.0139	0.0201
-0.00702	0.02339	0.02248	0.02264
0.00509	0.0045	-0.0024	0.00318
0.01627	0.00514	0.00464	0.02403
-0.00022	0.0078	-0.00573	0.00345
0.02075	0.012	0.00694	0.00602
0.00822	0.01571	-0.00136	0.03136
-0.00557	0.00838	0.02979	0.00887
0.0006	0.0097	0.03468
-0.02549	0.04505	0.01144	0.03371
-0.00513	0.00552	-0.00145	0.06362
-0.00584	0.00675	0.01277	0.02726
0.0171	0.01592	0.00536	0.03999
0.00706	0.00949	0.04412
-0.02764	0.00838	-0.02693
-0.0065	0.01465	-0.00301	0.05732
0.02161	0.01584	0.00338
-0.00978	0.00504	0.02405
0.009	0.04564	0.01527	0.04999
-0.03074	0.00314	0.01855	0.035
0.024	0.02002	-0.02649	0.02327
0.0086	0.01372	-0.03301	0.03481
0.00213	0.01769	0.01266	0.02299
0.00277	0.00304	-0.01494	0.00057
-0.0189	0.0097	-0.01618	0.01657
0.00532	0.00533	-0.00169
0.00978	0.0207	0.00531	0.02166
0.02274	0.03258	-0.00192	0.02837
0.01283	0.02075	0.01395
0.01429	0.01153	-0.00758
0.02356	0.02771	-0.00361	0.00806
-0.02838	0.00151	-0.01099	0.00435
-0.00101	0.00427	-0.01365	0.02613
0.02195	0.00574	-0.0067
0.00666	0.03762	-0.02152
-0.00105	0.00354	-0.01366
0.03368	0.02787	0.01608	0.01702
-0.00196	0.02444	-0.02022	0.00194
0.00123	0.04112	0.00874	0.01677
-0.00868	0.00098	0.01748	0.01764
0.0199	0.01368	-0.0058	0.01257
0.02931	0.00461	0.02595
-0.00034	0.01507	0.01294	0.02632
-0.01143	0.01737	-0.00208	0.02829
0.00812	0.03295	0.03882
5e-05	0.0018	0.00466	0.01882
0.00481	0.02683	0.01203	0.00269
-0.01832	0.00781	-0.01581	0.01174
-0.00016	0.00834	0.01392	0.03227
0.00103	0.00868	0.01843	0.03087
0.01092	0.01473	0.00513	0.03134
-0.00172	0.00994	0.01746	0.02466
0.00651	0.0176	0.01421
-0.01332	0.01001	-0.0037	0.00832
0.01945	0.00077	0.00763	0.00957
-0.00437	0.0204	0.02246	0.02147
0.00688	0.00201	0.03108	0.03553
-0.03661	0.00044	-0.03825
0.00681	0.01014	0.00497	0.00558
0.00528	0.01982	-0.01442	0.04273
-0.00554	0.02052	-0.0118	0.03264
-0.02448	0.01984	-0.02885	0.02038
0.01377	0.00535	0.02318	0.02051
0.01093	0.02843	-0.00266	0.02906
0.00839	0.00787	-0.0019	0.01201
0.01184	0.02203	-0.02037	0.04606
0.01959	0.02315	0.02049	0.02709
0.00688	0.02564	0.01013
0.00421	0.01212	0.01534
-0.01833	0.03437	0.00091	0.00216
-0.00207	0.00408	0.00956	0.02417
0.00394	0.00397	0.01934	0.00387
-0.01208	0.04695	0.03698	0.05104
-0.01042	0.02021	-0.00471
0.01517	0.02684	0.01466	0.04737
-0.02238	0.00569	-0.00152	0.00587
0.02853	0.02423	-0.02938	0.02698
0.00213	0.03007	0.00789	0.01935
-0.01822	0.00926	0.01062	0.04537
0.02005	0.01989	0.01104	0.00604
0.01388	0.00095	0.01186
0.00166	0.02865	0.00674
0.00111	0.00044	0.03096	0.01765
-0.00755	0.04873	-0.00122	0.00025
-0.01644	0.01836	-0.01726	0.01114
0.01753	0.01583	0.00766	0.03582
-0.00057	0.01696	0.02078	0.01899
0.00052	0.00483	0.02496	0.00292
0.01455	0.01158	0.01349	0.00197
-0.00853	0.01951	0.01718	0.02674
-0.01547	0.03215	-0.009	0.02967
-0.0029	0.02432	-0.00227
-0.00038	0.00563	0.01201	0.01504
-0.0212	0.01322	-0.00768	0.00915
0.01365	0.01605	-0.00019	0.03397
0.02387	0.01569	0.02793
0.00718	0.0017	0.01271	0.0206
-0.0168	0.00643	-0.02542
-0.02635	0.01918	-0.00808	0.02871
0.01689	0.01096	0.00418
0.01342	0.00248	0.01913	0.0003
0.01502	0.01748	0.03684	0.0272
0.01427	0.01248	-0.0119	0.03714
0.00735	0.00096	0.00457	0.04081
0.0142	0.0046	0.01068	0.01161
-0.02419	0.00472	0.00523	0.01423
-0.00678	0.04105	0.00695	0.03237
-0.01429	0.00954	-0.00204	0.00341
0.00811	0.01651	0.00456	0.00623
0.01226	0.01576	-0.00359	0.05097
-0.00665	0.00344	0.01552	0.00676
-0.00092	0.01974	0.02126	0.00615
0.02413	0.03914	-0.01178	0.02736
0.0004	0.00731	-0.0156
0.01689	0.00612	0.00111	0.02719
-0.00566	0.0256	0.03802
-0.0176	0.00901	0.02374	0.00832
-0.005	0.0043	0.01143	0.01042
-0.01599	0.01643	-0.00593	0.00936
-0.00627	0.02493	-0.00409	0.00332
0.01471	0.01478	-0.02128	0.00081
0.00284	0.02754	-0.01644	0.02394
0.0073	0.01796	0.01437	0.03253
-0.00079	0.01528	0.01784	0.01794
-0.00309	0.02489	0.02296
-0.01722	0.01534	-0.00881	0.00599
-0.00564	0.00573	-0.01988	0.02376
0.01549	0.02334	0.00816	0.0102
0.00054	0.00703	0.03341
-0.01918	0.00335	0.00963	0.00641
-0.01006	0.02937	-0.01078	0.03812
-0.01587	0.04947	-0.01227	0.01134
0.00319	0.03444	0.01778	0.00075
-0.0323	0.04425	0.00274	0.04228
0.02573	0.05678	0.06664
-0.00391	0.03237	0.03005
0.00071	0.04052	-0.00356
-0.00461	0.00428	0.0087	0.01504
0.02942	0.0078	0.02457	0.0123
0.0003	0.03551	0.02484	0.00042
0.06222	0.02736	0.00633	0.01028
-0.02546	0.02212	0.00211	0.0179
-0.00375	0.01623	0.00922	0.00193
-0.00186	0.02416	0.02102
-0.00361	0.01091	0.02672	0.00785
0.01424	0.03279	0.01581	0.01295
-0.02989	0.00614
-0.01882	0.00894	0.01517	0.01351
-0.00053	0.0243	0.00803	0.00675
0.00645	0.04627	0.01819	0.00915
5e-05	0.04658	-0.00872	0.005
0.01479	0.012	0.03111	0.02324
0.01204	0.03289	0.01597	0.0155
-0.00975	0.01125	-0.00504	0.01134
0.01724	0.03222	0.00816	0.01527
0.00318	0.00287	0.01173	0.00856
-0.00465	0.02766	-0.00118	0.01159
0.01448	0.00638	0.01768	0.0001
-0.00176	0.03513	-0.01467	0.00059
-0.02291	0.02353	0.01408	0.00577
-0.02298	0.02774	-0.00057
0.00201	0.03521	-0.00133	0.01149
0.00135	0.02778	0.02216
0.00509	0.01884	0.01876
-0.01532	0.04881	0.0084	0.00716
-0.01264	0.02541	0.0282	0.02427
0.00386	0.02681	0.02129	0.02206
-0.0136	0.00978	0.02658	0.00856
-1e-05	0.03824	-0.00164	0.02309
-0.01106	0.00886	0.02127	0.02939
-0.02776	0.01041	0.02591	0.01378
-0.02249	0.05903	0.01877	0.02181
0.01228	0.05947	0.01565
0.00034	0.00027	-0.01205	0.00893
-0.00325	0.0077	0.00749	0.00244
-0.04403	0.00029	-0.01453
-0.00055	0.00384	-0.01057	0.03475
-0.02265	0.01342	-0.01045	0.00093
0.01455	0.0229	0.02824	0.00715
-0.00776	0.00531	0.0032	0.0058
-0.00483	0.04486	0.00986	0.02492
0.00164	0.02976	-0.01108	0.0026
0.03205	0.02483	0.02121	0.01613
0.01353	0.01823	-0.00952	0.02432
0.00017	0.00686	0.00421	0.00615
0.02621	0.02153	0.00057	0.00919
0.04155	0.01474	0.0039	0.01112
-0.01604	0.03864	-0.02703	0.01468
0.0233	0.00216	0.02806	0.01951
-0.00088	0.04037	0.00895	0.01894
-0.00936	0.02615	0.0195	0.03695
0.01115	0.00057	0.02698	0.02409
0.04589	0.02645	-0.00506	0.00429
0.01697	0.03585	0.00836	0.02487
0.02668	0.01285	0.02922	0.00836
0.04462	0.00776	0.02587	0.01022
0.00985	0.00143	-0.00839	0.0091
0.01705	0.0159	-0.02096	0.04869
0.03146	0.01157	0.01165	0.01353
-0.0081	0.03618	-0.00822	0.01975
0.02448	0.02297	0.0069	0.00143
0.00072	0.00418	0	0.02132
0.01543	0.01368	0.01513	0.01129
-0.00266	0.03679	0.00916	0.03294
0.02255	0.01047	0.00014	0.00336
0.01442	0.01263	-0.02549
0.00731	0.01722	0.01626	0.02178
0.01579	0.02324	-0.00156	0.02546
-0.02201	0.00468	-0.01147	0.01181
0.01507	0.02268	-0.02901
0.01616	0.01963	0.01713	0.02002
0.01723	0.00332	0.01056	0.00214
0.00976	0.01753	0.00371	0.01911
0.02046	0.01595	-0.00052	0.02724
0.00467	0.04674	-0.00999	0.02424
0.00234	0.02021	-0.00725	0.01972
-0.00615	0.01946	0.00944	0.02324
-0.01561	0.02945	0.00783	0.02206
0.02362	0.03651	0.02111	0.00816
-0.00666	0.03326	-0.00184	0.04267
-0.01345	0.02007	0.01827	0.00889
-0.02129	0.00327	0.00939	0.02986
-0.00229	0.00307	0.01796	0.05357
-0.02653	0.01246	0.02286	0.00477
-0.0062	0.03557	0.00591	0.01179
-0.00819	0.03968	-0.00317	0.02827
-0.02089	0.03612	-0.01225	0.03134
-0.03935	0.00807	0.00419	0.01372
0.02385	0.01519	0.02185	0.00658
0.01348	0.04354	0.02339	0.01787
-0.00164	0.00685	-0.00902	0.01315
0.00746	0.01953	0.00918	0.00553
0.01105	0.02126	0.01441	0.01003
-0.01824	0.02755	0.01075
-0.01314	0.00164	0.00151	0.00183
-0.02147	0.02577	-0.00212	0.02366
-0.00622	0.05367	0.00025	0.0088
-0.011	0.001	0.00482	0.00251
0.00632	0.00645	0.01739
0.0042	0.03069	0.01319	0.00175
-0.01993	0.01559	0.00148	0.0292
-0.02767	0.02398	0.01632
-0.01606	0.01077	-0.00765	0.01422
-0.00501	0.02599	0.00873	0.01466
-0.02137	0.00113	-7e-05
-0.02427	0.03568	0.00572	0.01908
-0.00762	0.0188	0.02452
-0.01633	0.03714	-0.00789	0.00358
-0.00411	0.02448	0.02594	0.02076
0.00731	0.02337	0.02071	0.03041
-0.01344	0.03299	-0.0087	0.01955
-0.01883	0.00928	0.02394	0.01008
0.00031	0.00151	-0.01138
0.01147	0.03105	0.01861	0.033
0.02822	0.0159	0.01107	0.01324
-0.03799	0.01642	0.03948	0.0164
0.02612	0.01339	0.04144	0.00714
-0.01433	0.03249	-0.01403	0.01776
0.01726	0.01222	0.01839	0.01047
-0.00808	0.00904	0.02712	0.01451
-0.0087	0.03805	0.02949
-0.00301	0.03734	0.01068	0.01272
0.00442	0.02988	-0.00661	0.02801
0.01871	0.02127	0.03756	0.0212
-0.02073	0.04342	0.0101	0.01184
0.01272	0.00678	0.02835	0.00828
-0.0075	0.00246	0.02874	0.00429
-0.02025	0.03915	0.00131	0.02334
-0.0064	0.0194	-0.04066	0.04104
0.00085	0.03236	0.0315	0.02781
0.02434	0.03595	-0.00208	0.02451
-0.02054	0.02477	0.00405	0.00321
0.00275	0.02267	0.01141	0.00647
-0.00752	0.03121	0.01607	0.02104
0.00886	0.01694	-0.02343	0.01963
0.00122	0.0537	0.00207
0.00507	0.03113	0.02378	0.00021
0.02022	0.01394	0.00761	0.00818
-0.00177	0.01474	0.0015	0.03028
0.00746	0.00418	0.0389	0.00778
0.015	0.01866	0.02251	0.02008
-0.00306	0.03976	0.0302	0.00235
-0.00763	0.00926	0.03107	0.02927
-0.01308	0.04134	0.02347	0.00711
-0.02636	0.02443	-0.01007	0.01312
-0.03016	0.0072	0.01992	0.00598
0.02652	0.00132	0.01547	0.0332
0.0085	0.03198	0.02262	0.04297
0.00142	0.01313	-0.00362	0.04831
0.02167	0.02565	-0.01543	0.00987
-0.00326	0.00051	0.03231	0.00107
-0.00967	0.02221	0.01	0.04062
0.01467	0.00391	0.0181	0.02984
0.01823	0.03439	0.01082	0.02559
-0.03513	0.0122	-0.01224	0.01215
0.00218	0.03127	0.02372	0.00649
0.0163	0.02643	-0.01362	0.03177
-0.00612	0.0174	-0.00802	0.0232
0.01072	0.01524	-0.02452	0.03307
0.02908	0.00236	0.04114	0.00833
0.02851	0.00723	-0.0013	0.00863
0.02106	0.01915	0.05439	0.03138
0.00491	0.04185	0.02397	0.03158
-0.02542	0.00105	-0.00018	0.00593
0.00618	0.02686	0.0134	0.02627
-0.01932	0.02078	-0.00097	0.02381
-0.01673	0.01201	-0.00064	0.03136
-0.00388	0.03994	0.03471	0.01338
0.0388	0.00014	0.01684	0.01638
0.00635	0.04611	0.01238	0.03006
-0.0205	0.01134	0.02027	0.0389
0.01227	0.02554	0.02103	0.02013
-0.00441	0.02533	0.01972	0.03675
-0.01208	0.00821	0.02072	0.02498
-0.01651	0.0398	0.02507	0.01542
-0.00641	0.01645	0.00765	0.03838
0.00642	0.01393	-0.00231	0.01614
-0.00213	0.02725	0.01188	0.01451
-0.03282	0.03095	0.02452	0.03251
-0.04627	0.02833	-0.01909	0.01282
0.00906	0.0464	0.0126	0.00763
-0.00842	0.0445	-0.00408	0.01914
0.0056	0.00012	0.02228	0.03194
-0.00331	0.00471	0.03059	0.01854
-0.02588	0.04828	-0.01622
-0.04009	0.01085	-0.00768	0.04106
0.0258	0.02387	0.03005	0.00796
0.00083	0.03936	-0.01181	0.02078
0.01205	0.04644	0.03546	0.00444
0.0328	0.00214	0.01151	0.02731
-0.00288	0.04197	0.00762	0.02177
-0.00273	0.0134	0.02892	0.00691
0.0073	0.00305	-0.005
0.00624	0.02973	0.01381	0.02157
-0.03485	0.0091	-0.00431	0.02172
-0.02141	0.0097	0.01088	0.01357
0.00871	0.03395	0.01629	0.00035
-0.00021	0.03734	0.00112	0.05813
0.01154	0.00986	0.00759	0.00245
-0.00337	0.03338	0.03741	0.00537
-0.01649	0.00026	0.02835	0.00204
0.00331	0.0161	0.03665	0.01346
-0.0213	0.00957	-0.02192	0.0056
0.00285	0.02341	-0.00417	0.00278
-0.0307	0.01165	-0.00153	0.01348
-0.01043	0.01074	0.02205	0.01952
-0.00165	0.02831	0.00948	0.02317
0.01089	0.01224	-0.01491
-0.02539	0.0157	0.03777
-0.01952	0.00746	-0.00301	0.03639
0.00053	0.00958	0.01268	0.02418
0.00061	0.03083	0.01915	0.03122
-0.01946		-0.00923	0.00595
-0.01322	0.04531	0.00308
-0.01603	0.02606	0.03175	0.02477
-0.01573	0.00796	0.00693	0.00855
-0.00215	0.0377	-0.00445	0.01671
-0.00984	0.00592	0.01948	0.01247
-0.01471	0.05388	0.00627	0.00243
-0.00642	0.02765	0.02298	0.02902
-0.00903	0.00737	0.01246	0.01362
0.00927	0.0303	0.01398
0.01704	0.0007	0.04745
0.00101	0.03324	0.01118	0.01928
0.00972	0.01694	0.00834	0.00844
0.01516	0.00771	0.02177	0.00312
0.0077	0.02957	-0.02726	0.01678
0.00639	0.04646	-0.01159	0.01493
-0.0008	0.0301	-0.00169	0.02667
0.04292	0.03262	-0.01218	0.02298
0.01075	0.00471	0.00323	0.02413
0.00602	0.01767	0.02224	0.02057
-0.00317	0.02831	0.00502	0.00782
0.00623	0.03003	0.00771	0.03306
-0.03153		0.00851	0.03888
0.0061	0.02537	0.03255	0.01254
0.01905	0.02315	0.00849	0.03157
-0.02525	0.01465	-0.02553	0.03118
0.00762	0.00052	0.02016	0.01492
-0.02067	0.02589	-0.00564	0.02008
-0.00648	0.05703	0.02606	0.01962
0.01873	0.02016	0.01704	0.02005
-0.00592	0.00802	0.03331	0.01653
-0.0034	0.01092	0.01763	0.02902
-0.00418	0.03358	0.00507	0.00552
-0.00105	0.00029	0.00917	0.02245
0.02593	0.03694	0.01608	0.02209
0.01167	0.01859	0.0407	0.02989
0.01994	0.01127	0.04214
0.00268	0.04366	-0.00475	0.01071
-0.01469	0.05694	0.01926	0.01631
-0.01803	0.00756	0.03598
0.01906	0.02666	0.0354	0.02543
0.01458	0.02212	0.00449	0.00467
-0.01516	0.01305	0.02025	0.06314
0.00807	0.00082	0.04006	0.01495
-0.03687	0.01045	0.00585	0.04542
0.02048	0.03339	0.00347	0.03872
0.02678	0.02025	0.00691	0.0046
0.0101		0.0036
-0.00224	0.00767	0.01111	0.00385
0.02294	0.00817	0.02124	0.02218
0.0426	0.00511	0.01393	0.00844
0.02025	0.02533	-0.03839	0.01356
-0.00278	0.01695	0.00347	0.00518
0.00381	0.01287	-0.01335	0.05275
0.07777		0.01424	0.02318
0.03957	0.00105	0.02864	0.02533
0.011	0.00444	-0.00458	0.00513
-0.02513	0.02099	-0.01056	0.0097
0.01696	0.0033	-0.00024	0.01111
0.01027	0.01079	0.00492	0.03895
0.03775	0.00833	0.02507	0.01703
0.01874	0.03531	0.01064	0.0145
-0.01266	0.00833	0.0157	0.00385
0.02553	0.00724	0.00346	0.01335
0.00074	0.00923	-0.02609	0.00051
0.05071	0.03547	-0.00573	0.03517
0.01387	0.02459	-0.01634	0.01167
0.00168	0.02798	-0.02737	0.02775
0.00312	0.00951	-0.01223	0.00812
0.0127	0.02132	-0.01073	0.00568
-0.00535	0.00329	-0.00288
0.01639	0.02869	-0.02229	0.01543
-0.01062	0.02759	-0.01184	0.01732
0.01813	0.00927	-0.00182
-0.0162		0.04682
0.00707	0.00991	0.01168	0.01864
0.01611	0.01997	0.00265	0.03341
0.01492	0.0075	0.00613
0.03476	0.0169	-0.00221	0.01116
0.00987	0.01892	-0.02347	0.03426
0.03395	0.00064	0.03782
0.01665	0.01494	0.01189	0.00426
0.02696	0.01559	-0.02552	0.01114
0.01481	0.03993	0.00373	0.02907
-0.00383	0.02561	-0.00259	0.02154
0.02385	0.03323	0.00472	0.04135
-0.01562	0.01666	-0.00103	0.02143
0.01321	0.02157	0.00398	0.02243
0.0104	0.0007	0.02366	0.01981
0.01321	0.01739	-0.03132	0.02176
0.00805	0.03117	-0.00632
0.01734	0.00631	0.00219	0.00505
0.02513	0.01355	0.00545	0.01987
0.00061	0.01012
0.02868	0.00134	0.03263	0.03396
-0.00308	0.01391	0.03654
0.00847	0.01514	0.00256
-0.00433	0.00616	0.04906
-0.00031	0.01324	0.00865
0.00081	0.01745	0.00805	0.01723
0.01264	0.00985	-0.02459	0.01597
-0.0164	0.00219
0.01601	0.01212	0.01991	0.01713
0.02363	0.00582	0.01423
-0.01086	0.01144	0.02956	0.0002
0.01969	0.01199	0.04493
0.01037	0.02346	0.04066
-0.02367	0.01029	-0.00898
-0.00384	0.0049
-0.01829	0.0119	-0.02589
-0.00071	0.02313	0.06181
0.01602	0.01804	0.00736	0.00017
-0.01931	0.03699
-0.00075	0.02078	-0.00081
0.01646	0.01371	0.03767	0.01246
0.00832	0.00818	0.0161
0.005	0.02313	0.01075
0.00372	0.00123	-0.01047	0.00764
-0.01344	0.0066	-0.01076	0.02489
0.0057	0.00515	0.00128	0.00234
-0.01745	0.00402	-0.01851	0.02098
-0.01208	0.00477	0.04513	0.02775
0.02311	0.0106	0.00319
-0.0071	0.03224	0.02596	0.01945
-0.00377	0.00407	-0.00647	0.00954
-0.00314	0.00646	0.0292
-0.00432	0.04657	0.00295
0.02401	0.03714	0.01281	0.01251
0.01087	0.01689	0.01395
0.00896	0.00386	0.01619	0.02582
-0.00116	0.01443	0.01334
[truncated: 3,178 more rows]

## Sheet: Supplement 1A
Sec	Estradiol
0	0	0
0.01	988	204
0.02	1565.5	335
0.03	2081	468
0.04	2568	559
0.05	3010	650
0.06	3367.5	730
0.07	3747	808.5
0.08	4170	968
0.09	4524	1018.5
0.1	4811.5	1046.5
0.11	5090	1114
0.12	5382	1219
0.13	5683	1312.5
0.14	5958	1386.5
0.15	6190	1465

## Sheet: Supplement 1B
Frame	DMSO median JL			Estradiol Median JL
	Mean	SD	N	Mean	SD	N
0	0.216008	0.0447749	109	0.0708705	0.0212216	48
10	0.200005	0.0427463	109	0.0750417	0.0148571	48
20	0.199724	0.0433794	110	0.0752678	0.0116916	48
30	0.20413	0.0425347	110	0.074916	0.0155487	48
40	0.204847	0.04638	109	0.0801679	0.0247961	48
50	0.203434	0.0480801	110	0.0762399	0.0164234	48
60	0.198072	0.0669149	110	0.0768023	0.0118354	48
70	0.200751	0.0612852	110	0.0856946	0.0228643	48
80	0.208157	0.0771801	109	0.0775092	0.0176327	48
90	0.200217	0.0551626	109	0.0785259	0.0182661	48
100	0.205163	0.055671	109	0.0795633	0.0187996	48
110	0.194388	0.059875	109	0.0826916	0.0184216	48
120	0.208504	0.0595136	110	0.0842593	0.0176522	48
130	0.209254	0.0668478	110	0.0819449	0.0169537	48
140	0.206773	0.0704383	110	0.0812113	0.0202219	48
150	0.211643	0.09159	110	0.0819831	0.0124781	48
160	0.196113	0.0613189	109	0.0836408	0.0236512	48
170	0.196136	0.062622	110	0.079927	0.0188119	48
180	0.209856	0.0730555	110	0.0799453	0.0213998	48
190	0.20246	0.0784952	110	0.0835928	0.0243743	48
200	0.197673	0.0714106	110	0.0924676	0.0440684	48
210	0.197859	0.080087	110	0.0875035	0.0277342	48
220	0.203405	0.0848361	110	0.0898112	0.0310384	48
230	0.205768	0.0715757	109	0.0887461	0.0362731	48
240	0.195244	0.0755439	108	0.0940284	0.045365	48
250	0.186493	0.0696743	108	0.0810407	0.0287983	48
260	0.195465	0.0797988	108	0.0823352	0.0194751	48
270	0.192348	0.0761829	107	0.0814608	0.0240029	48
280	0.202021	0.0799991	108	0.0824528	0.0310284	48
290	0.196203	0.0909284	109	0.081115	0.0204833	48
300	0.207132	0.0957653	108	0.0797294	0.0255112	47
310	0.198923	0.100028	108	0.0772084	0.0264039	48
320	0.202517	0.1008	108	0.0848083	0.0280284	48
330	0.19274	0.0996451	107	0.0844905	0.0427709	47
340	0.205047	0.134736	106	0.0826378	0.0315323	48
350	0.189054	0.090474	106	0.0919438	0.0345956	48
360	0.182281	0.0945714	105	0.080371	0.0228539	47
370	0.182519	0.102919	104	0.0789104	0.0296704	47
380	0.20454	0.101442	105	0.0853423	0.0280792	47
390	0.205179	0.105241	104	0.0826171	0.0229595	46
400	0.214191	0.123287	104	0.0836604	0.0319516	47
410	0.211034	0.119403	105	0.0840291	0.030772	46
420	0.193203	0.100756	102	0.0955643	0.0742022	45
430	0.192255	0.0926546	104	0.0856532	0.0311673	46
440	0.183451	0.100036	102	0.102745	0.112635	46
450	0.193442	0.109282	106	0.0815688	0.0297179	46
460	0.189751	0.0961887	101	0.0842171	0.0254583	46
470	0.189833	0.100196	100	0.0958974	0.0643319	46
480	0.198943	0.140834	102	0.10665	0.0742357	45
490	0.206611	0.125125	104	0.101702	0.091496	44
500	0.191114	0.09909	101	0.0853505	0.0392705	44
510	0.203784	0.134641	98	0.0745204	0.0238146	44
520	0.208173	0.141073	100	0.0929621	0.0442343	45
530	0.205947	0.130688	102	0.0899603	0.0394023	43
540	0.214798	0.158713	99	0.0984847	0.0616739	42
550	0.206776	0.127537	98	0.0850888	0.0364829	44
560	0.20344	0.128769	100	0.0822581	0.0333025	42
570	0.193807	0.129452	98	0.100151	0.0801531	41
580	0.20363	0.122539	99	0.0815498	0.0568448	43
590	0.180672	0.143101	98	0.11476	0.08709	43
600	0.210407	0.15245	102	0.0808946	0.0346347	41
610	0.204617	0.141285	103	0.0953399	0.121802	41
620	0.191712	0.111395	100	0.0841549	0.0420826	41
630	0.182694	0.11818	95	0.0825868	0.0365996	39
640	0.180255	0.129515	94	0.0966525	0.0840432	41

## Sheet: Supplement4
	DMSO		Estradiol
DMSO	7.81e-18	0.0124208	0.603617	0.01343
Brilnestrant	0.474413	0.0161397	0.563552	0.00616887
AZD9496	0.461729	0.0173958	0.518581	0.018235
	DMSO		Progesterone
DMSO	1.54989e-06	0.015268	0.249148	0.02762
Mifeprestone	0.256059	0.032674	0.276356	0.025191
	DMSO		DHT
DMSO	2.98467e-05	0.021577	0.294491	0.035046
Enzalutamide	-0.0744028	0.018209	0.195025	0.012627
Darolutamide	-0.0320845	0.001394	0.191891	0.01739
	DMSO		Dex
DMSO	7.44339e-06	0.028994	0.156785	0.035
AL082D06	-0.0413081	0.009597	0.11666	0.015082

## Sheet: Supplement3BC
Sample sizes	Microscope	Plate	Well	FOV	cell
1	0.029507	0.029779	0.030184	0.030379	0.032615
2	0.014799	0.014826	0.015618	0.015748	0.017237
4	0.007444	0.00751	0.008132	0.008389	0.009696
8	0.003695	0.00376	0.004502	0.004705	0.0059
16	0.001872	0.001909	0.002691	0.00286	0.004002
32	0.000933	0.000978	0.001781	0.001938	0.003042
64	0.000471	0.000521	0.001336	0.001479	0.00254
128	0.00024	0.000288	0.001089	0.001233	0.002316
256	0.000122	0.00017	0.000985	0.001125	0.002199
512	6.5e-05	0.000113	0.000915	0.001055	0.00212
1024	3.6e-05	8.3e-05	0.000882	0.00103	0.0021
2048	2.1e-05	6.8e-05	0.00087	0.001009	0.00209
8192	1e-05	5.8e-05	0.000878	0.000997	0.002074
	Microscope-to-Microscope	Plate-to-Plate	Well-to-Well	FOV-to-FOV	Cell-to-Cell
All wells	6.59e-06	4.74e-05	0.000799	0.000149	0.00107
DMSO only	9.45e-06	6.18e-05	6.18e-05	0.00016	0.001149

## Sheet: Supplement 3A
	delFbound	SD
Fulvestrant	0.55109	0.00116
Estradiol valerate	0.53017	0.00391
Estradiol	0.52817	0.02126
Ethinyl Estradiol	0.52779	0.02766
Estriol	0.50466	0.01046
Estradiol Benzoate	0.48781	0.00043
Genistein glucoside	0.48642	0.00846
Estradiol Cypionate	0.47408	0.00944
β-Estradiol 17-Acetate	0.4723	0.01936
Estrone	0.46944	0.00452
Genistein	0.46619	0.01255
17-Beta-Estradiol-3	0.46411	0.00676
Dienestrol	0.44538	0.00334
Stilbestrol	0.44129	0.00619
Bazedoxifene Acetate	0.41161	0.01362
Piperazine estrone sulfate	0.40623	0.00851
GDC-0810	0.39141	0.01784
Cyclofenil	0.37227	0.02394
H3B-5942	0.34278	0.01549
Endoxifen HCl	0.33838	0.03183
Ospemifene	0.32716	0.02043
Clomifene citrate	0.32614	0.01837
Raloxifene	0.32414	0.02254
Toremifene Citrate	0.30657	0.00137
4-Hydroxytamoxifen	0.29653	0.03738
Tamoxifen Citrate	0.29385	0.03803
Liquiritigenin	0.2661	0.00285
