# Supplementary material for: A high-throughput platform for single-molecule tracking identifies drug interaction and cellular mechanisms
Source: eLife. 2025 Jan 9;12:RP93183. doi: 10.7554/eLife.93183 (PMC11717362; doi:10.7554/eLife.93183)
Supplement: Figure 4—source data 1. [file elife-93183-fig4-data1.xlsx]

## Sheet: State Arrays
	DMSO			Fulvestrant			4OHT			GDC-0810			AZD9496			GDC-0927
Diffusion coefficient	Occupation mean	SD	N FOV	Occupation mean	SD	N FOV	Occupation mean	SD	N FOV	Occupation mean	SD	N FOV	Occupation mean	SD	N FOV	Occupation mean	SD	N FOV
0.01	0.107567	0.057768	583	0.285124	0.11462	166	0.248209	0.08023	40	0.263448	0.071662	40	0.286478	0.095531	71	0.305649	0.104935	40
0.010975	0.047585	0.016099	583	0.125269	0.022085	166	0.117696	0.018348	40	0.11745	0.013895	40	0.119412	0.018834	71	0.132438	0.018722	40
0.012045	0.028682	0.008416	583	0.073971	0.012902	166	0.069447	0.008463	40	0.068261	0.009635	40	0.06757	0.011206	71	0.076205	0.013005	40
0.013219	0.020321	0.005875	583	0.051258	0.011391	166	0.04699	0.007885	40	0.046131	0.009104	40	0.045457	0.010272	71	0.051124	0.011517	40
0.014508	0.01586	0.004675	583	0.039156	0.010316	166	0.034988	0.007599	40	0.034396	0.008319	40	0.034084	0.009344	71	0.037966	0.01008	40
0.015923	0.013158	0.003956	583	0.031844	0.009337	166	0.027912	0.007194	40	0.027427	0.007441	40	0.027431	0.008375	71	0.030245	0.008788	40
0.017475	0.011364	0.003457	583	0.027003	0.008484	166	0.023417	0.006808	40	0.022919	0.006586	40	0.02315	0.007479	71	0.025301	0.007722	40
0.019179	0.010087	0.00308	583	0.023568	0.007764	166	0.020387	0.006482	40	0.0198	0.005798	40	0.020187	0.006688	71	0.021901	0.006867	40
0.021049	0.009129	0.002781	583	0.021001	0.007168	166	0.018239	0.006207	40	0.017526	0.005098	40	0.018015	0.006004	71	0.019425	0.00619	40
0.023101	0.008381	0.002537	583	0.018991	0.006672	166	0.016645	0.00596	40	0.015793	0.004507	40	0.016349	0.005415	71	0.017528	0.005647	40
0.025354	0.007776	0.002334	583	0.017357	0.006251	166	0.015405	0.005715	40	0.014424	0.00404	40	0.015023	0.00491	71	0.016009	0.005204	40
0.027826	0.007271	0.002163	583	0.015982	0.005883	166	0.01439	0.005451	40	0.013306	0.003691	40	0.01393	0.004474	71	0.014743	0.004822	40
0.030539	0.006837	0.002015	583	0.014784	0.005543	166	0.013507	0.005146	40	0.012362	0.003431	40	0.012996	0.004095	71	0.013647	0.004479	40
0.033516	0.006454	0.001883	583	0.013704	0.005212	166	0.012698	0.004789	40	0.01153	0.003213	40	0.012172	0.003766	71	0.012662	0.004155	40
0.036784	0.006108	0.001763	583	0.012703	0.004873	166	0.011918	0.00438	40	0.010763	0.002983	40	0.011419	0.003475	71	0.011755	0.003843	40
0.04037	0.005788	0.001652	583	0.011752	0.004517	166	0.011144	0.003935	40	0.010038	0.00271	40	0.010706	0.003219	71	0.010898	0.003533	40
0.044306	0.005486	0.001546	583	0.010833	0.004136	166	0.010361	0.00348	40	0.009347	0.002403	40	0.010014	0.002986	71	0.010076	0.003216	40
0.048626	0.005199	0.001444	583	0.009942	0.003728	166	0.009574	0.003047	40	0.008691	0.002105	40	0.00933	0.002766	71	0.009282	0.002895	40
0.053367	0.004923	0.001346	583	0.00908	0.00331	166	0.008796	0.002656	40	0.008073	0.001853	40	0.008647	0.002542	71	0.008516	0.002579	40
0.05857	0.004658	0.001249	583	0.008259	0.002903	166	0.008044	0.002316	40	0.007493	0.001656	40	0.00797	0.002317	71	0.007791	0.002283	40
0.064281	0.004406	0.001152	583	0.007488	0.002531	166	0.007334	0.002026	40	0.00695	0.001498	40	0.007311	0.002094	71	0.00711	0.002018	40
0.070548	0.004168	0.001053	583	0.006776	0.002203	166	0.00668	0.001779	40	0.006437	0.001357	40	0.006687	0.001884	71	0.006473	0.001785	40
0.077426	0.003946	0.000957	583	0.006126	0.001921	166	0.006093	0.001569	40	0.005955	0.001224	40	0.00611	0.001691	71	0.005885	0.00158	40
0.084975	0.003743	0.000869	583	0.005543	0.001688	166	0.005578	0.001394	40	0.005501	0.001097	40	0.005588	0.001512	71	0.005348	0.001403	40
0.09326	0.003562	0.000794	583	0.005029	0.001502	166	0.005137	0.001251	40	0.005082	0.000979	40	0.005122	0.001348	71	0.004864	0.001254	40
0.102353	0.003405	0.000735	583	0.004579	0.001357	166	0.004764	0.001142	40	0.004702	0.000876	40	0.004711	0.001201	71	0.004432	0.001125	40
0.112332	0.003272	0.000691	583	0.00419	0.001243	166	0.004457	0.001065	40	0.004365	0.000802	40	0.004354	0.001078	71	0.004051	0.001012	40
0.123285	0.003163	0.000659	583	0.003854	0.001151	166	0.004209	0.001017	40	0.004072	0.000762	40	0.004049	0.000983	71	0.003715	0.000914	40
0.135305	0.003079	0.000638	583	0.003564	0.001075	166	0.004012	0.000991	40	0.003825	0.000753	40	0.003792	0.000917	71	0.003423	0.00083	40
0.148497	0.00302	0.000626	583	0.003317	0.00101	166	0.003859	0.000976	40	0.003623	0.000764	40	0.003582	0.000878	71	0.003173	0.000761	40
0.162975	0.002984	0.000623	583	0.003108	0.000958	166	0.003741	0.00096	40	0.00346	0.000779	40	0.003412	0.000859	71	0.002962	0.000708	40
0.178865	0.002971	0.000626	583	0.002935	0.000918	166	0.003651	0.00094	40	0.003332	0.00079	40	0.003279	0.000854	71	0.002788	0.000671	40
0.196304	0.002984	0.000635	583	0.002796	0.000892	166	0.003586	0.000918	40	0.003236	0.000794	40	0.003179	0.000859	71	0.002647	0.00065	40
0.215443	0.003022	0.000651	583	0.002689	0.00088	166	0.003549	0.000902	40	0.00317	0.000795	40	0.003109	0.000871	71	0.002536	0.000642	40
0.236449	0.003088	0.000673	583	0.002611	0.000882	166	0.003539	0.000895	40	0.003135	0.000801	40	0.003068	0.000891	71	0.002451	0.000643	40
0.259502	0.003182	0.000702	583	0.00256	0.000897	166	0.003555	0.000888	40	0.003135	0.000817	40	0.003058	0.000921	71	0.002386	0.000649	40
0.284804	0.003307	0.000739	583	0.002532	0.000928	166	0.0036	0.000889	40	0.00317	0.000839	40	0.003076	0.000959	71	0.002339	0.000653	40
0.312572	0.003465	0.000786	583	0.002527	0.000973	166	0.003679	0.000919	40	0.003237	0.000864	40	0.00312	0.001001	71	0.002307	0.000656	40
0.343047	0.003657	0.000843	583	0.002541	0.001027	166	0.003795	0.000985	40	0.003336	0.000894	40	0.003188	0.001038	71	0.002289	0.000658	40
0.376494	0.003885	0.000904	583	0.002573	0.001082	166	0.003941	0.001063	40	0.003464	0.000936	40	0.003281	0.001074	71	0.002286	0.000663	40
0.413201	0.004151	0.000972	583	0.002617	0.001129	166	0.004109	0.001132	40	0.003621	0.000998	40	0.003404	0.001121	71	0.002297	0.000678	40
0.453488	0.00446	0.001049	583	0.002673	0.00116	166	0.004288	0.00119	40	0.003801	0.00108	40	0.003558	0.00118	71	0.002323	0.000702	40
0.497702	0.004813	0.001141	583	0.002736	0.001176	166	0.004464	0.001231	40	0.004005	0.001184	40	0.003729	0.001225	71	0.002363	0.00073	40
0.546228	0.005214	0.001244	583	0.002804	0.001188	166	0.004627	0.001257	40	0.004218	0.001297	40	0.003901	0.001238	71	0.002415	0.000756	40
0.599484	0.005657	0.001342	583	0.002877	0.00121	166	0.004788	0.001281	40	0.004421	0.001377	40	0.004069	0.001223	71	0.002476	0.000775	40
0.657933	0.006141	0.001443	583	0.002951	0.001248	166	0.004965	0.001307	40	0.004593	0.001377	40	0.004228	0.001189	71	0.002544	0.000779	40
0.722081	0.006671	0.001553	583	0.00302	0.001287	166	0.005171	0.001337	40	0.004742	0.001342	40	0.00438	0.001163	71	0.00261	0.000767	40
0.792483	0.00725	0.001681	583	0.003078	0.001314	166	0.005392	0.001365	40	0.004897	0.001336	40	0.004532	0.001173	71	0.002671	0.000747	40
0.869749	0.007892	0.001831	583	0.003123	0.001333	166	0.005602	0.001403	40	0.005067	0.00136	40	0.004694	0.001229	71	0.002725	0.000738	40
0.954548	0.00861	0.002001	583	0.003156	0.001353	166	0.005786	0.001498	40	0.005249	0.001394	40	0.004868	0.001324	71	0.002774	0.000757	40
1.04762	0.009414	0.002184	583	0.003182	0.001385	166	0.005942	0.00165	40	0.005426	0.001416	40	0.005048	0.001448	71	0.002819	0.000813	40
1.14976	0.010309	0.00237	583	0.003201	0.001421	166	0.006038	0.001713	40	0.005584	0.001435	40	0.005222	0.001567	71	0.002858	0.000903	40
1.26186	0.011298	0.002567	583	0.003214	0.001448	166	0.006053	0.001581	40	0.005709	0.001481	40	0.005362	0.001645	71	0.002889	0.001019	40
1.38489	0.012386	0.002807	583	0.003218	0.001459	166	0.006011	0.001353	40	0.005794	0.00156	40	0.005439	0.001659	71	0.002909	0.001144	40
1.51991	0.013577	0.003116	583	0.003215	0.001459	166	0.005963	0.001129	40	0.005849	0.001666	40	0.005447	0.001626	71	0.002916	0.001261	40
1.6681	0.014853	0.003446	583	0.003201	0.001452	166	0.005932	0.00099	40	0.005886	0.00179	40	0.005405	0.001595	71	0.002908	0.001362	40
1.83074	0.016192	0.003743	583	0.003171	0.001437	166	0.005912	0.00098	40	0.005915	0.001908	40	0.005334	0.00159	71	0.002885	0.001438	40
2.00923	0.017608	0.004045	583	0.003119	0.00141	166	0.005893	0.001074	40	0.005948	0.002018	40	0.005236	0.00158	71	0.002847	0.00148	40
2.20513	0.019157	0.004415	583	0.00304	0.001372	166	0.005864	0.001213	40	0.005988	0.002136	40	0.005108	0.001546	71	0.002796	0.001473	40
2.42013	0.0209	0.004806	583	0.002937	0.001332	166	0.005797	0.001308	40	0.006033	0.002284	40	0.004941	0.001491	71	0.002731	0.001406	40
2.65609	0.022899	0.005201	583	0.002812	0.001294	166	0.005673	0.001323	40	0.006056	0.002441	40	0.004737	0.001453	71	0.002652	0.001294	40
2.91505	0.025203	0.005636	583	0.002672	0.001253	166	0.005501	0.001288	40	0.006034	0.002582	40	0.004504	0.001453	71	0.00256	0.00118	40
3.19927	0.027815	0.006072	583	0.00252	0.001204	166	0.0053	0.001252	40	0.005968	0.002777	40	0.004248	0.001477	71	0.002458	0.001107	40
3.51119	0.030674	0.006483	583	0.002363	0.001141	166	0.005079	0.001227	40	0.00587	0.003085	40	0.003973	0.001514	71	0.002347	0.001086	40
3.85353	0.03362	0.006916	583	0.002205	0.001064	166	0.004822	0.001184	40	0.00571	0.003389	40	0.003682	0.001555	71	0.002228	0.001096	40
4.22924	0.036279	0.007519	583	0.002053	0.000977	166	0.004515	0.00113	40	0.005433	0.003502	40	0.003377	0.001562	71	0.0021	0.0011	40
4.64159	0.037934	0.008345	583	0.001912	0.000885	166	0.00416	0.001092	40	0.005014	0.003349	40	0.003061	0.001476	71	0.001965	0.001082	40
5.09414	0.037597	0.008938	583	0.001784	0.000794	166	0.003767	0.001067	40	0.004483	0.002942	40	0.002747	0.001301	71	0.001831	0.001047	40
5.59081	0.034562	0.009203	583	0.001671	0.000713	166	0.003356	0.001041	40	0.003912	0.002387	40	0.002452	0.0011	71	0.001706	0.001007	40
6.13591	0.029038	0.009088	583	0.001573	0.000651	166	0.002935	0.000974	40	0.003373	0.001828	40	0.002188	0.00093	71	0.001596	0.000974	40
6.73415	0.02219	0.008037	583	0.001486	0.000608	166	0.002528	0.000858	40	0.002906	0.001402	40	0.001951	0.000782	71	0.001503	0.000953	40
7.39072	0.015634	0.006096	583	0.001408	0.000578	166	0.002151	0.000718	40	0.002516	0.001129	40	0.001741	0.000664	71	0.001423	0.000945	40
8.11131	0.010546	0.004066	583	0.001336	0.000556	166	0.00182	0.000588	40	0.002194	0.000959	40	0.001555	0.000575	71	0.001354	0.000942	40
8.90215	0.007124	0.002625	583	0.00127	0.00054	166	0.001539	0.000489	40	0.001924	0.000835	40	0.001393	0.000514	71	0.00129	0.000934	40
9.7701	0.004943	0.001787	583	0.001208	0.00053	166	0.001307	0.000422	40	0.001695	0.00073	40	0.001253	0.000475	71	0.001226	0.000915	40
10.7227	0.003537	0.001296	583	0.001149	0.000527	166	0.001117	0.000375	40	0.001495	0.000633	40	0.001131	0.000451	71	0.001159	0.000882	40
11.7681	0.002596	0.000981	583	0.001091	0.00053	166	0.000959	0.000337	40	0.001319	0.000544	40	0.001023	0.000437	71	0.001089	0.000838	40
12.9155	0.001948	0.000765	583	0.001033	0.000536	166	0.000828	0.000303	40	0.001162	0.000467	40	0.000925	0.000424	71	0.001015	0.000788	40
14.1747	0.001497	0.000611	583	0.000973	0.000544	166	0.000718	0.00027	40	0.001023	0.000402	40	0.000834	0.000407	71	0.000938	0.000732	40
15.5568	0.001176	0.000496	583	0.000909	0.000549	166	0.000625	0.000238	40	0.000898	0.00035	40	0.000748	0.000383	71	0.00086	0.00067	40
17.0735	0.00094	0.000406	583	0.000843	0.000544	166	0.000546	0.000208	40	0.000788	0.000306	40	0.000667	0.000353	71	0.000781	0.000603	40
18.7382	0.000763	0.000335	583	0.000773	0.000527	166	0.000477	0.000181	40	0.00069	0.000267	40	0.000591	0.000318	71	0.000703	0.000534	40
20.5651	0.000626	0.000279	583	0.000702	0.000497	166	0.000419	0.000157	40	0.000603	0.000233	40	0.000521	0.000282	71	0.000629	0.000467	40
22.5702	0.00052	0.000234	583	0.000632	0.000457	166	0.000368	0.000138	40	0.000526	0.000201	40	0.000458	0.000248	71	0.000558	0.000404	40
24.7708	0.000436	0.000197	583	0.000564	0.000411	166	0.000323	0.000121	40	0.000459	0.000173	40	0.000401	0.000216	71	0.000494	0.000348	40
27.1859	0.000368	0.000168	583	0.0005	0.000364	166	0.000284	0.000106	40	0.0004	0.000149	40	0.000352	0.000189	71	0.000435	0.000299	40
29.8365	0.000313	0.000144	583	0.000442	0.000319	166	0.000249	9.3e-05	40	0.00035	0.000129	40	0.000308	0.000165	71	0.000384	0.000257	40
32.7455	0.000268	0.000124	583	0.00039	0.000278	166	0.000219	8.3e-05	40	0.000306	0.000112	40	0.00027	0.000144	71	0.000338	0.000222	40
35.9381	0.00023	0.000108	583	0.000343	0.000242	166	0.000193	7.3e-05	40	0.000268	9.8e-05	40	0.000238	0.000126	71	0.000297	0.000192	40
39.4421	0.000199	9.4e-05	583	0.000302	0.000209	166	0.00017	6.5e-05	40	0.000236	8.6e-05	40	0.000209	0.000111	71	0.000262	0.000167	40
43.2876	0.000173	8.2e-05	583	0.000266	0.000181	166	0.00015	5.8e-05	40	0.000207	7.6e-05	40	0.000184	9.7e-05	71	0.000231	0.000145	40
47.5081	0.000151	7.3e-05	583	0.000234	0.000157	166	0.000133	5.2e-05	40	0.000183	6.7e-05	40	0.000163	8.6e-05	71	0.000205	0.000127	40
52.1401	0.000132	6.4e-05	583	0.000207	0.000136	166	0.000117	4.6e-05	40	0.000162	6e-05	40	0.000144	7.6e-05	71	0.000181	0.000111	40
57.2237	0.000115	5.7e-05	583	0.000183	0.000119	166	0.000104	4.1e-05	40	0.000143	5.3e-05	40	0.000128	6.7e-05	71	0.000161	9.8e-05	40
62.8029	0.000102	5e-05	583	0.000162	0.000104	166	9.2e-05	3.7e-05	40	0.000127	4.7e-05	40	0.000113	5.9e-05	71	0.000143	8.7e-05	40
68.9261	9e-05	4.5e-05	583	0.000144	9.1e-05	166	8.2e-05	3.3e-05	40	0.000113	4.2e-05	40	0.000101	5.3e-05	71	0.000127	7.7e-05	40
75.6463	7.9e-05	4e-05	583	0.000128	8e-05	166	7.3e-05	3e-05	40	0.000101	3.8e-05	40	9e-05	4.7e-05	71	0.000114	6.8e-05	40
83.0218	7e-05	3.5e-05	583	0.000114	7e-05	166	6.5e-05	2.7e-05	40	9e-05	3.4e-05	40	8e-05	4.2e-05	71	0.000101	6.1e-05	40
91.1163	6.3e-05	3.2e-05	583	0.000101	6.2e-05	166	5.8e-05	2.4e-05	40	8e-05	3e-05	40	7.2e-05	3.8e-05	71	9.1e-05	5.4e-05	40
100	5.6e-05	2.9e-05	583	9e-05	5.5e-05	166	5.2e-05	2.2e-05	40	7.2e-05	2.7e-05	40	6.4e-05	3.4e-05	71	8.1e-05	4.8e-05	40

## Sheet: FRAP
Norm Fluorescence at 2 minutes
DMSO			Estradiol			Fulvestrant			4OHT			GDC-0810			GDC-0927			AZD9496
0.784287	0.0708274	18	0.468018	0.0684052	18	0.433023	0.0475813	18	0.729807	0.0837866	18	0.576903	0.0982758	18	0.41372	0.0623685	18	0.540381	0.130802	18
0.743357	0.152784	24	0.548138	0.0826331	24	0.451141	0.0656378	24	0.582189	0.092568	24	0.560341	0.049513	24	0.502525	0.0816647	24	0.552474	0.0835489	24
0.80354	0.0820566	24	0.431856	0.334862	24	0.410874	0.109377	24	0.477839	0.0901044	24	0.524644	0.107261	24	0.372452	0.0728462	24	0.451566	0.0785597	24
0.826275	0.101704	24	0.483733	0.140234	24	0.5066	0.133005	24	0.510543	0.0838925	24	0.497798	0.123469	24	0.409082	0.0908876	24	0.527392	0.0897874	24
0.701906	0.0614814	24	0.368951	0.0726523	24	0.424153	0.0811905	24	0.454188	0.0826275	24	0.44777	0.0798726	24	0.386693	0.0857052	24	0.527392	0.0897874	24
0.711245	0.0625326	24	0.436367	0.0858242	24	0.415723	0.0645343	24	0.434602	0.0813384	24	0.427676	0.0521543	24	0.402499	0.0860272	24	0.463235	0.0728816	24

## Sheet: FRAP_raw
	DMSO																								E2																								Fulvestrant
0.023	0.997807	1.00707	0.998919	1.02632	1.0222	1.03631	1.00209	1.02044	0.969365	0.977396	0.972903	1.00506	0.969277	0.996451	0.980281	0.982733	1.03243	0.987162	1.01848	1.01107	1.01427	1.0537	1.0118	1.01502	1.00627	0.999557	1.00342	1.01207	1.02343	0.996853	0.99538	1.00217	1.0144	1.02064	0.985134	1.00285	0.996697	0.995611	0.976561	0.966166	1.02054	1.01798	1.00993	1.03338	1.03042	1.0072	1.02017	1.01437	0.976112
1.002	0.984179	1.02251	1.00884	0.991011	1.01683	0.994814	1.00524	1.01354	0.992511	0.988195	1.00496	0.999412	0.969659	0.993204	1.01631	0.991073	0.9696	0.982652	0.984105	0.98751	0.98518	0.97607	0.998384	0.979399	0.991979	0.984918	0.980484	0.985228	0.957233	0.974153	0.982685	1.0165	1.01224	1.02585	0.961893	0.987663	0.991355	1.04116	1.00477	1.00319	0.994552	0.995624	0.99927	0.981993	0.998726	1.00326	0.992788	0.99706	1.00722
2.003	0.987611	0.996637	1.00554	1.02089	0.999885	0.991419	1.01833	1.0161	0.976301	0.984816	0.983188	1.01298	0.980826	1.00464	1.0112	1.00142	0.981143	0.968001	0.970258	0.990045	0.980803	0.987033	0.982339	0.9833	0.98704	0.992541	0.993223	0.993084	1.00842	0.989813	0.992642	1.01588	1.02274	0.989688	1.02309	1.03052	1.03603	1.00574	1.01834	1.01675	1.01051	0.988317	0.988528	0.989965	0.992054	1.01794	1.00004	0.997792	0.999241
3.003	1.00762	1.00684	1.02254	1.02312	0.980507	1.00605	1.013	1.01461	0.991185	0.999807	1.01371	1.00864	1.00747	0.996776	0.991446	1.00099	0.99635	0.966919	0.976791	0.974652	0.980893	0.981568	0.987916	0.987505	1.01085	1.0082	1.00794	1.00784	0.985153	1.00856	1.01464	0.981671	1.01114	1.01052	1.00048	1.01641	0.998308	1.01114	1.02082	1.00011	1.00226	0.99473	0.985609	1.01231	0.985351	0.986861	0.980252	0.988787	0.98548
4.003	0.998507	0.995086	0.980864	1.01899	1.00842	0.993511	0.976853	0.987689	0.982394	0.99596	1.01057	0.97977	0.998019	0.984818	1.01054	1.00201	0.994272	1.01181	1.01028	0.986232	0.993547	0.99274	1.00846	0.998906	0.986128	0.998906	0.998209	1.003	0.968878	0.989771	0.994973	0.96417	1.00813	1.00807	1.01523	1.00649	0.979642	1.00452	1.01332	1.02894	0.999257	1.00271	0.993443	0.992513	1.00588	0.995889	1.00083	0.996687	1.00126
5.003	1.00448	0.974361	0.992587	1.0007	1.00127	0.997325	0.996503	0.994995	1.00237	0.986209	0.984833	0.974817	0.986543	0.979835	0.98431	0.983845	0.991192	1.02024	1.00561	0.994323	0.989318	0.993888	1.00777	0.99188	1.00095	1.00295	1.00805	0.990752	1.00326	1.00361	1.00161	1.01555	0.993303	0.988981	1.00648	0.980104	0.991365	0.984909	0.991993	1.00594	0.980103	0.98578	0.992276	0.978464	0.983225	0.991302	0.988359	0.992639	0.986183
6.003	1.00345	1.01175	1.02306	0.992686	1.00089	1.01549	1.02487	1.00778	1.01053	1.01582	1.00243	0.981758	1.02183	0.995154	1.00517	1.00205	1.00775	1.01008	1.02199	1.03619	1.0142	1.016	1.01067	1.02451	0.995442	0.992349	0.996033	0.995061	1.00499	0.995653	0.982815	1.01167	0.972084	0.968622	0.998369	0.95275	1.00205	0.98074	0.983546	1.00014	0.989341	0.995403	0.998482	0.991894	1.00365	0.992185	1.00886	0.991735	1.02877
7.003	1.01512	0.992449	0.998599	1.00277	1.00582	0.99146	1.01252	0.993708	1.01192	1.03403	1.01958	1.01869	1.01488	1.02482	0.998848	1.01774	0.996418	1.0211	1.01174	0.999828	1.02175	0.981533	0.993814	0.98773	1.00492	0.987358	0.989058	0.994812	1.00661	1.00422	1.00673	0.985864	0.994374	1.01348	1.00338	1.03839	0.995567	0.987711	0.984784	1.00432	1.00832	1.0048	1.00497	0.987417	0.999805	0.988873	1.00464	0.990525	0.997752
8.003	0.985529	0.986976	0.972312	0.95674	0.977677	0.965712	0.978396	0.976279	1.04598	1.01774	1.00922	1.01115	1.01413	1.01616	1.00355	1.0013	1.0007	1.01782	0.983709	1.0025	0.989724	0.989086	0.990328	1.00011	0.990004	0.977987	1.00023	0.99789	1.00814	1.004	0.995379	1.02573	0.983138	0.98623	1.00509	0.998986	1.02205	1.0038	1.00974	1.00037	0.993	1.01187	1.01509	1.01651	1.01342	1.00728	0.999679	1.01299	1.00451
9.003	1.00116	0.989667	0.993224	0.976651	0.99601	0.987875	0.986307	0.968826	1.01964	1.00161	0.999944	1.00821	1.03955	1.00905	0.998903	1.01791	1.03226	1.01672	1.01961	1.01995	1.03297	1.03071	1.00972	1.03406	1.02133	1.0482	1.01121	1.01226	1.00953	1.01014	1.0301	1.00605	0.989212	0.988114	1.00138	0.986904	0.987391	0.985395	0.997274	0.975173	1.00231	1.00328	1.01308	1.01626	0.987946	1.0097	1.00479	1.01812	1.01284
10.003	1.01457	1.01751	1.00457	0.992158	0.991161	1.0211	0.987015	1.00748	0.987122	0.986991	0.9971	1.01551	0.984941	0.986197	0.998136	0.971475	0.992687	0.988481	0.988599	0.973916	1.00302	0.981182	0.990148	0.979211	1.00604	1.00852	1.01313	1.00869	1.02564	1.02463	1.0044	0.974296	0.994008	0.990728	0.994122	1.01734	0.994566	1.00139	1.00972	1.00838	0.975967	0.985864	0.989876	1.0014	1.00103	1.0064	0.996801	0.989873	1.00283
10.437	0.577266	0.523489	0.490305	0.415939	0.404902	0.454068	0.422791	0.428425	0.436945	0.398207	0.429239	0.362385	0.416507	0.41598	0.407313	0.404437	0.355749	0.364689	0.342474	0.504829	0.326673	0.39727	0.303398	0.302449	0.272793	0.298937	0.260373	0.270448	0.310613	0.280304	0.24191	0.340192	0.337192	0.484516	0.462021	0.328662	0.373952	0.356352	0.358933	0.403045	0.36236	0.300452	0.290487	0.260584	0.337328	0.314254	0.264008	0.403078	0.317133
10.638	0.518819	0.452854	0.464163	0.39328	0.403837	0.429784	0.394642	0.373893	0.397873	0.330473	0.36228	0.361161	0.370243	0.37149	0.391809	0.369884	0.275919	0.336576	0.340571	0.479067	0.306065	0.378552	0.305866	0.297566	0.218255	0.246845	0.215151	0.235411	0.239623	0.231308	0.178563	0.288654	0.277534	0.438191	0.428887	0.278413	0.295861	0.3218	0.266115	0.321271	0.306216	0.262168	0.264935	0.206855	0.297226	0.282174	0.208803	0.354626	0.279382
10.838	0.547287	0.466552	0.488831	0.423359	0.42095	0.47941	0.412174	0.428194	0.438748	0.373658	0.396131	0.386923	0.40737	0.404228	0.426335	0.38734	0.33805	0.345634	0.346628	0.492352	0.337569	0.408871	0.312489	0.332468	0.233927	0.262121	0.226983	0.246412	0.273242	0.238632	0.194446	0.300882	0.289087	0.455212	0.43115	0.306778	0.298438	0.334939	0.300538	0.350136	0.310322	0.27056	0.267799	0.205648	0.289388	0.283414	0.19706	0.365793	0.281792
11.038	0.549765	0.457051	0.502623	0.450989	0.427879	0.490413	0.45954	0.451282	0.429724	0.381322	0.414652	0.3865	0.42553	0.415347	0.442096	0.403455	0.373262	0.393454	0.369907	0.509232	0.361554	0.443072	0.338989	0.384631	0.236923	0.285343	0.231606	0.242811	0.253992	0.244745	0.194247	0.295082	0.28711	0.447289	0.432748	0.302398	0.319089	0.321986	0.294762	0.340467	0.316363	0.269252	0.267062	0.223501	0.296582	0.283284	0.211472	0.365673	0.272301
11.238	0.561478	0.470889	0.503842	0.451015	0.460674	0.512438	0.45002	0.453649	0.469626	0.420522	0.438937	0.441702	0.4539	0.431384	0.45844	0.429299	0.366704	0.42997	0.37964	0.531631	0.354271	0.471437	0.354563	0.379469	0.228822	0.274531	0.230916	0.246574	0.257177	0.240032	0.185756	0.290196	0.28147	0.465404	0.440689	0.300527	0.30479	0.321062	0.277937	0.324392	0.330483	0.265955	0.275597	0.220382	0.296332	0.282579	0.22588	0.381167	0.271946
11.438	0.567228	0.511306	0.533518	0.452964	0.477767	0.554278	0.470372	0.480132	0.446894	0.427259	0.453706	0.450806	0.452179	0.436468	0.488835	0.431159	0.395687	0.404134	0.387709	0.527415	0.375066	0.460714	0.358771	0.410886	0.232249	0.273159	0.235452	0.250352	0.229765	0.246671	0.202339	0.284156	0.29461	0.453735	0.433819	0.312347	0.310424	0.313374	0.29445	0.346761	0.326075	0.265421	0.272256	0.217882	0.30047	0.286217	0.213186	0.373546	0.278877
11.638	0.578681	0.499308	0.552635	0.450227	0.489017	0.547773	0.485093	0.500147	0.476093	0.45966	0.44615	0.475196	0.490935	0.462263	0.491693	0.445582	0.351588	0.42894	0.406713	0.55502	0.385668	0.480225	0.400315	0.444761	0.230451	0.267879	0.238089	0.24915	0.225272	0.242035	0.197352	0.315595	0.293464	0.442314	0.430381	0.292305	0.314596	0.326656	0.303133	0.339761	0.325039	0.270016	0.283815	0.230351	0.302435	0.296703	0.2199	0.375783	0.283372
11.838	0.607039	0.524092	0.545124	0.463569	0.472419	0.5416	0.487348	0.499605	0.482567	0.470145	0.482328	0.499435	0.482976	0.467286	0.517979	0.442102	0.40172	0.442298	0.416302	0.562101	0.413564	0.530998	0.390488	0.459641	0.231667	0.271428	0.247884	0.24342	0.261842	0.250755	0.204995	0.30618	0.29746	0.481623	0.453772	0.334177	0.338589	0.320741	0.301733	0.335496	0.327866	0.277138	0.27975	0.241051	0.322755	0.294419	0.228991	0.378739	0.285867
12.038	0.608357	0.544721	0.582307	0.477201	0.51425	0.552664	0.525025	0.521013	0.4824	0.463078	0.486027	0.494962	0.525434	0.483123	0.530832	0.461801	0.415116	0.460805	0.425895	0.58351	0.408328	0.529604	0.404447	0.495562	0.239082	0.281438	0.250142	0.254165	0.263675	0.243755	0.202694	0.308724	0.293381	0.453387	0.435122	0.286701	0.320458	0.337558	0.305665	0.325571	0.32533	0.278055	0.28462	0.243443	0.304093	0.305352	0.234151	0.380345	0.290381
12.238	0.588192	0.552937	0.55654	0.475395	0.48908	0.578156	0.515325	0.507001	0.487189	0.488674	0.491698	0.496343	0.50943	0.492639	0.546746	0.480706	0.428437	0.475078	0.425418	0.58839	0.406954	0.552367	0.416006	0.48893	0.233936	0.279568	0.253869	0.243839	0.221679	0.242919	0.210279	0.309556	0.301379	0.461656	0.461226	0.322484	0.336125	0.333865	0.313923	0.340307	0.329506	0.277072	0.283558	0.23313	0.319033	0.302912	0.236469	0.390808	0.300699
12.438	0.624413	0.56548	0.576634	0.499698	0.511479	0.591414	0.534118	0.546842	0.497416	0.507336	0.492869	0.510677	0.529468	0.507477	0.555989	0.477987	0.431184	0.460839	0.434494	0.600588	0.434186	0.531195	0.427085	0.491242	0.243636	0.296938	0.253917	0.255745	0.250702	0.253909	0.213662	0.313017	0.294219	0.455925	0.452671	0.302816	0.311959	0.330141	0.304668	0.344813	0.33057	0.286417	0.284057	0.230412	0.323376	0.303649	0.246127	0.381225	0.292149
12.638	0.625758	0.571975	0.561892	0.508457	0.527899	0.581219	0.565149	0.564463	0.515032	0.520475	0.512427	0.499095	0.564754	0.496124	0.546555	0.473394	0.459193	0.503847	0.425044	0.595139	0.438677	0.563696	0.449547	0.515011	0.234508	0.32059	0.260833	0.26003	0.246719	0.241936	0.211657	0.331391	0.29738	0.480538	0.46598	0.289781	0.323439	0.346299	0.307092	0.342963	0.333458	0.283435	0.29178	0.243311	0.340981	0.314269	0.240315	0.382932	0.29734
12.838	0.603768	0.566082	0.578433	0.471915	0.499552	0.572876	0.540574	0.551622	0.512769	0.510386	0.48484	0.519799	0.535662	0.499423	0.546564	0.48208	0.480357	0.516711	0.447306	0.60432	0.438878	0.598313	0.456309	0.553532	0.245934	0.293198	0.266711	0.251741	0.274794	0.25776	0.217378	0.324186	0.3068	0.465436	0.462952	0.325812	0.324091	0.345055	0.315841	0.345254	0.33293	0.28848	0.287163	0.24821	0.331304	0.302397	0.237872	0.390747	0.300855
13.038	0.628071	0.585203	0.598108	0.482581	0.506983	0.588962	0.53042	0.564711	0.515042	0.516189	0.49809	0.497111	0.562261	0.493535	0.550177	0.474977	0.468385	0.504187	0.435491	0.59035	0.433214	0.559615	0.425577	0.520197	0.247217	0.316355	0.259027	0.25291	0.279956	0.255285	0.218039	0.315189	0.303024	0.459283	0.469923	0.328458	0.310677	0.340753	0.312962	0.342886	0.331169	0.29262	0.293481	0.239674	0.334307	0.297319	0.233973	0.388714	0.299856
13.238	0.645489	0.594568	0.600848	0.525465	0.518102	0.603621	0.547381	0.572396	0.514086	0.542659	0.532502	0.52722	0.578003	0.497986	0.561181	0.504995	0.490287	0.51125	0.455596	0.620263	0.436701	0.579653	0.447839	0.566657	0.250649	0.310253	0.269658	0.261517	0.267046	0.254893	0.223485	0.348002	0.293884	0.459863	0.458438	0.309702	0.329005	0.343306	0.307502	0.339448	0.342209	0.295073	0.29629	0.249742	0.326227	0.311459	0.252895	0.396358	0.301783
13.438	0.634632	0.60121	0.571065	0.513836	0.530763	0.611223	0.539842	0.592863	0.524046	0.544103	0.519931	0.504952	0.596003	0.530602	0.582665	0.5144	0.459715	0.492396	0.454724	0.598539	0.453933	0.572632	0.431523	0.550768	0.2455	0.301687	0.265635	0.261796	0.237203	0.259739	0.222137	0.315842	0.310582	0.456623	0.461359	0.289252	0.344893	0.320449	0.315422	0.338872	0.336036	0.290342	0.291866	0.246018	0.340158	0.323528	0.252269	0.386472	0.294794
13.638	0.652235	0.618647	0.603565	0.522609	0.522543	0.618462	0.583379	0.58322	0.537618	0.553125	0.53069	0.53019	0.597619	0.512665	0.570408	0.509148	0.501421	0.528327	0.462697	0.637444	0.483198	0.601161	0.455975	0.592667	0.238124	0.306756	0.267268	0.253649	0.264172	0.249861	0.214262	0.316741	0.303168	0.450913	0.449966	0.295091	0.330143	0.303572	0.328572	0.308346	0.343187	0.295026	0.298297	0.259831	0.337821	0.314752	0.267021	0.396109	0.297221
13.838	0.657037	0.612522	0.600191	0.515922	0.531255	0.638127	0.569126	0.579704	0.543985	0.526338	0.559693	0.539325	0.606315	0.546527	0.582823	0.520904	0.468183	0.493576	0.459775	0.630974	0.454235	0.577543	0.441985	0.57007	0.244798	0.314975	0.279098	0.265421	0.251586	0.266574	0.222547	0.314069	0.305977	0.477151	0.462531	0.316489	0.322123	0.329523	0.355774	0.331316	0.327684	0.290138	0.294809	0.245527	0.323202	0.305563	0.236595	0.391228	0.300814
14.038	0.6433	0.620592	0.598278	0.523535	0.54294	0.610758	0.560516	0.604737	0.53041	0.555175	0.547758	0.552192	0.619121	0.524328	0.584249	0.515627	0.468115	0.502869	0.45491	0.616345	0.458722	0.588323	0.460093	0.58047	0.232927	0.29875	0.271422	0.256129	0.259811	0.257681	0.213627	0.330199	0.310032	0.449153	0.4682	0.293925	0.302306	0.336459	0.305566	0.345456	0.330542	0.294437	0.293049	0.257943	0.346903	0.32273	0.244441	0.384285	0.292053
14.238	0.645241	0.628357	0.613609	0.519047	0.540322	0.642523	0.57571	0.610985	0.566573	0.574438	0.544912	0.560164	0.628441	0.54438	0.588667	0.541033	0.485734	0.523239	0.462065	0.613896	0.46268	0.589106	0.460981	0.588792	0.247898	0.308646	0.280557	0.257933	0.266986	0.257666	0.216507	0.338542	0.314576	0.463432	0.466804	0.322491	0.319277	0.342662	0.319858	0.3445	0.336801	0.298141	0.303316	0.25844	0.345027	0.312067	0.247948	0.400765	0.29715
14.438	0.635692	0.623658	0.618945	0.517999	0.554672	0.654854	0.566013	0.622159	0.546164	0.551125	0.549891	0.553691	0.608736	0.538343	0.589861	0.52814	0.522729	0.552234	0.489411	0.630728	0.487082	0.636358	0.482537	0.633012	0.244118	0.303927	0.27225	0.26054	0.263383	0.254946	0.22521	0.315244	0.304068	0.454347	0.444031	0.323427	0.301536	0.322984	0.324313	0.335196	0.345492	0.301354	0.299189	0.254404	0.341459	0.325311	0.260541	0.395339	0.304931
14.638	0.666358	0.648548	0.609509	0.528725	0.531928	0.656967	0.572417	0.622601	0.558196	0.550664	0.534049	0.542665	0.605378	0.548169	0.595413	0.530983	0.48165	0.526332	0.487389	0.632855	0.484418	0.618433	0.496023	0.605939	0.251859	0.29487	0.282927	0.266473	0.285524	0.263137	0.234541	0.335647	0.320237	0.471366	0.454775	0.317397	0.31922	0.323252	0.3234	0.339843	0.350434	0.302862	0.308222	0.258439	0.346278	0.311373	0.255638	0.388306	0.298288
14.838	0.673675	0.650233	0.599548	0.494722	0.524304	0.641956	0.581094	0.626372	0.549119	0.558192	0.55416	0.577124	0.634613	0.567307	0.595377	0.546711	0.48267	0.548999	0.480609	0.645005	0.496468	0.622268	0.478162	0.614819	0.242501	0.296475	0.277741	0.26451	0.254001	0.250757	0.226232	0.331501	0.327872	0.464424	0.476501	0.302668	0.335292	0.335785	0.332686	0.358145	0.327213	0.300066	0.304263	0.264042	0.343719	0.313477	0.260458	0.381451	0.299423
15.038	0.651283	0.667793	0.611276	0.513807	0.545612	0.633493	0.586589	0.643407	0.554233	0.549097	0.54439	0.558866	0.622171	0.558777	0.596643	0.538616	0.517139	0.534411	0.465237	0.633542	0.484236	0.598572	0.475569	0.618594	0.239428	0.305592	0.276813	0.260791	0.272985	0.258136	0.21972	0.316917	0.318382	0.469418	0.445714	0.305905	0.352156	0.351342	0.325307	0.355008	0.348861	0.309301	0.303931	0.26205	0.360892	0.321223	0.267162	0.404192	0.302029
15.239	0.672388	0.651461	0.611928	0.509162	0.553349	0.637988	0.574484	0.628994	0.556233	0.556622	0.543721	0.585767	0.630044	0.571199	0.602912	0.554088	0.530807	0.538329	0.469674	0.656422	0.490007	0.629344	0.487594	0.625247	0.244939	0.312582	0.289546	0.261079	0.274843	0.262713	0.226722	0.334731	0.319228	0.456908	0.460009	0.313267	0.339679	0.338834	0.372283	0.359015	0.342795	0.304872	0.294996	0.266508	0.345435	0.314194	0.255331	0.403865	0.305187
15.438	0.645919	0.638206	0.601993	0.524844	0.558794	0.637237	0.576521	0.630853	0.560137	0.568277	0.559866	0.571253	0.618469	0.546071	0.584536	0.534589	0.526028	0.536385	0.476026	0.650103	0.478966	0.611747	0.491589	0.624382	0.246349	0.317307	0.296669	0.267168	0.257139	0.253797	0.218205	0.347294	0.31295	0.471745	0.475479	0.348496	0.340984	0.333018	0.319215	0.350984	0.335331	0.301197	0.300697	0.268671	0.346156	0.308216	0.25059	0.396599	0.310034
15.638	0.668317	0.637379	0.596415	0.523239	0.545498	0.657181	0.578353	0.624895	0.586026	0.601216	0.560559	0.604962	0.620094	0.561638	0.622179	0.559276	0.532974	0.568266	0.492627	0.654733	0.500872	0.645509	0.492119	0.637386	0.249842	0.324488	0.296861	0.262929	0.26915	0.26927	0.227396	0.346362	0.306022	0.461191	0.469285	0.293783	0.337005	0.348747	0.313108	0.338955	0.339716	0.297716	0.295607	0.253485	0.370463	0.305157	0.255737	0.395476	0.30844
15.839	0.656033	0.623225	0.615171	0.551586	0.540113	0.654667	0.579504	0.622383	0.574918	0.606919	0.582103	0.573957	0.633325	0.576205	0.620365	0.547841	0.539016	0.534418	0.488996	0.651049	0.50782	0.602704	0.501261	0.631447	0.244624	0.321085	0.297572	0.268316	0.264936	0.279792	0.224519	0.35522	0.307108	0.457719	0.43967	0.332575	0.320444	0.352782	0.329775	0.321297	0.357828	0.29753	0.298506	0.280557	0.340388	0.316887	0.264558	0.398738	0.296382
16.038	0.689953	0.661527	0.619268	0.555966	0.573788	0.681451	0.604283	0.642498	0.570243	0.581804	0.569127	0.578718	0.625948	0.558316	0.611222	0.541304	0.544529	0.553692	0.487195	0.648063	0.516657	0.63536	0.500393	0.627873	0.245472	0.315875	0.296642	0.261559	0.284288	0.263624	0.224091	0.326823	0.314557	0.451365	0.453065	0.31071	0.313532	0.361962	0.345862	0.333205	0.332538	0.307497	0.303462	0.267903	0.338964	0.324778	0.261257	0.392812	0.299814
16.238	0.669158	0.639063	0.608131	0.546215	0.564378	0.662714	0.58173	0.630903	0.563775	0.564535	0.567741	0.557605	0.645423	0.542	0.617356	0.533404	0.500478	0.543618	0.486477	0.644712	0.490761	0.60811	0.490658	0.633073	0.248752	0.331238	0.295631	0.264491	0.287689	0.26067	0.229048	0.326177	0.315978	0.445309	0.477082	0.324235	0.348387	0.345724	0.337865	0.348246	0.340075	0.298474	0.306379	0.279584	0.350801	0.315366	0.279716	0.396291	0.307321
16.439	0.66386	0.640861	0.615515	0.560318	0.558015	0.675466	0.602149	0.649049	0.571692	0.584562	0.57721	0.562102	0.632974	0.547995	0.612381	0.543296	0.527159	0.577643	0.496958	0.664203	0.49512	0.615654	0.515265	0.648749	0.241753	0.300293	0.293787	0.264813	0.247707	0.249575	0.221505	0.327032	0.303581	0.448457	0.46895	0.308431	0.32916	0.343414	0.334314	0.309413	0.345196	0.302291	0.303823	0.266542	0.356551	0.312967	0.263371	0.398887	0.307484
16.638	0.690602	0.656848	0.626455	0.537998	0.55069	0.64484	0.593862	0.623387	0.564269	0.590837	0.589979	0.582931	0.621312	0.554927	0.587996	0.539926	0.52858	0.557846	0.502202	0.670641	0.518292	0.623758	0.506537	0.650894	0.25718	0.326891	0.308727	0.263132	0.264738	0.270829	0.232068	0.356827	0.315345	0.464313	0.438985	0.318734	0.313595	0.331971	0.326233	0.346014	0.348316	0.309875	0.301911	0.275916	0.347373	0.313568	0.270278	0.394875	0.308409
16.838	0.660794	0.656836	0.62431	0.535378	0.554514	0.685673	0.597495	0.659653	0.562817	0.58654	0.596235	0.609676	0.639455	0.557384	0.60009	0.540237	0.524058	0.569859	0.497733	0.646968	0.514226	0.618154	0.511234	0.644315	0.252032	0.308094	0.298884	0.271385	0.289482	0.259857	0.210325	0.344801	0.308227	0.44621	0.458176	0.310158	0.331474	0.342491	0.302977	0.32281	0.340948	0.297037	0.304959	0.271918	0.345042	0.319795	0.261316	0.385344	0.305393
17.038	0.642706	0.649151	0.615694	0.544686	0.554355	0.645795	0.596976	0.64294	0.580355	0.57887	0.59718	0.602639	0.644652	0.546103	0.609374	0.539415	0.535627	0.555182	0.482667	0.644981	0.500709	0.631193	0.503527	0.664444	0.239441	0.317916	0.301494	0.266196	0.262235	0.274469	0.220313	0.345322	0.318991	0.46458	0.453787	0.298689	0.337196	0.340288	0.319158	0.345732	0.335659	0.301936	0.304544	0.256983	0.353735	0.304779	0.267418	0.407505	0.311216
17.238	0.65229	0.612901	0.610591	0.554203	0.53744	0.645919	0.589755	0.64294	0.581897	0.622356	0.60016	0.61401	0.654731	0.580885	0.632553	0.556021	0.554477	0.553375	0.504655	0.655597	0.521836	0.635178	0.522977	0.656735	0.2453	0.304542	0.296027	0.27069	0.280105	0.253563	0.225011	0.356116	0.319657	0.464713	0.455095	0.297432	0.330265	0.308967	0.323201	0.358825	0.326636	0.297697	0.307175	0.271429	0.35481	0.312065	0.253554	0.386974	0.309414
17.438	0.661035	0.66437	0.62745	0.550289	0.56528	0.660133	0.59627	0.654142	0.571423	0.624607	0.590271	0.583011	0.641448	0.561636	0.609848	0.544341	0.527539	0.562916	0.497075	0.669641	0.508784	0.63354	0.513752	0.66359	0.248994	0.311525	0.30356	0.2747	0.287716	0.273797	0.236894	0.366883	0.314476	0.463934	0.470737	0.308494	0.321417	0.330537	0.306662	0.335152	0.352642	0.303274	0.309271	0.263121	0.352761	0.322914	0.276319	0.398332	0.299769
17.638	0.680335	0.636656	0.603	0.570719	0.548968	0.650068	0.612859	0.645378	0.586647	0.603875	0.568651	0.622591	0.650083	0.573457	0.615231	0.550324	0.523229	0.575797	0.497976	0.666553	0.525608	0.635986	0.51261	0.678513	0.249844	0.322436	0.304133	0.276407	0.27035	0.266451	0.226397	0.352694	0.30948	0.431459	0.45173	0.300526	0.324413	0.332283	0.326319	0.339799	0.341056	0.312347	0.309685	0.278311	0.351338	0.329674	0.278424	0.403004	0.30755
17.838	0.652965	0.64989	0.630869	0.554528	0.552852	0.651021	0.596874	0.658046	0.607569	0.630088	0.619292	0.644457	0.677962	0.587941	0.63264	0.568382	0.554068	0.575914	0.495317	0.677311	0.527557	0.649289	0.517228	0.674808	0.24827	0.321051	0.311383	0.272539	0.294939	0.262569	0.22124	0.338991	0.329093	0.448929	0.474055	0.319083	0.315972	0.328235	0.332272	0.336879	0.347185	0.313785	0.312085	0.268418	0.349385	0.326456	0.281675	0.402691	0.303082
18.038	0.640485	0.674982	0.636328	0.546103	0.576442	0.676431	0.60807	0.666296	0.593269	0.623645	0.615158	0.610451	0.680423	0.562774	0.63875	0.563772	0.516474	0.55284	0.495785	0.64959	0.505026	0.639797	0.50175	0.66035	0.254821	0.32433	0.310493	0.278721	0.26123	0.261521	0.225286	0.33194	0.309953	0.453517	0.471387	0.321282	0.32831	0.337286	0.309438	0.354371	0.344148	0.306883	0.307831	0.274889	0.359736	0.330491	0.285055	0.385214	0.299795
18.238	0.653304	0.656024	0.644286	0.548833	0.561744	0.686142	0.595333	0.661421	0.588569	0.628023	0.595153	0.595576	0.679589	0.577148	0.628161	0.562435	0.518098	0.57899	0.513434	0.680898	0.515388	0.623622	0.524868	0.662448	0.244949	0.334869	0.306608	0.281502	0.231214	0.269142	0.225472	0.346894	0.31593	0.44209	0.452518	0.319534	0.327686	0.35768	0.345643	0.332841	0.360078	0.301406	0.303754	0.280331	0.366142	0.324048	0.283477	0.391636	0.303411
18.438	0.690807	0.687615	0.651633	0.584695	0.571394	0.664034	0.619546	0.690059	0.578627	0.628565	0.596171	0.657108	0.674539	0.59028	0.623293	0.567374	0.576526	0.585939	0.513223	0.698314	0.53215	0.65399	0.531544	0.70626	0.253138	0.33473	0.319617	0.273393	0.278999	0.265567	0.217338	0.340507	0.317026	0.45639	0.480183	0.280929	0.343683	0.339799	0.315967	0.338126	0.352576	0.309905	0.302885	0.275106	0.381608	0.315	0.285989	0.395756	0.301491
18.638	0.67406	0.662621	0.637761	0.578997	0.574971	0.679609	0.615311	0.68976	0.599351	0.629787	0.581743	0.603903	0.659875	0.59827	0.623566	0.566764	0.574629	0.555115	0.505455	0.684244	0.535863	0.631758	0.514139	0.699693	0.253652	0.31803	0.312904	0.275919	0.283915	0.263155	0.234253	0.322925	0.30863	0.43751	0.464376	0.301043	0.342014	0.355146	0.318986	0.338934	0.353271	0.309126	0.307475	0.28963	0.385171	0.318857	0.285726	0.401	0.311318
18.838	0.707921	0.662941	0.636948	0.561218	0.578076	0.689637	0.613961	0.660979	0.574404	0.644659	0.626803	0.634424	0.669382	0.600455	0.626938	0.564936	0.547428	0.580934	0.514439	0.695404	0.52303	0.628717	0.522327	0.706154	0.254538	0.331843	0.31875	0.271995	0.27361	0.266769	0.237325	0.337211	0.318601	0.456799	0.474865	0.298005	0.347804	0.33655	0.308008	0.336402	0.374369	0.312043	0.301486	0.2776	0.379478	0.317857	0.26835	0.399162	0.296857
19.038	0.677022	0.654775	0.631376	0.540731	0.555288	0.664034	0.607592	0.664707	0.594256	0.649601	0.620948	0.63238	0.686569	0.603187	0.639969	0.5788	0.53368	0.590406	0.506831	0.701299	0.547562	0.622562	0.532128	0.700011	0.252582	0.332176	0.30948	0.270001	0.23806	0.262547	0.244666	0.338993	0.324569	0.456008	0.492277	0.293527	0.350284	0.346034	0.30022	0.325184	0.365192	0.308579	0.309364	0.285367	0.369731	0.340644	0.298781	0.39856	0.308372
19.238	0.687418	0.678464	0.656241	0.556682	0.574761	0.673021	0.628218	0.669218	0.593681	0.647692	0.601749	0.619969	0.67144	0.574763	0.603533	0.55561	0.542265	0.581326	0.509394	0.680056	0.537628	0.63421	0.532285	0.696281	0.262853	0.343933	0.320301	0.27542	0.293771	0.263292	0.23296	0.339166	0.31684	0.446684	0.448203	0.304613	0.341118	0.36105	0.321978	0.337709	0.347458	0.306053	0.309089	0.289718	0.368654	0.309398	0.283326	0.402452	0.295849
19.438	0.686534	0.686534	0.647714	0.565406	0.559975	0.673638	0.600686	0.663599	0.592254	0.64667	0.585642	0.633313	0.650081	0.594044	0.619059	0.572016	0.54348	0.577066	0.513396	0.698722	0.538598	0.644406	0.517376	0.702522	0.259578	0.32481	0.31758	0.276594	0.258266	0.256105	0.233814	0.325181	0.321565	0.443932	0.467359	0.302238	0.325357	0.366129	0.316426	0.348373	0.364264	0.31114	0.31447	0.283339	0.369357	0.31575	0.287243	0.404863	0.304899
19.638	0.671972	0.702074	0.652125	0.553747	0.561098	0.676022	0.610282	0.673681	0.572067	0.650588	0.594997	0.641077	0.653041	0.551801	0.622292	0.562233	0.533379	0.575789	0.508068	0.671755	0.533484	0.613333	0.506825	0.697866	0.257146	0.338813	0.323516	0.274213	0.254252	0.256347	0.236807	0.356179	0.324458	0.461723	0.457058	0.295057	0.345794	0.359027	0.310447	0.336203	0.365268	0.312365	0.314123	0.297235	0.383365	0.325059	0.293182	0.409099	0.31015
19.838	0.685099	0.683157	0.624847	0.544265	0.568166	0.672697	0.579412	0.675987	0.572969	0.612623	0.586205	0.612796	0.638575	0.551535	0.607531	0.558427	0.537896	0.585151	0.499463	0.664135	0.519187	0.636577	0.509455	0.692256	0.254949	0.310014	0.313274	0.272155	0.277498	0.266175	0.22399	0.343734	0.318562	0.451687	0.452245	0.289182	0.326649	0.339337	0.312947	0.340294	0.361304	0.316037	0.320156	0.288408	0.376302	0.307875	0.273132	0.395013	0.311323
20.038	0.673783	0.696698	0.676529	0.545166	0.593173	0.658262	0.589783	0.660377	0.606272	0.645423	0.621249	0.623586	0.683595	0.589149	0.62088	0.580627	0.524941	0.584839	0.511246	0.688451	0.539252	0.658577	0.530358	0.7242	0.252855	0.323153	0.32635	0.272414	0.274096	0.272201	0.229916	0.322421	0.310536	0.447314	0.47561	0.29594	0.319593	0.349438	0.324252	0.343158	0.358931	0.312137	0.315597	0.278694	0.368565	0.333732	0.29366	0.403201	0.304252
20.238	0.687285	0.69005	0.651474	0.548684	0.570719	0.670533	0.599392	0.672793	0.590562	0.632444	0.610322	0.645636	0.682321	0.596903	0.613909	0.58505	0.544363	0.577088	0.505366	0.685551	0.51919	0.655173	0.52978	0.710112	0.259038	0.321211	0.325182	0.270485	0.246774	0.267831	0.23066	0.356859	0.310407	0.435321	0.465653	0.294848	0.326986	0.32588	0.322593	0.315265	0.367183	0.318466	0.320641	0.283464	0.374966	0.328905	0.289988	0.405842	0.303439
20.438	0.686983	0.69574	0.659103	0.53976	0.566429	0.693473	0.616077	0.682961	0.585078	0.645959	0.628326	0.629521	0.660905	0.574642	0.620653	0.584215	0.556094	0.592393	0.511719	0.68871	0.54277	0.656315	0.527056	0.695942	0.266621	0.31581	0.330238	0.27208	0.274417	0.269084	0.229858	0.361308	0.324476	0.432092	0.480368	0.325017	0.340832	0.342352	0.328205	0.319224	0.359795	0.313075	0.306886	0.275986	0.385946	0.319713	0.27488	0.394713	0.313234
20.638	0.683753	0.675589	0.633778	0.525604	0.563429	0.652559	0.590724	0.677748	0.607813	0.670458	0.650551	0.649585	0.678724	0.598938	0.63165	0.603689	0.549638	0.576597	0.50315	0.674562	0.534015	0.648312	0.512471	0.700165	0.258258	0.323747	0.331794	0.276533	0.269033	0.263417	0.232845	0.367763	0.318681	0.445363	0.457097	0.291843	0.32507	0.323005	0.330413	0.331162	0.359349	0.312263	0.309591	0.28077	0.385557	0.334687	0.297937	0.401534	0.307846
20.839	0.661743	0.691285	0.649586	0.568528	0.55835	0.682526	0.595965	0.68601	0.603519	0.668266	0.63852	0.629152	0.655566	0.584023	0.612277	0.575633	0.55406	0.618848	0.524761	0.719385	0.531412	0.64691	0.524241	0.708533	0.266445	0.334704	0.332289	0.275619	0.300829	0.273438	0.231433	0.362517	0.320114	0.444442	0.449637	0.315305	0.337755	0.332135	0.348279	0.352872	0.360572	0.321658	0.31598	0.280739	0.383116	0.327312	0.294174	0.407195	0.307354
21.038	0.67191	0.709358	0.667889	0.553246	0.583644	0.678218	0.621102	0.701591	0.605389	0.628565	0.612652	0.622722	0.673231	0.56423	0.62835	0.57212	0.556726	0.602797	0.518929	0.685895	0.550797	0.649599	0.539402	0.695385	0.258435	0.318889	0.327664	0.270255	0.265085	0.267537	0.227847	0.347027	0.319232	0.436524	0.451071	0.30585	0.362999	0.339443	0.34212	0.336433	0.362486	0.312441	0.313187	0.297118	0.386361	0.330558	0.287278	0.389964	0.316397
21.238	0.667217	0.705994	0.661512	0.559016	0.580584	0.681204	0.614476	0.698436	0.604018	0.623272	0.632863	0.635899	0.653493	0.571336	0.626851	0.563234	0.573151	0.582751	0.503373	0.682158	0.542222	0.657957	0.525176	0.701025	0.263072	0.341907	0.329642	0.273127	0.272847	0.261516	0.22958	0.351904	0.321027	0.44995	0.474086	0.317672	0.353677	0.333328	0.332945	0.340072	0.373064	0.317992	0.318058	0.29244	0.396918	0.327182	0.292964	0.403854	0.317281
21.439	0.678599	0.694345	0.647689	0.561552	0.58706	0.693547	0.620898	0.705984	0.616462	0.63702	0.643892	0.653714	0.662407	0.618877	0.6443	0.583149	0.571284	0.600837	0.50563	0.681802	0.541301	0.64598	0.525022	0.700584	0.272187	0.34271	0.329823	0.277427	0.286499	0.26179	0.236017	0.356993	0.321964	0.466934	0.458187	0.294036	0.338227	0.341335	0.326797	0.342066	0.370412	0.316858	0.318323	0.282422	0.382959	0.328286	0.294337	0.394947	0.311806
21.638	0.638335	0.696676	0.64609	0.562134	0.561816	0.694581	0.618124	0.696244	0.592836	0.623834	0.631059	0.636271	0.680075	0.586346	0.615645	0.60195	0.583563	0.614969	0.511273	0.696197	0.54365	0.67482	0.556673	0.689676	0.258725	0.317433	0.326437	0.270212	0.286593	0.281309	0.228448	0.355646	0.335826	0.449942	0.466269	0.305268	0.339476	0.312497	0.348679	0.340326	0.368374	0.329923	0.319904	0.300936	0.381647	0.344566	0.291361	0.407679	0.325397
21.838	0.701132	0.701189	0.656183	0.55985	0.574902	0.700489	0.619941	0.697406	0.583364	0.633625	0.614532	0.622328	0.681351	0.581273	0.626546	0.595634	0.58366	0.60552	0.502097	0.691812	0.54171	0.645106	0.548108	0.685328	0.268915	0.316075	0.334135	0.27113	0.265604	0.278187	0.237852	0.359618	0.336842	0.429836	0.449502	0.292504	0.321554	0.335455	0.340679	0.327329	0.365562	0.317971	0.321152	0.288098	0.378607	0.324055	0.294852	0.406795	0.311126
22.039	0.678691	0.690992	0.660808	0.571991	0.563991	0.679677	0.626077	0.682693	0.614426	0.667833	0.641797	0.644342	0.694563	0.579105	0.631329	0.592716	0.566457	0.600418	0.503337	0.674647	0.546593	0.647697	0.533908	0.695922	0.25908	0.341827	0.321947	0.268429	0.277549	0.279362	0.239647	0.335777	0.332186	0.471112	0.479309	0.320772	0.369032	0.340584	0.332631	0.336184	0.358562	0.314256	0.327949	0.282275	0.36406	0.3228	0.292838	0.399626	0.310176
22.238	0.689122	0.713272	0.66909	0.581414	0.580909	0.698095	0.61428	0.685565	0.608347	0.65244	0.629355	0.676881	0.683989	0.601926	0.634134	0.598732	0.558565	0.59536	0.499142	0.685137	0.528282	0.664497	0.537245	0.704849	0.263815	0.326041	0.344954	0.273836	0.288262	0.270942	0.238028	0.363213	0.32743	0.448716	0.466449	0.28071	0.324458	0.315706	0.30702	0.352727	0.358838	0.31936	0.3199	0.291988	0.368172	0.341205	0.288174	0.39943	0.308128
22.438	0.671299	0.703713	0.658337	0.570645	0.565291	0.684561	0.64792	0.693427	0.605284	0.645467	0.634373	0.640993	0.663591	0.596048	0.622393	0.612923	0.541009	0.576543	0.514953	0.683423	0.538747	0.663109	0.531993	0.710531	0.254593	0.310803	0.329313	0.274955	0.283749	0.275686	0.236906	0.346094	0.311579	0.441464	0.469585	0.275388	0.337238	0.328646	0.32912	0.383835	0.36789	0.321104	0.317618	0.290195	0.368214	0.334039	0.281623	0.383556	0.322413
22.639	0.689055	0.708195	0.657579	0.58342	0.564033	0.692498	0.618796	0.680414	0.603842	0.654673	0.61822	0.64045	0.683918	0.599923	0.631229	0.596723	0.558309	0.577228	0.51806	0.686128	0.53293	0.697307	0.54269	0.71587	0.267967	0.337483	0.330226	0.273945	0.278688	0.278832	0.235106	0.355459	0.33275	0.444755	0.444653	0.304839	0.331982	0.33238	0.330098	0.372503	0.371614	0.327137	0.329821	0.294749	0.381641	0.340793	0.298814	0.408375	0.318681
22.838	0.677851	0.718591	0.648545	0.574902	0.538179	0.709727	0.61788	0.693455	0.603022	0.661458	0.623534	0.64211	0.678928	0.589391	0.64317	0.60436	0.589648	0.576505	0.515244	0.68794	0.545924	0.680088	0.553076	0.698675	0.262898	0.333785	0.33273	0.274168	0.293172	0.276818	0.236881	0.36741	0.328797	0.464719	0.458043	0.308704	0.328358	0.339694	0.341553	0.348605	0.374523	0.324696	0.330008	0.288944	0.37714	0.333239	0.291396	0.397076	0.306847
23.038	0.700266	0.693486	0.670639	0.574332	0.593809	0.688909	0.619278	0.727992	0.615588	0.690784	0.638285	0.651932	0.688874	0.603221	0.651211	0.618157	0.590214	0.603671	0.525684	0.688811	0.548241	0.683051	0.542016	0.706516	0.263108	0.334803	0.330654	0.274706	0.27511	0.273415	0.226512	0.367501	0.332821	0.479955	0.470648	0.323968	0.335998	0.351862	0.330754	0.34031	0.373288	0.318634	0.32053	0.285794	0.386759	0.315746	0.300745	0.395587	0.307154
23.238	0.698407	0.712125	0.670104	0.551187	0.561219	0.710104	0.621399	0.717525	0.606634	0.644003	0.630323	0.628681	0.672928	0.58624	0.630891	0.592223	0.571274	0.598619	0.511185	0.703366	0.562094	0.677477	0.562396	0.695348	0.255819	0.325284	0.345238	0.26601	0.24253	0.258938	0.227951	0.344783	0.321846	0.43604	0.447776	0.309482	0.349837	0.332713	0.347447	0.350599	0.374496	0.320658	0.331699	0.292055	0.383187	0.33269	0.299284	0.398077	0.316075
23.438	0.679831	0.71547	0.651353	0.566355	0.571296	0.696963	0.615404	0.697968	0.60973	0.655103	0.624348	0.621991	0.658285	0.571977	0.619	0.596414	0.563678	0.625354	0.524483	0.711881	0.557222	0.685697	0.563074	0.717269	0.270695	0.335191	0.338329	0.274339	0.273901	0.283799	0.232363	0.362551	0.329166	0.45139	0.44037	0.268659	0.3297	0.34047	0.329004	0.337986	0.37004	0.32762	0.324876	0.284305	0.378737	0.327462	0.294651	0.404533	0.31354
23.638	0.68851	0.734672	0.665219	0.588409	0.584367	0.718668	0.625421	0.696775	0.609982	0.64949	0.627512	0.633941	0.679816	0.572019	0.625422	0.594934	0.57927	0.608618	0.522575	0.738702	0.547316	0.684265	0.552002	0.731879	0.266094	0.341272	0.347394	0.283029	0.308083	0.277431	0.240612	0.382952	0.333192	0.464927	0.465864	0.292741	0.346423	0.330383	0.32098	0.350606	0.371198	0.319624	0.332509	0.278998	0.365005	0.339161	0.295775	0.403109	0.320688
23.838	0.665003	0.707012	0.653688	0.574917	0.561224	0.687424	0.603697	0.691982	0.61707	0.646987	0.640403	0.650468	0.672942	0.582126	0.651579	0.598096	0.586777	0.610861	0.540496	0.701922	0.569804	0.691165	0.562332	0.758051	0.265994	0.322371	0.337756	0.284406	0.275357	0.277817	0.250188	0.379941	0.328349	0.457516	0.460257	0.280678	0.318006	0.349708	0.335637	0.323104	0.377673	0.318486	0.31811	0.289797	0.377629	0.330595	0.29709	0.397145	0.31275
24.038	0.707136	0.731442	0.646103	0.566818	0.57508	0.710521	0.62944	0.700308	0.620399	0.648871	0.622482	0.65536	0.664343	0.601543	0.634088	0.59566	0.575953	0.604698	0.535573	0.690931	0.570897	0.657263	0.549114	0.712892	0.276306	0.341541	0.340666	0.281308	0.315921	0.277183	0.257338	0.382075	0.328417	0.482273	0.470643	0.280249	0.340105	0.344724	0.331692	0.335692	0.367932	0.321609	0.325428	0.295967	0.3678	0.314129	0.298478	0.41134	0.311737
24.238	0.685864	0.698218	0.686975	0.586424	0.573569	0.694181	0.620569	0.693486	0.646463	0.677315	0.652063	0.705397	0.700832	0.622791	0.647948	0.619926	0.587533	0.608582	0.525653	0.708076	0.553247	0.673367	0.550323	0.73035	0.279419	0.332441	0.345057	0.27216	0.309417	0.281607	0.24547	0.365777	0.32155	0.446659	0.438093	0.27992	0.327263	0.333269	0.318065	0.343281	0.380185	0.339112	0.333946	0.285144	0.38975	0.342684	0.309076	0.415666	0.314725
24.438	0.680495	0.708385	0.654161	0.573673	0.588525	0.680065	0.61252	0.693804	0.645151	0.647682	0.643582	0.657749	0.695314	0.588579	0.645175	0.597947	0.588224	0.602231	0.532493	0.688168	0.560117	0.670383	0.563306	0.724551	0.273824	0.333303	0.343158	0.281987	0.258785	0.266343	0.242582	0.358209	0.334873	0.457694	0.436228	0.305387	0.376546	0.354382	0.341156	0.32677	0.388149	0.325926	0.325171	0.287466	0.375291	0.332405	0.28358	0.406219	0.319837
24.638	0.729504	0.710897	0.699111	0.566881	0.588403	0.703914	0.656097	0.704213	0.636278	0.642906	0.610454	0.650207	0.690369	0.59115	0.63841	0.608886	0.607552	0.586489	0.513931	0.692216	0.541148	0.673371	0.534976	0.703687	0.259525	0.33951	0.343971	0.278841	0.295397	0.26872	0.249063	0.364972	0.327224	0.460882	0.453808	0.310523	0.352015	0.348592	0.343324	0.362728	0.371964	0.321716	0.326718	0.288432	0.369263	0.33545	0.283744	0.4029	0.317622
24.838	0.690767	0.687543	0.658121	0.586617	0.583355	0.686818	0.626896	0.694179	0.620791	0.65847	0.611447	0.643171	0.671635	0.56119	0.614728	0.602717	0.587978	0.578265	0.532181	0.709415	0.559461	0.666427	0.536578	0.710321	0.267982	0.331704	0.343571	0.274296	0.307443	0.272563	0.24923	0.345625	0.33618	0.452836	0.458896	0.271898	0.365079	0.342804	0.320203	0.330995	0.366099	0.33009	0.325031	0.294296	0.382009	0.331775	0.308486	0.40483	0.311058
25.038	0.695183	0.710043	0.656503	0.568197	0.578495	0.692946	0.612244	0.693127	0.625657	0.664829	0.622031	0.640505	0.714021	0.581878	0.653191	0.633384	0.581443	0.604978	0.532609	0.704252	0.562503	0.681605	0.542144	0.72489	0.268544	0.339193	0.352404	0.280245	0.295283	0.280475	0.257887	0.389843	0.318099	0.43988	0.461972	0.293864	0.349326	0.309101	0.304293	0.346045	0.368077	0.31967	0.321266	0.293806	0.395847	0.349035	0.292998	0.407208	0.32342
25.238	0.702729	0.691024	0.663407	0.560956	0.589372	0.7123	0.63474	0.703251	0.631379	0.663399	0.607551	0.657	0.694627	0.564707	0.635496	0.615183	0.574938	0.593876	0.531435	0.692087	0.593082	0.664692	0.540233	0.737356	0.26739	0.352737	0.345695	0.273382	0.252726	0.270439	0.242048	0.360586	0.332024	0.469864	0.484416	0.29836	0.3783	0.352516	0.339745	0.355855	0.377223	0.338611	0.328367	0.300069	0.38389	0.343766	0.296805	0.394644	0.313562
25.438	0.701478	0.708001	0.658652	0.564408	0.585745	0.699177	0.606219	0.714887	0.624416	0.661779	0.601437	0.654258	0.671664	0.574737	0.632518	0.602206	0.562384	0.575013	0.517132	0.684882	0.550937	0.683409	0.53911	0.693289	0.265621	0.351659	0.339411	0.282938	0.307052	0.278296	0.246661	0.399952	0.337494	0.465125	0.473973	0.308227	0.359137	0.345213	0.355753	0.340787	0.379618	0.324999	0.331315	0.301312	0.384424	0.348124	0.301081	0.40211	0.306945
25.638	0.715483	0.719546	0.66365	0.591873	0.580005	0.702808	0.624713	0.703976	0.643702	0.659895	0.626484	0.666974	0.694768	0.580766	0.649995	0.611474	0.547141	0.588626	0.515628	0.67807	0.521607	0.664442	0.537789	0.717319	0.269093	0.353422	0.347668	0.276953	0.308866	0.277885	0.25714	0.38205	0.330794	0.464907	0.460529	0.289278	0.371692	0.352806	0.329798	0.34868	0.38572	0.328664	0.323281	0.289955	0.366909	0.3365	0.2919	0.400392	0.317206
25.839	0.702164	0.709333	0.663901	0.580111	0.582408	0.69134	0.63535	0.701791	0.620829	0.682403	0.629265	0.647855	0.690532	0.583988	0.638475	0.607521	0.560044	0.598985	0.527828	0.705659	0.541288	0.688774	0.52489	0.740849	0.26211	0.316463	0.352576	0.267736	0.269777	0.266755	0.244354	0.341553	0.322519	0.442952	0.483055	0.285508	0.364658	0.324914	0.327497	0.342027	0.376991	0.32163	0.326302	0.286004	0.374005	0.352051	0.302167	0.401281	0.317387
26.038	0.697127	0.731511	0.67587	0.571684	0.58204	0.687216	0.628931	0.707401	0.629851	0.631972	0.608866	0.637619	0.677992	0.577033	0.624425	0.589783	0.558852	0.609239	0.544235	0.699938	0.561643	0.710608	0.53903	0.725766	0.274778	0.341782	0.358148	0.274398	0.315554	0.273747	0.252123	0.35516	0.321658	0.446201	0.464324	0.286306	0.340117	0.317071	0.341102	0.32854	0.371336	0.324573	0.334579	0.289734	0.384021	0.346855	0.303737	0.396336	0.308305
26.238	0.701697	0.704058	0.675164	0.575417	0.597543	0.683429	0.627708	0.717668	0.61499	0.655597	0.628254	0.662588	0.681118	0.581554	0.634492	0.613195	0.549294	0.584978	0.528212	0.688236	0.560679	0.678696	0.54745	0.723879	0.263501	0.33443	0.347079	0.274165	0.273182	0.266674	0.242535	0.329808	0.325956	0.460717	0.479126	0.284686	0.349482	0.343721	0.345452	0.353742	0.366363	0.327495	0.322878	0.294768	0.377704	0.343807	0.296627	0.394556	0.314584
26.439	0.679571	0.709284	0.670045	0.564478	0.571811	0.676803	0.618558	0.671477	0.65277	0.684287	0.634248	0.672914	0.716053	0.613072	0.657276	0.628259	0.57462	0.598998	0.51612	0.711433	0.553244	0.64951	0.536015	0.699867	0.267933	0.346761	0.350155	0.272901	0.306774	0.267715	0.245481	0.372051	0.335979	0.457246	0.467535	0.280901	0.368272	0.344148	0.354308	0.347553	0.381917	0.316545	0.318508	0.290571	0.373787	0.344878	0.315371	0.406116	0.31081
26.638	0.687193	0.720125	0.667921	0.574367	0.597528	0.697132	0.626284	0.714181	0.632242	0.661906	0.627549	0.649572	0.695694	0.608235	0.638613	0.602506	0.586784	0.618758	0.531244	0.716291	0.56209	0.684451	0.550762	0.717217	0.267991	0.341966	0.349935	0.27477	0.307832	0.28237	0.24321	0.390484	0.331222	0.473621	0.469414	0.282431	0.345997	0.346171	0.342988	0.330067	0.373725	0.324523	0.320616	0.277407	0.363597	0.339236	0.290674	0.392713	0.320386
26.838	0.687877	0.700932	0.655941	0.55814	0.588671	0.681089	0.613246	0.701437	0.634837	0.651066	0.602347	0.635697	0.683599	0.576667	0.642806	0.593377	0.562775	0.625844	0.525691	0.724918	0.561136	0.696202	0.545162	0.729152	0.271648	0.332237	0.354654	0.279078	0.312749	0.273218	0.243566	0.35901	0.338577	0.457647	0.475999	0.269074	0.359971	0.352454	0.337564	0.342471	0.376625	0.337422	0.329887	0.297272	0.382085	0.349756	0.30178	0.401279	0.30949
27.039	0.68696	0.701081	0.670351	0.592666	0.584836	0.683709	0.615677	0.709443	0.63178	0.6559	0.635037	0.675045	0.746383	0.597255	0.641755	0.605342	0.545153	0.606	0.534629	0.717043	0.562472	0.704629	0.560099	0.739083	0.267423	0.344823	0.356471	0.277951	0.293825	0.273939	0.246145	0.344804	0.35447	0.452566	0.471806	0.319605	0.375558	0.351395	0.379253	0.341301	0.375406	0.333698	0.329322	0.302226	0.373177	0.351732	0.304391	0.406533	0.313271
27.238	0.705474	0.72186	0.675704	0.581999	0.587496	0.691008	0.629226	0.718437	0.624761	0.637272	0.619607	0.629816	0.661482	0.585432	0.629476	0.609266	0.572205	0.605454	0.528233	0.706941	0.576369	0.675295	0.549028	0.708887	0.267649	0.341024	0.346828	0.277104	0.306613	0.278803	0.249756	0.356976	0.324043	0.45429	0.461229	0.295874	0.34492	0.336615	0.35844	0.329717	0.357634	0.329169	0.329575	0.296401	0.381403	0.340745	0.312503	0.404791	0.314946
27.438	0.693825	0.721823	0.666566	0.571948	0.582739	0.692216	0.644738	0.693148	0.6296	0.663076	0.622271	0.662446	0.699376	0.592677	0.650962	0.599333	0.57318	0.606774	0.525548	0.699818	0.57166	0.677517	0.544772	0.7097	0.269494	0.349347	0.358209	0.282374	0.281781	0.273481	0.249408	0.380478	0.349128	0.477465	0.471138	0.317248	0.358667	0.37397	0.352745	0.330399	0.385239	0.339588	0.330009	0.296467	0.395783	0.363442	0.313487	0.404341	0.318202
27.639	0.713281	0.705472	0.656228	0.595924	0.600244	0.726755	0.630172	0.7358	0.618381	0.673147	0.632279	0.64173	0.708338	0.594742	0.654257	0.613109	0.579785	0.600897	0.52971	0.702834	0.548496	0.654263	0.537147	0.746416	0.26077	0.333387	0.359701	0.275201	0.272186	0.274511	0.243584	0.365005	0.328974	0.447636	0.466018	0.268808	0.365648	0.335786	0.338221	0.346834	0.388594	0.325172	0.332917	0.275266	0.380399	0.341236	0.308413	0.402629	0.320248
27.838	0.683015	0.700588	0.658033	0.584961	0.596249	0.680896	0.631539	0.724725	0.632093	0.679974	0.635521	0.679501	0.703927	0.630761	0.65134	0.610019	0.577525	0.59164	0.529822	0.699927	0.537817	0.67615	0.534397	0.719268	0.278173	0.351528	0.362354	0.272792	0.265002	0.266246	0.242204	0.35859	0.341311	0.450345	0.476023	0.302161	0.368679	0.335605	0.317449	0.341297	0.37479	0.320568	0.323483	0.288793	0.374148	0.334159	0.304626	0.396925	0.3147
28.038	0.70032	0.711119	0.67699	0.575419	0.585203	0.695419	0.629518	0.722086	0.614571	0.689365	0.627985	0.662891	0.680647	0.602462	0.638919	0.607589	0.596064	0.591634	0.53793	0.715656	0.560526	0.681184	0.53951	0.713329	0.267894	0.355774	0.354688	0.27347	0.272077	0.289601	0.244393	0.343362	0.325222	0.444532	0.46277	0.27964	0.344807	0.339074	0.309805	0.334994	0.37354	0.332614	0.331434	0.301912	0.385712	0.342394	0.311083	0.402136	0.302656
28.239	0.667183	0.71205	0.645986	0.566308	0.57076	0.712393	0.62548	0.702651	0.604481	0.670443	0.59806	0.635488	0.657092	0.5912	0.639398	0.593322	0.572755	0.588392	0.526539	0.7131	0.537039	0.661902	0.553424	0.723238	0.280128	0.350898	0.366893	0.283886	0.290988	0.273976	0.238566	0.367662	0.332044	0.454736	0.467	0.277022	0.360704	0.3386	0.346931	0.371034	0.368253	0.336996	0.324066	0.283228	0.389585	0.345906	0.296835	0.401831	0.309372
28.438	0.698556	0.690799	0.658563	0.553575	0.573563	0.702427	0.654273	0.704894	0.631808	0.723118	0.645139	0.660979	0.679462	0.6125	0.653004	0.615083	0.576714	0.60085	0.537581	0.711476	0.563085	0.675399	0.544389	0.722031	0.272617	0.363335	0.368297	0.278986	0.313611	0.28314	0.252387	0.367893	0.335903	0.464603	0.450918	0.303702	0.371985	0.354774	0.345935	0.348935	0.375394	0.323176	0.317367	0.290418	0.379759	0.341701	0.312186	0.396113	0.319875
28.638	0.698922	0.696934	0.653098	0.580375	0.589034	0.699036	0.645241	0.71566	0.646895	0.667057	0.639534	0.651956	0.693334	0.594793	0.649458	0.627015	0.602189	0.603933	0.544019	0.711016	0.560778	0.687347	0.562156	0.74337	0.278006	0.355138	0.369701	0.282318	0.302386	0.290515	0.25139	0.375818	0.330734	0.463873	0.477933	0.308735	0.368673	0.361157	0.311722	0.362096	0.381048	0.326112	0.333143	0.294233	0.385829	0.357961	0.327508	0.394767	0.319047
28.839	0.695277	0.702003	0.677828	0.57754	0.59589	0.683774	0.64684	0.713664	0.634199	0.6777	0.608422	0.6384	0.712068	0.595862	0.634667	0.627889	0.593855	0.601377	0.548071	0.71303	0.572283	0.701858	0.567015	0.73808	0.272434	0.341163	0.36207	0.277489	0.276595	0.285047	0.257227	0.362034	0.334379	0.486546	0.486414	0.299375	0.346683	0.361351	0.371041	0.358506	0.373737	0.330504	0.327385	0.296627	0.380174	0.354044	0.308347	0.404439	0.313599
29.038	0.714258	0.705774	0.659993	0.602334	0.575807	0.727699	0.665503	0.722796	0.63954	0.696219	0.63482	0.653625	0.700089	0.617807	0.647033	0.607112	0.565245	0.607242	0.543516	0.70923	0.555462	0.687981	0.542218	0.731152	0.251393	0.342202	0.364183	0.273858	0.264018	0.283501	0.239065	0.358664	0.332113	0.471706	0.491464	0.265103	0.359776	0.340705	0.353534	0.352652	0.369159	0.326935	0.32955	0.274787	0.378523	0.336813	0.307346	0.39458	0.31934
29.238	0.700915	0.717843	0.661929	0.601774	0.584045	0.69895	0.644446	0.713519	0.63834	0.691221	0.631865	0.648885	0.703773	0.607542	0.646158	0.616239	0.584958	0.603042	0.542764	0.6886	0.586406	0.705331	0.560078	0.749823	0.267435	0.353325	0.36863	0.272639	0.292604	0.26516	0.248439	0.353499	0.350173	0.487907	0.481751	0.322055	0.356896	0.349174	0.335003	0.354745	0.368153	0.334998	0.338349	0.283328	0.376854	0.355385	0.321339	0.398776	0.331721
29.438	0.718032	0.710776	0.686489	0.59964	0.589528	0.720997	0.641808	0.72951	0.649454	0.713066	0.687163	0.68169	0.711258	0.617402	0.650316	0.634675	0.560296	0.610289	0.551469	0.715148	0.586337	0.693683	0.564146	0.742572	0.270934	0.352477	0.360903	0.278402	0.275149	0.275769	0.239831	0.364876	0.341118	0.451299	0.468282	0.319854	0.358079	0.324819	0.343313	0.357281	0.367877	0.327074	0.329341	0.290161	0.37288	0.346998	0.298737	0.404756	0.324437
29.638	0.696101	0.732768	0.668217	0.582032	0.570742	0.682144	0.644226	0.732779	0.639851	0.69384	0.617859	0.654137	0.714956	0.607339	0.644817	0.626687	0.590702	0.60679	0.547324	0.721014	0.57201	0.704104	0.55601	0.735433	0.261209	0.342962	0.366821	0.279629	0.262544	0.276484	0.239789	0.356993	0.343573	0.465996	0.475461	0.286566	0.352502	0.353411	0.334705	0.3479	0.379639	0.324556	0.326226	0.291937	0.37964	0.341305	0.310268	0.394795	0.316073
29.838	0.689425	0.698448	0.656081	0.554408	0.569407	0.696072	0.643345	0.719612	0.663073	0.722053	0.65282	0.673516	0.712217	0.637815	0.678333	0.628231	0.602327	0.614986	0.551817	0.728908	0.599425	0.71298	0.575062	0.762257	0.27059	0.341991	0.374521	0.271835	0.277564	0.272303	0.249265	0.358186	0.334612	0.481891	0.508801	0.317338	0.389316	0.346593	0.342796	0.356149	0.349988	0.33174	0.314742	0.276552	0.369087	0.344195	0.306801	0.394422	0.319554
30.038	0.718802	0.717481	0.663463	0.569637	0.556754	0.700404	0.649833	0.708319	0.641335	0.692993	0.629276	0.653861	0.710219	0.622389	0.660875	0.628553	0.601653	0.613362	0.554337	0.71718	0.576934	0.702289	0.568923	0.751553	0.270649	0.342217	0.36187	0.274249	0.277753	0.284195	0.24269	0.342233	0.334527	0.441754	0.475957	0.29586	0.370386	0.34501	0.316413	0.350425	0.373063	0.333563	0.323494	0.281586	0.371465	0.334693	0.301579	0.39954	0.311627
30.239	0.729742	0.702818	0.65681	0.568354	0.580586	0.697294	0.663491	0.719524	0.638692	0.687119	0.619596	0.646599	0.673019	0.589918	0.652434	0.609731	0.578498	0.611298	0.538507	0.710347	0.584738	0.696382	0.558568	0.761824	0.270385	0.33691	0.359541	0.277993	0.265917	0.284945	0.256	0.350278	0.326271	0.44507	0.480408	0.301151	0.349388	0.345684	0.325319	0.357245	0.356852	0.340663	0.327135	0.281272	0.3787	0.353697	0.309307	0.408089	0.32858
30.438	0.712888	0.727435	0.660282	0.561309	0.575573	0.697971	0.652931	0.714713	0.632248	0.687155	0.614807	0.651913	0.686133	0.606423	0.642676	0.616029	0.58303	0.631027	0.544831	0.710959	0.562806	0.695449	0.570727	0.742351	0.268911	0.345517	0.377714	0.279217	0.274882	0.288347	0.24015	0.371596	0.33696	0.446561	0.478012	0.270216	0.347664	0.331417	0.329319	0.327239	0.374765	0.342967	0.324412	0.302292	0.384127	0.349403	0.313859	0.396904	0.311795
30.638	0.731705	0.688754	0.661676	0.582071	0.581902	0.692223	0.654594	0.711726	0.630393	0.684869	0.637146	0.653931	0.679824	0.603062	0.652489	0.624839	0.612039	0.606822	0.562582	0.714155	0.601901	0.697838	0.568072	0.781096	0.260699	0.346455	0.373294	0.283439	0.280878	0.276496	0.253961	0.356598	0.347594	0.467842	0.486459	0.321116	0.362744	0.347703	0.337014	0.360599	0.368775	0.33361	0.320642	0.288885	0.385591	0.345734	0.301151	0.392157	0.323049
30.839	0.712378	0.712579	0.678884	0.577011	0.600954	0.706247	0.648231	0.709958	0.647455	0.682414	0.647266	0.656951	0.70395	0.593066	0.656372	0.648918	0.579687	0.604186	0.557863	0.714142	0.589582	0.695331	0.554767	0.749051	0.270699	0.362093	0.366149	0.286508	0.271569	0.278023	0.254345	0.347878	0.334162	0.465591	0.462452	0.307618	0.331977	0.336609	0.337768	0.325889	0.370746	0.329274	0.327134	0.290238	0.383104	0.335869	0.309596	0.398108	0.320877
31.038	0.705154	0.73482	0.67161	0.571132	0.592263	0.708141	0.667045	0.707991	0.658886	0.680916	0.644447	0.697634	0.673012	0.600737	0.669516	0.619268	0.584303	0.613969	0.560705	0.70677	0.598574	0.696183	0.566809	0.759227	0.270848	0.366407	0.359951	0.27857	0.311825	0.268307	0.250011	0.354907	0.346058	0.443985	0.472635	0.325756	0.364429	0.343474	0.32946	0.345161	0.381552	0.331168	0.322185	0.293288	0.376507	0.33129	0.299042	0.406238	0.325838
31.238	0.698717	0.737921	0.691649	0.586499	0.599747	0.72369	0.652873	0.72057	0.634	0.676908	0.610321	0.699006	0.675123	0.600399	0.661099	0.633752	0.589549	0.618282	0.548387	0.71403	0.573803	0.703572	0.566518	0.765843	0.278287	0.348138	0.366284	0.282778	0.303879	0.282127	0.250144	0.359788	0.342852	0.445938	0.471767	0.285552	0.360306	0.333844	0.352925	0.34369	0.383223	0.337751	0.32389	0.300846	0.382117	0.354138	0.325017	0.407566	0.328653
31.439	0.700524	0.733147	0.662154	0.579409	0.57701	0.690401	0.648698	0.724074	0.646279	0.682632	0.640637	0.699579	0.674475	0.629492	0.658776	0.624038	0.591764	0.620198	0.546167	0.711611	0.572136	0.666771	0.546659	0.766586	0.275348	0.348778	0.370725	0.272939	0.303895	0.276584	0.252973	0.394395	0.344966	0.454717	0.470165	0.304068	0.375468	0.341915	0.337607	0.342534	0.374388	0.335108	0.334192	0.299974	0.378961	0.360175	0.314947	0.411604	0.322834
31.638	0.708016	0.746214	0.672323	0.574946	0.596168	0.699499	0.644761	0.706064	0.648463	0.686643	0.639	0.714729	0.657753	0.611208	0.659531	0.623525	0.585348	0.613745	0.550776	0.708196	0.580156	0.674475	0.554978	0.748495	0.261543	0.364613	0.369391	0.275804	0.2949	0.288836	0.258254	0.370743	0.330808	0.467676	0.467878	0.295842	0.371454	0.342338	0.342706	0.350089	0.389337	0.330039	0.323383	0.288394	0.383889	0.34572	0.317524	0.401622	0.31354
31.838	0.728513	0.719911	0.666351	0.578139	0.586403	0.717818	0.639341	0.704162	0.618724	0.673518	0.642379	0.68853	0.705596	0.619682	0.654015	0.61772	0.571472	0.608964	0.553627	0.716534	0.574447	0.674061	0.573686	0.753893	0.279677	0.355275	0.370102	0.276982	0.297501	0.286438	0.243656	0.391191	0.326867	0.450893	0.454143	0.292361	0.369295	0.331259	0.344159	0.367515	0.393584	0.334834	0.330038	0.295157	0.384714	0.358445	0.306315	0.412467	0.315389
32.039	0.69356	0.731331	0.678381	0.598871	0.59804	0.739945	0.651055	0.708474	0.639177	0.672374	0.649619	0.687081	0.70055	0.628081	0.655128	0.628855	0.578056	0.611962	0.536355	0.701614	0.587512	0.663316	0.560854	0.737495	0.257707	0.341088	0.364005	0.282325	0.278979	0.264338	0.235612	0.346017	0.332044	0.460599	0.46271	0.287902	0.355288	0.338921	0.355002	0.356624	0.395117	0.327873	0.322208	0.294922	0.385077	0.347383	0.322385	0.397093	0.319842
32.238	0.702766	0.732946	0.667778	0.597492	0.601047	0.710704	0.632651	0.697438	0.651866	0.677722	0.627308	0.680153	0.722844	0.623445	0.672792	0.635516	0.608695	0.629053	0.561942	0.741628	0.61571	0.698806	0.559075	0.751447	0.261028	0.347082	0.367828	0.277092	0.278949	0.269282	0.247834	0.360316	0.331115	0.451185	0.455844	0.307491	0.379888	0.345388	0.357263	0.348351	0.385584	0.342307	0.324877	0.294706	0.384344	0.347128	0.308783	0.402038	0.316313
32.438	0.690877	0.720762	0.686233	0.577042	0.588007	0.706059	0.67009	0.698529	0.637212	0.673067	0.640027	0.690325	0.703538	0.590284	0.671683	0.611308	0.59048	0.629518	0.549612	0.720436	0.580226	0.676904	0.564354	0.73651	0.267004	0.365991	0.377866	0.280186	0.297227	0.26664	0.250267	0.36579	0.338529	0.453686	0.490236	0.303105	0.356211	0.348504	0.348074	0.3509	0.383694	0.321917	0.320349	0.294744	0.389702	0.352355	0.320595	0.398152	0.323127
32.639	0.704146	0.735707	0.687195	0.591509	0.612838	0.694259	0.668235	0.719913	0.669113	0.707111	0.655074	0.696	0.737576	0.629726	0.682452	0.643289	0.614246	0.628821	0.558603	0.732923	0.598104	0.708049	0.57866	0.768812	0.267251	0.347131	0.366351	0.282397	0.304287	0.277317	0.248367	0.374044	0.323329	0.452927	0.486057	0.280602	0.37156	0.36013	0.364159	0.344462	0.395216	0.337175	0.332035	0.300116	0.377526	0.352414	0.331827	0.408135	0.329493
32.838	0.69364	0.725246	0.661881	0.572365	0.590594	0.696672	0.665374	0.720618	0.639091	0.665531	0.660172	0.674521	0.697908	0.608312	0.657882	0.627852	0.543527	0.615138	0.542985	0.679302	0.563224	0.662042	0.547735	0.728896	0.273947	0.356466	0.36882	0.277555	0.290099	0.267462	0.238583	0.350919	0.334469	0.439519	0.465444	0.301569	0.367704	0.35082	0.361716	0.359418	0.385662	0.344555	0.330775	0.310294	0.381162	0.358725	0.333314	0.398082	0.326243
33.038	0.691315	0.726094	0.668025	0.558648	0.592226	0.695393	0.669864	0.707165	0.635665	0.695713	0.657088	0.68319	0.719855	0.611848	0.669051	0.641789	0.56166	0.619707	0.54028	0.695635	0.575881	0.68105	0.549073	0.721065	0.269189	0.347377	0.36891	0.275031	0.289235	0.275389	0.240917	0.366249	0.327293	0.474406	0.495114	0.287334	0.373708	0.34019	0.363368	0.348515	0.381853	0.330744	0.33566	0.302225	0.391634	0.354253	0.320889	0.403013	0.323315
33.239	0.702443	0.729051	0.669246	0.565684	0.609382	0.704031	0.672307	0.730767	0.625831	0.665373	0.633063	0.669604	0.697656	0.61834	0.663709	0.628307	0.570215	0.587189	0.538958	0.684158	0.583932	0.664366	0.559163	0.716166	0.271408	0.377923	0.386323	0.28133	0.308938	0.271474	0.255179	0.394133	0.32185	0.450565	0.470083	0.302861	0.37403	0.33992	0.34745	0.347605	0.388361	0.342888	0.331007	0.301429	0.395207	0.351342	0.324185	0.407925	0.315204
33.438	0.674281	0.722287	0.645473	0.550272	0.60771	0.701057	0.653592	0.713099	0.6227	0.660316	0.64526	0.667321	0.702718	0.5894	0.636694	0.614363	0.572638	0.60125	0.544667	0.699604	0.595684	0.686781	0.551269	0.743928	0.266493	0.349857	0.37813	0.278456	0.295288	0.271247	0.245547	0.384052	0.329779	0.46631	0.468274	0.301272	0.386853	0.359213	0.35251	0.365754	0.387252	0.332897	0.330567	0.291369	0.408902	0.349284	0.31125	0.392153	0.322622
33.638	0.713583	0.741477	0.691514	0.613312	0.61505	0.72985	0.659531	0.710545	0.632829	0.665079	0.636491	0.67458	0.700922	0.605647	0.649669	0.603422	0.589646	0.588787	0.533264	0.683431	0.598744	0.659065	0.54642	0.721804	0.27197	0.35717	0.365212	0.288975	0.320714	0.285027	0.238234	0.383153	0.329441	0.472256	0.464549	0.303056	0.373682	0.356163	0.344181	0.341712	0.389902	0.331834	0.331485	0.29626	0.392039	0.366247	0.302337	0.398967	0.321877
33.839	0.709959	0.7324	0.68712	0.564792	0.60264	0.714099	0.6604	0.717554	0.646887	0.697301	0.630367	0.678008	0.700906	0.604481	0.673378	0.641293	0.581059	0.591467	0.545342	0.7031	0.580886	0.683323	0.572049	0.744768	0.272349	0.356613	0.3812	0.283672	0.305748	0.276796	0.249526	0.37904	0.315742	0.431882	0.456714	0.251196	0.363156	0.32635	0.334125	0.344624	0.381942	0.339109	0.323514	0.290311	0.394614	0.357375	0.325855	0.393233	0.31827
34.038	0.651408	0.726787	0.695627	0.580286	0.5857	0.682067	0.672886	0.724954	0.648702	0.713316	0.643446	0.679644	0.724347	0.643997	0.664487	0.654197	0.614444	0.619596	0.558863	0.702303	0.575069	0.669178	0.576894	0.750783	0.266043	0.363443	0.385654	0.276554	0.314118	0.275784	0.251857	0.363804	0.320822	0.464918	0.442332	0.296502	0.360976	0.332178	0.352726	0.339524	0.388112	0.330581	0.329808	0.307318	0.396842	0.359117	0.317173	0.403099	0.32258
34.238	0.714363	0.722802	0.687003	0.561174	0.603878	0.711345	0.683206	0.717429	0.639578	0.701451	0.630863	0.703446	0.696733	0.617623	0.673212	0.63745	0.590133	0.607839	0.547476	0.694452	0.590789	0.686274	0.577932	0.738955	0.269019	0.339222	0.376897	0.281247	0.297227	0.281478	0.245834	0.369023	0.343178	0.448691	0.447812	0.305924	0.354234	0.334519	0.342462	0.329524	0.388186	0.323321	0.316364	0.29074	0.378872	0.333817	0.299498	0.388823	0.31239
34.439	0.714199	0.720716	0.668277	0.588094	0.590648	0.696864	0.660153	0.734645	0.651449	0.711993	0.646359	0.684075	0.707439	0.609765	0.664873	0.649758	0.593207	0.602212	0.559973	0.744524	0.581184	0.686067	0.571884	0.754413	0.273999	0.339462	0.381018	0.283796	0.300219	0.283028	0.24354	0.36571	0.32867	0.479937	0.477458	0.302153	0.378931	0.368398	0.355074	0.346634	0.395665	0.332346	0.330766	0.297168	0.387752	0.37072	0.312964	0.401394	0.323661
34.638	0.690068	0.73377	0.657715	0.570207	0.597919	0.70104	0.648695	0.730035	0.650199	0.696927	0.645379	0.679867	0.69385	0.632691	0.66565	0.628633	0.602506	0.626919	0.554096	0.728311	0.621126	0.705937	0.574368	0.758535	0.275687	0.359647	0.386351	0.288132	0.311416	0.286529	0.248606	0.398788	0.33952	0.453458	0.484504	0.337827	0.375061	0.365248	0.374819	0.351761	0.394311	0.33216	0.331285	0.30006	0.38585	0.354775	0.297216	0.39769	0.324921
34.838	0.674242	0.723025	0.666169	0.598439	0.595291	0.710339	0.652907	0.743339	0.656895	0.700519	0.661221	0.68735	0.708428	0.62732	0.670853	0.653774	0.583965	0.636628	0.556788	0.736473	0.586288	0.70359	0.559903	0.74757	0.270593	0.339587	0.381345	0.290771	0.30844	0.292907	0.241909	0.398341	0.326712	0.464813	0.483696	0.298445	0.35286	0.326653	0.352576	0.353934	0.390017	0.340985	0.333843	0.299357	0.40499	0.353676	0.306704	0.412579	0.322332
35.039	0.683623	0.703873	0.649381	0.588689	0.585255	0.673063	0.639304	0.678071	0.654562	0.681508	0.62538	0.697846	0.677418	0.605465	0.670316	0.63603	0.576389	0.614955	0.568616	0.69741	0.577185	0.691029	0.583194	0.76138	0.270336	0.329791	0.376395	0.274875	0.282837	0.271818	0.239445	0.375506	0.341117	0.46607	0.49888	0.309446	0.351155	0.352867	0.363829	0.343782	0.38247	0.333777	0.328484	0.297178	0.393025	0.353802	0.319544	0.398106	0.323601
35.238	0.6897	0.727486	0.659611	0.601159	0.594497	0.715956	0.657617	0.703071	0.66786	0.700386	0.669615	0.69444	0.705549	0.623017	0.671768	0.653466	0.592486	0.628688	0.570121	0.736028	0.578958	0.692964	0.584442	0.761414	0.259995	0.333815	0.378783	0.2851	0.308009	0.288287	0.24574	0.386095	0.338376	0.458042	0.484201	0.272635	0.366222	0.32095	0.354279	0.330567	0.376648	0.333178	0.321937	0.301051	0.38519	0.33796	0.304528	0.38858	0.322402
35.438	0.694508	0.71299	0.676943	0.597052	0.582897	0.690259	0.651504	0.703458	0.652851	0.676413	0.646985	0.684921	0.706595	0.605797	0.653743	0.646038	0.605767	0.632445	0.576796	0.717582	0.597519	0.697726	0.571007	0.760449	0.264565	0.342447	0.378983	0.280477	0.29468	0.278645	0.247597	0.373421	0.341546	0.472593	0.473928	0.322793	0.34548	0.342982	0.371871	0.354987	0.390972	0.341653	0.336733	0.294585	0.391131	0.357412	0.318397	0.402842	0.319019
35.638	0.68641	0.698373	0.641764	0.593736	0.60393	0.707392	0.649677	0.714125	0.65698	0.709786	0.653173	0.707078	0.710482	0.638435	0.663981	0.625517	0.578498	0.631767	0.57916	0.709066	0.594105	0.683753	0.584401	0.771526	0.272582	0.348589	0.379385	0.27668	0.290065	0.275192	0.24623	0.37278	0.331246	0.45407	0.498829	0.265842	0.355889	0.366345	0.358419	0.35685	0.392932	0.350824	0.338204	0.312797	0.401928	0.358296	0.311521	0.395029	0.323357
35.839	0.68637	0.682181	0.661691	0.576584	0.584878	0.708297	0.637978	0.696255	0.684049	0.690429	0.659352	0.698795	0.723976	0.639694	0.672734	0.641359	0.599235	0.616742	0.573409	0.73022	0.584329	0.712344	0.578256	0.768289	0.274249	0.347035	0.396922	0.290086	0.28998	0.287171	0.244137	0.38712	0.344867	0.479347	0.485335	0.320261	0.37478	0.351722	0.361683	0.357463	0.39663	0.343474	0.330831	0.306079	0.388885	0.365548	0.325882	0.397476	0.322023
36.038	0.714759	0.711392	0.661202	0.590173	0.596998	0.717164	0.658337	0.708831	0.677825	0.715275	0.65031	0.713788	0.765256	0.612214	0.693634	0.667722	0.613242	0.63607	0.580977	0.738958	0.57626	0.715605	0.589534	0.784647	0.266994	0.354331	0.389554	0.283522	0.271782	0.262943	0.249477	0.388122	0.325167	0.460343	0.476797	0.266223	0.351965	0.320718	0.343942	0.365226	0.403549	0.342609	0.336907	0.29571	0.396413	0.351256	0.301842	0.401866	0.318659
36.238	0.694861	0.724044	0.663046	0.597329	0.614678	0.704225	0.636921	0.706029	0.666777	0.6993	0.643844	0.689368	0.720789	0.638019	0.6683	0.634404	0.603863	0.619075	0.578961	0.725956	0.577176	0.72982	0.582523	0.780034	0.265268	0.357745	0.383186	0.285694	0.273609	0.276429	0.23869	0.352493	0.351909	0.470291	0.469581	0.324738	0.364826	0.357219	0.347336	0.358713	0.396797	0.340135	0.328863	0.307786	0.380513	0.340217	0.310544	0.393062	0.319184
36.439	0.698105	0.706187	0.664207	0.581784	0.593975	0.719515	0.673656	0.702893	0.656522	0.684814	0.666997	0.706187	0.709529	0.639405	0.659612	0.639007	0.588448	0.638282	0.578847	0.725861	0.603838	0.729093	0.586116	0.779885	0.277128	0.361823	0.394134	0.285258	0.284941	0.278537	0.252601	0.367863	0.345845	0.467097	0.493631	0.304994	0.35284	0.346313	0.353772	0.364103	0.402232	0.347965	0.343008	0.309324	0.399533	0.354378	0.327367	0.403617	0.317264
36.638	0.707914	0.725091	0.676456	0.587837	0.599982	0.703992	0.623475	0.714264	0.647941	0.707266	0.651161	0.679218	0.718353	0.624865	0.671464	0.641083	0.595141	0.624974	0.583335	0.726857	0.573091	0.703527	0.587113	0.793151	0.275341	0.362817	0.390245	0.285042	0.331743	0.284388	0.255299	0.411425	0.333781	0.450382	0.453102	0.266827	0.347684	0.337764	0.323994	0.35895	0.398757	0.341905	0.340113	0.297329	0.376815	0.347498	0.323246	0.399631	0.317901
36.838	0.689016	0.723567	0.661266	0.577804	0.579087	0.687974	0.632693	0.701931	0.669041	0.711826	0.659675	0.681384	0.718789	0.624307	0.673208	0.637223	0.593048	0.618395	0.576715	0.734715	0.579807	0.684186	0.58485	0.759587	0.264519	0.343141	0.389768	0.28422	0.285977	0.271547	0.2595	0.370536	0.337286	0.456435	0.457549	0.294741	0.360173	0.338655	0.37048	0.383497	0.401442	0.334692	0.337675	0.305443	0.384588	0.362509	0.323047	0.388249	0.311559
37.039	0.704243	0.716921	0.684501	0.585405	0.597476	0.699504	0.667084	0.712861	0.671255	0.719873	0.655463	0.675137	0.714211	0.620677	0.679294	0.645503	0.569908	0.627189	0.571888	0.705013	0.57781	0.692907	0.596963	0.752311	0.269163	0.362567	0.385423	0.278276	0.299848	0.287856	0.244582	0.366204	0.348105	0.463911	0.475495	0.283345	0.369874	0.351662	0.333127	0.365962	0.405241	0.342637	0.344991	0.307004	0.391734	0.356835	0.318421	0.39881	0.315256
37.238	0.712797	0.71411	0.679808	0.585076	0.60126	0.725333	0.647949	0.713392	0.659867	0.706151	0.615834	0.68332	0.704604	0.624693	0.659378	0.648137	0.591462	0.636593	0.58647	0.731569	0.58371	0.693346	0.597141	0.783043	0.279052	0.362724	0.396728	0.273967	0.298444	0.275489	0.244659	0.39713	0.344499	0.470527	0.494682	0.289974	0.356211	0.332853	0.359931	0.357538	0.40191	0.34094	0.340075	0.297526	0.382254	0.342621	0.316219	0.391806	0.308105
37.438	0.71378	0.724667	0.685227	0.608556	0.596489	0.707226	0.649265	0.709258	0.660832	0.721464	0.648807	0.677715	0.727909	0.605918	0.664381	0.646324	0.602339	0.625924	0.585492	0.711731	0.569827	0.708658	0.602197	0.771394	0.274908	0.363564	0.394096	0.287818	0.296462	0.282668	0.251096	0.384201	0.343495	0.45912	0.478558	0.279933	0.35455	0.325996	0.343352	0.328666	0.407452	0.347973	0.34434	0.307609	0.408402	0.368898	0.318671	0.402562	0.311431
37.639	0.709444	0.717156	0.667863	0.567123	0.591112	0.704468	0.65486	0.704005	0.654969	0.684245	0.652633	0.699351	0.74051	0.62518	0.673215	0.62722	0.583503	0.604045	0.577955	0.722131	0.566144	0.712478	0.600749	0.741553	0.267356	0.353167	0.393511	0.283392	0.279463	0.281377	0.245962	0.373394	0.336592	0.461498	0.487049	0.298421	0.375308	0.351447	0.351727	0.36793	0.412798	0.348441	0.33885	0.310542	0.389657	0.352795	0.340813	0.395233	0.315398
37.838	0.693029	0.711504	0.660825	0.576085	0.591651	0.697741	0.660665	0.712906	0.656705	0.691046	0.648336	0.698319	0.733787	0.629874	0.673224	0.641373	0.588216	0.626432	0.576266	0.712113	0.566329	0.704179	0.578669	0.755612	0.259019	0.353562	0.394277	0.288922	0.29286	0.276241	0.248719	0.396526	0.325504	0.454174	0.455056	0.27561	0.354744	0.359082	0.329955	0.349321	0.404836	0.349646	0.343677	0.305555	0.380911	0.358571	0.31837	0.396203	0.319982
38.038	0.694177	0.70257	0.661457	0.570522	0.574199	0.723368	0.646572	0.720616	0.670931	0.699441	0.667679	0.712454	0.737955	0.614121	0.690757	0.636843	0.591692	0.615511	0.568199	0.727703	0.570545	0.704571	0.592463	0.754023	0.257841	0.336443	0.391729	0.282435	0.279053	0.274318	0.24185	0.380219	0.337699	0.464309	0.451002	0.270139	0.361646	0.359963	0.318352	0.367488	0.398523	0.341687	0.336759	0.300345	0.389324	0.352285	0.317521	0.392011	0.313364
38.239	0.696422	0.750906	0.682019	0.593534	0.609287	0.712466	0.663088	0.700438	0.683085	0.728047	0.637618	0.70322	0.708493	0.603126	0.687403	0.636622	0.599181	0.621026	0.578241	0.719664	0.58579	0.700954	0.592366	0.769033	0.276489	0.342108	0.403921	0.283688	0.309678	0.291782	0.235923	0.402963	0.334314	0.464	0.499784	0.295152	0.34105	0.34586	0.328303	0.353862	0.409932	0.34444	0.336947	0.309473	0.386653	0.363871	0.318836	0.40396	0.317649
38.438	0.684148	0.713199	0.669239	0.573889	0.571952	0.701456	0.65187	0.686058	0.660008	0.704518	0.639544	0.67879	0.722004	0.619221	0.669067	0.640477	0.612469	0.618383	0.585338	0.709534	0.562243	0.698706	0.568374	0.765177	0.263635	0.378556	0.409777	0.284587	0.275357	0.287106	0.239765	0.374191	0.342121	0.447608	0.474037	0.304476	0.344535	0.328463	0.336464	0.376154	0.39754	0.345484	0.337891	0.301771	0.378386	0.370066	0.330022	0.399434	0.313113
38.638	0.691479	0.735229	0.669935	0.597813	0.587921	0.721337	0.648276	0.686079	0.671333	0.705653	0.641102	0.701591	0.710448	0.609543	0.68382	0.627911	0.613238	0.624548	0.565967	0.7183	0.609237	0.711907	0.580109	0.769437	0.282642	0.357835	0.401005	0.281358	0.27622	0.295324	0.252993	0.385008	0.341375	0.445548	0.48497	0.295402	0.366751	0.345839	0.360138	0.355917	0.413665	0.349542	0.337701	0.29491	0.376443	0.357379	0.321478	0.39416	0.306896
38.839	0.708124	0.715256	0.682595	0.572607	0.599839	0.721284	0.662022	0.701006	0.651504	0.706149	0.641949	0.684267	0.709918	0.613686	0.657911	0.62758	0.576228	0.616757	0.565892	0.695542	0.576305	0.68989	0.584035	0.761698	0.273895	0.358718	0.40083	0.277785	0.300418	0.276329	0.251829	0.391512	0.332886	0.463366	0.489391	0.285206	0.35194	0.3269	0.374062	0.353148	0.396232	0.34496	0.336396	0.296347	0.386802	0.360851	0.305711	0.390642	0.317158
39.038	0.723609	0.717284	0.688176	0.591114	0.599372	0.704947	0.667573	0.692967	0.646498	0.701189	0.641173	0.682355	0.730548	0.617148	0.682349	0.641542	0.599848	0.602591	0.57708	0.679018	0.585863	0.711066	0.568155	0.756431	0.268428	0.350812	0.396728	0.272404	0.307893	0.283885	0.251174	0.399929	0.34216	0.460299	0.483068	0.27651	0.366835	0.343436	0.365117	0.367175	0.394669	0.347803	0.334196	0.295727	0.392827	0.360279	0.328364	0.393144	0.312805
39.238	0.742891	0.73222	0.654112	0.610597	0.596032	0.727991	0.679806	0.715196	0.658005	0.705442	0.633511	0.673102	0.73606	0.600194	0.678689	0.630115	0.634778	0.637747	0.578876	0.719541	0.607168	0.731085	0.592722	0.757819	0.275324	0.372271	0.410386	0.28724	0.332165	0.288636	0.251404	0.401182	0.339447	0.470774	0.498206	0.299238	0.369569	0.355682	0.371801	0.371141	0.410361	0.33657	0.336131	0.309525	0.398374	0.355626	0.321418	0.393626	0.31895
39.439	0.709408	0.706095	0.695384	0.611238	0.622967	0.708498	0.656313	0.700075	0.659768	0.68317	0.624118	0.658055	0.718677	0.611568	0.683753	0.64521	0.619048	0.631959	0.5796	0.712286	0.600577	0.735152	0.581116	0.775898	0.268085	0.362468	0.394319	0.283432	0.300581	0.26969	0.246441	0.351792	0.334304	0.450314	0.471759	0.304513	0.361539	0.33657	0.35394	0.378949	0.404829	0.342909	0.342236	0.310885	0.386854	0.358452	0.338475	0.396971	0.311972
39.638	0.700354	0.733338	0.687823	0.611841	0.625299	0.726433	0.671328	0.694061	0.676035	0.714244	0.646208	0.688864	0.749371	0.634296	0.696323	0.657132	0.617509	0.614077	0.572322	0.704925	0.606086	0.7139	0.564183	0.75552	0.268436	0.339369	0.399655	0.284871	0.311093	0.28775	0.249084	0.410142	0.332662	0.424951	0.462237	0.29976	0.343892	0.340469	0.332745	0.360675	0.396969	0.344851	0.345463	0.291559	0.399359	0.363049	0.3346	0.408411	0.311533
39.838	0.687787	0.721339	0.701098	0.594073	0.610231	0.713926	0.652223	0.683048	0.666751	0.715056	0.635875	0.686914	0.705159	0.624698	0.675683	0.623207	0.624611	0.633264	0.580069	0.713309	0.607236	0.733903	0.572126	0.776908	0.273475	0.34339	0.395325	0.283188	0.306625	0.272433	0.237419	0.395965	0.353956	0.471444	0.491819	0.285765	0.372169	0.343533	0.379855	0.360998	0.414524	0.342404	0.331821	0.297643	0.401956	0.359103	0.327091	0.411682	0.311785
40.039	0.704517	0.701934	0.678282	0.610412	0.581694	0.70291	0.654384	0.704075	0.682719	0.707119	0.619365	0.672026	0.72081	0.634694	0.668584	0.652776	0.624336	0.626836	0.575724	0.709059	0.600932	0.709008	0.564247	0.772323	0.262621	0.344802	0.399719	0.282024	0.2647	0.270696	0.254917	0.391342	0.333285	0.463056	0.485091	0.307926	0.369404	0.334052	0.363189	0.356074	0.400161	0.338948	0.341966	0.308761	0.401627	0.367993	0.323396	0.38667	0.317203
40.238	0.712407	0.697284	0.680173	0.598216	0.618722	0.703546	0.667945	0.704224	0.668551	0.709799	0.642766	0.685457	0.705333	0.609085	0.678015	0.652289	0.615744	0.653673	0.571457	0.69775	0.607543	0.708767	0.572911	0.762967	0.272518	0.361935	0.397816	0.280643	0.328195	0.267633	0.244298	0.402918	0.334496	0.450366	0.484729	0.260399	0.385161	0.329538	0.339751	0.34485	0.400834	0.339531	0.33542	0.298995	0.38651	0.360141	0.329272	0.399059	0.327044
40.438	0.684149	0.703537	0.712956	0.610628	0.623048	0.723972	0.663348	0.713379	0.696673	0.730231	0.670122	0.691739	0.729457	0.637262	0.688298	0.655507	0.583558	0.611768	0.556786	0.687861	0.58151	0.688315	0.571249	0.75309	0.270157	0.33803	0.403004	0.277547	0.311597	0.257732	0.24232	0.391916	0.335963	0.438963	0.484778	0.28601	0.351633	0.331531	0.371287	0.360793	0.399656	0.337671	0.335332	0.284136	0.392354	0.358919	0.336342	0.390202	0.32358
40.639	0.702923	0.710268	0.685793	0.575455	0.60083	0.71683	0.654435	0.70945	0.689065	0.756941	0.678434	0.709109	0.745034	0.642365	0.712554	0.68436	0.584969	0.621176	0.559904	0.708861	0.600535	0.707842	0.560705	0.755941	0.269305	0.345799	0.40538	0.281338	0.305687	0.271774	0.246994	0.384058	0.322617	0.451319	0.48156	0.281211	0.366005	0.360251	0.357195	0.362386	0.388397	0.335437	0.332318	0.302941	0.376205	0.371432	0.313378	0.384603	0.323037
41.638	0.684094	0.709239	0.6765	0.633653	0.598675	0.718982	0.64848	0.713062	0.656868	0.687043	0.652911	0.693641	0.761371	0.63779	0.683982	0.656569	0.631688	0.635354	0.573894	0.712937	0.615346	0.702793	0.577899	0.784088	0.282629	0.375377	0.409148	0.280727	0.346112	0.285994	0.252311	0.371475	0.340024	0.425337	0.462177	0.289175	0.353619	0.353846	0.34992	0.378383	0.393493	0.356663	0.34126	0.278	0.395623	0.360108	0.324681	0.406605	0.314504
42.639	0.705944	0.728113	0.649531	0.610634	0.608358	0.722632	0.668179	0.694336	0.691107	0.694594	0.677458	0.726747	0.754182	0.640953	0.688177	0.65583	0.612011	0.628046	0.578117	0.720946	0.588329	0.699358	0.570292	0.760325	0.266001	0.367571	0.41534	0.285458	0.326291	0.245941	0.244228	0.37128	0.344644	0.464547	0.466051	0.286543	0.362739	0.34831	0.354008	0.356315	0.410472	0.348868	0.343472	0.296554	0.409988	0.374123	0.345378	0.399673	0.319813
43.638	0.721813	0.744988	0.682615	0.590554	0.614562	0.699924	0.642056	0.708875	0.669472	0.684271	0.671046	0.712401	0.747389	0.605992	0.682111	0.649108	0.613548	0.622293	0.573063	0.710714	0.616411	0.718578	0.574465	0.749915	0.275225	0.321814	0.421138	0.284848	0.302879	0.273256	0.22875	0.394432	0.338393	0.449379	0.470698	0.24866	0.352369	0.334264	0.344322	0.351229	0.397701	0.345831	0.333475	0.29045	0.373715	0.372489	0.305431	0.394706	0.316698
44.638	0.729121	0.778982	0.697914	0.624967	0.61571	0.761518	0.660344	0.726474	0.686162	0.677978	0.642331	0.700657	0.738424	0.616433	0.678776	0.648882	0.642303	0.607814	0.559596	0.700602	0.601673	0.696974	0.584336	0.752929	0.271534	0.350286	0.419891	0.292322	0.324258	0.280668	0.249848	0.384793	0.353758	0.446031	0.474341	0.260343	0.369088	0.343477	0.354002	0.366023	0.394451	0.33722	0.33872	0.298204	0.385996	0.374762	0.323622	0.408392	0.318205
45.639	0.707473	0.743518	0.657826	0.596377	0.619541	0.747479	0.646738	0.713262	0.65635	0.69565	0.629782	0.727555	0.737619	0.606036	0.676643	0.644633	0.597485	0.616938	0.567681	0.700998	0.608723	0.694291	0.587195	0.756791	0.271231	0.358473	0.419266	0.285888	0.359378	0.283154	0.247582	0.390001	0.358708	0.442378	0.475148	0.290803	0.353255	0.364572	0.360264	0.366468	0.391003	0.336008	0.333244	0.289788	0.394403	0.365257	0.33344	0.401949	0.317283
46.638	0.709277	0.733063	0.66702	0.623796	0.620368	0.709533	0.667706	0.706229	0.67941	0.727583	0.665291	0.688582	0.744786	0.592269	0.695026	0.659288	0.613257	0.635068	0.574244	0.719172	0.606038	0.682944	0.603878	0.756318	0.280825	0.357031	0.417337	0.29771	0.268877	0.274863	0.242705	0.399996	0.340205	0.454594	0.478721	0.275793	0.391424	0.336363	0.380462	0.35859	0.39803	0.337596	0.33297	0.297914	0.393314	0.372867	0.329158	0.39313	0.317227
47.639	0.700195	0.721778	0.675337	0.578466	0.62663	0.707985	0.671113	0.706282	0.676962	0.699625	0.653795	0.722948	0.760688	0.620801	0.688421	0.657633	0.613901	0.600098	0.564741	0.725008	0.605339	0.70972	0.583105	0.765148	0.277624	0.364532	0.407395	0.282888	0.310019	0.272934	0.242384	0.401643	0.337961	0.432411	0.47279	0.278376	0.353256	0.3279	0.349609	0.365328	0.385764	0.33995	0.332929	0.299699	0.383783	0.380456	0.322975	0.388154	0.32113
48.638	0.688616	0.715884	0.653728	0.588261	0.596857	0.691705	0.653256	0.692863	0.693315	0.709014	0.64532	0.729013	0.724661	0.621026	0.675051	0.662309	0.615913	0.607911	0.581214	0.692304	0.593607	0.700515	0.581474	0.734516	0.274498	0.363457	0.425028	0.286863	0.306775	0.280645	0.248097	0.378038	0.337533	0.435754	0.495028	0.28421	0.365485	0.356136	0.363305	0.345775	0.393346	0.351634	0.340666	0.311722	0.392771	0.373965	0.326241	0.394701	0.320406
49.638	0.686913	0.713658	0.679242	0.593201	0.611802	0.716312	0.64448	0.708604	0.69165	0.705654	0.668686	0.755676	0.758935	0.598598	0.691757	0.654181	0.63248	0.637829	0.599772	0.7197	0.614596	0.712393	0.593781	0.768443	0.288044	0.357989	0.416038	0.282527	0.318248	0.277813	0.236667	0.382213	0.334303	0.434917	0.478864	0.2766	0.366975	0.322366	0.349717	0.357541	0.403363	0.34484	0.337592	0.294203	0.390838	0.379792	0.347583	0.396578	0.321677
50.639	0.68736	0.728626	0.686336	0.583936	0.617292	0.697266	0.672574	0.68848	0.698086	0.698066	0.655296	0.723983	0.736184	0.603271	0.692531	0.689547	0.631972	0.627829	0.59216	0.723974	0.614509	0.677817	0.588219	0.769424	0.271773	0.352237	0.422428	0.282294	0.293246	0.285567	0.231573	0.405294	0.343938	0.43795	0.469502	0.284071	0.381817	0.312187	0.332845	0.352006	0.386198	0.337727	0.329664	0.300769	0.386579	0.361046	0.327841	0.394823	0.322896
51.638	0.687747	0.779477	0.68998	0.606482	0.630791	0.703938	0.651389	0.706703	0.689407	0.735145	0.670297	0.712002	0.761813	0.613569	0.697437	0.667012	0.623014	0.638334	0.586289	0.71898	0.595452	0.703634	0.598528	0.771526	0.265273	0.369303	0.418134	0.281343	0.311715	0.282826	0.245489	0.406577	0.332819	0.438739	0.470256	0.263891	0.344873	0.330073	0.344671	0.338257	0.413498	0.340457	0.328261	0.296499	0.394934	0.391363	0.341028	0.402278	0.325071
52.639	0.707993	0.776952	0.700274	0.591262	0.615001	0.725287	0.681123	0.673537	0.690777	0.682331	0.65606	0.719419	0.746283	0.647376	0.68658	0.676754	0.619716	0.616604	0.567113	0.716696	0.592453	0.6946	0.583433	0.747272	0.264057	0.343757	0.418075	0.279965	0.293133	0.263272	0.244356	0.380756	0.355029	0.452332	0.482859	0.25051	0.377634	0.362467	0.341786	0.36333	0.407935	0.337171	0.335588	0.311509	0.385471	0.380779	0.352479	0.390551	0.316164
53.638	0.703112	0.789375	0.706797	0.605299	0.609077	0.728001	0.671706	0.712697	0.695921	0.708785	0.660751	0.726876	0.732485	0.658969	0.683631	0.673756	0.635029	0.640516	0.589593	0.731914	0.605877	0.691583	0.611158	0.776535	0.28034	0.371462	0.434702	0.295058	0.33122	0.28365	0.253069	0.410661	0.343921	0.444155	0.494484	0.274161	0.395339	0.354481	0.372557	0.358423	0.399709	0.335605	0.326476	0.304862	0.387474	0.376169	0.330636	0.384868	0.326443
54.638	0.696983	0.745566	0.697025	0.619324	0.636456	0.710686	0.671231	0.694916	0.697809	0.71379	0.648224	0.7071	0.74073	0.633675	0.696011	0.694319	0.606335	0.652132	0.595693	0.72505	0.628858	0.700563	0.594494	0.771588	0.274361	0.362357	0.424783	0.290626	0.304272	0.287011	0.241457	0.372912	0.329084	0.432521	0.493259	0.289171	0.421974	0.337144	0.345227	0.340135	0.400475	0.349124	0.34027	0.296774	0.388612	0.360437	0.326107	0.3867	0.318239
55.639	0.69791	0.770701	0.709994	0.591498	0.623412	0.716643	0.655429	0.716971	0.697079	0.686388	0.664695	0.688303	0.734708	0.607586	0.679249	0.678812	0.627266	0.658663	0.598501	0.737067	0.633581	0.729254	0.582412	0.778802	0.268506	0.386468	0.43047	0.288584	0.343784	0.280527	0.242644	0.401418	0.329063	0.430801	0.485855	0.271419	0.375814	0.348737	0.348588	0.33762	0.401727	0.351514	0.32616	0.293007	0.405079	0.374598	0.331195	0.401645	0.323656
56.638	0.688343	0.73938	0.686512	0.585058	0.63036	0.713131	0.640992	0.678465	0.697898	0.715019	0.648985	0.705946	0.713725	0.621305	0.664973	0.656503	0.622422	0.61796	0.59107	0.76374	0.60478	0.717519	0.588531	0.779865	0.275461	0.392353	0.425074	0.278693	0.29173	0.27949	0.233883	0.397119	0.338626	0.431931	0.488278	0.283095	0.383417	0.320489	0.345943	0.33027	0.399001	0.34502	0.328953	0.301275	0.370795	0.372872	0.340144	0.386335	0.329118
57.638	0.731104	0.764758	0.686099	0.610111	0.634154	0.721946	0.675177	0.698293	0.698221	0.691155	0.644691	0.701484	0.712145	0.624537	0.667475	0.665797	0.613352	0.609034	0.586578	0.715375	0.592694	0.678885	0.590037	0.782473	0.284415	0.393244	0.450077	0.288121	0.31329	0.268462	0.255685	0.406025	0.342431	0.425535	0.491215	0.290768	0.392437	0.32915	0.351001	0.348468	0.412537	0.349819	0.338365	0.302136	0.389357	0.374928	0.331221	0.39422	0.331257
58.638	0.700507	0.748962	0.697709	0.605856	0.65029	0.723767	0.669357	0.704937	0.709162	0.720067	0.649719	0.717748	0.734128	0.632532	0.69157	0.673279	0.6021	0.615725	0.583005	0.720701	0.601837	0.698964	0.597424	0.788777	0.278915	0.38195	0.439456	0.283837	0.328395	0.296184	0.247239	0.4056	0.355233	0.442505	0.489773	0.263106	0.379702	0.339292	0.377964	0.338134	0.415555	0.348303	0.331445	0.307773	0.392943	0.362127	0.335353	0.38832	0.335325
59.638	0.689951	0.713619	0.68415	0.570793	0.609962	0.71898	0.648771	0.698348	0.690543	0.704606	0.666507	0.716889	0.739229	0.631999	0.68622	0.666735	0.625336	0.643942	0.579338	0.729717	0.597285	0.707343	0.60226	0.798631	0.291658	0.385331	0.433398	0.287448	0.32139	0.291128	0.25636	0.409205	0.346544	0.434627	0.482895	0.263113	0.398377	0.343925	0.362392	0.352712	0.385769	0.339315	0.325933	0.298694	0.389524	0.358854	0.329059	0.392292	0.325451
60.639	0.696942	0.740056	0.711977	0.595822	0.667689	0.712639	0.659093	0.671842	0.721606	0.719966	0.687468	0.696723	0.761818	0.612807	0.702859	0.678689	0.646503	0.639192	0.588182	0.7319	0.622691	0.725095	0.596982	0.799836	0.282437	0.374479	0.436078	0.2791	0.331324	0.283875	0.24592	0.43698	0.353322	0.443331	0.513845	0.290096	0.37078	0.34763	0.363649	0.359832	0.413794	0.349388	0.339066	0.311347	0.387441	0.378002	0.329274	0.395322	0.314008
61.638	0.725919	0.766232	0.693015	0.61284	0.680001	0.732103	0.667671	0.716423	0.690174	0.699858	0.651681	0.718673	0.748771	0.641528	0.692018	0.671256	0.655697	0.637288	0.587614	0.726557	0.631021	0.708587	0.6014	0.779142	0.281092	0.347988	0.43033	0.290607	0.329906	0.294014	0.247861	0.412815	0.356732	0.425126	0.498889	0.250752	0.407043	0.364435	0.363137	0.362486	0.415825	0.344028	0.341975	0.322186	0.406858	0.379918	0.341891	0.391395	0.319926
62.639	0.716143	0.772087	0.712351	0.613226	0.661095	0.7372	0.69262	0.714471	0.724972	0.759405	0.701585	0.73462	0.751537	0.652916	0.703255	0.685816	0.600591	0.610216	0.57972	0.698778	0.593259	0.688517	0.601862	0.761206	0.263781	0.362373	0.432054	0.28967	0.318281	0.293393	0.244199	0.411603	0.344978	0.439285	0.473077	0.260124	0.379932	0.343303	0.349861	0.3316	0.421165	0.350664	0.34419	0.317878	0.392274	0.382758	0.337804	0.399405	0.32375
63.638	0.722394	0.753763	0.672381	0.598429	0.640778	0.722419	0.677668	0.686491	0.71272	0.746936	0.670191	0.713516	0.728381	0.621272	0.692283	0.676028	0.620593	0.624294	0.582827	0.702409	0.618271	0.715647	0.58146	0.771198	0.28582	0.378192	0.44181	0.283511	0.318328	0.285782	0.263621	0.40661	0.356115	0.432228	0.490621	0.277473	0.375735	0.355	0.367125	0.34392	0.415382	0.352049	0.346115	0.307483	0.382252	0.37394	0.333502	0.389233	0.314372
64.638	0.713093	0.763796	0.711808	0.595967	0.658886	0.730336	0.691085	0.695629	0.745724	0.733618	0.702302	0.731438	0.763592	0.647344	0.695641	0.690066	0.626643	0.649419	0.597857	0.7045	0.608235	0.703577	0.592966	0.789827	0.274117	0.376896	0.448097	0.284842	0.28302	0.28338	0.25532	0.407705	0.336294	0.452918	0.512792	0.281505	0.364823	0.334837	0.370555	0.34551	0.399786	0.350036	0.343003	0.305819	0.380674	0.379344	0.337367	0.399958	0.323237
65.639	0.706705	0.752733	0.690435	0.601252	0.652575	0.712049	0.684777	0.69446	0.722521	0.767192	0.707892	0.71744	0.747474	0.658297	0.692791	0.686731	0.61383	0.644134	0.608399	0.752075	0.628478	0.718312	0.612054	0.791713	0.273805	0.366201	0.435327	0.289163	0.280885	0.279441	0.240148	0.383333	0.345482	0.467168	0.526507	0.268227	0.376427	0.349638	0.344697	0.339175	0.400918	0.353696	0.333927	0.314453	0.36566	0.372189	0.326989	0.388607	0.318136
66.638	0.696254	0.748062	0.677369	0.595855	0.641234	0.729093	0.678044	0.677648	0.759916	0.740347	0.673494	0.739908	0.775534	0.616699	0.693839	0.681436	0.611227	0.62354	0.594068	0.715527	0.628968	0.708165	0.590828	0.783567	0.2789	0.336866	0.437492	0.290376	0.291424	0.271318	0.253305	0.391668	0.354491	0.439383	0.502601	0.279337	0.399682	0.338396	0.33995	0.352505	0.406967	0.350388	0.348729	0.303198	0.388475	0.380545	0.350726	0.404515	0.323219
67.638	0.691875	0.733973	0.690378	0.59135	0.623803	0.71329	0.68368	0.698374	0.742476	0.754417	0.683999	0.717257	0.750802	0.640534	0.702896	0.686322	0.59228	0.624885	0.603092	0.73247	0.631406	0.697791	0.61713	0.762687	0.282001	0.382415	0.447503	0.291425	0.282732	0.294135	0.245705	0.39699	0.346216	0.417782	0.509356	0.301037	0.376963	0.349327	0.367001	0.358303	0.418946	0.351566	0.343196	0.310813	0.364817	0.38081	0.365361	0.408599	0.320971
68.639	0.715167	0.763003	0.669672	0.605188	0.639356	0.732752	0.681718	0.703303	0.736615	0.743564	0.671329	0.719759	0.746492	0.632565	0.693159	0.670733	0.589159	0.647082	0.612078	0.731589	0.638324	0.739865	0.588937	0.78856	0.275247	0.345345	0.443181	0.280286	0.297369	0.270733	0.251857	0.391172	0.361603	0.432835	0.490956	0.260324	0.398857	0.343838	0.36296	0.347373	0.407125	0.348478	0.343637	0.29064	0.371237	0.365913	0.34307	0.403617	0.330763
69.638	0.722138	0.747951	0.690842	0.609814	0.66022	0.708603	0.677733	0.701292	0.714844	0.707814	0.636854	0.692752	0.73812	0.631383	0.711318	0.682893	0.629034	0.640662	0.601591	0.738625	0.638894	0.739999	0.601672	0.77132	0.282904	0.344783	0.443535	0.280976	0.257061	0.2751	0.239637	0.380726	0.346772	0.423392	0.483278	0.275277	0.344073	0.329108	0.341705	0.307746	0.40858	0.34962	0.341919	0.308739	0.377938	0.37542	0.33891	0.405309	0.32322
70.639	0.679037	0.745552	0.674924	0.607767	0.620901	0.726661	0.681832	0.678826	0.727562	0.723266	0.686859	0.700894	0.760927	0.623741	0.704184	0.692506	0.630013	0.660257	0.61383	0.725334	0.644414	0.731567	0.606196	0.766379	0.288478	0.36344	0.458687	0.289542	0.296562	0.289935	0.247413	0.383548	0.346842	0.430709	0.481656	0.253298	0.363969	0.338517	0.358115	0.346003	0.418541	0.350172	0.350503	0.309828	0.378948	0.384992	0.359496	0.422039	0.314789
71.638	0.712136	0.7169	0.688871	0.615462	0.624798	0.675422	0.658357	0.699219	0.735622	0.733312	0.681498	0.709212	0.763682	0.652255	0.684621	0.69033	0.62459	0.614845	0.591259	0.705472	0.646828	0.717262	0.595879	0.728215	0.28729	0.360561	0.453194	0.285569	0.302263	0.284703	0.236948	0.3955	0.353469	0.413904	0.486668	0.267203	0.366344	0.320111	0.355292	0.355114	0.402136	0.362198	0.351187	0.309854	0.369574	0.370617	0.358401	0.418975	0.320851
72.638	0.680647	0.783426	0.695624	0.624371	0.663035	0.730453	0.673965	0.733209	0.742204	0.75647	0.651326	0.6966	0.749512	0.635698	0.683912	0.656757	0.628411	0.636916	0.599791	0.718378	0.645408	0.709949	0.581961	0.736187	0.28176	0.340154	0.446738	0.287439	0.25905	0.283154	0.235448	0.377576	0.363123	0.445574	0.511294	0.283532	0.384673	0.366299	0.334439	0.341233	0.40482	0.359637	0.34156	0.311584	0.371185	0.374811	0.352444	0.408378	0.31659
73.639	0.715478	0.765964	0.6809	0.604636	0.608937	0.71296	0.683927	0.703688	0.746736	0.743734	0.681303	0.740175	0.744464	0.641529	0.696003	0.689736	0.62217	0.644857	0.608026	0.734498	0.62643	0.718397	0.601248	0.747815	0.270368	0.374784	0.458042	0.29395	0.267873	0.279005	0.249491	0.409927	0.370472	0.434065	0.494653	0.289394	0.392347	0.335339	0.356635	0.345624	0.401347	0.356891	0.345103	0.310094	0.369254	0.379241	0.346372	0.414574	0.310546
74.638	0.688299	0.745066	0.685959	0.588257	0.615183	0.709339	0.669167	0.730718	0.715247	0.716958	0.677818	0.69919	0.744052	0.608752	0.691954	0.666123	0.599462	0.621581	0.596619	0.709519	0.643637	0.719365	0.595477	0.723144	0.272635	0.357482	0.461396	0.286626	0.30558	0.279328	0.244203	0.403316	0.362703	0.445842	0.488433	0.277438	0.390339	0.338702	0.343244	0.367317	0.386029	0.359891	0.343874	0.302177	0.391117	0.38683	0.342984	0.411686	0.303538
75.639	0.708079	0.778677	0.707991	0.607229	0.656129	0.746168	0.688128	0.745654	0.742878	0.72418	0.650639	0.742911	0.74032	0.624159	0.691441	0.685719	0.629007	0.599632	0.599886	0.736304	0.639984	0.725684	0.59089	0.757949	0.278778	0.364407	0.45802	0.284697	0.308877	0.291084	0.245758	0.391748	0.36892	0.428693	0.500078	0.270757	0.400658	0.351036	0.355437	0.356767	0.403097	0.349362	0.338335	0.308965	0.362716	0.383948	0.335333	0.413198	0.317222
76.638	0.689312	0.76848	0.692585	0.625956	0.64886	0.742218	0.65378	0.706939	0.715527	0.73431	0.654381	0.696678	0.742648	0.603885	0.676374	0.662018	0.603424	0.606252	0.594532	0.71041	0.611027	0.711748	0.583086	0.747986	0.27109	0.38233	0.455275	0.282031	0.295911	0.296938	0.245644	0.377362	0.36014	0.432136	0.485027	0.269957	0.39331	0.353981	0.374341	0.343999	0.424603	0.358543	0.339985	0.306036	0.38425	0.385088	0.36365	0.410436	0.317949
77.638	0.662955	0.748604	0.681076	0.616122	0.655927	0.728828	0.659893	0.725157	0.723133	0.677369	0.641641	0.69573	0.735821	0.602998	0.666457	0.652605	0.619737	0.61867	0.599842	0.721839	0.618164	0.715189	0.587622	0.768987	0.279338	0.382686	0.466694	0.283536	0.272659	0.28346	0.247779	0.410614	0.363747	0.415741	0.48368	0.276411	0.370081	0.331696	0.356473	0.346806	0.41608	0.364335	0.342976	0.318249	0.379039	0.390749	0.361031	0.427704	0.305716
78.639	0.695911	0.73847	0.663238	0.602192	0.620598	0.722249	0.658339	0.69672	0.720769	0.717376	0.654119	0.728785	0.734032	0.632554	0.687037	0.680701	0.630937	0.623002	0.595923	0.729791	0.644657	0.741481	0.590622	0.766626	0.270599	0.343619	0.454725	0.278311	0.285956	0.276952	0.240775	0.389361	0.368016	0.405168	0.492049	0.296807	0.378043	0.334321	0.34437	0.359428	0.411542	0.356683	0.332773	0.317194	0.388706	0.392758	0.361324	0.421878	0.312091
79.638	0.696621	0.780021	0.708966	0.611818	0.621047	0.7477	0.660713	0.693822	0.732698	0.700287	0.67342	0.72223	0.764851	0.59751	0.689437	0.672049	0.619701	0.624581	0.59242	0.717701	0.623138	0.717416	0.594895	0.714883	0.272667	0.352851	0.451585	0.290262	0.303199	0.278513	0.250409	0.384646	0.36202	0.421648	0.495047	0.265479	0.392484	0.333727	0.337327	0.347584	0.402822	0.351909	0.329697	0.304173	0.384307	0.380977	0.352895	0.413913	0.314327
80.639	0.700001	0.788062	0.67437	0.626675	0.619447	0.73692	0.665724	0.696831	0.742349	0.73637	0.646086	0.723794	0.733317	0.627124	0.689152	0.698323	0.62844	0.631516	0.589358	0.7284	0.625803	0.702751	0.598648	0.754765	0.269331	0.35461	0.441474	0.292187	0.296735	0.281532	0.24368	0.392555	0.352287	0.419771	0.511996	0.270711	0.382488	0.345198	0.338946	0.360431	0.423016	0.363016	0.346601	0.328855	0.377508	0.392297	0.387978	0.450528	0.32506
81.638	0.716228	0.770597	0.691191	0.628718	0.64679	0.747492	0.669292	0.711835	0.747546	0.710631	0.661611	0.698366	0.733027	0.586459	0.690894	0.675267	0.630429	0.612029	0.593793	0.715058	0.637117	0.692254	0.594499	0.724108	0.280269	0.356958	0.455585	0.288617	0.298577	0.279248	0.236806	0.402583	0.360676	0.421324	0.496588	0.284544	0.408038	0.351887	0.347299	0.34595	0.414564	0.349374	0.336362	0.320356	0.383283	0.363869	0.352099	0.43712	0.313612
82.638	0.677892	0.785846	0.710295	0.605654	0.661233	0.764484	0.663273	0.73248	0.758923	0.72051	0.651159	0.716207	0.768005	0.637184	0.711967	0.682174	0.634357	0.643084	0.60271	0.7465	0.645995	0.720736	0.60691	0.757989	0.273325	0.379491	0.469533	0.292255	0.292182	0.274561	0.246794	0.408424	0.3725	0.436537	0.502579	0.284835	0.423782	0.350789	0.373645	0.34946	0.41576	0.361716	0.342799	0.327218	0.381075	0.377253	0.376186	0.44185	0.332017
83.639	0.685387	0.771023	0.700038	0.614297	0.652307	0.721589	0.643091	0.694384	0.773501	0.724248	0.653186	0.712466	0.771146	0.633645	0.723595	0.673674	0.614055	0.647192	0.592996	0.735258	0.635861	0.713694	0.608212	0.738596	0.276941	0.355418	0.451642	0.282985	0.31972	0.272701	0.245265	0.412329	0.361403	0.419196	0.486624	0.290353	0.40962	0.334223	0.353112	0.373094	0.399743	0.352572	0.348111	0.304811	0.371605	0.387217	0.34565	0.452195	0.330003
84.638	0.679169	0.751699	0.693723	0.59042	0.637671	0.717671	0.671736	0.690608	0.750346	0.714381	0.655316	0.741387	0.744095	0.624871	0.729858	0.698081	0.612643	0.64106	0.608503	0.730308	0.627802	0.736151	0.613876	0.747122	0.282665	0.350241	0.471056	0.288078	0.342687	0.291307	0.24534	0.398868	0.370807	0.426607	0.512684	0.235475	0.378774	0.329814	0.35868	0.362177	0.402574	0.346248	0.343166	0.316489	0.376455	0.383245	0.349697	0.452757	0.32166
85.639	0.709353	0.783614	0.69854	0.618658	0.669607	0.774998	0.669216	0.719465	0.719116	0.701676	0.654654	0.71273	0.710908	0.6117	0.700114	0.679038	0.616124	0.626398	0.597302	0.729907	0.637915	0.746766	0.615358	0.756755	0.283118	0.335503	0.46363	0.287182	0.283812	0.285718	0.241177	0.384682	0.361943	0.409531	0.478728	0.282958	0.360942	0.333824	0.33247	0.350643	0.404688	0.354195	0.354153	0.310211	0.398024	0.401754	0.361348	0.457287	0.31233
86.638	0.711285	0.762509	0.698671	0.592976	0.677645	0.758326	0.664229	0.706088	0.748978	0.732833	0.667235	0.712396	0.771664	0.661727	0.694779	0.668026	0.605793	0.623754	0.587154	0.733559	0.636673	0.735318	0.611623	0.776196	0.274156	0.369586	0.473493	0.292401	0.286433	0.282517	0.241356	0.379028	0.359331	0.414893	0.507467	0.274986	0.41266	0.342669	0.363111	0.361386	0.418843	0.350686	0.349231	0.31412	0.392443	0.381144	0.35102	0.444923	0.32331
87.638	0.694326	0.749349	0.691525	0.603545	0.656574	0.75896	0.696271	0.69868	0.727019	0.678692	0.627806	0.69094	0.739266	0.63581	0.695798	0.680385	0.620957	0.633214	0.588822	0.720998	0.649409	0.73604	0.601777	0.762754	0.283973	0.340544	0.465336	0.283256	0.306737	0.28323	0.242862	0.418389	0.355581	0.428044	0.49666	0.267643	0.400954	0.357647	0.391079	0.36921	0.41317	0.347337	0.340976	0.321347	0.389641	0.374419	0.348526	0.45827	0.315734
88.639	0.718295	0.775254	0.689463	0.60331	0.665122	0.724103	0.681473	0.687972	0.736317	0.730928	0.66115	0.714124	0.751753	0.632294	0.696715	0.684018	0.616889	0.638033	0.594493	0.730302	0.640124	0.759345	0.602188	0.780284	0.272414	0.347121	0.470185	0.287144	0.295675	0.286027	0.241646	0.40872	0.355166	0.424509	0.524117	0.260167	0.410312	0.363204	0.369388	0.352776	0.415127	0.346993	0.345532	0.318582	0.380245	0.391188	0.368124	0.445326	0.318576
89.638	0.726819	0.770738	0.676891	0.614333	0.681732	0.738544	0.674404	0.712918	0.750997	0.733501	0.645932	0.72064	0.786208	0.629941	0.705796	0.680273	0.621381	0.631792	0.598813	0.712545	0.631393	0.733279	0.591989	0.769268	0.276743	0.347659	0.469981	0.290721	0.256675	0.291355	0.248016	0.413786	0.373455	0.410005	0.479916	0.244032	0.408967	0.364011	0.350168	0.344333	0.412064	0.346337	0.353372	0.318841	0.401946	0.397529	0.369845	0.466942	0.321641
90.639	0.701269	0.744486	0.690121	0.622825	0.68656	0.731044	0.689433	0.725419	0.770223	0.743894	0.662328	0.741003	0.78086	0.62767	0.707845	0.704862	0.608215	0.635091	0.605619	0.748218	0.62125	0.745366	0.600429	0.766989	0.275944	0.379215	0.467332	0.290911	0.299459	0.29968	0.244811	0.413438	0.366928	0.416317	0.52515	0.251342	0.415317	0.361195	0.366531	0.354755	0.413712	0.353306	0.359082	0.318821	0.397768	0.391699	0.375307	0.459718	0.326781
91.638	0.694883	0.764715	0.705502	0.605362	0.662064	0.746759	0.699552	0.711165	0.760483	0.721242	0.649953	0.70961	0.742341	0.624721	0.711246	0.679713	0.609548	0.617651	0.570859	0.693057	0.615854	0.729911	0.586433	0.717171	0.284524	0.368751	0.477242	0.286983	0.291553	0.282642	0.247445	0.419142	0.375395	0.412793	0.494074	0.247535	0.379473	0.34601	0.365763	0.365778	0.425551	0.350235	0.356467	0.316908	0.389304	0.390576	0.367594	0.464629	0.32413
92.638	0.724364	0.788938	0.718381	0.645301	0.671953	0.731995	0.692705	0.72481	0.794316	0.743512	0.633002	0.693796	0.761906	0.64165	0.719289	0.700123	0.630465	0.618658	0.579505	0.713375	0.643352	0.705135	0.584294	0.7346	0.279118	0.354825	0.481725	0.289232	0.312151	0.286973	0.258996	0.399498	0.359228	0.427911	0.507401	0.260855	0.381027	0.327481	0.339452	0.366591	0.415352	0.34939	0.357237	0.324973	0.381589	0.396498	0.362082	0.463388	0.316326
93.639	0.731411	0.777521	0.710888	0.636542	0.664981	0.740836	0.674377	0.72387	0.770928	0.760822	0.670267	0.731735	0.759322	0.665031	0.714459	0.704867	0.592545	0.632802	0.599249	0.749792	0.648633	0.72568	0.591095	0.760364	0.280032	0.361802	0.475423	0.290644	0.301849	0.29038	0.260526	0.389216	0.362742	0.403849	0.486801	0.25787	0.384104	0.341587	0.34797	0.360647	0.43372	0.362164	0.348927	0.317264	0.395304	0.388972	0.349918	0.451998	0.313036
94.638	0.729896	0.771964	0.737427	0.607614	0.648486	0.748948	0.677339	0.702239	0.757255	0.748294	0.642496	0.704352	0.771787	0.621531	0.70583	0.677206	0.637091	0.6258	0.602958	0.714877	0.657729	0.737879	0.59433	0.761652	0.281942	0.352777	0.480586	0.284537	0.304482	0.293509	0.248874	0.433771	0.38462	0.437509	0.500815	0.258462	0.412579	0.339493	0.349522	0.367406	0.40983	0.35007	0.352211	0.306093	0.385523	0.38647	0.355911	0.456694	0.309696
95.639	0.671278	0.737873	0.679402	0.588977	0.646551	0.735457	0.646806	0.693676	0.784632	0.71982	0.66437	0.700905	0.782723	0.618335	0.716245	0.674869	0.606565	0.612082	0.573463	0.708046	0.631145	0.706835	0.57827	0.721933	0.273998	0.357491	0.476412	0.282972	0.307959	0.301526	0.245232	0.400663	0.371234	0.417359	0.507681	0.24234	0.386168	0.347921	0.362007	0.333553	0.436547	0.371899	0.354592	0.314207	0.393338	0.403578	0.353854	0.475066	0.312393
96.638	0.741641	0.778277	0.717405	0.616964	0.67006	0.734148	0.654289	0.723629	0.764366	0.720416	0.663342	0.699824	0.766459	0.632867	0.698471	0.668033	0.63499	0.622165	0.577848	0.736958	0.634705	0.705488	0.602998	0.750033	0.266666	0.365775	0.467475	0.278231	0.297096	0.298487	0.253793	0.411239	0.358167	0.409056	0.506437	0.222089	0.414872	0.351203	0.358203	0.36088	0.408802	0.370403	0.359775	0.318319	0.388639	0.399518	0.360592	0.475152	0.316414
97.638	0.733205	0.769102	0.689714	0.617338	0.686596	0.732501	0.66294	0.713144	0.742691	0.731666	0.678895	0.695317	0.79393	0.612133	0.72328	0.693586	0.62375	0.619462	0.587369	0.709879	0.63349	0.709888	0.582728	0.753351	0.282367	0.368744	0.47732	0.279914	0.318606	0.29468	0.248866	0.390213	0.372371	0.420758	0.499478	0.253507	0.40479	0.337678	0.345112	0.350979	0.404888	0.362096	0.355588	0.321267	0.395206	0.384262	0.362342	0.472995	0.321762
98.639	0.696484	0.743155	0.699216	0.614641	0.660739	0.719069	0.660499	0.719815	0.785617	0.697222	0.660427	0.726993	0.752176	0.651414	0.733481	0.687801	0.630997	0.627877	0.588079	0.730502	0.64491	0.726095	0.595793	0.785255	0.281872	0.365698	0.470048	0.284358	0.33208	0.295436	0.259042	0.431645	0.378064	0.42714	0.51959	0.261424	0.410441	0.355692	0.371982	0.362473	0.405091	0.364402	0.353862	0.322271	0.401438	0.398228	0.364093	0.473759	0.325985
99.638	0.712336	0.79161	0.682702	0.622038	0.65543	0.743048	0.690948	0.729785	0.798852	0.760426	0.647608	0.727284	0.783641	0.636975	0.719908	0.703236	0.619571	0.632488	0.613797	0.740556	0.619186	0.727411	0.622933	0.765082	0.271001	0.356094	0.482645	0.286303	0.286746	0.291076	0.248012	0.412364	0.371738	0.402724	0.505061	0.227795	0.410098	0.358048	0.357953	0.333312	0.398215	0.360823	0.353267	0.309784	0.39851	0.39203	0.357074	0.462648	0.31371
100.639	0.723036	0.772208	0.691887	0.60623	0.644176	0.711164	0.66525	0.681867	0.806378	0.710578	0.663253	0.725122	0.805559	0.637782	0.736289	0.695372	0.573752	0.629387	0.584375	0.69412	0.619213	0.701562	0.606423	0.730917	0.277199	0.375633	0.483421	0.286982	0.316742	0.298685	0.237777	0.421916	0.362816	0.405204	0.495687	0.256146	0.397799	0.34191	0.361713	0.346859	0.416449	0.361678	0.354933	0.323152	0.391599	0.373916	0.367211	0.463834	0.322652
101.639	0.697396	0.773676	0.709276	0.59283	0.635201	0.737862	0.675244	0.705019	0.77231	0.710905	0.681144	0.764179	0.768961	0.655076	0.720619	0.689472	0.607262	0.613521	0.592107	0.719562	0.613546	0.69723	0.607967	0.75183	0.282403	0.381391	0.482884	0.283968	0.308575	0.305366	0.24105	0.435156	0.357755	0.397972	0.488734	0.240575	0.385102	0.347566	0.33602	0.343392	0.411487	0.357337	0.342933	0.313593	0.403149	0.400523	0.36182	0.464823	0.320534
102.638	0.673728	0.748751	0.693314	0.593657	0.64305	0.738615	0.681153	0.693773	0.78465	0.744557	0.667601	0.744516	0.796649	0.658029	0.73294	0.682806	0.608524	0.625829	0.587898	0.744721	0.639671	0.716924	0.612043	0.751745	0.2779	0.370135	0.473934	0.285322	0.289449	0.295608	0.247709	0.41605	0.366554	0.418586	0.509267	0.224221	0.443457	0.34784	0.364156	0.350053	0.405933	0.352312	0.342296	0.319573	0.393143	0.386338	0.387196	0.457949	0.313189
103.639	0.699761	0.734984	0.698938	0.613085	0.650496	0.717083	0.670518	0.697909	0.770306	0.712183	0.653394	0.716572	0.763487	0.639632	0.713714	0.670407	0.603091	0.606378	0.582836	0.753914	0.637415	0.727492	0.601532	0.775624	0.280105	0.356944	0.482357	0.282465	0.283834	0.300232	0.245396	0.400369	0.362023	0.419166	0.5107	0.258729	0.423723	0.350957	0.34449	0.336041	0.410121	0.36437	0.351485	0.32021	0.40174	0.380135	0.379141	0.466584	0.32058
104.638	0.702927	0.782455	0.713549	0.616089	0.673907	0.746733	0.705085	0.707816	0.800109	0.731755	0.654602	0.74234	0.801158	0.605709	0.724514	0.680754	0.581269	0.63736	0.595163	0.750366	0.604322	0.717653	0.595495	0.770715	0.267432	0.388003	0.47073	0.284573	0.294712	0.312088	0.246591	0.403066	0.380528	0.428121	0.514482	0.245305	0.400145	0.351477	0.343699	0.34141	0.410045	0.360613	0.352994	0.323742	0.41886	0.395185	0.374287	0.464178	0.315416
105.638	0.713625	0.757833	0.71034	0.597993	0.657086	0.722507	0.68963	0.691911	0.769156	0.700113	0.646533	0.723241	0.740944	0.64234	0.700142	0.674483	0.602937	0.628159	0.598971	0.735658	0.629652	0.743869	0.609552	0.781407	0.273753	0.379141	0.472803	0.28299	0.314346	0.305832	0.24948	0.400624	0.356034	0.42664	0.538021	0.24725	0.411522	0.356294	0.362204	0.359359	0.402769	0.372393	0.356045	0.31638	0.412918	0.400398	0.376975	0.464242	0.324211
106.639	0.676264	0.749455	0.698837	0.600563	0.633731	0.725349	0.682004	0.701441	0.77436	0.693834	0.661362	0.713995	0.767906	0.640631	0.708192	0.671475	0.602493	0.667101	0.605137	0.784876	0.67299	0.75591	0.616136	0.807644	0.284009	0.363979	0.470795	0.284539	0.305996	0.306314	0.250436	0.443308	0.361919	0.424078	0.519137	0.261702	0.402134	0.357463	0.350344	0.363313	0.416896	0.358666	0.354304	0.329046	0.408549	0.387902	0.370266	0.454246	0.330363
107.638	0.708577	0.759931	0.713364	0.605538	0.668386	0.732489	0.661986	0.721797	0.796551	0.684823	0.6868	0.75766	0.798571	0.640999	0.723531	0.690859	0.643309	0.629291	0.616376	0.752716	0.669453	0.745704	0.610199	0.783903	0.280247	0.38209	0.471576	0.275725	0.314203	0.312476	0.253678	0.409648	0.35539	0.411264	0.522097	0.247822	0.410789	0.35465	0.351816	0.348478	0.410177	0.36484	0.345371	0.316306	0.386007	0.382003	0.357496	0.460888	0.324533
108.639	0.674441	0.751955	0.700923	0.593982	0.645952	0.730186	0.648881	0.698845	0.795262	0.722911	0.660068	0.745053	0.801069	0.645214	0.722748	0.686463	0.595561	0.628734	0.610423	0.762735	0.657633	0.722867	0.626404	0.79215	0.274072	0.356888	0.475852	0.2856	0.291476	0.294802	0.242638	0.398687	0.353385	0.410501	0.495054	0.246348	0.401268	0.347783	0.352937	0.339849	0.404938	0.359413	0.34284	0.320155	0.404422	0.40371	0.392213	0.453028	0.323928
109.638	0.726323	0.765939	0.71305	0.635897	0.673062	0.739911	0.702895	0.712423	0.785501	0.744761	0.642063	0.722978	0.808458	0.657628	0.708106	0.680983	0.593696	0.616474	0.586669	0.730624	0.619318	0.716963	0.592947	0.750287	0.275282	0.371951	0.48437	0.285601	0.304625	0.303736	0.248989	0.413038	0.38743	0.447074	0.509766	0.275712	0.430937	0.349365	0.370735	0.368208	0.419241	0.360863	0.341909	0.320791	0.392473	0.380936	0.361652	0.44879	0.323272
110.639	0.713859	0.780969	0.722959	0.588514	0.668593	0.742804	0.686755	0.68697	0.796749	0.710221	0.665339	0.730802	0.808517	0.643989	0.726962	0.67644	0.625393	0.644336	0.595604	0.754082	0.6507	0.734677	0.613014	0.765826	0.277444	0.354865	0.477556	0.286225	0.288931	0.301413	0.237894	0.40176	0.367699	0.412025	0.508476	0.258591	0.431412	0.366679	0.363841	0.358931	0.420393	0.362302	0.35211	0.30587	0.383581	0.407846	0.387383	0.44746	0.322466
111.639	0.716479	0.797868	0.726338	0.604243	0.691972	0.740895	0.670386	0.716483	0.796509	0.727589	0.667596	0.736607	0.809841	0.639755	0.730146	0.70208	0.624233	0.62169	0.576293	0.749052	0.655559	0.709894	0.606493	0.764795	0.262294	0.357993	0.473765	0.27703	0.296036	0.309199	0.250346	0.395993	0.361958	0.432554	0.501614	0.237899	0.434744	0.341797	0.334375	0.367372	0.419183	0.366156	0.368534	0.319311	0.396537	0.414838	0.372779	0.466683	0.330013
112.638	0.730581	0.776676	0.698089	0.610617	0.658657	0.746547	0.664129	0.71574	0.791172	0.73917	0.661748	0.713224	0.77268	0.654143	0.717593	0.675925	0.634523	0.606618	0.566622	0.717471	0.618141	0.685745	0.594656	0.746342	0.27114	0.378952	0.464145	0.283036	0.316304	0.296699	0.246335	0.408085	0.356055	0.443392	0.524912	0.237558	0.426778	0.354893	0.352105	0.336833	0.417888	0.366738	0.353918	0.321859	0.387314	0.399916	0.370083	0.45503	0.326803
113.639	0.715104	0.762989	0.719472	0.623716	0.681281	0.752457	0.661377	0.716062	0.800808	0.734648	0.658747	0.747587	0.782974	0.667663	0.730897	0.681312	0.610682	0.61122	0.578341	0.729645	0.647347	0.70459	0.594542	0.75573	0.273118	0.392965	0.479884	0.279844	0.302185	0.311707	0.261509	0.389287	0.376657	0.449423	0.500481	0.224759	0.411811	0.33926	0.366226	0.341196	0.403817	0.365054	0.338123	0.314174	0.384959	0.395562	0.374948	0.443737	0.317044
114.638	0.731543	0.764708	0.693818	0.60588	0.671606	0.741937	0.675587	0.728896	0.778641	0.701956	0.653526	0.740081	0.753327	0.655385	0.710256	0.665862	0.632781	0.621792	0.594091	0.724533	0.651602	0.718702	0.615631	0.751218	0.261999	0.350974	0.478707	0.278314	0.296301	0.294721	0.253351	0.406289	0.37233	0.41885	0.513194	0.241778	0.436928	0.372439	0.354235	0.348558	0.40744	0.353021	0.345735	0.315185	0.379322	0.399662	0.365124	0.446285	0.317548
115.638	0.73519	0.797871	0.710276	0.622345	0.671957	0.755801	0.717237	0.719683	0.796602	0.745011	0.658468	0.746853	0.787372	0.626604	0.725914	0.68214	0.611003	0.649185	0.600625	0.741192	0.667821	0.717738	0.605967	0.751154	0.266709	0.370902	0.488604	0.278467	0.294134	0.283651	0.261471	0.385683	0.391695	0.469697	0.529225	0.26445	0.42788	0.377679	0.357959	0.357287	0.408474	0.370461	0.350353	0.324604	0.389635	0.402116	0.368085	0.452815	0.327763
116.639	0.685308	0.750034	0.701934	0.601789	0.669587	0.738111	0.663965	0.705215	0.807761	0.703014	0.683919	0.742419	0.778328	0.649502	0.71561	0.675765	0.628078	0.634924	0.601309	0.741872	0.649228	0.718683	0.626316	0.768243	0.261919	0.349974	0.477798	0.272319	0.321561	0.30598	0.248675	0.384866	0.383577	0.436449	0.497577	0.251784	0.40784	0.370501	0.348551	0.357636	0.404265	0.35971	0.35071	0.318844	0.383541	0.390378	0.377477	0.461977	0.327579
117.638	0.727578	0.787049	0.682689	0.587584	0.662435	0.746373	0.678403	0.714636	0.810716	0.707275	0.660339	0.730939	0.808174	0.616066	0.725526	0.678274	0.634493	0.643897	0.607805	0.75319	0.634842	0.728371	0.62189	0.78062	0.269251	0.3614	0.475783	0.281753	0.266725	0.304193	0.256107	0.380033	0.367586	0.418018	0.49429	0.234988	0.408503	0.344671	0.363778	0.351315	0.402764	0.358011	0.344622	0.30565	0.379202	0.408569	0.37964	0.450396	0.321553
118.639	0.691823	0.783503	0.710329	0.575255	0.650195	0.754971	0.666544	0.721387	0.790352	0.733771	0.664281	0.748338	0.78367	0.637136	0.725253	0.697315	0.624312	0.641277	0.599504	0.75798	0.640307	0.725327	0.614789	0.760654	0.26594	0.370089	0.482395	0.279318	0.316796	0.295586	0.26401	0.400118	0.366059	0.425415	0.521899	0.230586	0.415556	0.357088	0.366547	0.340177	0.410072	0.350014	0.345248	0.311208	0.382012	0.379519	0.365782	0.455251	0.329148
119.638	0.719365	0.790046	0.705747	0.624859	0.654458	0.752546	0.68176	0.720723	0.780609	0.737685	0.654434	0.711513	0.78213	0.637381	0.739165	0.675018	0.656195	0.671096	0.613871	0.802715	0.673147	0.743459	0.631582	0.796245	0.271106	0.36483	0.476046	0.2773	0.350862	0.29469	0.270007	0.434018	0.376273	0.426402	0.539543	0.241377	0.43258	0.345674	0.349461	0.346617	0.422179	0.357788	0.345298	0.319622	0.391078	0.413642	0.378902	0.457525	0.325779
120.638	0.711833	0.763587	0.73583	0.615656	0.650578	0.715986	0.661777	0.70682	0.797523	0.720934	0.666325	0.739467	0.79062	0.637609	0.721221	0.670973	0.660324	0.651599	0.599102	0.779424	0.680485	0.750453	0.633691	0.772548	0.278468	0.371383	0.497833	0.281659	0.347719	0.30527	0.260885	0.415504	0.367643	0.4575	0.529143	0.224156	0.440753	0.360084	0.36957	0.342987	0.423302	0.354159	0.344728	0.325321	0.389842	0.388839	0.356507	0.450242	0.320613
121.639	0.695688	0.803309	0.7393	0.610574	0.687375	0.748896	0.660012	0.708818	0.801904	0.715792	0.678171	0.751113	0.802216	0.654195	0.745559	0.6839	0.610341	0.645171	0.609264	0.791534	0.666974	0.740151	0.628215	0.7763	0.266557	0.368784	0.485658	0.28301	0.366809	0.320392	0.256737	0.412861	0.365452	0.435178	0.535604	0.243781	0.428265	0.371031	0.337039	0.346832	0.3869	0.347814	0.340818	0.313849	0.371729	0.386288	0.357134	0.448448	0.313113
122.638	0.694504	0.784124	0.724822	0.589565	0.688285	0.738657	0.694124	0.721194	0.809218	0.721952	0.684371	0.770459	0.797558	0.666881	0.755476	0.698651	0.604418	0.622697	0.579989	0.761036	0.639297	0.725899	0.620772	0.739398	0.265553	0.367158	0.480497	0.277206	0.301067	0.311089	0.248869	0.403529	0.382142	0.420912	0.522757	0.218751	0.440249	0.339012	0.341566	0.337898	0.417914	0.351553	0.350084	0.309703	0.375002	0.388801	0.379183	0.451438	0.322341
123.639	0.705277	0.748643	0.717149	0.607126	0.684001	0.749554	0.666268	0.703128	0.798915	0.736985	0.68671	0.752529	0.803051	0.669027	0.772948	0.703845	0.590884	0.630336	0.588496	0.761917	0.643202	0.730482	0.609757	0.762763	0.26973	0.374842	0.485899	0.281069	0.310123	0.303245	0.259493	0.423998	0.374099	0.439928	0.521261	0.249401	0.454149	0.366087	0.388292	0.365284	0.413733	0.343609	0.338327	0.319497	0.369997	0.399096	0.368309	0.453344	0.320883
124.638	0.697658	0.751163	0.716234	0.623067	0.670395	0.725234	0.66286	0.712118	0.79632	0.719786	0.680699	0.739698	0.809641	0.659244	0.741626	0.685592	0.627856	0.629609	0.591427	0.732064	0.663686	0.716883	0.601797	0.743284	0.267419	0.361773	0.486164	0.275294	0.314891	0.304602	0.244929	0.383171	0.37397	0.415786	0.507102	0.248655	0.412708	0.363562	0.3829	0.34944	0.409084	0.343965	0.356307	0.313597	0.384191	0.414207	0.377281	0.455598	0.328485
125.638	0.708816	0.763259	0.703582	0.623629	0.663488	0.734409	0.678805	0.715038	0.800973	0.719734	0.673003	0.735139	0.777221	0.685464	0.74895	0.684602	0.613425	0.623784	0.597623	0.742489	0.633169	0.708147	0.611182	0.747891	0.26081	0.35999	0.499491	0.286151	0.312127	0.312106	0.246052	0.425906	0.358881	0.406592	0.50297	0.228572	0.41746	0.3644	0.337082	0.305873	0.413052	0.3607	0.341716	0.326358	0.383976	0.417208	0.384516	0.464805	0.313027
126.639	0.713432	0.828005	0.707454	0.613891	0.702486	0.756269	0.697418	0.72825	0.80698	0.719176	0.674079	0.751372	0.798529	0.64351	0.724192	0.705561	0.651295	0.632141	0.604547	0.739935	0.661076	0.715382	0.613759	0.752646	0.259725	0.364861	0.50585	0.286894	0.301182	0.310304	0.26565	0.435417	0.375049	0.418118	0.53106	0.220276	0.444111	0.358368	0.350389	0.342471	0.413291	0.352946	0.340333	0.315382	0.365327	0.394519	0.37219	0.44918	0.329294
127.638	0.73145	0.783886	0.709134	0.608682	0.672125	0.780918	0.704689	0.745495	0.789338	0.724292	0.661046	0.75791	0.805798	0.633489	0.740661	0.692936	0.659324	0.639513	0.614047	0.766897	0.667449	0.735294	0.626409	0.755709	0.264912	0.381316	0.481449	0.286234	0.318278	0.311413	0.251987	0.416777	0.360951	0.411947	0.523624	0.243785	0.443274	0.360649	0.36502	0.341456	0.396219	0.35385	0.347063	0.302324	0.376626	0.4065	0.378683	0.458609	0.321208
128.639	0.71986	0.754599	0.698783	0.60166	0.652119	0.756003	0.681318	0.702493	0.803213	0.736604	0.694106	0.715023	0.788787	0.638177	0.746452	0.677509	0.669474	0.654962	0.607096	0.779314	0.673404	0.744842	0.620258	0.778846	0.25601	0.374568	0.495614	0.281942	0.311897	0.3064	0.257868	0.415137	0.374983	0.43015	0.51988	0.240013	0.453948	0.338319	0.379782	0.355761	0.403363	0.350476	0.352361	0.328869	0.374406	0.418133	0.390712	0.457948	0.31975
129.638	0.718758	0.765	0.690128	0.603477	0.646685	0.767196	0.698345	0.716303	0.800629	0.745246	0.668328	0.742031	0.772495	0.656638	0.721826	0.695341	0.6529	0.627897	0.598916	0.777982	0.673238	0.718203	0.622932	0.745901	0.25345	0.388464	0.495681	0.282517	0.3356	0.300994	0.251404	0.406932	0.384161	0.417483	0.524276	0.216157	0.455053	0.363959	0.401596	0.308299	0.421412	0.355265	0.354913	0.314601	0.378872	0.414073	0.374213	0.454162	0.317097
130.638	0.72636	0.788055	0.718665	0.594896	0.694176	0.757672	0.681291	0.707228	0.816721	0.722819	0.654042	0.733776	0.794106	0.638854	0.746079	0.689184	0.622224	0.645062	0.59358	0.7462	0.671117	0.727107	0.629885	0.746644	0.26871	0.398933	0.490866	0.284065	0.352421	0.316117	0.263697	0.412958	0.380671	0.433286	0.531308	0.216863	0.448729	0.361433	0.383201	0.342968	0.400629	0.349474	0.334067	0.318107	0.368176	0.393834	0.361963	0.442348	0.315756
131.639	0.709919	0.821898	0.722458	0.607543	0.674278	0.73572	0.677485	0.698061	0.794094	0.710214	0.669294	0.729751	0.789018	0.642885	0.705086	0.66468	0.627995	0.630204	0.597482	0.762051	0.68352	0.734474	0.614628	0.757987	0.261853	0.378266	0.491622	0.287987	0.315928	0.325572	0.25104	0.443535	0.383126	0.406067	0.522573	0.218323	0.438162	0.368922	0.364574	0.342527	0.40532	0.351695	0.340256	0.314719	0.372288	0.405801	0.386284	0.451404	0.313567
132.638	0.725016	0.789192	0.698555	0.592441	0.674134	0.735987	0.697813	0.696877	0.818042	0.73786	0.702578	0.73074	0.779517	0.63087	0.735456	0.705152	0.635367	0.629609	0.608952	0.796388	0.659726	0.748628	0.634964	0.749982	0.261618	0.38911	0.500446	0.283788	0.33854	0.314476	0.257761	0.397381	0.373966	0.411136	0.497692	0.208577	0.409605	0.364858	0.346553	0.333987	0.395664	0.340686	0.348166	0.313084	0.375624	0.389774	0.358111	0.451615	0.306903
133.639	0.722626	0.755817	0.715885	0.612833	0.667765	0.752895	0.682573	0.666504	0.820485	0.741238	0.677728	0.7616	0.817707	0.631162	0.742695	0.687331	0.603747	0.631373	0.594614	0.763883	0.680542	0.726645	0.614041	0.762161	0.273549	0.378291	0.490688	0.285667	0.321862	0.320784	0.245016	0.393698	0.376288	0.395382	0.514684	0.268032	0.410424	0.362722	0.345789	0.311901	0.415477	0.343615	0.342517	0.302365	0.366928	0.397857	0.359756	0.449859	0.307635
134.639	0.71803	0.768238	0.71672	0.608905	0.654668	0.746488	0.649973	0.687378	0.828826	0.723806	0.640811	0.747038	0.815448	0.639203	0.760313	0.687063	0.618604	0.618459	0.585087	0.764013	0.64695	0.737703	0.613718	0.749726	0.281528	0.378517	0.48185	0.282652	0.327012	0.323091	0.273741	0.445109	0.37335	0.413699	0.51758	0.23604	0.452937	0.348563	0.349529	0.32204	0.418813	0.350779	0.350912	0.322703	0.397593	0.412053	0.386515	0.468018	0.311494
135.638	0.719436	0.789636	0.71754	0.592973	0.674679	0.737468	0.668201	0.701666	0.781693	0.730052	0.656296	0.719232	0.766916	0.623355	0.714498	0.662192	0.587763	0.623186	0.598316	0.74004	0.64286	0.753915	0.609475	0.742033	0.272931	0.379725	0.495962	0.292648	0.328927	0.314075	0.251037	0.405185	0.385972	0.419569	0.535617	0.218871	0.40685	0.36034	0.350623	0.336349	0.400651	0.346816	0.338094	0.304253	0.364868	0.401362	0.365192	0.451447	0.310121
136.639	0.737089	0.798159	0.7052	0.602235	0.67699	0.736894	0.68642	0.740947	0.767693	0.700956	0.66922	0.715363	0.758737	0.618753	0.708503	0.654973	0.64011	0.653442	0.61112	0.73632	0.649661	0.749939	0.622015	0.760728	0.262065	0.375489	0.485289	0.283525	0.32365	0.314403	0.250156	0.38719	0.368922	0.422199	0.51159	0.208708	0.430917	0.362125	0.367646	0.327553	0.400818	0.341247	0.338082	0.312803	0.36942	0.413414	0.380387	0.447454	0.29984
137.638	0.725428	0.797647	0.70678	0.595798	0.676405	0.747195	0.690457	0.719384	0.795107	0.730327	0.647872	0.748294	0.784865	0.599992	0.726205	0.660557	0.597309	0.637111	0.596987	0.738068	0.645103	0.706451	0.628236	0.721918	0.261681	0.34676	0.49286	0.287805	0.284311	0.318761	0.250555	0.419367	0.386213	0.411224	0.508495	0.226181	0.438338	0.349755	0.346073	0.320898	0.396245	0.343119	0.341574	0.318714	0.387925	0.410471	0.360402	0.461516	0.312033
138.639	0.71152	0.823923	0.675255	0.608639	0.667235	0.734261	0.688183	0.710399	0.789041	0.714975	0.644941	0.724699	0.756497	0.609829	0.707462	0.65928	0.626505	0.652532	0.597559	0.749175	0.637104	0.720371	0.625633	0.743249	0.27596	0.382857	0.503766	0.291132	0.284219	0.324876	0.257276	0.412319	0.387744	0.411997	0.514577	0.205465	0.471499	0.381069	0.378899	0.328582	0.389324	0.344945	0.340186	0.307063	0.360792	0.410382	0.395447	0.447633	0.312387
139.639	0.693311	0.773263	0.69387	0.594794	0.661349	0.73943	0.68003	0.718732	0.827019	0.73338	0.659616	0.732165	0.783267	0.664655	0.739187	0.668345	0.617605	0.639703	0.586986	0.749718	0.66878	0.735828	0.612058	0.763048	0.260254	0.353475	0.485555	0.288369	0.320132	0.309483	0.244286	0.400428	0.366377	0.411465	0.498724	0.219752	0.461831	0.366648	0.370608	0.314666	0.39987	0.338065	0.33978	0.314623	0.354178	0.409335	0.373485	0.44715	0.301604
140.638	0.721359	0.792226	0.715817	0.578547	0.656134	0.741039	0.681178	0.720015	0.822575	0.749813	0.659766	0.755186	0.797811	0.683154	0.737151	0.675589	0.643965	0.670426	0.606723	0.701867	0.668359	0.743634	0.619207	0.766984	0.270003	0.372077	0.489745	0.282047	0.325705	0.328027	0.259385	0.434741	0.381938	0.39271	0.501854	0.176803	0.426819	0.353388	0.367194	0.302736	0.400483	0.357085	0.341203	0.328856	0.386947	0.405983	0.381353	0.471462	0.320724
141.639	0.702496	0.783478	0.703002	0.592849	0.662355	0.720541	0.639592	0.729375	0.801309	0.716505	0.675943	0.724028	0.790801	0.615455	0.719434	0.677278	0.609598	0.628236	0.591717	0.73405	0.651242	0.717531	0.623658	0.736862	0.25366	0.378318	0.488395	0.301759	0.300378	0.323912	0.260765	0.410745	0.374947	0.401561	0.506147	0.22565	0.458005	0.365871	0.391631	0.327426	0.411445	0.34124	0.344257	0.312855	0.365079	0.394093	0.369515	0.452987	0.304537
142.638	0.703568	0.810399	0.718242	0.617071	0.677425	0.752646	0.675512	0.715411	0.796328	0.699253	0.682117	0.738366	0.785906	0.634623	0.709615	0.658839	0.618539	0.662554	0.599549	0.751996	0.67891	0.72446	0.615212	0.74675	0.268044	0.401153	0.495935	0.297872	0.33278	0.328767	0.254561	0.394907	0.388453	0.400471	0.495506	0.203863	0.455582	0.346973	0.378885	0.324611	0.402477	0.339171	0.346792	0.32682	0.378538	0.41569	0.372862	0.454702	0.310024
143.639	0.728434	0.793334	0.730876	0.582354	0.664659	0.741682	0.668716	0.687117	0.827491	0.723221	0.657298	0.71476	0.79951	0.64603	0.733183	0.702619	0.61088	0.62784	0.586313	0.732456	0.621639	0.70529	0.606983	0.740813	0.261798	0.369196	0.502995	0.293991	0.29357	0.308882	0.248689	0.409782	0.378362	0.422202	0.496605	0.229465	0.452777	0.345891	0.359506	0.321878	0.383432	0.349585	0.346576	0.312273	0.375239	0.402701	0.366335	0.453129	0.306766
144.639	0.715499	0.786478	0.729176	0.599054	0.644936	0.757214	0.694801	0.742839	0.821628	0.717025	0.655062	0.719712	0.800644	0.621518	0.73049	0.667268	0.5931	0.598939	0.576123	0.723934	0.617888	0.684967	0.611416	0.730421	0.26312	0.364893	0.489626	0.285716	0.293005	0.315659	0.245643	0.39091	0.366947	0.416212	0.530532	0.196827	0.419887	0.348867	0.341132	0.292703	0.403447	0.342389	0.348298	0.315842	0.378538	0.418858	0.377079	0.456694	0.311347
145.638	0.711317	0.80159	0.7298	0.605651	0.650972	0.738713	0.690922	0.738384	0.808356	0.727446	0.647294	0.729012	0.797565	0.625068	0.729075	0.684236	0.633616	0.63632	0.588979	0.759695	0.62569	0.722166	0.626572	0.722851	0.258369	0.380741	0.48303	0.291779	0.34538	0.316834	0.256136	0.39126	0.391596	0.443352	0.529454	0.226073	0.453442	0.347996	0.36017	0.329659	0.422182	0.355495	0.344291	0.313403	0.37968	0.423632	0.364076	0.473957	0.312539
146.639	0.735175	0.787366	0.723956	0.595826	0.655132	0.722622	0.680239	0.716288	0.79925	0.724893	0.661296	0.733217	0.817331	0.628398	0.729462	0.657177	0.655243	0.638747	0.595541	0.768382	0.651876	0.744425	0.631808	0.756736	0.269089	0.368892	0.497082	0.296236	0.317295	0.334412	0.257024	0.427	0.38772	0.431608	0.504699	0.239306	0.481061	0.360247	0.375749	0.331612	0.385996	0.339286	0.342225	0.322053	0.36878	0.412624	0.373538	0.451353	0.304698
147.638	0.717791	0.788357	0.725908	0.576428	0.659036	0.724482	0.68714	0.696617	0.800922	0.717323	0.665364	0.716311	0.766318	0.623942	0.730293	0.663025	0.646295	0.639677	0.615844	0.743926	0.674659	0.752449	0.627061	0.786451	0.26178	0.363793	0.491289	0.296808	0.303531	0.302402	0.251439	0.413935	0.392491	0.445197	0.534076	0.202005	0.445105	0.326376	0.365403	0.337278	0.395715	0.349937	0.339794	0.31018	0.374169	0.422108	0.383984	0.464799	0.314843
148.639	0.698488	0.789161	0.720116	0.585664	0.676113	0.723605	0.676207	0.723245	0.840793	0.726665	0.680716	0.729717	0.767849	0.642312	0.737872	0.678162	0.600618	0.617306	0.602161	0.753068	0.659308	0.744306	0.610951	0.756651	0.255398	0.375256	0.489379	0.307562	0.312849	0.321958	0.242522	0.418002	0.378099	0.431941	0.500631	0.220763	0.464916	0.330797	0.375263	0.304847	0.392494	0.349252	0.340672	0.332414	0.378011	0.424976	0.394736	0.473107	0.316094
149.639	0.716653	0.788738	0.712081	0.587144	0.643568	0.713597	0.6821	0.690825	0.796944	0.68602	0.662371	0.719006	0.780614	0.602039	0.713534	0.651194	0.630594	0.655009	0.596645	0.750685	0.650736	0.763814	0.625098	0.751779	0.271141	0.377635	0.499606	0.314097	0.35932	0.337304	0.256239	0.444968	0.362578	0.418715	0.484091	0.218229	0.433843	0.369046	0.3818	0.330172	0.40741	0.352778	0.344241	0.317844	0.373133	0.425119	0.385492	0.47188	0.309374
150.638	0.702384	0.81435	0.698309	0.59676	0.679314	0.725144	0.674769	0.711565	0.816125	0.727133	0.667084	0.701905	0.82342	0.598861	0.717802	0.662763	0.651492	0.64034	0.60523	0.741913	0.674722	0.751217	0.62617	0.761417	0.264053	0.379635	0.504331	0.303974	0.327333	0.326375	0.257878	0.429026	0.385389	0.398055	0.498316	0.201259	0.442318	0.349783	0.38799	0.33831	0.398998	0.354192	0.338438	0.314632	0.363793	0.429116	0.389857	0.461296	0.313115
151.639	0.694898	0.765867	0.69607	0.598335	0.657539	0.734732	0.666427	0.698693	0.814365	0.72818	0.671236	0.739599	0.78708	0.650543	0.721787	0.676828	0.617936	0.64768	0.61902	0.753424	0.649668	0.706962	0.631942	0.77225	0.271676	0.372934	0.49413	0.30624	0.322406	0.328845	0.252692	0.439555	0.374446	0.396015	0.490139	0.201864	0.462797	0.354125	0.364209	0.323496	0.39604	0.344433	0.349021	0.321322	0.363038	0.417501	0.386722	0.465188	0.319826
152.638	0.695661	0.787419	0.707286	0.621393	0.684859	0.770978	0.670835	0.718344	0.831669	0.725173	0.661402	0.716255	0.772402	0.638123	0.729505	0.667263	0.643418	0.640086	0.592763	0.748326	0.649946	0.717815	0.601121	0.749849	0.268386	0.358231	0.495596	0.313816	0.356287	0.33602	0.24352	0.43642	0.388749	0.40519	0.50144	0.226053	0.470846	0.336407	0.363157	0.346427	0.399028	0.356276	0.347229	0.318645	0.37607	0.400215	0.372298	0.455194	0.325142
153.639	0.710632	0.803947	0.732278	0.60388	0.671425	0.761906	0.710973	0.724702	0.845269	0.73141	0.663903	0.761945	0.813155	0.617681	0.742356	0.705249	0.659613	0.670362	0.612014	0.77881	0.697751	0.745348	0.655859	0.75575	0.26414	0.359582	0.495831	0.313201	0.318486	0.333306	0.2511	0.432076	0.356739	0.401533	0.474858	0.210605	0.469609	0.35792	0.379106	0.347653	0.392732	0.337661	0.350624	0.302952	0.368709	0.413244	0.375752	0.465496	0.30668
154.639	0.732773	0.804097	0.736026	0.599622	0.680305	0.744292	0.704186	0.686286	0.834908	0.718413	0.669108	0.746132	0.804779	0.652774	0.72898	0.695291	0.640482	0.638195	0.609567	0.732904	0.677275	0.736628	0.624701	0.756952	0.261621	0.347533	0.519934	0.317144	0.332663	0.325172	0.241214	0.4107	0.355988	0.405218	0.476931	0.18454	0.431453	0.342001	0.369547	0.325564	0.411447	0.361622	0.35145	0.310602	0.375674	0.432079	0.394886	0.457899	0.326935
155.638	0.706221	0.781878	0.718559	0.585606	0.684215	0.744237	0.668062	0.726553	0.820346	0.730538	0.677602	0.726078	0.819745	0.630105	0.733816	0.682291	0.654804	0.663792	0.596242	0.716768	0.660328	0.706825	0.613163	0.757411	0.282341	0.371002	0.515303	0.306795	0.3585	0.342141	0.252958	0.448406	0.381418	0.408203	0.509474	0.225215	0.464598	0.346045	0.353544	0.316379	0.406512	0.363358	0.348769	0.307509	0.374013	0.423754	0.352703	0.470978	0.318146
156.639	0.726734	0.769278	0.710818	0.612417	0.657205	0.751892	0.666052	0.701518	0.856225	0.739443	0.701513	0.787074	0.834174	0.645727	0.752494	0.698438	0.625506	0.629368	0.577692	0.720117	0.637556	0.723414	0.60608	0.743646	0.266542	0.383515	0.518108	0.319918	0.358114	0.330697	0.250476	0.45613	0.361153	0.415019	0.489588	0.201191	0.425262	0.340656	0.34849	0.322114	0.425383	0.375573	0.361708	0.327668	0.401945	0.447358	0.408405	0.461217	0.31936
157.638	0.707699	0.79863	0.702609	0.620467	0.684879	0.718367	0.686686	0.704845	0.828153	0.729673	0.671158	0.760609	0.789269	0.653707	0.7325	0.670142	0.56696	0.607339	0.561905	0.715255	0.640191	0.674057	0.591228	0.707863	0.279047	0.410341	0.525961	0.320392	0.346905	0.342176	0.249927	0.452505	0.366507	0.42174	0.49972	0.215535	0.441071	0.381379	0.37862	0.321502	0.398753	0.35088	0.349119	0.320312	0.364315	0.416611	0.390394	0.454759	0.315267
158.638	0.717138	0.781921	0.721929	0.605632	0.680288	0.788287	0.675758	0.728638	0.842872	0.763342	0.711079	0.783583	0.812269	0.631254	0.759583	0.681829	0.607591	0.649735	0.58539	0.711712	0.650674	0.709691	0.609255	0.744899	0.267614	0.376969	0.518105	0.31407	0.370957	0.32707	0.254576	0.421144	0.364549	0.415997	0.484246	0.21238	0.447764	0.363849	0.354955	0.327825	0.415435	0.349247	0.354349	0.313605	0.370626	0.416695	0.390562	0.455707	0.323097
159.639	0.719751	0.783618	0.706342	0.596685	0.656429	0.740914	0.693317	0.707501	0.856248	0.749519	0.683958	0.758084	0.804674	0.641426	0.754856	0.695015	0.610781	0.639043	0.596747	0.742596	0.647055	0.701439	0.647828	0.75266	0.26256	0.407395	0.524904	0.320588	0.35154	0.337289	0.243322	0.437236	0.373237	0.401697	0.481734	0.219509	0.428902	0.363374	0.336933	0.305904	0.393147	0.352422	0.342204	0.319392	0.363383	0.422025	0.376945	0.457392	0.302226
160.638	0.72341	0.791325	0.706743	0.607254	0.656242	0.763183	0.664887	0.716458	0.841268	0.779907	0.738016	0.776792	0.826043	0.681337	0.763554	0.710899	0.610256	0.6374	0.579911	0.711617	0.666618	0.71467	0.599721	0.720267	0.256925	0.375103	0.504701	0.314501	0.360857	0.333001	0.255958	0.444421	0.374047	0.405078	0.487455	0.181812	0.456934	0.357669	0.35448	0.335606	0.404392	0.363799	0.349244	0.335052	0.377142	0.431122	0.38542	0.463036	0.315203
161.639	0.692306	0.789732	0.717312	0.599121	0.680791	0.771425	0.68036	0.724764	0.819973	0.729948	0.704029	0.775418	0.820345	0.636436	0.750678	0.696152	0.672761	0.686058	0.600769	0.743513	0.674846	0.772326	0.644246	0.76591	0.248945	0.359613	0.516437	0.312857	0.317021	0.335382	0.234206	0.433312	0.354906	0.400666	0.490947	0.199417	0.438934	0.348276	0.357532	0.330095	0.421269	0.372066	0.358737	0.317284	0.369594	0.433434	0.371884	0.460933	0.310868
162.638	0.675236	0.811346	0.720279	0.596179	0.68473	0.743266	0.679785	0.709984	0.811493	0.713568	0.703626	0.723964	0.795607	0.618293	0.740934	0.690631	0.652247	0.665635	0.587638	0.711553	0.634504	0.738912	0.632943	0.757306	0.27441	0.370837	0.514919	0.313541	0.328823	0.328971	0.257791	0.40711	0.367567	0.401231	0.502439	0.227802	0.433554	0.346242	0.352755	0.309991	0.385427	0.344404	0.335162	0.304221	0.355205	0.421796	0.368832	0.449652	0.306767
163.638	0.687848	0.789489	0.696426	0.604256	0.645518	0.752411	0.673806	0.721201	0.829837	0.731007	0.670931	0.748757	0.771195	0.616431	0.746236	0.6817	0.621548	0.611878	0.571855	0.707654	0.629065	0.686598	0.621582	0.716104	0.25936	0.361954	0.539409	0.314138	0.313313	0.338345	0.2564	0.436927	0.36347	0.400275	0.481605	0.196418	0.430395	0.355949	0.367457	0.307667	0.396328	0.354395	0.346455	0.330001	0.375585	0.434432	0.378374	0.454517	0.314087
164.639	0.683201	0.812537	0.728839	0.598284	0.668197	0.7437	0.676549	0.699792	0.82638	0.723636	0.668298	0.766842	0.772401	0.620022	0.742449	0.683808	0.628308	0.678873	0.573986	0.732106	0.639564	0.735426	0.6243	0.726344	0.256389	0.412344	0.528922	0.311894	0.354901	0.333642	0.260607	0.448681	0.375711	0.42143	0.507011	0.213915	0.436452	0.375366	0.38121	0.329166	0.396702	0.365105	0.350222	0.324556	0.374613	0.432367	0.418575	0.456103	0.32319
165.638	0.669889	0.804357	0.686188	0.577827	0.677506	0.757134	0.663301	0.754227	0.805798	0.684306	0.638734	0.700556	0.764923	0.60949	0.731265	0.649378	0.635917	0.666298	0.568978	0.708566	0.655664	0.702496	0.607253	0.728053	0.261405	0.386485	0.520491	0.307974	0.35714	0.340727	0.256882	0.452783	0.376872	0.422647	0.500202	0.216651	0.454177	0.35367	0.387825	0.305472	0.394983	0.361045	0.341045	0.311048	0.365299	0.428243	0.380985	0.448468	0.324593
166.639	0.704294	0.816818	0.708757	0.589048	0.658885	0.753001	0.696468	0.718826	0.810639	0.700063	0.665134	0.713496	0.761495	0.596738	0.727757	0.657519	0.612646	0.633834	0.568535	0.717694	0.622249	0.711528	0.621379	0.712998	0.256769	0.376584	0.517742	0.313635	0.336793	0.330804	0.25221	0.423896	0.376321	0.423818	0.495225	0.219944	0.448221	0.385541	0.374679	0.325439	0.398699	0.360833	0.341885	0.305792	0.373846	0.432705	0.371927	0.461379	0.323034
167.639	0.720004	0.80277	0.722715	0.620909	0.673084	0.741011	0.66788	0.724482	0.859642	0.736395	0.711376	0.762193	0.792259	0.635342	0.742036	0.688756	0.639208	0.66649	0.579526	0.724838	0.649919	0.718301	0.649409	0.732794	0.271369	0.389266	0.52445	0.305731	0.36406	0.34524	0.256623	0.447132	0.373766	0.41104	0.495559	0.225413	0.477492	0.369742	0.388192	0.338321	0.400045	0.359527	0.354619	0.320696	0.377989	0.434632	0.397809	0.457429	0.321689
168.638	0.692561	0.810746	0.726897	0.589809	0.682309	0.749128	0.685063	0.746341	0.822741	0.703371	0.640288	0.721036	0.755658	0.618991	0.722965	0.663612	0.6754	0.663343	0.575729	0.699064	0.64773	0.727568	0.625599	0.718253	0.243412	0.362961	0.512916	0.302417	0.321104	0.335894	0.249189	0.430333	0.372508	0.410806	0.505547	0.242952	0.447742	0.364485	0.391372	0.312719	0.411873	0.347364	0.347532	0.314383	0.365682	0.44416	0.381821	0.457536	0.336199
169.639	0.699346	0.81984	0.725436	0.611296	0.667758	0.768648	0.703431	0.711849	0.812558	0.747525	0.694818	0.758164	0.807833	0.635007	0.749885	0.686326	0.632947	0.651116	0.565423	0.689126	0.650285	0.700976	0.614058	0.739233	0.261833	0.384354	0.524123	0.312182	0.36077	0.336144	0.251025	0.426053	0.372437	0.416055	0.501819	0.207601	0.460157	0.37128	0.378109	0.310006	0.40859	0.362314	0.341142	0.323408	0.365224	0.432491	0.384852	0.451259	0.331717
170.638	0.682911	0.809184	0.718626	0.576282	0.674933	0.753011	0.682769	0.730891	0.80713	0.732251	0.665842	0.726903	0.796125	0.601072	0.739866	0.662361	0.619903	0.624716	0.570812	0.719558	0.634718	0.697967	0.629369	0.703755	0.253304	0.387735	0.530138	0.301625	0.349198	0.328675	0.259607	0.44946	0.374995	0.419901	0.480154	0.210832	0.429138	0.36574	0.365536	0.320779	0.401023	0.363881	0.339553	0.319028	0.368732	0.436392	0.400279	0.451394	0.324966
171.639	0.693279	0.793574	0.723122	0.595066	0.651825	0.74606	0.635277	0.735815	0.824733	0.753182	0.668049	0.762865	0.801124	0.611428	0.75919	0.666686	0.62158	0.651228	0.567968	0.702805	0.625238	0.712191	0.628413	0.712653	0.252612	0.391179	0.551235	0.314651	0.368601	0.33026	0.257735	0.477371	0.363849	0.419757	0.486396	0.238491	0.470742	0.374546	0.403689	0.33893	0.402109	0.366594	0.353307	0.319351	0.368738	0.433947	0.397935	0.454593	0.322352
172.639	0.686919	0.792834	0.709462	0.585993	0.650214	0.765541	0.649815	0.724186	0.846375	0.732057	0.687192	0.752261	0.799675	0.623221	0.757369	0.677669	0.634697	0.645496	0.582324	0.7289	0.654556	0.731021	0.648981	0.736565	0.261586	0.38007	0.533017	0.302492	0.368146	0.33391	0.259612	0.444803	0.378989	0.41075	0.48242	0.20633	0.476022	0.35286	0.360562	0.304244	0.392643	0.371735	0.348164	0.318825	0.379367	0.451969	0.403015	0.446476	0.319681
173.638	0.695335	0.794264	0.72197	0.624229	0.689114	0.779258	0.671777	0.724849	0.812352	0.754087	0.678217	0.744034	0.794864	0.594522	0.729603	0.658335	0.63509	0.649266	0.576903	0.713821	0.680532	0.730499	0.643511	0.748609	0.280344	0.374393	0.526055	0.30393	0.331032	0.324891	0.250024	0.456725	0.37574	0.403173	0.472472	0.23335	0.453285	0.355564	0.380362	0.301341	0.412222	0.364749	0.356338	0.316748	0.373816	0.436175	0.413851	0.451125	0.317224
174.639	0.704071	0.802924	0.733836	0.611813	0.644033	0.779006	0.65797	0.760016	0.810214	0.719046	0.67458	0.761411	0.73426	0.601643	0.728288	0.656964	0.6258	0.664763	0.585137	0.710866	0.655052	0.729742	0.621423	0.744716	0.272752	0.386691	0.530094	0.310803	0.339832	0.331511	0.25498	0.489903	0.37106	0.414931	0.468432	0.221455	0.49428	0.365055	0.388036	0.290973	0.388715	0.366606	0.356783	0.328651	0.384182	0.446509	0.416859	0.465563	0.326841
175.638	0.717836	0.821596	0.704403	0.601252	0.669018	0.790582	0.664198	0.766189	0.827014	0.72553	0.66214	0.778999	0.811227	0.628061	0.750234	0.688574	0.578444	0.638125	0.572335	0.679258	0.648765	0.715905	0.637038	0.727123	0.248203	0.369591	0.514108	0.303453	0.357766	0.31902	0.247732	0.449813	0.373061	0.423374	0.465762	0.26051	0.447054	0.377458	0.348719	0.312026	0.395784	0.363315	0.344409	0.319857	0.364343	0.425563	0.393812	0.446328	0.32333
176.639	0.684651	0.784926	0.725025	0.597879	0.679675	0.759619	0.665577	0.752437	0.806261	0.742575	0.69149	0.766139	0.790189	0.615067	0.761245	0.67679	0.60773	0.629636	0.55985	0.715753	0.655318	0.723044	0.610163	0.741098	0.257331	0.382815	0.537504	0.31339	0.330074	0.33484	0.256349	0.447791	0.361557	0.399975	0.478406	0.224319	0.487236	0.333728	0.372919	0.314246	0.40981	0.365355	0.359423	0.333534	0.373062	0.433536	0.392666	0.454549	0.326341
177.639	0.66966	0.781084	0.715742	0.594498	0.67504	0.766289	0.663401	0.720239	0.824805	0.728643	0.711844	0.745942	0.805354	0.624894	0.757932	0.6854	0.614614	0.622547	0.547366	0.661771	0.632387	0.705959	0.599836	0.732039	0.254565	0.378768	0.535752	0.308459	0.334376	0.331731	0.253843	0.460254	0.379985	0.398865	0.501989	0.232549	0.475679	0.379303	0.390948	0.346305	0.396826	0.364334	0.334947	0.309846	0.364391	0.425159	0.398255	0.446978	0.321718
178.638	0.675947	0.791142	0.732385	0.618197	0.679945	0.7543	0.649609	0.724426	0.820702	0.721756	0.688189	0.761926	0.78722	0.628542	0.747107	0.674451	0.598113	0.605251	0.550492	0.680652	0.632779	0.69805	0.62211	0.755165	0.264814	0.417041	0.538421	0.315045	0.38991	0.34743	0.261272	0.48586	0.391099	0.432341	0.512926	0.218432	0.478442	0.382871	0.392519	0.323327	0.403357	0.357646	0.34897	0.312376	0.369535	0.436106	0.378021	0.461191	0.33092
179.639	0.721391	0.803246	0.750573	0.608136	0.682782	0.757728	0.672934	0.7275	0.80589	0.74588	0.676687	0.736543	0.79089	0.6115	0.739767	0.660977	0.628208	0.623626	0.550364	0.695463	0.640939	0.739459	0.63071	0.735447	0.25927	0.38421	0.545763	0.314614	0.346686	0.328128	0.257206	0.462726	0.372679	0.429695	0.477844	0.22909	0.490426	0.37351	0.401719	0.347386	0.38064	0.350899	0.342148	0.302577	0.346251	0.427531	0.3836	0.453295	0.325903
180.638	0.682956	0.774268	0.721769	0.610007	0.690458	0.7808	0.654083	0.767392	0.825984	0.68799	0.678828	0.730017	0.777573	0.602043	0.739689	0.673228	0.633069	0.624942	0.565434	0.687203	0.634045	0.713884	0.605457	0.744012	0.252186	0.387888	0.542189	0.308637	0.357389	0.332811	0.260605	0.47092	0.370687	0.420894	0.475723	0.198336	0.494894	0.361153	0.38167	0.300046	0.393826	0.362826	0.3423	0.310336	0.379741	0.441075	0.407149	0.459397	0.321712
181.639	0.689653	0.788194	0.721321	0.58382	0.709916	0.806393	0.676093	0.749516	0.803051	0.750229	0.67249	0.73955	0.794851	0.646896	0.735998	0.676819	0.617861	0.637508	0.566414	0.682974	0.648491	0.729671	0.619424	0.752218	0.257261	0.393344	0.538651	0.311846	0.315205	0.338135	0.25512	0.445154	0.381303	0.417812	0.473151	0.23284	0.491947	0.374547	0.413274	0.326808	0.38715	0.358323	0.34304	0.315959	0.364597	0.432807	0.404443	0.466726	0.327699
182.639	0.666303	0.772654	0.71131	0.589714	0.674648	0.735874	0.649854	0.706124	0.845496	0.753831	0.724904	0.754549	0.815593	0.657561	0.762459	0.7048	0.63278	0.644517	0.567367	0.710978	0.659116	0.710258	0.621709	0.724124	0.252976	0.410702	0.545272	0.3175	0.351005	0.319565	0.264307	0.470646	0.357176	0.403446	0.4729	0.193057	0.47481	0.367542	0.389683	0.338138	0.382938	0.361561	0.342863	0.313759	0.374433	0.432666	0.415573	0.472271	0.319962
183.638	0.695852	0.748976	0.701468	0.62722	0.680748	0.757138	0.690628	0.715478	0.828959	0.715676	0.696292	0.717093	0.791757	0.637844	0.728768	0.677456	0.622437	0.622015	0.567066	0.723574	0.646717	0.715539	0.616448	0.726565	0.2701	0.408917	0.560729	0.314855	0.346945	0.326207	0.267949	0.475632	0.385804	0.407923	0.467199	0.216178	0.443574	0.359101	0.370658	0.306723	0.385001	0.354224	0.344696	0.322946	0.369479	0.418591	0.389037	0.463597	0.317394
184.639	0.661168	0.770096	0.702115	0.6232	0.646835	0.747873	0.674617	0.709036	0.856149	0.715895	0.688844	0.77063	0.782002	0.639001	0.751238	0.672434	0.619495	0.620135	0.563713	0.699922	0.64394	0.712442	0.628674	0.724479	0.255561	0.391124	0.549798	0.308884	0.3501	0.332544	0.255004	0.470104	0.382724	0.417805	0.487582	0.214045	0.489035	0.385948	0.374941	0.302921	0.386828	0.355688	0.338425	0.326017	0.374388	0.434398	0.387166	0.46419	0.314424
185.638	0.69441	0.80117	0.712699	0.622414	0.667617	0.774375	0.663161	0.74261	0.81461	0.699522	0.695178	0.738098	0.768036	0.600915	0.730213	0.655359	0.663412	0.630155	0.57077	0.7056	0.670035	0.759997	0.629108	0.768331	0.245284	0.37674	0.556315	0.313685	0.317617	0.322709	0.254701	0.438034	0.379286	0.405541	0.497896	0.22695	0.49126	0.360091	0.389787	0.306547	0.38808	0.351521	0.340221	0.316705	0.366056	0.434928	0.410392	0.450124	0.317719
186.639	0.702895	0.781874	0.730595	0.584904	0.659472	0.755421	0.667009	0.716249	0.812452	0.727711	0.700078	0.761383	0.813463	0.630803	0.754818	0.664102	0.631532	0.65847	0.568292	0.709912	0.66874	0.719954	0.626219	0.754634	0.252673	0.380213	0.552307	0.310328	0.315916	0.321662	0.263999	0.446742	0.38325	0.405716	0.480596	0.212141	0.470826	0.365686	0.388484	0.29027	0.384572	0.357987	0.339187	0.302993	0.366688	0.435069	0.412309	0.462414	0.318481
187.639	0.737032	0.76304	0.721394	0.597706	0.68164	0.767147	0.661838	0.71614	0.819057	0.716873	0.704904	0.751049	0.78361	0.59876	0.750076	0.679797	0.623109	0.618459	0.539253	0.680129	0.634436	0.689439	0.604807	0.739602	0.262173	0.381552	0.547281	0.303281	0.358093	0.345276	0.262118	0.444249	0.37445	0.40965	0.469905	0.216424	0.484455	0.356805	0.385546	0.316569	0.397206	0.361992	0.340605	0.317655	0.38238	0.428137	0.394226	0.457506	0.326161
188.638	0.702286	0.782573	0.714338	0.611902	0.689207	0.774193	0.693945	0.729647	0.810196	0.724454	0.669759	0.747188	0.810059	0.63484	0.733033	0.65552	0.621861	0.637521	0.557402	0.734214	0.643069	0.729039	0.619547	0.760312	0.2468	0.389476	0.558792	0.310452	0.350521	0.333604	0.263311	0.469824	0.36815	0.428493	0.465272	0.233033	0.515021	0.360367	0.393504	0.311947	0.388201	0.364415	0.345053	0.317125	0.387119	0.453243	0.420519	0.459091	0.319435
189.639	0.701875	0.787297	0.698728	0.60807	0.68064	0.75629	0.661685	0.711836	0.805882	0.717026	0.652656	0.722862	0.772164	0.586098	0.722629	0.657586	0.647527	0.656947	0.560451	0.712627	0.651934	0.726467	0.63459	0.774962	0.257226	0.410025	0.565337	0.308943	0.369331	0.33806	0.254221	0.452616	0.387762	0.407403	0.472584	0.206672	0.477919	0.358107	0.375508	0.3222	0.398453	0.367787	0.34634	0.317013	0.375467	0.433511	0.42062	0.466974	0.322716
190.638	0.710319	0.770784	0.703587	0.634644	0.652551	0.763781	0.659899	0.708757	0.801794	0.722041	0.690577	0.737527	0.808669	0.634072	0.730532	0.6666	0.651105	0.644837	0.559086	0.709973	0.660864	0.733834	0.615985	0.777665	0.249928	0.39047	0.575492	0.310909	0.365518	0.331258	0.263876	0.467011	0.368117	0.410314	0.491675	0.224787	0.481379	0.346794	0.385332	0.306082	0.37107	0.363551	0.349473	0.309022	0.374295	0.427663	0.399163	0.449306	0.323192
191.639	0.707088	0.786805	0.676647	0.599724	0.646385	0.771209	0.681454	0.718437	0.81723	0.741254	0.693504	0.737225	0.805895	0.624204	0.761998	0.672865	0.647632	0.661138	0.559983	0.704364	0.668166	0.734282	0.62572	0.779001	0.247874	0.374629	0.563972	0.311512	0.330231	0.335073	0.262544	0.436609	0.369956	0.404409	0.451957	0.224055	0.4757	0.356418	0.405087	0.306561	0.398956	0.360569	0.34589	0.317036	0.370796	0.419074	0.422368	0.448263	0.324292
192.639	0.675608	0.80689	0.725828	0.591632	0.642326	0.745555	0.64417	0.698405	0.822111	0.734828	0.702189	0.771379	0.784933	0.634616	0.750094	0.696658	0.644949	0.638139	0.564451	0.741293	0.665539	0.712462	0.623998	0.753895	0.254363	0.395628	0.555957	0.302714	0.357032	0.328334	0.248267	0.465979	0.368642	0.398094	0.459012	0.196477	0.493645	0.343244	0.353355	0.308263	0.3799	0.364715	0.345082	0.307273	0.371126	0.42966	0.393337	0.444175	0.326353
193.638	0.697631	0.831605	0.725207	0.616468	0.669694	0.764651	0.681895	0.73546	0.831596	0.740667	0.689222	0.730892	0.784701	0.607872	0.769416	0.675376	0.65666	0.674882	0.560801	0.727374	0.697017	0.736025	0.633259	0.772318	0.251968	0.384518	0.564786	0.297061	0.350241	0.325325	0.267807	0.472293	0.366897	0.418074	0.480895	0.202732	0.449995	0.367616	0.38821	0.305509	0.384536	0.369005	0.352824	0.305982	0.3772	0.45055	0.397932	0.461675	0.331627
194.639	0.716831	0.793365	0.709649	0.595553	0.674036	0.766364	0.692335	0.742263	0.790664	0.72041	0.671716	0.762996	0.772963	0.585048	0.731101	0.66878	0.642104	0.62383	0.536506	0.726022	0.670349	0.695958	0.608521	0.739712	0.258617	0.379963	0.580914	0.30207	0.379882	0.335591	0.27042	0.466548	0.372146	0.387468	0.481131	0.205305	0.475281	0.355664	0.407971	0.32848	0.385849	0.360633	0.341496	0.309674	0.376197	0.4191	0.419641	0.470234	0.321043
195.639	0.702059	0.794395	0.740867	0.61649	0.661376	0.758843	0.703703	0.726492	0.822231	0.731922	0.675909	0.754694	0.8111	0.614184	0.747238	0.679083	0.641804	0.632781	0.53249	0.692095	0.638651	0.70664	0.610563	0.743182	0.249009	0.388046	0.567695	0.295571	0.330646	0.310518	0.259167	0.47765	0.382336	0.411713	0.487392	0.190014	0.496514	0.357768	0.394672	0.30323	0.384483	0.359642	0.334753	0.310569	0.373192	0.421561	0.418817	0.457433	0.322919
196.639	0.727199	0.796825	0.732661	0.610483	0.681708	0.748375	0.675244	0.742999	0.816484	0.715307	0.671037	0.728775	0.803455	0.602028	0.732554	0.656563	0.637938	0.633362	0.552787	0.69891	0.642308	0.71689	0.625321	0.746757	0.249248	0.385733	0.563963	0.2918	0.293745	0.320993	0.248797	0.449394	0.384231	0.402811	0.452785	0.21601	0.495472	0.3517	0.369899	0.307139	0.379813	0.353313	0.34398	0.323392	0.358385	0.441732	0.427307	0.458366	0.310993
197.639	0.739307	0.845169	0.749501	0.649123	0.699723	0.784442	0.718118	0.762105	0.822425	0.701162	0.699181	0.717142	0.805722	0.615458	0.754667	0.669226	0.597978	0.637088	0.555122	0.71467	0.640504	0.701823	0.619823	0.761638	0.250767	0.395647	0.576121	0.300341	0.35938	0.330698	0.26747	0.488351	0.380901	0.412281	0.465935	0.197842	0.460746	0.351754	0.394033	0.31499	0.381856	0.365872	0.351993	0.307862	0.365882	0.438034	0.402338	0.464475	0.323252
198.638	0.740578	0.836602	0.740462	0.639511	0.668863	0.783439	0.721643	0.735053	0.815631	0.719354	0.687156	0.729494	0.765828	0.612821	0.739702	0.681651	0.62612	0.632585	0.550893	0.673426	0.640406	0.718659	0.627066	0.73694	0.255158	0.364839	0.566248	0.286473	0.326034	0.322691	0.259777	0.4535	0.379911	0.417684	0.484568	0.210306	0.480775	0.369749	0.401184	0.280001	0.381188	0.361394	0.33543	0.322619	0.370243	0.423626	0.42455	0.461634	0.314412
199.639	0.711822	0.839901	0.714053	0.597599	0.710187	0.768426	0.704677	0.754524	0.866146	0.729414	0.697027	0.750182	0.851545	0.661946	0.761095	0.700738	0.633571	0.637707	0.564404	0.712902	0.655604	0.744343	0.627944	0.759166	0.260961	0.373281	0.574982	0.297088	0.33006	0.319799	0.25265	0.474839	0.384482	0.391586	0.478713	0.219391	0.507066	0.365014	0.371711	0.297465	0.3863	0.344231	0.346265	0.32878	0.367913	0.42238	0.421099	0.465839	0.325534
200.639	0.722104	0.832046	0.727175	0.639118	0.668081	0.767717	0.689477	0.729871	0.848169	0.724058	0.686824	0.713104	0.829058	0.628484	0.769957	0.685555	0.610042	0.596585	0.544864	0.674415	0.627126	0.70101	0.611687	0.743744	0.241749	0.3738	0.570839	0.290961	0.344544	0.326275	0.253605	0.454354	0.380218	0.410998	0.498554	0.22052	0.496473	0.377207	0.391716	0.318725	0.384355	0.358062	0.345527	0.326793	0.367405	0.439012	0.41538	0.458799	0.314668
201.639	0.720824	0.851242	0.724455	0.648155	0.69795	0.802529	0.714998	0.748389	0.837377	0.735749	0.669976	0.729557	0.778913	0.628318	0.743267	0.681661	0.648895	0.630317	0.554268	0.679142	0.659866	0.696512	0.606425	0.776128	0.246042	0.402135	0.594424	0.306306	0.337276	0.342595	0.256038	0.475788	0.38227	0.404807	0.466424	0.185619	0.477855	0.358791	0.372067	0.280512	0.394691	0.359083	0.35116	0.321833	0.360769	0.434037	0.432321	0.462748	0.320966
202.639	0.744132	0.833417	0.72986	0.617817	0.709386	0.787719	0.706542	0.770024	0.82262	0.728857	0.710487	0.710625	0.809629	0.618479	0.731699	0.683122	0.649662	0.626773	0.539708	0.706125	0.648802	0.69569	0.613386	0.763432	0.259012	0.382045	0.579366	0.292885	0.367898	0.327543	0.260167	0.471506	0.388366	0.407354	0.470847	0.218142	0.506045	0.366882	0.392357	0.304361	0.392765	0.352295	0.346818	0.319245	0.368585	0.436691	0.426403	0.463916	0.315643
203.638	0.727659	0.841506	0.714622	0.617822	0.687194	0.761017	0.698014	0.755129	0.820597	0.701497	0.68544	0.749171	0.802097	0.625217	0.720961	0.678732	0.641606	0.630017	0.558899	0.707493	0.658879	0.746444	0.620278	0.775444	0.265527	0.405581	0.587524	0.301348	0.345841	0.322975	0.259987	0.467081	0.392358	0.422867	0.482983	0.198036	0.488436	0.368283	0.38055	0.27925	0.389092	0.359009	0.34818	0.332531	0.388668	0.432751	0.432223	0.45788	0.322892
204.639	0.722022	0.840297	0.735521	0.592874	0.672359	0.779766	0.692423	0.7467	0.820913	0.724976	0.678854	0.735232	0.813883	0.647948	0.744783	0.686578	0.680744	0.635516	0.555623	0.745054	0.671198	0.764799	0.626517	0.793526	0.242988	0.387511	0.580203	0.296205	0.358901	0.333399	0.260297	0.456247	0.377065	0.422775	0.486719	0.190645	0.4754	0.351473	0.359101	0.293034	0.393911	0.35873	0.34756	0.31764	0.36201	0.433957	0.433269	0.47504	0.317923
205.639	0.75129	0.867191	0.743976	0.653769	0.668528	0.783871	0.712395	0.769819	0.821347	0.716267	0.693655	0.747616	0.835283	0.638326	0.745076	0.667972	0.65033	0.634562	0.561744	0.733203	0.677736	0.731055	0.647291	0.785477	0.259642	0.383459	0.59329	0.30313	0.326194	0.340056	0.248461	0.475393	0.389423	0.425896	0.505099	0.230091	0.504259	0.382235	0.378815	0.311125	0.384739	0.356336	0.35961	0.320518	0.366411	0.422805	0.439604	0.472588	0.312306
206.639	0.711131	0.83339	0.7057	0.61141	0.6776	0.782701	0.684997	0.721548	0.803265	0.714269	0.648549	0.75534	0.792571	0.605131	0.724801	0.651411	0.647029	0.649206	0.565153	0.707845	0.689663	0.737029	0.660295	0.779338	0.252414	0.35977	0.595255	0.297157	0.335341	0.337002	0.266309	0.449221	0.387418	0.405652	0.488937	0.207072	0.497197	0.384313	0.384288	0.302823	0.381175	0.339551	0.341493	0.334484	0.368358	0.418352	0.41666	0.465561	0.322449
207.639	0.694939	0.812649	0.710701	0.585502	0.658902	0.785305	0.677859	0.730979	0.801098	0.737377	0.665029	0.73894	0.774406	0.589234	0.723025	0.645141	0.650877	0.644814	0.5568	0.716486	0.680596	0.729002	0.634648	0.772499	0.26444	0.379935	0.582571	0.300882	0.381366	0.335077	0.263124	0.484688	0.385538	0.408165	0.488052	0.223488	0.512129	0.350847	0.36804	0.307707	0.388568	0.362148	0.343322	0.349013	0.377624	0.439221	0.439302	0.46481	0.327078
208.638	0.685906	0.840311	0.695068	0.606271	0.698865	0.77807	0.690812	0.746609	0.79525	0.723297	0.660379	0.7527	0.801376	0.626959	0.720055	0.665978	0.662613	0.661397	0.559979	0.707771	0.662558	0.727514	0.651268	0.757284	0.256419	0.396387	0.576065	0.304864	0.34039	0.337508	0.267393	0.433754	0.394378	0.440483	0.508145	0.240767	0.497013	0.373608	0.392474	0.320546	0.377407	0.352522	0.348395	0.329329	0.374442	0.45366	0.448783	0.480558	0.320721
209.639	0.730595	0.806684	0.712082	0.617607	0.681885	0.788202	0.682226	0.719825	0.785943	0.73033	0.68619	0.766584	0.810676	0.619575	0.718905	0.678024	0.680188	0.661464	0.573259	0.717082	0.711286	0.7563	0.643761	0.790163	0.252978	0.366827	0.569508	0.297541	0.386143	0.336696	0.266046	0.452829	0.374775	0.426827	0.505611	0.218871	0.49394	0.343156	0.380436	0.28472	0.393446	0.35798	0.348002	0.333492	0.369795	0.432962	0.443869	0.475251	0.319065
210.639	0.730862	0.861334	0.700113	0.625506	0.709952	0.800312	0.69289	0.73771	0.808166	0.730258	0.680226	0.771825	0.753098	0.647714	0.722648	0.672303	0.661767	0.681215	0.564125	0.701252	0.663282	0.746394	0.64033	0.763565	0.232242	0.353621	0.582288	0.300695	0.32272	0.326368	0.257839	0.447196	0.369196	0.401877	0.492141	0.182923	0.471621	0.354436	0.379486	0.312646	0.385914	0.355878	0.349247	0.316947	0.355469	0.431781	0.435309	0.463352	0.318246
211.638	0.735454	0.823946	0.725757	0.605831	0.698702	0.774062	0.695836	0.738797	0.807164	0.732729	0.658324	0.756298	0.773284	0.600974	0.71214	0.657545	0.636351	0.660024	0.544844	0.689029	0.648876	0.711646	0.625012	0.791476	0.243569	0.370357	0.574723	0.300222	0.333019	0.345271	0.260993	0.447768	0.392149	0.416532	0.485319	0.220596	0.504261	0.355434	0.415903	0.302799	0.379696	0.359185	0.345968	0.342832	0.379029	0.426079	0.431819	0.476348	0.318785
212.639	0.713739	0.85137	0.711056	0.635909	0.678619	0.791194	0.714763	0.747899	0.79881	0.729717	0.667903	0.752019	0.768484	0.597427	0.734565	0.663337	0.6148	0.662901	0.525847	0.678512	0.650616	0.740657	0.622503	0.764427	0.249901	0.358307	0.585408	0.306296	0.358116	0.333874	0.271737	0.427388	0.380313	0.411533	0.494241	0.226423	0.560395	0.372273	0.391905	0.287365	0.372868	0.362679	0.368856	0.322332	0.357207	0.441803	0.414504	0.468056	0.315852
213.638	0.679226	0.870917	0.746374	0.674301	0.711866	0.813023	0.723059	0.749777	0.77206	0.699286	0.663084	0.731082	0.788256	0.585397	0.718046	0.649389	0.651414	0.674293	0.542308	0.686257	0.66935	0.707474	0.617488	0.757644	0.253998	0.38305	0.592494	0.303447	0.373604	0.334119	0.264297	0.462433	0.369942	0.39944	0.463041	0.21513	0.511452	0.343177	0.404373	0.277287	0.386423	0.360469	0.359916	0.336992	0.354183	0.43995	0.433592	0.472274	0.313305
214.639	0.689538	0.819904	0.692407	0.598807	0.683922	0.763388	0.70746	0.731558	0.803038	0.710625	0.632106	0.736091	0.791496	0.584183	0.720401	0.654984	0.61627	0.647012	0.53007	0.680919	0.632357	0.732899	0.641358	0.750619	0.252142	0.37864	0.568981	0.30066	0.354787	0.339846	0.254445	0.472563	0.398208	0.42079	0.474659	0.252658	0.523115	0.39054	0.422411	0.314571	0.381108	0.351652	0.345641	0.333804	0.356059	0.449084	0.426008	0.468566	0.316166
215.639	0.726248	0.834141	0.737922	0.642145	0.704868	0.793786	0.694619	0.749357	0.80937	0.729153	0.682127	0.745737	0.79681	0.602535	0.739681	0.667453	0.645092	0.648167	0.542825	0.701801	0.679139	0.711867	0.632167	0.762834	0.247567	0.371822	0.580509	0.304537	0.339602	0.340373	0.257522	0.467631	0.38848	0.425688	0.456175	0.230434	0.543491	0.370195	0.414174	0.30897	0.381283	0.35486	0.358212	0.323641	0.383222	0.44383	0.433765	0.480318	0.319579
216.638	0.72877	0.840017	0.745972	0.632586	0.669371	0.780153	0.71105	0.758838	0.787027	0.706538	0.663836	0.764577	0.782873	0.58166	0.726563	0.660105	0.611699	0.62942	0.523891	0.676222	0.660037	0.69702	0.62677	0.773643	0.25188	0.354541	0.593773	0.296945	0.366946	0.329788	0.261565	0.445856	0.389717	0.425538	0.484924	0.208126	0.515323	0.365137	0.387471	0.291442	0.379025	0.347382	0.350061	0.307383	0.357313	0.432198	0.414657	0.466312	0.317063
217.639	0.701136	0.815689	0.702968	0.609069	0.690759	0.788562	0.682813	0.730495	0.790444	0.700997	0.639994	0.762433	0.764639	0.557652	0.707417	0.656155	0.585293	0.637321	0.531788	0.71112	0.676615	0.7201	0.625253	0.735301	0.246571	0.347289	0.592803	0.291036	0.397091	0.336426	0.258541	0.463942	0.388475	0.422212	0.500426	0.22063	0.520338	0.371008	0.401998	0.324594	0.384967	0.361434	0.353054	0.317919	0.356825	0.433438	0.445643	0.458582	0.319711
218.638	0.701043	0.832824	0.734652	0.633212	0.708203	0.787573	0.717656	0.762908	0.807386	0.728093	0.643503	0.733667	0.782041	0.605286	0.708969	0.645701	0.615499	0.652696	0.535637	0.706577	0.6703	0.718553	0.605617	0.743584	0.257573	0.357548	0.590346	0.293844	0.3605	0.342342	0.264612	0.448192	0.387711	0.399281	0.479211	0.200252	0.513242	0.403281	0.419884	0.310451	0.375535	0.35053	0.354248	0.332585	0.373878	0.445633	0.436524	0.478619	0.321335
219.639	0.695067	0.844401	0.740676	0.628041	0.697448	0.807713	0.708945	0.767444	0.789353	0.723606	0.638557	0.71967	0.772865	0.592132	0.716081	0.655826	0.621572	0.667847	0.546224	0.706178	0.660367	0.709016	0.61802	0.763452	0.237154	0.357985	0.593558	0.290009	0.341243	0.331198	0.256822	0.457222	0.373389	0.387587	0.477786	0.237981	0.517779	0.365174	0.417603	0.28659	0.378202	0.359474	0.365136	0.333766	0.350904	0.444482	0.436427	0.48586	0.317293
220.639	0.711029	0.834562	0.713947	0.611767	0.708571	0.801681	0.693444	0.774635	0.811822	0.724421	0.652296	0.720305	0.776589	0.608516	0.717705	0.646937	0.598534	0.647081	0.542327	0.703104	0.667328	0.708463	0.612295	0.744039	0.25462	0.379459	0.586099	0.287538	0.364379	0.335636	0.273224	0.473628	0.371385	0.39334	0.468143	0.213133	0.527086	0.352932	0.391819	0.281562	0.405405	0.354284	0.360224	0.338207	0.392483	0.44326	0.45374	0.497436	0.325595
221.638	0.70781	0.816715	0.705029	0.63064	0.682273	0.790677	0.712477	0.746759	0.827105	0.73951	0.664217	0.746199	0.797323	0.605715	0.722829	0.656178	0.609763	0.620135	0.535793	0.686966	0.638281	0.692618	0.615115	0.731598	0.25703	0.394125	0.590663	0.288349	0.348678	0.326819	0.262989	0.455771	0.378524	0.402773	0.46603	0.202807	0.509009	0.36466	0.367735	0.29293	0.383244	0.363762	0.350971	0.331777	0.373491	0.433072	0.438585	0.491027	0.320359
222.639	0.72233	0.85116	0.734524	0.630324	0.690823	0.789083	0.707249	0.746438	0.804474	0.736026	0.664784	0.762324	0.783475	0.608111	0.732025	0.673863	0.616178	0.616096	0.536527	0.690606	0.645088	0.678659	0.628815	0.741347	0.244616	0.345171	0.599737	0.28314	0.390294	0.330806	0.267121	0.426628	0.379888	0.389382	0.46085	0.213376	0.519663	0.366286	0.389703	0.309391	0.376141	0.353937	0.355152	0.325572	0.374695	0.440165	0.441713	0.489857	0.327538
223.638	0.725623	0.836926	0.721033	0.62848	0.706671	0.790336	0.683679	0.752042	0.789967	0.691219	0.640375	0.742745	0.765429	0.6205	0.710045	0.630534	0.656602	0.643628	0.533369	0.659463	0.666884	0.711117	0.60099	0.750722	0.26384	0.382233	0.599332	0.291399	0.350047	0.320422	0.258013	0.468185	0.397679	0.415908	0.471891	0.237989	0.535674	0.3787	0.388677	0.32262	0.393701	0.358023	0.356596	0.327994	0.364683	0.434487	0.435729	0.492266	0.317578
224.639	0.721493	0.839449	0.733891	0.65291	0.713523	0.787431	0.700301	0.757385	0.785983	0.693924	0.639612	0.735114	0.780784	0.602225	0.698839	0.64698	0.648212	0.66776	0.556816	0.713817	0.674144	0.748269	0.628731	0.781014	0.258107	0.370066	0.592181	0.295683	0.378594	0.325824	0.257591	0.451352	0.373271	0.416596	0.479947	0.209141	0.521775	0.373212	0.380254	0.310268	0.385264	0.354172	0.360435	0.322532	0.370137	0.441467	0.463631	0.477119	0.325228
225.639	0.717668	0.83397	0.697934	0.646707	0.680628	0.784518	0.680835	0.742875	0.796987	0.727292	0.660333	0.736297	0.769392	0.605616	0.71169	0.633499	0.648023	0.634832	0.554239	0.688787	0.672965	0.744204	0.607903	0.784775	0.259123	0.377227	0.606632	0.30075	0.359311	0.355324	0.278404	0.481293	0.371903	0.418277	0.497288	0.222272	0.525144	0.383857	0.388694	0.300342	0.382503	0.370352	0.367062	0.335537	0.380324	0.449926	0.462347	0.491405	0.32853
226.638	0.71405	0.806027	0.731546	0.657967	0.684214	0.78656	0.682856	0.745699	0.785601	0.713945	0.653847	0.760632	0.780474	0.593314	0.704522	0.62754	0.572679	0.619734	0.534024	0.669368	0.682625	0.708512	0.582036	0.77466	0.246948	0.347209	0.601197	0.286349	0.336448	0.326338	0.263785	0.460392	0.365495	0.413902	0.507498	0.183214	0.51322	0.378597	0.359578	0.333562	0.382668	0.359554	0.359098	0.326815	0.364495	0.433711	0.450011	0.479747	0.320205
227.639	0.74103	0.817896	0.72034	0.617365	0.683846	0.800173	0.697244	0.737884	0.795362	0.720597	0.637002	0.758438	0.793152	0.636224	0.69647	0.653414	0.612997	0.639309	0.544021	0.68314	0.656929	0.705879	0.602853	0.77429	0.243236	0.355442	0.597549	0.288702	0.345549	0.347442	0.262508	0.424063	0.372531	0.417839	0.511804	0.219657	0.518852	0.355627	0.361971	0.321189	0.393656	0.356554	0.352856	0.336604	0.361516	0.450416	0.450975	0.479799	0.324874
228.639	0.736704	0.849749	0.74144	0.637074	0.699194	0.777496	0.681782	0.763769	0.804151	0.71845	0.671833	0.762936	0.804296	0.633923	0.736986	0.675147	0.623349	0.628194	0.540074	0.690993	0.669956	0.695565	0.613632	0.757972	0.249819	0.36852	0.590452	0.289064	0.38642	0.352818	0.265925	0.466887	0.381116	0.420264	0.508943	0.22138	0.519922	0.386581	0.386421	0.317148	0.380779	0.353766	0.361546	0.327003	0.383751	0.43309	0.43226	0.491188	0.319723
229.639	0.728202	0.837248	0.72883	0.651389	0.720373	0.780767	0.698019	0.731709	0.799444	0.705348	0.666672	0.768057	0.802383	0.64933	0.726672	0.653786	0.602548	0.634841	0.556153	0.70486	0.667866	0.690063	0.619513	0.759281	0.256151	0.361866	0.598393	0.291484	0.393152	0.336113	0.262512	0.46507	0.382586	0.418695	0.521001	0.227791	0.533477	0.370532	0.395834	0.286908	0.390506	0.358152	0.361768	0.323159	0.360438	0.4458	0.454088	0.486159	0.310204
230.639	0.740043	0.819943	0.688447	0.62279	0.68638	0.778901	0.676864	0.741081	0.800461	0.725537	0.68105	0.736492	0.80378	0.655231	0.721638	0.66468	0.605487	0.641119	0.528042	0.684479	0.655945	0.694593	0.589685	0.751211	0.245108	0.350454	0.600478	0.289695	0.412795	0.352378	0.26391	0.457672	0.380725	0.397444	0.499983	0.208917	0.533364	0.369224	0.415619	0.312297	0.400192	0.373118	0.367418	0.34433	0.371961	0.435266	0.437482	0.493128	0.307214
231.638	0.723726	0.851433	0.702449	0.649769	0.708316	0.768329	0.666957	0.771613	0.791612	0.68884	0.656246	0.750601	0.786134	0.631756	0.694788	0.661886	0.627242	0.637248	0.554024	0.695662	0.698974	0.72226	0.63686	0.785324	0.242126	0.341534	0.589597	0.292019	0.345281	0.351268	0.264471	0.478206	0.365384	0.403514	0.485066	0.206691	0.503059	0.363411	0.354713	0.322879	0.405335	0.367837	0.365428	0.325883	0.361257	0.445484	0.452531	0.478164	0.317484
232.639	0.733846	0.832359	0.720425	0.624974	0.707796	0.78992	0.717103	0.772804	0.799661	0.714128	0.661061	0.723256	0.827215	0.624185	0.71484	0.65814	0.629719	0.642171	0.545148	0.684919	0.664017	0.734835	0.620179	0.788662	0.246673	0.368814	0.588914	0.297641	0.391697	0.343196	0.243992	0.470626	0.382648	0.411134	0.501398	0.232708	0.533689	0.366683	0.397815	0.300251	0.395907	0.380581	0.36671	0.334409	0.380226	0.45265	0.444084	0.496622	0.320228
233.639	0.745129	0.825118	0.724761	0.598576	0.703781	0.770052	0.662593	0.754412	0.774119	0.714239	0.662204	0.745821	0.767647	0.586748	0.703914	0.641754	0.652274	0.680167	0.551444	0.733877	0.681125	0.73813	0.632862	0.810532	0.245774	0.379822	0.583239	0.29498	0.385373	0.343084	0.261221	0.473106	0.366529	0.408342	0.484883	0.216184	0.51119	0.349281	0.398184	0.295731	0.399967	0.374544	0.379351	0.360345	0.385762	0.457435	0.468449	0.493028	0.330062
234.639	0.761675	0.856881	0.749814	0.640375	0.722599	0.84682	0.714478	0.754051	0.794789	0.726269	0.66177	0.751511	0.802727	0.629151	0.701553	0.654337	0.650033	0.611362	0.52302	0.692739	0.686932	0.708701	0.617127	0.781946	0.247605	0.354589	0.589506	0.297348	0.371587	0.345419	0.259164	0.441291	0.383238	0.426402	0.497592	0.204055	0.574417	0.372846	0.389303	0.306377	0.399873	0.364391	0.367686	0.354143	0.37866	0.446309	0.467547	0.48823	0.321527
235.639	0.739658	0.829586	0.748494	0.626272	0.707964	0.806922	0.722425	0.763506	0.803611	0.722396	0.643477	0.738977	0.803386	0.592433	0.692361	0.634388	0.621291	0.64875	0.539794	0.702692	0.664985	0.70385	0.609259	0.764523	0.243888	0.332399	0.599757	0.289784	0.355841	0.354482	0.267481	0.45936	0.386772	0.409818	0.506394	0.237994	0.530204	0.371621	0.406482	0.293836	0.408308	0.374722	0.367921	0.339942	0.376927	0.461933	0.463734	0.492802	0.319648
236.638	0.731759	0.832957	0.740372	0.637201	0.725732	0.790655	0.685224	0.752048	0.814473	0.725158	0.65315	0.756379	0.79502	0.602992	0.701627	0.656503	0.639638	0.673187	0.544888	0.733664	0.702086	0.719609	0.637231	0.793177	0.238675	0.344882	0.61752	0.29873	0.374157	0.355136	0.276525	0.474912	0.378447	0.410371	0.506229	0.237982	0.555389	0.366076	0.407095	0.318877	0.392769	0.358663	0.366147	0.326072	0.365703	0.450568	0.468727	0.489909	0.316884
237.639	0.733201	0.825002	0.723941	0.61554	0.705011	0.782332	0.661424	0.735863	0.813941	0.752114	0.674788	0.775979	0.821719	0.617997	0.720894	0.669039	0.618439	0.637408	0.527928	0.712292	0.656329	0.691059	0.62872	0.799403	0.24348	0.375604	0.597444	0.288417	0.370042	0.360299	0.274279	0.485889	0.383083	0.402223	0.497171	0.198791	0.533345	0.351411	0.380092	0.300031	0.397228	0.366879	0.374376	0.337231	0.369084	0.478479	0.479613	0.489555	0.329853
238.639	0.710073	0.812785	0.727473	0.629742	0.707172	0.798209	0.663609	0.722526	0.790413	0.739212	0.684988	0.725169	0.795329	0.570184	0.734027	0.639754	0.638104	0.636887	0.527581	0.695948	0.662752	0.708161	0.604454	0.78919	0.246231	0.362567	0.600992	0.295892	0.381445	0.336685	0.270771	0.476916	0.386354	0.385828	0.4805	0.234481	0.529589	0.363372	0.378364	0.297576	0.398259	0.355071	0.364924	0.3336	0.360211	0.44669	0.46048	0.483153	0.335457
239.639	0.756749	0.839628	0.715565	0.65472	0.717462	0.793197	0.722517	0.748024	0.806395	0.717779	0.671084	0.715457	0.79532	0.594421	0.699713	0.629337	0.629019	0.631987	0.527898	0.691656	0.648039	0.683953	0.607906	0.779257	0.231332	0.376678	0.595881	0.290708	0.362966	0.33727	0.255961	0.454725	0.409202	0.427276	0.514791	0.196641	0.534921	0.34215	0.381303	0.315196	0.412942	0.375706	0.371539	0.340841	0.385866	0.463568	0.465532	0.480752	0.31903
240.639	0.736033	0.832175	0.745488	0.621481	0.695264	0.795126	0.68283	0.744831	0.777036	0.70184	0.660453	0.717911	0.775207	0.600986	0.694995	0.648234	0.613213	0.614356	0.517058	0.696154	0.654142	0.696218	0.621175	0.784121	0.235496	0.357399	0.580265	0.286484	0.348491	0.349742	0.259984	0.455185	0.40032	0.43482	0.495307	0.237858	0.576665	0.383429	0.392738	0.339216	0.417176	0.369033	0.369277	0.338918	0.380323	0.452851	0.461116	0.493988	0.317538
241.638	0.747407	0.831303	0.727621	0.614787	0.687044	0.799196	0.698912	0.737809	0.763792	0.714947	0.652068	0.709577	0.77417	0.607337	0.702483	0.620767	0.616679	0.635524	0.523094	0.684278	0.658316	0.73786	0.617605	0.775399	0.233347	0.344709	0.614115	0.289715	0.380462	0.36016	0.261939	0.448799	0.398039	0.421585	0.509591	0.250647	0.554137	0.35952	0.400573	0.331822	0.411764	0.385193	0.385074	0.332937	0.390836	0.462156	0.479677	0.499841	0.322413
242.639	0.714842	0.823331	0.70779	0.621771	0.684409	0.812586	0.694108	0.733431	0.789236	0.713472	0.667005	0.740982	0.777455	0.629011	0.719361	0.656727	0.599547	0.634394	0.527923	0.695373	0.63763	0.71297	0.616557	0.784612	0.247949	0.366707	0.599417	0.289447	0.363031	0.345803	0.265117	0.469697	0.376451	0.408158	0.485139	0.253994	0.551014	0.337736	0.375531	0.319292	0.403282	0.385076	0.376524	0.338215	0.391337	0.473891	0.495647	0.51163	0.316309
243.639	0.714651	0.83988	0.702275	0.637321	0.678107	0.79686	0.678926	0.738813	0.814658	0.732486	0.693478	0.72832	0.797284	0.62897	0.716582	0.66592	0.645286	0.650837	0.543537	0.721761	0.661269	0.750358	0.634274	0.816692	0.236961	0.357632	0.615054	0.291949	0.34702	0.36546	0.257135	0.445103	0.389029	0.434587	0.500082	0.226261	0.57484	0.365087	0.394964	0.342608	0.398913	0.370089	0.387993	0.32867	0.381646	0.464699	0.491911	0.500211	0.309399
244.639	0.726367	0.860961	0.738582	0.646782	0.708159	0.813572	0.725621	0.763479	0.801205	0.686966	0.666716	0.719917	0.782477	0.610787	0.712537	0.639041	0.62118	0.618921	0.512296	0.708081	0.651603	0.703416	0.607471	0.799319	0.238161	0.373448	0.601736	0.290209	0.369349	0.364253	0.260707	0.455794	0.391325	0.39375	0.508242	0.209268	0.550328	0.368967	0.379517	0.314958	0.398888	0.372618	0.373696	0.318179	0.399361	0.470942	0.4892	0.487194	0.33181
245.639	0.733967	0.853544	0.724642	0.601078	0.714502	0.779668	0.679073	0.745404	0.799659	0.709093	0.677147	0.74737	0.810245	0.644659	0.713205	0.658431	0.60225	0.605473	0.516247	0.657741	0.661747	0.710568	0.601932	0.764592	0.240332	0.333631	0.601203	0.283224	0.37311	0.374263	0.253503	0.467188	0.375703	0.426487	0.49659	0.233371	0.556585	0.356164	0.381798	0.326784	0.40114	0.383421	0.362968	0.312521	0.394139	0.469764	0.483698	0.497922	0.316643
246.638	0.731241	0.840242	0.699628	0.622242	0.693591	0.774517	0.666834	0.71748	0.76577	0.699919	0.643594	0.719096	0.780115	0.6045	0.698771	0.647915	0.638791	0.643673	0.527308	0.724271	0.700409	0.727778	0.62699	0.79494	0.244197	0.370646	0.601411	0.287581	0.420574	0.365858	0.267674	0.48522	0.39002	0.422781	0.492827	0.206804	0.565671	0.34986	0.40037	0.325644	0.391385	0.367707	0.36766	0.323309	0.38433	0.462115	0.483471	0.486855	0.318474
247.639	0.720946	0.85834	0.712366	0.617683	0.706931	0.798162	0.667133	0.726929	0.782003	0.683235	0.672345	0.751423	0.775339	0.620302	0.708861	0.668827	0.613523	0.659597	0.53792	0.713966	0.691239	0.717178	0.628926	0.799287	0.228667	0.331183	0.591275	0.286635	0.365582	0.34482	0.265095	0.456431	0.393273	0.425312	0.531842	0.237776	0.575959	0.358083	0.394805	0.336746	0.415751	0.37177	0.373237	0.32585	0.380416	0.466345	0.494554	0.481774	0.317458
248.639	0.725863	0.841678	0.73731	0.642778	0.678572	0.752167	0.669411	0.720104	0.798644	0.692439	0.66121	0.719591	0.775744	0.610402	0.718884	0.662569	0.678548	0.653265	0.545742	0.726927	0.690668	0.67755	0.619725	0.782157	0.240348	0.37329	0.588091	0.289226	0.366353	0.361722	0.257011	0.450105	0.380635	0.399928	0.471075	0.209929	0.554077	0.340769	0.37509	0.325674	0.39606	0.380285	0.370256	0.336605	0.378717	0.451591	0.456029	0.490533	0.324289
249.639	0.712962	0.842083	0.753512	0.654116	0.709025	0.781276	0.711328	0.740596	0.796052	0.713705	0.671621	0.72301	0.76859	0.614618	0.703384	0.641401	0.605475	0.648414	0.539489	0.725616	0.671958	0.69027	0.629388	0.79847	0.233046	0.357585	0.595712	0.289165	0.38456	0.356021	0.276942	0.447819	0.400011	0.394358	0.497245	0.24062	0.583923	0.366544	0.388622	0.313135	0.411164	0.375582	0.377758	0.337391	0.382416	0.468527	0.47996	0.495662	0.311605
250.639	0.733335	0.834523	0.741387	0.655907	0.700851	0.776003	0.681128	0.7515	0.798601	0.705588	0.666276	0.715487	0.784936	0.595131	0.720575	0.611655	0.625747	0.613603	0.526824	0.705105	0.676879	0.71131	0.624168	0.767616	0.246172	0.366481	0.607001	0.293355	0.371403	0.362248	0.263265	0.489977	0.376477	0.405226	0.492514	0.228471	0.546028	0.344178	0.396044	0.332909	0.400614	0.373086	0.377179	0.324834	0.375783	0.478488	0.463851	0.492386	0.310144
251.638	0.727794	0.833079	0.70556	0.63192	0.705754	0.769715	0.657467	0.758845	0.812592	0.719479	0.68042	0.740529	0.776539	0.613488	0.727219	0.659321	0.627391	0.603509	0.52037	0.689787	0.692889	0.69252	0.602877	0.75259	0.241134	0.369622	0.610354	0.293187	0.398238	0.353657	0.275299	0.482168	0.396544	0.399346	0.500848	0.220833	0.59958	0.344335	0.373387	0.339726	0.40376	0.365596	0.383434	0.332935	0.388713	0.469155	0.48004	0.490111	0.311412
252.639	0.730074	0.814107	0.729325	0.646522	0.684183	0.769708	0.640634	0.746551	0.780276	0.727485	0.688949	0.75833	0.771762	0.630318	0.714343	0.647593	0.622783	0.60471	0.530077	0.691893	0.661971	0.68322	0.607553	0.754681	0.25446	0.350157	0.588687	0.289811	0.362811	0.36023	0.26996	0.470187	0.397089	0.420392	0.501765	0.228849	0.571135	0.359864	0.390539	0.330948	0.398237	0.363078	0.386729	0.335015	0.378568	0.467629	0.50021	0.502556	0.311706
253.639	0.752984	0.873034	0.747437	0.653209	0.730395	0.784036	0.688436	0.773968	0.786538	0.706665	0.710809	0.744187	0.779078	0.636976	0.712473	0.645202	0.645326	0.632866	0.535145	0.707882	0.680759	0.730228	0.62242	0.796246	0.242108	0.33052	0.588062	0.293619	0.363967	0.351624	0.2685	0.434911	0.402069	0.411563	0.504656	0.222346	0.599783	0.364813	0.399884	0.302874	0.415821	0.362831	0.371028	0.319011	0.385435	0.472707	0.487545	0.486832	0.31429
254.638	0.707798	0.874277	0.739586	0.6218	0.716694	0.808608	0.692079	0.755015	0.790104	0.74315	0.678537	0.749456	0.772466	0.634352	0.705099	0.639429	0.625595	0.604109	0.537096	0.696207	0.687574	0.730382	0.609483	0.805246	0.230191	0.346227	0.60063	0.289169	0.358285	0.364685	0.264803	0.462332	0.379658	0.434831	0.501223	0.245835	0.572218	0.359318	0.385575	0.32053	0.413846	0.380068	0.378618	0.317493	0.396305	0.489089	0.497636	0.501763	0.314034
255.639	0.727486	0.855247	0.719878	0.660707	0.724022	0.788524	0.668163	0.760304	0.765487	0.701558	0.651505	0.741444	0.767739	0.606755	0.690176	0.64546	0.626805	0.635424	0.539472	0.722452	0.70726	0.740794	0.63167	0.778689	0.231597	0.344506	0.601017	0.292318	0.396847	0.348203	0.269962	0.458898	0.406932	0.42369	0.509202	0.257619	0.547952	0.345849	0.38519	0.306911	0.413562	0.370623	0.380895	0.330494	0.390835	0.470593	0.492763	0.483773	0.308498
256.638	0.737594	0.851646	0.728524	0.620215	0.709183	0.811586	0.683606	0.759018	0.765045	0.71726	0.685501	0.721698	0.7572	0.619576	0.694568	0.642082	0.617489	0.591981	0.535476	0.712602	0.670525	0.728206	0.635301	0.750533	0.2354	0.371328	0.602342	0.292284	0.364305	0.348677	0.269985	0.430571	0.383852	0.4007	0.497309	0.245777	0.541731	0.350862	0.397172	0.289222	0.418908	0.37189	0.386496	0.340258	0.401318	0.467091	0.51567	0.484771	0.326963
257.639	0.733725	0.888406	0.723537	0.599601	0.705792	0.784129	0.658007	0.743453	0.791556	0.735083	0.695763	0.734737	0.785421	0.602442	0.699293	0.666935	0.635455	0.63365	0.536907	0.683107	0.687417	0.754736	0.62072	0.766423	0.225711	0.345583	0.610581	0.291168	0.355603	0.362845	0.25857	0.457226	0.387238	0.396603	0.478937	0.224948	0.561863	0.346616	0.377059	0.316773	0.401564	0.359654	0.376694	0.314147	0.386801	0.462785	0.48222	0.477072	0.323089
258.639	0.725653	0.856525	0.712403	0.616296	0.716498	0.800189	0.7083	0.749145	0.777854	0.695928	0.70385	0.720446	0.795891	0.593708	0.705298	0.642913	0.625679	0.619506	0.521902	0.697824	0.686037	0.709226	0.617495	0.778968	0.233348	0.355224	0.607225	0.291285	0.367942	0.348809	0.266315	0.458335	0.402106	0.411968	0.499612	0.239934	0.561289	0.361899	0.371306	0.306533	0.425641	0.362189	0.3822	0.313471	0.397974	0.476403	0.492751	0.475585	0.321666
259.639	0.724798	0.878755	0.720871	0.62748	0.698975	0.756919	0.674042	0.719604	0.805063	0.680426	0.665958	0.697597	0.772991	0.576116	0.710194	0.642578	0.652249	0.639404	0.531207	0.685065	0.700449	0.701827	0.626858	0.762065	0.2387	0.363517	0.607795	0.287862	0.371497	0.356815	0.272651	0.473549	0.382526	0.419235	0.524747	0.249171	0.59681	0.356753	0.393231	0.347872	0.392214	0.364007	0.380775	0.31113	0.382881	0.484875	0.497899	0.49185	0.312809
260.639	0.744918	0.84961	0.719357	0.605878	0.733685	0.799903	0.679726	0.735208	0.834954	0.702993	0.6874	0.72908	0.772844	0.601554	0.719245	0.655334	0.642893	0.630479	0.535698	0.693415	0.659649	0.734494	0.614053	0.774807	0.246117	0.360654	0.607856	0.299142	0.363772	0.363086	0.263331	0.424671	0.39557	0.403891	0.531069	0.243855	0.597207	0.339448	0.40432	0.324949	0.410644	0.371063	0.382511	0.325392	0.409381	0.492457	0.489082	0.479328	0.309531
261.639	0.77489	0.862926	0.757547	0.651571	0.716709	0.79589	0.704818	0.753634	0.791678	0.697376	0.650703	0.692194	0.752608	0.5856	0.675393	0.637745	0.652344	0.630447	0.52633	0.715469	0.673593	0.721668	0.610532	0.764967	0.221983	0.35598	0.616459	0.287699	0.328157	0.354488	0.264974	0.466471	0.39388	0.410259	0.498575	0.231408	0.561182	0.327051	0.392092	0.351696	0.41338	0.371523	0.377444	0.317837	0.380663	0.459696	0.499673	0.488451	0.305876
262.639	0.775124	0.828591	0.732538	0.606905	0.69959	0.791213	0.693473	0.742917	0.78107	0.720655	0.687576	0.749094	0.7793	0.600818	0.702367	0.650617	0.653226	0.620309	0.54779	0.722274	0.70933	0.743728	0.64007	0.790253	0.244774	0.364198	0.608131	0.291447	0.37572	0.372041	0.277624	0.475045	0.383557	0.367692	0.487024	0.234735	0.575616	0.341741	0.385285	0.289869	0.422904	0.357816	0.389563	0.326628	0.396868	0.47191	0.497832	0.486716	0.299496
263.639	0.748202	0.818004	0.702118	0.62117	0.709362	0.766228	0.677194	0.736102	0.795131	0.707999	0.66775	0.734445	0.786134	0.614956	0.712995	0.650448	0.650091	0.628975	0.548747	0.707935	0.697267	0.712049	0.61516	0.779148	0.237591	0.376558	0.617087	0.287126	0.358425	0.364127	0.273068	0.450587	0.401966	0.382016	0.527071	0.233002	0.561646	0.369391	0.402593	0.332352	0.405291	0.375326	0.374537	0.320803	0.388187	0.464488	0.500676	0.472023	0.307815
264.638	0.724194	0.820845	0.735235	0.614815	0.697011	0.772947	0.67595	0.733848	0.802116	0.716546	0.673662	0.731714	0.808841	0.608439	0.710463	0.653187	0.673844	0.624625	0.54647	0.731639	0.69894	0.741209	0.630866	0.789295	0.2349	0.370471	0.620998	0.289761	0.36633	0.34977	0.262039	0.473707	0.374421	0.375478	0.497963	0.218812	0.554613	0.345274	0.367755	0.306717	0.411647	0.362419	0.386449	0.322472	0.399535	0.476138	0.484201	0.465564	0.322064
265.639	0.739713	0.830512	0.724218	0.632654	0.713051	0.798768	0.682186	0.737295	0.785212	0.715858	0.675154	0.733266	0.816288	0.614522	0.712528	0.644259	0.652004	0.668345	0.543227	0.728586	0.704204	0.742705	0.659012	0.770871	0.246915	0.382381	0.616499	0.29811	0.382669	0.371602	0.268289	0.483831	0.417455	0.40752	0.527687	0.24637	0.590479	0.358956	0.419621	0.326775	0.404168	0.371948	0.387822	0.332763	0.41207	0.480333	0.499642	0.471116	0.321424
266.639	0.7373	0.852332	0.787731	0.683431	0.710336	0.815136	0.710525	0.785887	0.791206	0.711648	0.650194	0.724021	0.803528	0.631436	0.699641	0.642511	0.644348	0.669359	0.540757	0.716632	0.714102	0.758098	0.613462	0.750535	0.245814	0.377261	0.615454	0.287231	0.380241	0.367482	0.266922	0.455847	0.417267	0.398702	0.530115	0.23812	0.578545	0.374963	0.424407	0.301276	0.413824	0.37988	0.391444	0.336758	0.419146	0.480711	0.491096	0.485029	0.318049
267.639	0.733384	0.862181	0.750443	0.618911	0.706228	0.773038	0.683782	0.757126	0.796582	0.7017	0.651082	0.696343	0.77916	0.604635	0.707119	0.654703	0.656283	0.664282	0.530031	0.713575	0.703398	0.722793	0.622601	0.750134	0.230778	0.335692	0.612274	0.29946	0.351916	0.363543	0.258028	0.466066	0.423794	0.418151	0.533968	0.27628	0.597756	0.383425	0.412564	0.310211	0.415495	0.377839	0.377751	0.317087	0.395906	0.483998	0.476225	0.467595	0.310672
268.639	0.761858	0.879598	0.762035	0.644365	0.738539	0.816535	0.705622	0.752474	0.783851	0.64761	0.660149	0.694109	0.759765	0.596763	0.672007	0.630978	0.653352	0.679461	0.558947	0.703297	0.694521	0.746737	0.621637	0.780056	0.241828	0.35295	0.607896	0.294897	0.343395	0.368099	0.266267	0.48467	0.393014	0.371969	0.496332	0.2806	0.574544	0.359334	0.406017	0.317205	0.411771	0.376619	0.392569	0.327273	0.418481	0.473061	0.487577	0.491352	0.316242
269.638	0.744815	0.870835	0.740553	0.659217	0.725138	0.754332	0.725733	0.772704	0.820544	0.702002	0.659359	0.729142	0.786222	0.620046	0.698037	0.637013	0.66195	0.676863	0.536758	0.699275	0.712943	0.736709	0.619208	0.776648	0.238405	0.355165	0.621719	0.294516	0.369087	0.35607	0.268634	0.460778	0.421679	0.383258	0.512649	0.26455	0.557432	0.35297	0.397559	0.334583	0.406627	0.372904	0.381786	0.317101	0.402925	0.468576	0.491845	0.457798	0.317325
270.639	0.738982	0.837462	0.73342	0.605048	0.705113	0.794727	0.743369	0.743469	0.80781	0.707214	0.647825	0.740673	0.768342	0.62888	0.685284	0.630611	0.67446	0.650311	0.553829	0.745534	0.704789	0.737175	0.648839	0.778434	0.240883	0.35977	0.608499	0.287469	0.375171	0.365077	0.266557	0.482644	0.424067	0.388139	0.517224	0.285781	0.590411	0.353661	0.393623	0.340016	0.401977	0.370745	0.38511	0.324696	0.413411	0.470993	0.521581	0.477097	0.319389
271.639	0.710482	0.848671	0.748221	0.639568	0.721292	0.793328	0.696057	0.744356	0.784467	0.715609	0.646345	0.738087	0.776506	0.603511	0.672205	0.634477	0.647117	0.652	0.549411	0.716403	0.714395	0.750502	0.623833	0.768554	0.243022	0.381864	0.612182	0.289026	0.386577	0.367153	0.2609	0.503351	0.404309	0.37981	0.512917	0.255799	0.597939	0.381505	0.409713	0.320118	0.412383	0.3757	0.377288	0.312579	0.425144	0.464293	0.48574	0.46708	0.322892
272.639	0.722194	0.847939	0.766049	0.640062	0.682304	0.783451	0.710936	0.744348	0.793113	0.683443	0.672864	0.744359	0.81652	0.60289	0.699461	0.644354	0.680453	0.693733	0.54909	0.706611	0.727317	0.75094	0.649058	0.772775	0.230167	0.365085	0.600952	0.289593	0.3564	0.351071	0.254595	0.458631	0.402531	0.381722	0.518927	0.255474	0.554189	0.340891	0.391253	0.314005	0.415252	0.383954	0.378014	0.335852	0.424036	0.489901	0.501857	0.487993	0.317605
273.639	0.724023	0.852152	0.722937	0.676291	0.708782	0.806032	0.713519	0.767565	0.783739	0.681652	0.676733	0.711119	0.787599	0.603639	0.673788	0.636854	0.644152	0.670411	0.576281	0.725557	0.735502	0.751677	0.636386	0.777077	0.246439	0.361795	0.612523	0.293002	0.375387	0.357558	0.259742	0.448495	0.413627	0.406902	0.507652	0.266262	0.56322	0.364477	0.390785	0.333998	0.421131	0.373432	0.370395	0.313626	0.40432	0.46393	0.501192	0.474462	0.32417
274.638	0.689635	0.832682	0.703205	0.61713	0.686281	0.797361	0.672807	0.739122	0.785438	0.670536	0.686748	0.681565	0.781121	0.614051	0.666466	0.616411	0.622717	0.649106	0.541491	0.687394	0.697648	0.724513	0.626177	0.745541	0.234085	0.339219	0.617359	0.28798	0.365439	0.342167	0.254204	0.454295	0.404278	0.404404	0.497602	0.262737	0.57934	0.354889	0.406198	0.321782	0.403539	0.372882	0.372059	0.308106	0.415719	0.483472	0.499153	0.469499	0.325991
275.639	0.722359	0.845698	0.721404	0.616965	0.708389	0.776549	0.685389	0.746481	0.795635	0.711228	0.652777	0.756404	0.78581	0.618649	0.701025	0.647519	0.647959	0.647806	0.543044	0.724084	0.708613	0.729517	0.633312	0.752276	0.25091	0.357744	0.614639	0.284477	0.360372	0.360476	0.269101	0.479916	0.418771	0.417083	0.500164	0.257162	0.580193	0.379871	0.430126	0.324039	0.409891	0.367844	0.377932	0.304835	0.422966	0.48569	0.513749	0.472998	0.314418
276.639	0.74022	0.883916	0.735838	0.638356	0.693114	0.775889	0.660545	0.75371	0.79916	0.695874	0.692636	0.726204	0.765938	0.630264	0.695806	0.667106	0.687249	0.642655	0.556421	0.70424	0.724882	0.738519	0.649488	0.777134	0.246079	0.353161	0.610387	0.288489	0.372567	0.353757	0.273622	0.462231	0.418757	0.362805	0.506152	0.240117	0.578065	0.367637	0.414865	0.303077	0.393675	0.368805	0.374984	0.315301	0.422953	0.470443	0.501857	0.468441	0.32052
277.639	0.730354	0.843328	0.731535	0.646889	0.710885	0.781499	0.689206	0.741653	0.792121	0.670744	0.65509	0.689224	0.768696	0.607839	0.673738	0.631205	0.674952	0.610138	0.536327	0.674786	0.68955	0.727919	0.626299	0.744395	0.241776	0.354997	0.617562	0.290577	0.328477	0.364059	0.276425	0.504272	0.39934	0.380499	0.497484	0.255286	0.578177	0.360588	0.388264	0.315485	0.415156	0.386333	0.377732	0.312319	0.407655	0.471901	0.478951	0.482037	0.320943
278.639	0.751817	0.873039	0.756776	0.677299	0.735623	0.841162	0.679576	0.782301	0.801494	0.726761	0.681988	0.720891	0.788068	0.606964	0.705066	0.653984	0.637067	0.633634	0.530696	0.70408	0.683142	0.72897	0.64511	0.759523	0.243452	0.372886	0.610994	0.288508	0.355729	0.353101	0.278133	0.467344	0.400686	0.382094	0.507213	0.269768	0.576544	0.359119	0.392153	0.322789	0.410964	0.37698	0.374469	0.313064	0.434265	0.470143	0.489698	0.473704	0.322094
279.638	0.721695	0.812397	0.72495	0.624789	0.672754	0.755698	0.669379	0.711443	0.812607	0.693781	0.683879	0.713405	0.765245	0.666913	0.70075	0.663957	0.630774	0.635878	0.527076	0.689593	0.685212	0.748145	0.633645	0.741551	0.250976	0.40236	0.619556	0.285805	0.399849	0.358059	0.267162	0.492263	0.390073	0.372387	0.512611	0.241191	0.565508	0.368943	0.378808	0.324092	0.39819	0.373365	0.372686	0.335807	0.405234	0.465451	0.492396	0.463834	0.32016
280.639	0.713477	0.834144	0.739886	0.665744	0.67709	0.784939	0.661137	0.723652	0.793119	0.666836	0.653379	0.693194	0.7694	0.639881	0.681984	0.648053	0.659764	0.656571	0.540268	0.704575	0.694476	0.722192	0.656425	0.731824	0.251999	0.364845	0.627057	0.287597	0.377714	0.369256	0.292029	0.475788	0.417676	0.39972	0.52433	0.23384	0.590756	0.350592	0.409101	0.323994	0.390863	0.396885	0.380982	0.3037	0.443269	0.482136	0.489777	0.48249	0.312168
281.639	0.710431	0.831281	0.732399	0.639791	0.720223	0.795284	0.688025	0.778609	0.782467	0.657833	0.667903	0.676475	0.747997	0.637287	0.664168	0.635799	0.629209	0.615593	0.528456	0.667281	0.68066	0.727725	0.631364	0.737819	0.246006	0.367534	0.62329	0.282922	0.390481	0.368808	0.281884	0.476155	0.38458	0.385192	0.494272	0.279216	0.573407	0.36666	0.39911	0.303076	0.397822	0.383546	0.377423	0.309293	0.431947	0.481038	0.498668	0.469081	0.316235
282.639	0.717285	0.826869	0.738002	0.652988	0.710672	0.792726	0.665503	0.730757	0.804772	0.670962	0.644531	0.675741	0.767548	0.621916	0.663481	0.642378	0.640625	0.642653	0.549444	0.666388	0.695769	0.734298	0.634127	0.75394	0.235463	0.359964	0.617043	0.291226	0.372598	0.362626	0.272438	0.45539	0.418782	0.401981	0.529689	0.282638	0.580556	0.345022	0.395661	0.320318	0.395915	0.383337	0.382656	0.322227	0.432224	0.47287	0.500603	0.478227	0.325203
283.639	0.714535	0.86793	0.728993	0.665639	0.699023	0.775159	0.677838	0.742536	0.807137	0.661698	0.673454	0.70274	0.764835	0.619912	0.687976	0.634816	0.647258	0.603551	0.547525	0.711687	0.700512	0.702844	0.63566	0.71526	0.236661	0.365279	0.625995	0.296614	0.353134	0.372943	0.278307	0.460015	0.406062	0.367895	0.511919	0.227972	0.549845	0.335982	0.393648	0.31072	0.423068	0.381681	0.391353	0.326781	0.42299	0.476789	0.516861	0.480571	0.329886
284.638	0.700161	0.838569	0.683125	0.619786	0.656239	0.779887	0.675996	0.728746	0.802679	0.658569	0.632432	0.687604	0.769098	0.604955	0.674004	0.635413	0.65965	0.611774	0.521431	0.674322	0.692646	0.717402	0.632821	0.730874	0.24674	0.361484	0.622916	0.293134	0.341488	0.354911	0.269998	0.476557	0.409191	0.390727	0.50785	0.274919	0.57272	0.363384	0.429175	0.335186	0.408726	0.378197	0.37928	0.318586	0.431253	0.471413	0.503226	0.490804	0.3324
285.639	0.743585	0.824817	0.753209	0.626398	0.691889	0.78581	0.67352	0.751337	0.797811	0.65636	0.673406	0.693611	0.782634	0.617577	0.675727	0.642681	0.643796	0.611868	0.512052	0.65478	0.676616	0.719523	0.635674	0.71938	0.238195	0.359169	0.619373	0.294297	0.334917	0.370966	0.268753	0.462939	0.397233	0.369988	0.513925	0.251377	0.546033	0.333221	0.367854	0.28698	0.41929	0.385796	0.386035	0.315418	0.425426	0.487682	0.52441	0.49326	0.324468
286.639	0.695013	0.847601	0.712561	0.617369	0.702436	0.786065	0.668474	0.74551	0.795232	0.686808	0.660059	0.705105	0.783424	0.595023	0.678327	0.635045	0.674871	0.605727	0.520813	0.669726	0.692316	0.734742	0.636573	0.707387	0.245566	0.342236	0.616565	0.296723	0.381034	0.370012	0.271919	0.462017	0.395506	0.373704	0.500085	0.222422	0.56583	0.342313	0.380394	0.306664	0.407724	0.380344	0.380638	0.320736	0.41412	0.480951	0.506128	0.486191	0.317094
287.639	0.727703	0.850527	0.750021	0.660261	0.682211	0.812522	0.688076	0.764772	0.805078	0.68808	0.660914	0.691318	0.7884	0.607725	0.676166	0.645282	0.643944	0.628372	0.537827	0.696043	0.688715	0.692764	0.608508	0.705926	0.244738	0.362413	0.653569	0.293239	0.354818	0.373007	0.287675	0.496684	0.390484	0.388192	0.510097	0.262795	0.549926	0.338764	0.386271	0.319131	0.407193	0.378676	0.373593	0.31522	0.44536	0.490559	0.505846	0.480845	0.319583
288.639	0.710612	0.84219	0.743195	0.626796	0.710053	0.784725	0.676054	0.772436	0.755425	0.643675	0.636206	0.652358	0.738512	0.569261	0.654675	0.623933	0.682717	0.580076	0.528013	0.663855	0.703384	0.732501	0.620571	0.691616	0.223658	0.369337	0.629767	0.283898	0.361697	0.35664	0.262407	0.487032	0.392241	0.381774	0.53576	0.238937	0.579106	0.358932	0.381308	0.300901	0.412085	0.373957	0.38172	0.316093	0.422908	0.481499	0.519363	0.480742	0.333263
289.638	0.653927	0.869505	0.729688	0.627093	0.708292	0.78027	0.676477	0.746113	0.790899	0.672798	0.647808	0.665036	0.755888	0.616691	0.672139	0.63176	0.657345	0.615188	0.541634	0.675371	0.697205	0.733235	0.626557	0.692822	0.239772	0.362687	0.632376	0.294203	0.408343	0.364486	0.275833	0.489247	0.416432	0.392825	0.499511	0.26265	0.554034	0.371798	0.398234	0.288285	0.415126	0.390698	0.382325	0.312149	0.433247	0.49849	0.507127	0.475052	0.316424
290.639	0.737048	0.845703	0.766009	0.660872	0.716967	0.795827	0.685904	0.77985	0.784893	0.649771	0.665915	0.680214	0.749159	0.58557	0.65815	0.632318	0.655411	0.610388	0.543941	0.694944	0.694732	0.727239	0.621206	0.735903	0.239178	0.379813	0.624175	0.297647	0.351987	0.3589	0.279545	0.50087	0.397969	0.380416	0.531958	0.265433	0.569075	0.345693	0.373286	0.331401	0.402663	0.38646	0.373595	0.310769	0.411177	0.476646	0.501654	0.478453	0.340934
291.639	0.707125	0.850666	0.742106	0.666367	0.700862	0.773303	0.689893	0.777161	0.807277	0.673141	0.674782	0.705545	0.768588	0.616375	0.668849	0.630204	0.655346	0.614648	0.543986	0.698299	0.695049	0.734076	0.621201	0.7314	0.240189	0.369378	0.637113	0.288427	0.388828	0.372623	0.288418	0.504723	0.421713	0.387047	0.562492	0.225951	0.555051	0.356457	0.359226	0.291365	0.417896	0.378597	0.375314	0.315418	0.423523	0.479499	0.499977	0.474579	0.321498
292.639	0.714724	0.862737	0.752153	0.636035	0.735246	0.830168	0.715802	0.784429	0.770239	0.639704	0.626817	0.649365	0.750284	0.564837	0.66374	0.602925	0.64374	0.617504	0.539235	0.681774	0.73709	0.722531	0.643308	0.708231	0.248956	0.380694	0.618952	0.289947	0.340942	0.363359	0.27326	0.497951	0.397986	0.375656	0.527199	0.24362	0.568233	0.34829	0.389794	0.338731	0.409642	0.3877	0.389521	0.329266	0.442313	0.492289	0.518579	0.492123	0.331826
293.639	0.708065	0.876598	0.746765	0.629813	0.738871	0.769371	0.703858	0.777386	0.795212	0.642151	0.651674	0.673282	0.76695	0.598369	0.669038	0.604197	0.638565	0.619808	0.534059	0.704211	0.706218	0.736118	0.634181	0.718815	0.240647	0.387665	0.636808	0.290932	0.373037	0.359322	0.275933	0.500344	0.39251	0.376723	0.525672	0.239293	0.572013	0.34095	0.396464	0.322411	0.412146	0.392378	0.392533	0.333709	0.450153	0.484477	0.518137	0.496149	0.320413
294.639	0.725662	0.841715	0.743933	0.638395	0.713584	0.820658	0.694885	0.767717	0.748533	0.666038	0.660948	0.687966	0.7484	0.599044	0.657682	0.597155	0.682188	0.634517	0.544341	0.710813	0.7053	0.747689	0.641035	0.74682	0.233901	0.356708	0.628718	0.28962	0.366583	0.338225	0.275264	0.494209	0.410148	0.408328	0.532839	0.272614	0.606384	0.359598	0.396071	0.327305	0.410979	0.383298	0.387619	0.305619	0.435319	0.491431	0.51762	0.496845	0.318355
295.639	0.750823	0.844744	0.736675	0.66175	0.718536	0.822884	0.703187	0.777272	0.757237	0.680084	0.660277	0.68576	0.769075	0.631682	0.680157	0.609796	0.631762	0.578967	0.538604	0.708442	0.688883	0.702191	0.640429	0.695467	0.244474	0.400856	0.627551	0.296015	0.342754	0.356906	0.288547	0.495101	0.411417	0.351353	0.490055	0.256416	0.553	0.330379	0.381295	0.305445	0.427267	0.385541	0.383216	0.343398	0.458169	0.49248	0.527804	0.485612	0.328117
296.639	0.729702	0.853606	0.754623	0.650749	0.69067	0.817837	0.687487	0.791283	0.817649	0.684993	0.684548	0.738342	0.808222	0.624626	0.686714	0.619645	0.668026	0.630896	0.533367	0.701025	0.69698	0.725306	0.635694	0.732564	0.248664	0.382172	0.62409	0.289373	0.351628	0.360405	0.265276	0.493774	0.408513	0.38729	0.504037	0.225999	0.563719	0.3304	0.388461	0.312042	0.415512	0.384869	0.384136	0.320692	0.424732	0.494089	0.492862	0.482528	0.328476
297.639	0.712601	0.847922	0.716447	0.659713	0.714299	0.784781	0.707162	0.761325	0.827032	0.687779	0.64099	0.690863	0.790756	0.600772	0.685194	0.620203	0.655252	0.612559	0.531127	0.678749	0.686998	0.683337	0.634818	0.702764	0.248967	0.355211	0.629723	0.297781	0.419507	0.352182	0.279619	0.520746	0.393511	0.377727	0.508922	0.238632	0.566251	0.344442	0.3803	0.31468	0.414389	0.387594	0.381236	0.346386	0.413742	0.489722	0.491509	0.50147	0.316855
298.639	0.760149	0.848043	0.753619	0.658779	0.724077	0.816986	0.721341	0.778323	0.789583	0.706498	0.67202	0.735468	0.782041	0.630228	0.684168	0.631489	0.662877	0.612072	0.52565	0.689662	0.699272	0.713344	0.624362	0.706245	0.242104	0.37489	0.639977	0.288996	0.391911	0.360808	0.277529	0.507314	0.388443	0.34879	0.48582	0.262599	0.569585	0.340479	0.380431	0.305626	0.402703	0.375314	0.375744	0.309818	0.428566	0.492461	0.47577	0.487272	0.324551
299.639	0.716784	0.828782	0.731531	0.651348	0.719199	0.794005	0.705159	0.767525	0.801557	0.697243	0.668736	0.697182	0.775828	0.635548	0.666941	0.600852	0.653618	0.617376	0.526547	0.69516	0.677055	0.712496	0.623135	0.717194	0.238515	0.373291	0.632189	0.293173	0.356218	0.354966	0.269501	0.506957	0.411506	0.355491	0.511295	0.228382	0.572338	0.34613	0.397188	0.299267	0.417774	0.373207	0.370522	0.311289	0.43367	0.480637	0.499317	0.480259	0.310785
300.639	0.703764	0.877943	0.743	0.696647	0.717409	0.806447	0.728659	0.746245	0.795365	0.661081	0.641756	0.702563	0.762543	0.606712	0.66506	0.604085	0.672008	0.630111	0.527187	0.700238	0.669631	0.743354	0.642449	0.724142	0.242818	0.370994	0.633153	0.303881	0.36003	0.351444	0.280604	0.487255	0.408999	0.367624	0.496408	0.215836	0.534184	0.333952	0.382797	0.301521	0.433333	0.384687	0.389677	0.328257	0.440931	0.525812	0.52077	0.499833	0.312415
301.639	0.735988	0.876889	0.743471	0.659347	0.730444	0.791339	0.686247	0.74906	0.811205	0.682568	0.676033	0.707448	0.777014	0.606515	0.675744	0.612451	0.60756	0.618551	0.54418	0.69222	0.688123	0.723849	0.640878	0.746641	0.255377	0.366292	0.649295	0.296766	0.377899	0.356903	0.291699	0.500581	0.41432	0.359022	0.519005	0.268656	0.552522	0.328708	0.38137	0.306902	0.44273	0.40115	0.387403	0.334705	0.448303	0.504145	0.520226	0.492062	0.324792
302.639	0.742771	0.84744	0.740817	0.644058	0.712255	0.797665	0.690917	0.733012	0.781092	0.671166	0.662545	0.670459	0.753565	0.57017	0.65347	0.601402	0.677248	0.6271	0.546888	0.703108	0.697766	0.731998	0.636946	0.756144	0.248062	0.379696	0.630071	0.288739	0.392003	0.34847	0.289179	0.491893	0.396643	0.348833	0.481407	0.238207	0.541495	0.350866	0.38769	0.303753	0.441447	0.402092	0.383412	0.336938	0.452067	0.518543	0.520613	0.515919	0.322761
303.639	0.832702	0.89039	0.791298	0.665615	0.707858	0.82629	0.722377	0.782678	0.786432	0.690373	0.639227	0.704707	0.765339	0.589436	0.656489	0.615869	0.687184	0.621797	0.536833	0.699947	0.681233	0.739176	0.647372	0.733099	0.246613	0.37717	0.652652	0.297513	0.337795	0.359511	0.294458	0.497098	0.397703	0.374834	0.509086	0.205613	0.542596	0.347299	0.392503	0.320463	0.428731	0.395432	0.388372	0.314542	0.456619	0.517218	0.514168	0.524183	0.299035
304.639	0.793745	0.867062	0.768605	0.667015	0.730708	0.812797	0.749561	0.785651	0.774202	0.674659	0.648706	0.651045	0.784251	0.564912	0.661371	0.611817	0.65731	0.646223	0.521226	0.700124	0.690012	0.7291	0.606977	0.710603	0.250144	0.381396	0.652786	0.29462	0.351531	0.339614	0.294893	0.499702	0.405874	0.370848	0.506435	0.22965	0.531726	0.330514	0.376407	0.287858	0.426131	0.389674	0.400458	0.334037	0.447777	0.512699	0.509022	0.505781	0.316113
305.639	0.761958	0.857205	0.749999	0.650439	0.73673	0.793767	0.699646	0.777851	0.813878	0.702008	0.645347	0.698235	0.783066	0.592994	0.686785	0.623445	0.677827	0.620771	0.507194	0.635066	0.676838	0.704949	0.609156	0.731112	0.245939	0.368246	0.651261	0.293384	0.320768	0.349946	0.284668	0.522592	0.402503	0.369058	0.492914	0.225166	0.57028	0.344692	0.388986	0.3065	0.420275	0.378271	0.389729	0.322871	0.440642	0.495552	0.50258	0.511645	0.32643
306.639	0.744957	0.875999	0.75575	0.657846	0.713398	0.7833	0.69478	0.762496	0.786873	0.667718	0.621725	0.677825	0.787675	0.583538	0.67019	0.630479	0.664262	0.631734	0.537913	0.712765	0.681556	0.762687	0.642064	0.742284	0.249691	0.370185	0.64986	0.29562	0.388502	0.359931	0.28676	0.482099	0.401871	0.366149	0.500858	0.256959	0.566653	0.368008	0.391493	0.302561	0.408917	0.388052	0.386746	0.317173	0.429855	0.509086	0.510503	0.51092	0.315372
307.638	0.757393	0.906822	0.748522	0.642674	0.720011	0.765737	0.721774	0.776434	0.783817	0.696021	0.633706	0.679324	0.769954	0.590436	0.660204	0.619262	0.658254	0.659591	0.545762	0.699251	0.679848	0.740785	0.645696	0.738008	0.242067	0.350096	0.64381	0.301475	0.347308	0.352256	0.274531	0.492465	0.421748	0.375258	0.534148	0.243805	0.584834	0.343094	0.38113	0.303467	0.446467	0.385283	0.385551	0.328775	0.445866	0.495027	0.536454	0.501006	0.320183
308.639	0.780533	0.905884	0.771181	0.692917	0.747411	0.809261	0.757785	0.799666	0.816339	0.704597	0.66136	0.700143	0.822685	0.605763	0.702523	0.632142	0.659775	0.635386	0.52896	0.720172	0.662315	0.727743	0.624576	0.703568	0.247561	0.383436	0.65575	0.296746	0.389729	0.36148	0.28099	0.501328	0.411923	0.377872	0.516239	0.255404	0.545224	0.339942	0.391817	0.312374	0.432255	0.375847	0.386508	0.3265	0.43452	0.4982	0.523002	0.508569	0.325525
309.639	0.729	0.873361	0.787529	0.676846	0.741539	0.787672	0.72947	0.81139	0.774973	0.687206	0.643205	0.702272	0.779601	0.585549	0.679495	0.618124	0.641215	0.612923	0.53254	0.700323	0.65942	0.713911	0.62667	0.697876	0.244536	0.378786	0.652943	0.29509	0.379183	0.343102	0.275941	0.47899	0.397392	0.36535	0.491491	0.243018	0.548725	0.327388	0.402893	0.301804	0.419378	0.374123	0.392371	0.31652	0.435598	0.504695	0.510786	0.508222	0.322891
310.639	0.747301	0.867101	0.713436	0.652535	0.733946	0.76355	0.699972	0.775873	0.773207	0.670453	0.663572	0.691584	0.798431	0.577814	0.678367	0.609631	0.629067	0.627286	0.515435	0.681578	0.632097	0.733471	0.63689	0.721551	0.250643	0.37443	0.634475	0.301124	0.367151	0.348869	0.289258	0.499284	0.395082	0.381513	0.508375	0.217014	0.537316	0.321766	0.363873	0.307839	0.418109	0.378801	0.386365	0.324374	0.455167	0.502642	0.513878	0.501755	0.323123
311.639	0.734756	0.844684	0.746458	0.638073	0.713649	0.755267	0.710243	0.756899	0.784657	0.653614	0.608576	0.674291	0.776136	0.592587	0.68904	0.626892	0.652057	0.647528	0.527725	0.719874	0.639485	0.741393	0.634112	0.707832	0.239633	0.378654	0.642524	0.289992	0.374091	0.350685	0.289631	0.490557	0.391418	0.379141	0.481386	0.222334	0.505258	0.353025	0.376999	0.331891	0.432355	0.388412	0.389074	0.346009	0.45922	0.519328	0.522814	0.512892	0.315952
312.638	0.781366	0.875358	0.757066	0.686053	0.724545	0.796803	0.691252	0.776447	0.794259	0.674091	0.656176	0.651625	0.753515	0.578509	0.686665	0.616348	0.673431	0.61544	0.520567	0.678227	0.644309	0.70556	0.614334	0.696466	0.233002	0.366734	0.630601	0.298009	0.377421	0.342929	0.278137	0.480675	0.420734	0.380857	0.512967	0.206132	0.540086	0.342497	0.366879	0.299826	0.422675	0.382784	0.383329	0.322733	0.456161	0.497811	0.526917	0.497812	0.32142
313.639	0.735758	0.850327	0.748795	0.640922	0.718626	0.778708	0.676395	0.776217	0.766883	0.661444	0.641044	0.64581	0.771898	0.600834	0.65963	0.611837	0.653037	0.606666	0.527378	0.689561	0.656807	0.73017	0.631924	0.703239	0.241454	0.372629	0.658594	0.299452	0.354906	0.358276	0.288596	0.511027	0.390837	0.350364	0.474228	0.221419	0.538421	0.355521	0.378786	0.322545	0.433649	0.374897	0.390186	0.335504	0.443766	0.51434	0.533898	0.508549	0.314029
314.639	0.803045	0.91581	0.786203	0.68819	0.772518	0.83639	0.685091	0.832524	0.765215	0.651731	0.654197	0.67637	0.750526	0.562278	0.668787	0.595874	0.626894	0.603752	0.526872	0.675167	0.650525	0.710577	0.630032	0.708335	0.238836	0.370656	0.632184	0.296425	0.406239	0.351543	0.289833	0.492467	0.406803	0.353746	0.484112	0.215397	0.514239	0.347442	0.385542	0.292598	0.410328	0.380187	0.381268	0.322977	0.44374	0.490843	0.533609	0.489893	0.312299
315.639	0.74027	0.885922	0.751052	0.635405	0.705703	0.801236	0.70859	0.776147	0.815882	0.626121	0.620901	0.637014	0.755168	0.579769	0.679244	0.593893	0.637108	0.632251	0.536291	0.690678	0.643687	0.69533	0.64996	0.71398	0.230489	0.380545	0.652364	0.29169	0.398714	0.354106	0.291746	0.510113	0.403628	0.353861	0.487361	0.229017	0.539306	0.351099	0.380403	0.325216	0.427661	0.384117	0.389329	0.336933	0.450295	0.499151	0.521165	0.491904	0.322745
316.639	0.746485	0.843612	0.744463	0.639966	0.728913	0.812449	0.689812	0.744751	0.81487	0.687213	0.635571	0.670261	0.761069	0.58761	0.692369	0.626117	0.652018	0.657565	0.545289	0.666711	0.649862	0.737344	0.63286	0.710552	0.238734	0.358041	0.666598	0.293782	0.36232	0.35904	0.281261	0.479772	0.392748	0.362597	0.460166	0.20712	0.524073	0.327829	0.36872	0.291624	0.430883	0.387156	0.386051	0.328966	0.453823	0.5116	0.550924	0.504805	0.320073
317.638	0.76183	0.845403	0.739311	0.68272	0.725822	0.799301	0.686202	0.769428	0.843506	0.681614	0.627191	0.695668	0.765233	0.573051	0.703573	0.626753	0.654551	0.647225	0.541131	0.694246	0.664913	0.729266	0.654269	0.751116	0.22378	0.37002	0.646477	0.294246	0.364496	0.34325	0.288055	0.4853	0.404339	0.358434	0.487188	0.211643	0.57808	0.357965	0.40379	0.306959	0.426117	0.380851	0.396158	0.326004	0.467544	0.504147	0.519357	0.505377	0.315306
318.639	0.783722	0.873289	0.769766	0.657667	0.71671	0.804579	0.68348	0.739283	0.812237	0.643045	0.640751	0.686737	0.742606	0.578959	0.688189	0.613691	0.654592	0.639336	0.533069	0.708136	0.632897	0.735371	0.636153	0.698858	0.244272	0.388155	0.66878	0.312204	0.385112	0.361916	0.292359	0.466478	0.416602	0.364566	0.492852	0.240094	0.5632	0.364103	0.392711	0.292457	0.440832	0.389188	0.392582	0.322221	0.45595	0.528035	0.526085	0.497492	0.32976
319.639	0.713222	0.8569	0.723286	0.648647	0.713228	0.821072	0.698851	0.763304	0.822326	0.681642	0.64678	0.667997	0.790336	0.546614	0.692808	0.625638	0.630788	0.612596	0.521795	0.684268	0.643111	0.700239	0.628346	0.706439	0.247988	0.379835	0.674388	0.311308	0.414103	0.363857	0.281052	0.527863	0.387986	0.371187	0.507897	0.229775	0.570066	0.343247	0.423692	0.316772	0.42634	0.377643	0.402308	0.323281	0.45104	0.501836	0.520582	0.492989	0.312424
320.639	0.743461	0.854992	0.732536	0.637427	0.724719	0.81452	0.68464	0.754833	0.826142	0.652611	0.64717	0.697993	0.751053	0.59095	0.693985	0.610228	0.642409	0.637586	0.547873	0.696298	0.665116	0.730843	0.63046	0.724628	0.25048	0.365307	0.671536	0.301408	0.401065	0.379477	0.294947	0.505655	0.392655	0.345105	0.479174	0.216857	0.551838	0.347178	0.417342	0.306626	0.430504	0.365816	0.378366	0.307775	0.457297	0.515145	0.520679	0.488009	0.322511
321.639	0.738533	0.841886	0.741818	0.620179	0.701913	0.801272	0.66285	0.748972	0.818859	0.663294	0.639896	0.674785	0.755854	0.602319	0.683147	0.618763	0.66315	0.633965	0.540207	0.726839	0.669714	0.715948	0.651006	0.718562	0.244004	0.392596	0.669711	0.302549	0.364015	0.353399	0.290397	0.541331	0.419021	0.336701	0.496281	0.24162	0.535	0.351268	0.403248	0.313246	0.426847	0.37655	0.387272	0.307622	0.460165	0.49392	0.53129	0.488239	0.317194
322.638	0.762039	0.86518	0.746415	0.663036	0.737997	0.828534	0.703964	0.748547	0.81224	0.656909	0.647185	0.67011	0.78175	0.562795	0.693887	0.631641	0.619192	0.638726	0.508206	0.679103	0.64509	0.699262	0.609336	0.702083	0.246701	0.40241	0.671452	0.303637	0.413225	0.378463	0.286857	0.533195	0.42074	0.384358	0.49283	0.199342	0.536734	0.33875	0.377952	0.297851	0.421072	0.384897	0.398344	0.321975	0.469829	0.522926	0.538904	0.494882	0.329819
323.639	0.730993	0.85172	0.74306	0.652741	0.716499	0.814905	0.68652	0.772449	0.800201	0.693647	0.656777	0.71108	0.790247	0.617284	0.690277	0.615624	0.605156	0.608613	0.542987	0.692315	0.65938	0.698681	0.612049	0.689315	0.232565	0.364773	0.655355	0.291395	0.344161	0.356374	0.291243	0.519988	0.422062	0.374801	0.481956	0.239655	0.546969	0.357749	0.423478	0.30879	0.435189	0.377509	0.386144	0.333346	0.457836	0.520694	0.536281	0.482692	0.322658
324.639	0.74569	0.875005	0.749466	0.666959	0.734827	0.824409	0.710789	0.795816	0.797245	0.684558	0.654132	0.714639	0.742029	0.626882	0.673969	0.59398	0.6524	0.627561	0.54068	0.709817	0.659956	0.725631	0.631505	0.689831	0.240821	0.374696	0.674878	0.293228	0.380839	0.360871	0.283349	0.507639	0.422114	0.344912	0.50837	0.25904	0.553923	0.356268	0.363199	0.32952	0.424774	0.387042	0.398283	0.331958	0.472507	0.536254	0.542338	0.507432	0.317697
325.639	0.769924	0.877706	0.756655	0.680211	0.724956	0.821722	0.715967	0.773393	0.799306	0.680817	0.666786	0.678103	0.747443	0.54048	0.678307	0.628282	0.615565	0.61731	0.520073	0.67578	0.622704	0.688004	0.604194	0.667989	0.24182	0.368575	0.652246	0.298756	0.34898	0.362767	0.284485	0.500377	0.400394	0.378116	0.489557	0.251765	0.534947	0.358679	0.397533	0.31735	0.445904	0.38973	0.395915	0.342885	0.467988	0.519667	0.552979	0.510126	0.31854
326.639	0.791877	0.880185	0.766625	0.661324	0.752968	0.817419	0.71673	0.768788	0.7756	0.666664	0.639305	0.669836	0.756129	0.586107	0.670043	0.602762	0.632498	0.632865	0.519353	0.692527	0.680307	0.699593	0.62692	0.675833	0.227124	0.399681	0.650486	0.297269	0.356129	0.345751	0.263609	0.482196	0.420463	0.367855	0.504702	0.19965	0.559338	0.350475	0.376813	0.326971	0.425956	0.377264	0.388429	0.31705	0.454434	0.503993	0.534632	0.489954	0.322765
327.639	0.735464	0.894365	0.751235	0.661198	0.699248	0.788236	0.714039	0.72997	0.791903	0.682057	0.627424	0.687614	0.764072	0.561909	0.682881	0.60648	0.640889	0.62898	0.535947	0.712428	0.671466	0.708289	0.626557	0.684368	0.234888	0.356902	0.673934	0.29792	0.384913	0.357942	0.284079	0.492607	0.419678	0.374585	0.48433	0.255487	0.550732	0.339929	0.415159	0.306713	0.429072	0.388661	0.39586	0.316399	0.469054	0.520884	0.532934	0.498217	0.313304
328.639	0.750109	0.878599	0.7501	0.65553	0.721381	0.803624	0.684476	0.773173	0.768773	0.637206	0.629482	0.680154	0.740941	0.555612	0.676019	0.592916	0.625157	0.621725	0.552641	0.726374	0.632948	0.74285	0.652317	0.716429	0.246535	0.391623	0.683864	0.303963	0.36746	0.354006	0.287819	0.515612	0.415872	0.346065	0.483884	0.226025	0.538319	0.362948	0.401433	0.303999	0.438781	0.394141	0.392437	0.32714	0.479199	0.510154	0.531223	0.508684	0.327731
329.639	0.734585	0.888637	0.751157	0.687894	0.70388	0.770843	0.720033	0.777146	0.795703	0.655125	0.639308	0.661767	0.746557	0.585679	0.691925	0.615762	0.655724	0.63246	0.549952	0.70758	0.663272	0.763809	0.663042	0.75101	0.237776	0.369658	0.690547	0.297529	0.379205	0.372851	0.285127	0.496014	0.412622	0.361331	0.485036	0.217488	0.517557	0.345965	0.402306	0.307502	0.435299	0.385296	0.388177	0.343477	0.457087	0.524684	0.537073	0.501	0.31807
330.639	0.760731	0.870528	0.73589	0.669731	0.72729	0.803678	0.740172	0.758705	0.806707	0.670725	0.670364	0.695063	0.748826	0.582188	0.675613	0.632223	0.642614	0.637279	0.532729	0.698973	0.648019	0.713756	0.647874	0.706372	0.248859	0.383845	0.66635	0.293786	0.34801	0.381983	0.294989	0.481978	0.403216	0.34689	0.506242	0.231916	0.544146	0.352877	0.3853	0.318506	0.439871	0.398439	0.399949	0.339418	0.45979	0.523616	0.533656	0.493314	0.318754
331.639	0.781188	0.853371	0.763334	0.673774	0.728384	0.822905	0.720009	0.777212	0.780208	0.683752	0.638105	0.65279	0.727027	0.579973	0.689353	0.6276	0.622789	0.618071	0.534893	0.712375	0.643178	0.73019	0.631379	0.714011	0.258931	0.377285	0.677731	0.304454	0.365023	0.371017	0.297662	0.471747	0.404449	0.353933	0.49863	0.221949	0.554759	0.36024	0.374622	0.298058	0.45143	0.389819	0.389323	0.330703	0.459734	0.521175	0.552891	0.502457	0.327902
332.639	0.747836	0.835104	0.745502	0.660061	0.720228	0.80618	0.697235	0.756906	0.776865	0.647007	0.64535	0.674641	0.73025	0.541246	0.683546	0.584544	0.627036	0.637686	0.542484	0.702661	0.672621	0.734224	0.613079	0.693775	0.247749	0.333599	0.683187	0.299778	0.363811	0.369779	0.291278	0.464849	0.422332	0.358369	0.490386	0.24873	0.53282	0.354707	0.360545	0.310055	0.434302	0.379628	0.39182	0.321249	0.472641	0.533677	0.559235	0.501702	0.327459
333.639	0.754631	0.900754	0.731435	0.673142	0.746391	0.779931	0.72657	0.792319	0.785475	0.657661	0.658238	0.652752	0.737911	0.580047	0.664601	0.598804	0.670461	0.630565	0.556682	0.701431	0.6809	0.710064	0.66452	0.729803	0.260059	0.37484	0.68266	0.310292	0.407654	0.373864	0.285857	0.519886	0.418934	0.374617	0.506377	0.250147	0.547347	0.364872	0.400184	0.30761	0.421559	0.377387	0.386919	0.320141	0.464267	0.51586	0.537879	0.502268	0.333453
334.639	0.750355	0.920104	0.743071	0.676854	0.742006	0.767011	0.71787	0.752598	0.782912	0.669551	0.621097	0.643301	0.737501	0.578489	0.674126	0.619162	0.675582	0.670507	0.562378	0.728446	0.703641	0.714016	0.660401	0.742729	0.242664	0.362641	0.679766	0.303875	0.362434	0.355798	0.294656	0.47602	0.400874	0.376714	0.485651	0.224102	0.52722	0.357664	0.361254	0.325722	0.41246	0.386109	0.390519	0.319223	0.470156	0.506967	0.525858	0.481173	0.316707
335.639	0.752571	0.867394	0.749344	0.69245	0.737775	0.809501	0.674654	0.77533	0.785738	0.670949	0.621764	0.652262	0.735751	0.562322	0.674407	0.597322	0.650993	0.659894	0.548806	0.701522	0.681589	0.732516	0.638547	0.710829	0.244769	0.377936	0.683302	0.305727	0.429807	0.382892	0.296164	0.498489	0.41441	0.358946	0.485598	0.232477	0.530718	0.346296	0.389161	0.31935	0.406664	0.3857	0.389333	0.322514	0.477798	0.507048	0.519151	0.490898	0.315765
336.639	0.745848	0.877716	0.741965	0.683077	0.724191	0.762654	0.702296	0.776525	0.816281	0.693094	0.683047	0.689499	0.773418	0.593279	0.682385	0.609548	0.63676	0.648284	0.547033	0.690655	0.666187	0.71878	0.627425	0.707559	0.242855	0.381082	0.671648	0.299661	0.42295	0.358312	0.288662	0.514853	0.419254	0.341577	0.481108	0.201015	0.536742	0.346863	0.386711	0.289586	0.407077	0.375784	0.378981	0.349227	0.465865	0.508035	0.504451	0.479906	0.313448
337.639	0.770086	0.876224	0.756099	0.666412	0.732547	0.790344	0.704511	0.77843	0.803526	0.683042	0.658238	0.699895	0.745376	0.596327	0.670254	0.628589	0.63988	0.625709	0.53943	0.702563	0.685396	0.724673	0.63375	0.718167	0.245147	0.382211	0.680418	0.305578	0.397132	0.366178	0.2904	0.521558	0.404011	0.375379	0.481349	0.217582	0.563564	0.360154	0.394402	0.321324	0.424739	0.389995	0.383533	0.330594	0.49406	0.526937	0.510411	0.491598	0.320488
338.639	0.787142	0.856738	0.744796	0.678686	0.688741	0.790578	0.67503	0.739058	0.787457	0.653515	0.638338	0.674263	0.728378	0.586562	0.63954	0.599632	0.663332	0.648454	0.53733	0.706248	0.674796	0.730096	0.642707	0.737869	0.231773	0.373304	0.677798	0.303793	0.381163	0.36396	0.284603	0.498056	0.430647	0.359083	0.486986	0.236272	0.536829	0.36346	0.404216	0.320738	0.437284	0.38696	0.37811	0.342318	0.478544	0.507985	0.542927	0.485982	0.313721
339.639	0.790045	0.89848	0.763024	0.68661	0.758329	0.775514	0.757039	0.808681	0.776768	0.663165	0.655577	0.668476	0.736778	0.600488	0.645161	0.607162	0.614724	0.62351	0.523644	0.706564	0.652067	0.691274	0.621298	0.71137	0.248038	0.348852	0.686832	0.310315	0.408067	0.38597	0.305476	0.510949	0.408152	0.345826	0.503274	0.220088	0.553704	0.373682	0.378985	0.319799	0.425227	0.389519	0.383685	0.323014	0.478412	0.505678	0.527314	0.499053	0.307755
340.639	0.754771	0.884243	0.757584	0.690175	0.734742	0.784409	0.717861	0.764013	0.802328	0.689235	0.641081	0.688575	0.723853	0.596183	0.64732	0.590211	0.669992	0.628256	0.522557	0.702049	0.661062	0.719792	0.651649	0.730889	0.249971	0.377424	0.685923	0.314017	0.398275	0.378277	0.295087	0.537266	0.4238	0.393069	0.510571	0.248522	0.554265	0.376118	0.378124	0.325174	0.4223	0.384806	0.382601	0.328437	0.487159	0.514079	0.540878	0.489961	0.306974
[truncated: 119 more columns]

## Sheet: Firuge4C
Time (min)	DMSO			Estradiol			Fulvestrant			Tamoxifen			GDC-0810			AZD9496			GCD-0927
	Rep1	Rep2	Rep3	Rep1	Rep2	Rep3	Rep1	Rep2	Rep3	Rep1	Rep2	Rep3	Rep1	Rep2	Rep3	Rep1	Rep2	Rep3	Rep1	Rep2	Rep3
0	-0.00122	0.00142	0.00214	0.00833	0.0012	0.00195	-0.00038	0	0.00416	0.00405	0.00022	0.00116	0.01414	-0.01672	0.00186	-0.01199	-0.00327	0.00069	-0.00405	0.00155	-0.00095
1.04167	-0.02609	0.00873	-0.01789	0.16103	0.19898	0.20758	0.05203	0.08917	0.07518	0.16238	0.13716	0.10769	0.0348	0.04013	0.02478	0.04157	0.03819	0.05173	0.11597	0.05961	0.08454
3.125	-0.02047	-0.00198	0.00332	0.38713	0.38809	0.3646	0.12389	0.23947	0.20449	0.27277	0.25296	0.22313	0.12576	0.12634	0.13759	0.18191	0.18208	0.217	0.23757	0.21245	0.24855
5.20833	-0.01907	-0.00062	-0.01774	0.48096	0.47357	0.48399	0.32948	0.31804	0.29739	0.30468	0.33638	0.29224	0.23662	0.20303	0.24938	0.26172	0.31041	0.31465	0.37693	0.32878	0.35316
7.29167	-0.02755	-0.01286	0.00116	0.48815	0.51445	0.49408	0.3707	0.39073	0.3711	0.31294	0.35201	0.31442	0.2718	0.26571	0.30316	0.32693	0.34954	0.35086	0.3685	0.40286	0.42279
9.375	0.00512	0.0027	-0.01214	0.52021	0.53462	0.49256	0.47061	0.45712	0.43675	0.35515	0.36453	0.33205	0.34025	0.31518	0.32458	0.34465	0.38867	0.38352	0.45771	0.42888	0.44952
11.4583	-0.04839	0.01092	-0.01875	0.51496	0.54464	0.50246	0.4639	0.4891	0.466	0.37711	0.38076	0.31694	0.36034	0.35047	0.35551	0.35934	0.40886	0.39949	0.461	0.4531	0.46344
13.5417	-0.00067	-0.00303	-0.00203	0.52474	0.53542	0.50329	0.50009	0.50155	0.48763	0.34018	0.38271	0.3264	0.35938	0.3568	0.3824	0.34821	0.4136	0.40183	0.48924	0.48621	0.48804
