# Supplementary material for: A high-throughput platform for single-molecule tracking identifies drug interaction and cellular mechanisms
Source: eLife. 2025 Jan 9;12:RP93183. doi: 10.7554/eLife.93183 (PMC11717362; doi:10.7554/eLife.93183)
Supplement: Figure 5—source data 4. [file elife-93183-fig5-data4.xlsx]

## Sheet: Figure5B
		11					13					15					12					16					14
	Concentration (µm)	rep1	rep2	rep3	rep4	rep5	rep1	rep2	rep3	rep4	rep5	rep1	rep2	rep3	rep4	rep5	rep1	rep2	rep3	rep4	rep5	rep1	rep2	rep3	rep4	rep5	rep1	rep2	rep3	rep4	rep5
DMSO	5e-07	0.001	0.0036	0	N/A	0	0.001	0.0036	0	0	N/A	0	-0.0038	-0.0049	-0.0059	0.0083	0	-0.0038	-0.0049	-0.0059	0.0083	0.001	0.0036	0	N/A	0	0	-0.0038	-0.0049	-0.0059	0.0083
	5.081e-06	0.1086		-0.0174	N/A	0.012	-0.0031	0.0294	-0.015	0.0122	N/A	0.0203	-0.002	-0.0214	0.0198	0.0098	0.0201	0.0018	-0.0103	0.0376	-0.0368	0.0081	0.0262	-0.027	N/A	0.027	-0.0221	-0.0257	-0.0117	-0.0024	0.0062
	1.5242e-05	0.0292	0.0039	0.0287	N/A	-0.006	0.0557	0.0568	0.0468	0.0197	N/A	0.0437	0.0239	-0.0146	0.0059	0.0213	0.1385	0.047	0.0002	0.0012	0.021	-0.0023	0.0215	-0.0376	N/A	-0.0001	0.0058	0.0011	0.033	-0.0093	0.0214
	4.5725e-05	0.0731	0.1751	0.1738	N/A	0.123	0.0634		0.0837	0.0777	N/A	0.0091	0.0746	-0.0005	-0.0063	-0.0188	0.1462	0.1297	0.0734	0.1164	0.1317	0.0386	0.0114	0.0045	N/A	-0.0118	0.0959	0.0691	0.068	0.0482	0.0823
	0.00013717	0.3215	0.2187	0.3182	N/A	0.3554	0.2028	0.0443	0.2694	0.2433	N/A	0.0995	0.1499	0.0474	0.0854	0.1376	0.3415	0.3365	0.2792	0.2072	0.3545	0.1647	0.1281	0.0973	N/A	0.0539	0.2395	0.2002	0.1582	0.1108	0.1262
	0.00041152	0.393	0.2732	0.3767	N/A	0.4163	0.3431	0.2418	0.3356	0.3526	N/A	0.2913	0.275	0.2108	0.2213	0.2685	0.4164	0.4527	0.3539	0.4495	0.4096	0.193	0.1589	0.1562	N/A	0.1692	0.3789	0.4062	0.301	0.2454	0.3484
	0.00123457	0.5141	0.4489	0.4837	N/A	0.5156	0.4081	0.3302	0.4515	0.3744	N/A	0.4247	0.4242	0.2935	0.3601	0.4327	0.538	0.5294	0.487	0.5039	0.5705	0.3761	0.3609	0.3658	N/A	0.3694	0.5183	0.4993	0.4384	0.4672	0.5281
	0.0037037	0.512	0.4722	0.479	N/A	0.565	0.4167	0.374	0.444	0.3723	N/A	0.4111	0.4187	0.3985	0.3756	0.431	0.5452	0.5324	0.488	0.5227	0.606	0.4493	0.3885	0.4279	N/A	0.4543	0.5526	0.5216	0.4784	0.4958	0.5491
	0.0111111	0.4875	0.4289	0.5019	N/A	0.5369	0.4362	0.4106	0.4397	0.4265	N/A	0.4522	0.4307	0.3967	0.4369	0.4598	0.5519	0.5196	0.4769	0.5359	0.5523	0.4697	0.4054	0.4782	N/A	0.4661	0.5367	0.4888	0.4643	0.4918	0.5835
	0.0333333	0.5087	0.4184	0.4854	N/A	0.544	0.4331	0.3387	0.4384	0.4174	N/A	0.4532	0.4193	0.4154	0.414	0.4666	0.5502	0.5253	0.4797	0.5262	0.5698	0.4818	0.4657	0.4525	N/A	0.4962	0.5495	0.5169	0.4514	0.5371	0.5776

## Sheet: Figure 5C
SMT EC50	MCF7 viability	T47D viability
0.00044239	0.002507	0.001919
0.0049754	0.03583	0.06829
0.00028147	0.00203	0.003996
7.2041e-05	0.000157	5.73e-05
0.00025946	0.001062	0.000281
0.000106	0.000524	0.000144
0.00011286	0.003632	0.001666
0.00017688	0.00028	0.000147
0.00054303	0.005206	0.001367
0.00060723	0.005098	0.006368
0.00052162	0.000354	0.000246
0.00011362	0.0005	0.000105
0.00019287	0.000978	0.000403
0.0128042	0.2308
3.6845e-05	0.000223	0.000111
0.002592	0.06774	0.07264
0.0168142	0.1053	0.5002

## Sheet: Figure5A
	MCF7 Viability EC50	MCF7 Degradation EC50		T47D Viability EC50	T47D Degradation EC50
	0.000101894	0.000157
	0.00016489	0.001062		0.000557312	5.73e-05
	0.000128991	0.000524		0.000684269	0.000281
	0.000169912	0.003632		0.15*	0.000144
	0.000230889	0.00028		0.000959032	0.001666
	0.000600841	0.005206		0.00160296	0.000147
	0.000414564	0.005098		0.000563069	0.001367
	0.00111619	0.000354		0.15*	0.006368
	0.000180553	0.0005		0.000547809	0.000246
	0.000265914	0.000978		0.000436776	0.000105
	0.0124967	0.2308		0.00201246	0.000403
	0.00016793	0.000223		0.000367544	0.000111
	0.011971	0.06774		0.15*	0.07264
	0.15*	0.1053		0.15*	0.5002
