# Supplementary material for: A high-throughput platform for single-molecule tracking identifies drug interaction and cellular mechanisms
Source: eLife. 2025 Jan 9;12:RP93183. doi: 10.7554/eLife.93183 (PMC11717362; doi:10.7554/eLife.93183)
Supplement: Figure 6—source data 1. [file elife-93183-fig6-data1.xlsx]

## Sheet: Figure6
	DMSO			Ganetespib			Estradiol			HSP990
Time	Fbound mean	SD	N	Fbound mean	SD	N	Fbound mean	SD	N	Fbound mean	SD	N
4.7	0.02685	0.03193	3	0.01772	0.04942	3	0.21044	0.05866	3	0.00195	0.04058	3
10.09	-0.02685	0.03193	3	0.09559	0.08636	3	0.31514	0.00378	3	0.0179	0.00626	3
15.48	0.02285	0.0156	3	0.12161	0.05637	3	0.46962	0.05973	3	0.12174	0.0479	3
20.87	-0.02285	0.0156	3	0.21686	0.00273	3	0.48419	0.03183	3	0.21163	0.03522	3
26.26	-0.00593	0.02678	3	0.22153	0.01742	3	0.47418	0.01921	3	0.25884	0.03694	3
31.65	0.00593	0.02678	3	0.2818	0.03082	3	0.54342	0.02262	3	0.28019	0.02839	3
37.04	0	0	3	0.29492	0.01012	3	0.518	0.01964	3	0.30064	0.03043	3
42.43	0.01449	0.01829	3	0.2903	0.01941	3	0.49269	0.0075	3	0.27664	0.00582	3
47.83	-0.01449	0.01829	3	0.35619	0.0271	3	0.48838	0.02183	3	0.35006	0.01672	3
53.22	-0.00178	0.01222	3	0.35469	0.03156	3	0.56263	0.02104	3	0.35038	0.01996	3
58.61	0.00178	0.01222	3	0.35941	0.04208	3	0.57291	0.0043	3	0.37746	0.05859	3
64	0	0	3	0.39333	0.04804	3	0.55512	0.03455	3	0.35496	0.05639	3
69.39	0.00378	0.02015	3	0.41533	0.12122	3	0.55827	0.01623	3	0.38674	0.02459	3
74.78	-0.00378	0.02015	3	0.36055	0.01447	3	0.57473	0.01586	3	0.36441	0.004	3
80.17	0.0096	0.01202	3	0.35148	0.02118	3	0.53656	0.00566	3	0.29774	0.08575	3
85.57	-0.0096	0.01202	3	0.32089	0.07669	3	0.54942	0.00161	3	0.3497	0.01351	3
90.96	0	0	3	0.33253	0.02775	3	0.51713	0.04201	3	0.31097	0.01389	3
96.35	-0.00693	0.02385	3	0.35221	0.01418	3	0.54954	0.00802	3	0.33943	0.02479	3
101.74	0.00693	0.02385	3	0.3559	0.01539	3	0.53965	0.01791	3	0.34586	0.02482	3
107.13	-0.01546	0.03713	3	0.38296	0.04346	3	0.56903	0.01193	3	0.35666	0.02306	3
112.52	0.01546	0.03713	3	0.31786	0.01159	3	0.56221	0.01708	3	0.32722	0.03319	3
117.91	0	0	3	0.32775	0.03325	3	0.54165	0.02974	3	0.31824	0.03667	3
123.3	0	0	3	0.33197	0.01753	3	0.57193	0.02574	3	0.34354	0.02632	3
128.7	0.01896		1	0.30388	0.01133	3	0.5728	0.02775	3	0.27856	0.03541	3
134.09	-0.00632	0.01094	3	0.29655	0.02202	3	0.56241	0.03064	3	0.30616	0.0324	3
139.48	-0.00677	0.01447	3	0.30245	0.02745	3	0.58107	0.03356	3	0.2923	0.03135	3
144.87	0.00677	0.01447	3	0.29223	0.06092	3	0.57675	0.0319	3	0.28667	0.05479	3
150.26	-0.00573	0.00611	3	0.30396	0.0295	3	0.57118	0.00934	3	0.27655	0.03327	3
155.65	0.00573	0.00611	3	0.33939	0.03025	3	0.62904	0.04847	3	0.31651	0.02608	3
161.04	0	0	3	0.3254	0.0357	3	0.60552	0.02453	3	0.33666	0.01917	3
166.43	0.00934	0.02162	3	0.28195	0.04653	3	0.58698	0.01506	3	0.25425	0.04386	3
171.83	-0.00934	0.02162	3	0.28345	0.04668	3	0.57002	0.00157	3	0.31784	0.0376	3
177.22	-0.00594	0.0183	3	0.27938	0.01604	3	0.60097	0.00289	3	0.26553	0.00866	3
182.61	0.00594	0.0183	3	0.33614	0.02658	3	0.59112	0.0082	3	0.29357	0.01282	3
188	0	0	3	0.3255	0.01798	3	0.61659	0.02476	3	0.30247	0.01588	3
193.39	-0.00704	0.01567	3	0.38015	0.19602	3	0.60585	0.00912	3	0.29168	0.02907	3
198.78	0.00704	0.01567	3	0.30067	0.02009	3	0.60288	0.01658	3	0.33261	0.03693	3
204.17	-0.01467	0.00987	3	0.27544	0.00502	3	0.58351	0.02504	3	0.28909	0.03103	3
209.57	0.01467	0.00987	3	0.22459	0.06527	3	0.60214	0.01049	3	0.23507	0.07095	3
214.96	0	0	3	0.29566	0.03013	3	0.54897	0.07398	3	0.27105	0.05376	3
220.35	-0.009	0.01323	3	0.25229	0.09325	3	0.56214	0.02674	3	0.2422	0.0302	3
225.74	0.009	0.01323	3	0.28847	0.02854	3	0.57066	0.03612	3	0.27338	0.05554	3
231.13	-0.02997	0.02854	3	0.29816	0.06996	3	0.57516	0.06378	3	0.26054	0.01973	3
236.52	0.02997	0.02854	3	0.25244	0.05644	3	0.56194	0.07926	3	0.22265	0.11515	3
241.91	0	0	3	0.26801	0.04328	3	0.56494	0.03326	3	0.23091	0.06633	3
247.3	0	0	3	0.2882	0.03294	3	0.58296	0.01835	3	0.26709	0.02555	3
Time (min)	DMSO			Bortezomib			Carfilzomib
	Fbound mean	SD	N	Fbound mean	SD	N	Fbound mean	SD	N
0	0.01926	-0.03202	0.0234	0.00516	0.03453	0.01525	0.02597	0.02956	0.03766
7.83	0.00954	0.00352	0.00397	0.02794	-0.00686	0.01586	0.0094	0.00024	0.03182
15.67	0.00837	0.03945	0.00249	0.00977	0.03872	0.0197	0.00842	0.01805	0.02109
23.5	0.00073	0.00061	-0.00075	0.0101	0.02303	0.01262	-0.00031	0.00043	0.01896
31.33	0.00509	-0.01624	0.01679	0.01607	0.00908	-0.00299	0.03519	0.06353	0.02434
39.17	0.00909	0.02015	-0.00462	0.03615	0.0582	0.01786	0.00137	0.01442	-0.0086
47	0.00104	-0.00555	-0.01073	0.01844	0.02877	0.00372	-0.00325	0.02384	0.00816
54.83	0.00511	0.00495	0.0066	0.05409	0.08507	0.02308	0.06141	0.0603	0.00979
62.67	0.0018	-0.00322	-0.0025	0.06249	0.08003	0.03387	0.05143	0.02025	0.03586
70.5	0.00289	0.00576	0.01206	0.08311	0.15509	0.03958	0.00845	0.10013	0.01288
78.33	0.005	-0.00041	-0.01095	0.08183	0.08756	0.03072	0.02081	0.08204	0.01169
86.17	0.01791	0.01684	0.00189	0.05487	0.13612	0.06642	-0.03101	0.06986	0.06939
94	0.00399	-0.00151	0.01375	0.16684	0.12473	0.05889	0.07208	0.03227	0.09216
101.83	0.02596	-0.00422	0.00104		0.19472	0.09665		0.13708	0.07398
109.67		-0.00306	0.00439		0.17542	0.08329		0.12086	0.1031
117.5	0.02212	0.00795	0.00429		0.1944	0.08006	0.02809	0.15847	0.04907
125.33	0.04594	-0.00736	-0.0087	0.13611	0.22221	0.08089	0.10157	0.22926	0.07657
133.17	0.03073	0.00827	0.00667	0.14389	0.25484	0.10012	0.16206	0.23152	0.10279
141	0.03817	0.00805	0.00712	0.15531	0.28299	0.11706	0.07909	0.30214	0.11854
148.83	0.03444	-0.00052	-0.00107	0.16534	0.24361	0.15935	0.16519	0.22677	0.09462
156.67	0.05515	0.03539	-0.00374	0.09208	0.25427	0.14654	0.00974	0.28224	0.11943
164.5	0.06311	-0.02898	0.01185	0.24923	0.24629	0.15471	0.18939	0.2992	0.21537
172.33	0.0042	0.0318	0.00561	0.22226	0.32386	0.13185	0.17257	0.33402	0.18522
180.17	0.00868	0.00102	0.00515	0.23224	0.28418	0.17854	0.11259	0.35504	0.24578
188	0.00729	0.00749	0.0036	0.18335	0.30298	0.1658	0.05621	0.31445	0.18617
195.83	0.03623	-0.00753	-0.01077	0.22365	0.32129	0.13031	0.26832	0.33707	0.25244
203.67	0.04135	0.01685	0.00894	0.1973	0.36983	0.21453	0.2265	0.33615	0.18959
211.5	0.01064	-0.00142	0.00254	0.21918	0.32774	0.15164	0.2353	0.33128	0.27911
219.33	0.01388	0.00067	0.01254	0.26159	0.33378	0.2043	0.31821	0.3636	0.14515
227.17	0.02193	-0.00256	-0.00877	0.31244	0.37964	0.20528	0.29034	0.39649	0.28943
235	0.09086	0.00735	-0.00191	0.3445	0.35711	0.22669	0.33377	0.36339	0.27955

## Sheet: Figure6A
	NVP-2			Torin 1			Dinaciclib			Bortezomib			Delanzomib			XL888			Ixazomib			HSP990
	Fbound mean	SD	N	Fbound mean	SD	N	Fbound mean	SD	N	Fbound mean	SD	N	Fbound mean	SD	N	Fbound mean	SD	N	Fbound mean	SD	N	Fbound mean	SD	N
5.65e-05	0.00107	0.0095	6				0.01084	0.02389	5	-0.00117	0.00712	6	0.01564	0.02418	6	0.04672	0.02595	6	0.01196	0.03347	6	0.01291	0.01284	6
0.00016935	-0.00077	0.03331	5				0.00933	0.0071	6	0.01455	0.01936	5	-0.00438	0.03041	6	0.01223	0.0282	5	-0.01688	0.02282	5	0.00633	0.02602	6
0.00050805	-0.01329	0.02095	6				-0.00716	0.00753	5	0.01244	0.02345	6	0.0047	0.02776	6	0.03531	0.02378	6	0.013	0.0265	5	-0.0005	0.01324	4
0.00152416	-0.03512	0.02201	6				0.00221	0.01569	6	-0.01173	0.02042	4	0.01021	0.01203	6	0.07991	0.04017	6	0.01559	0.01982	6	0.10969	0.01239	4
0.00457247	-0.06176	0.01724	6				-0.0194	0.0157	5	-0.00026	0.02407	4	0.00115	0.04045	5	0.23813	0.04491	5	-0.01122	0.02112	5	0.27482	0.01743	6
0.0137174	-0.06779	0.02965	5				-0.05583	0.01965	6	0.03213	0.05488	5	0.02802	0.03918	6	0.31603	0.01178	4	0.00736	0.01094	6	0.2995	0.03705	5
0.0411523	-0.06832	0.02524	5				-0.06455	0.01676	6	0.08855	0.08589	6	0.07439	0.06814	6	0.32258	0.05026	6	0.08856	0.08503	5	0.32805	0.02849	5
0.123457	-0.077	0.02897	6				-0.08846	0.02246	5	0.24518	0.0457	6	0.16593	0.05037	6	0.35852	0.03063	6	0.16311	0.03646	6	0.34743	0.03633	4
0.37037	-0.07764	0.02207	5				-0.07277	0.02977	5	0.23166	0.04923	6	0.19853	0.05022	5	0.36194	0.03648	6	0.17582	0.0444	6	0.35028	0.01905	6
1.11111	-0.09458	0.02241	5				-0.08639	0.02038	5	0.30739	0.00956	6	0.20033	0.08121	6	0.33175	0.02087	6	0.21086	0.06514	6	0.3291	0.04313	6
3.33333	-0.07108	0.02606	5				-0.08165	0.04031	5	0.31441	0.01115	5	0.21519	0.04864	6	0.37376	0.02501	5	0.21465	0.05793	6	0.33125	0.02711	5
10	-0.09623	0.01649	4				-0.07151	0.03146	5	0.33954	0.02384	6	0.20655	0.03994	6	0.35997	0.03963	4	0.25429	0.03223	6	0.33009	0.05467	6
1.13e-05				-0.00241	0.02317	4
3.39e-05				-0.0043	0.02005	5
0.00010161				-0.02255	0.01567	6
0.00030483				-0.00648	0.01547	5
0.0009145				-0.01355	0.02407	5
0.00274348				-0.03641	0.01911	5
0.00823045				-0.04344	0.01433	5
0.0246914				-0.05019	0.0106	6
0.0740741				-0.03856	0.02751	5
0.222222				-0.03999	0.02338	4
0.666667				-0.02638	0.02701	6
2				-0.04781	0.0217	4

## Sheet: Supplement 2A
CDK4/6	CDK9	pan-CDK	HSP90	mTOR	Proteasome
					0.25887
				-0.03866
				-0.05214
				-0.03019
			0.31546
				-0.0383
			0.01748
			0.17243
		-0.05769
		0.00624
					0.23422
			0.33036
			0.33491
			0.32132
		-0.07136
		-0.02379
		-0.03242
				-0.00047
		-0.0762
				-0.00842
					0.23659
					0.22568
				-0.04232
					0.13876
		-0.01693
			0.34925
			0.34902
				-0.05324
		-0.04106
		-0.04106
				-0.04494
				0.00819
			-0.00179
-0.04402
		-0.06588
				-0.0257
				-0.04236
					0.26861
-0.02594
					0.1681
			0.33099
			0.33588
-0.02862
				-0.00322
				0.05205
			0.33277
				-0.07242
	-0.0563
-0.00958
				-0.0676
	-0.02926
-0.01127
				-0.07758
				-0.08556
				-0.08556
	-0.06991
	-0.08448
	-0.10279

## Sheet: Supplement 2B
Index	SMT			No Repeat			ER Proteasome			ER HSP90			ER CDKi			ER mTOR
Compound index	Fbound mean	SD	N	Fbound mean	SD	N	Fbound mean	SD	N	Fbound mean	SD	N	Fbound mean	SD	N	Fbound mean	SD	N
1	-0.21229	0.03036	4
2	-0.19996	0.01276	2
3	-0.18995	0.01374	2
4	-0.14968	0.02364	2
5	-0.12579	0.03737	4
6	-0.1257	0.00045	2
7	-0.10516	0.00016	2
8	-0.10279	0.00033	2										-0.10279	0.00033	2
9	-0.09483	0.01693	2
10	-0.08777	0.0109	4
11	-0.08556	0.00654	2													-0.08556	0.00654	2
12	-0.08448	0.01569	2										-0.08448	0.01569	2
13	-0.08435	0.00345	2										-0.08435	0.00345	2
14	-0.07897	0.02786	4
15	-0.07758	0.01214	2													-0.07758	0.01214	2
16	-0.07275	0.02933	4
17	-0.07242	0.00252	2													-0.07242	0.00252	2
18	-0.06991	0.01508	2										-0.06991	0.01508	2
19	-0.06931	0.01207	2										-0.06931	0.01207	2
20	-0.0692	0.06601	2
21	-0.06588	0.03869	3										-0.06588	0.03869	3
22	-0.06049	0.04021	2
23	-0.05324	0.00817	3													-0.05324	0.00817	3
24	-0.04494	0.01842	4													-0.04494	0.01842	4
25	-0.04441	0.0151	4
26	-0.04232	0.00954	4													-0.04232	0.00954	4
27	-0.03983	0.00892	4	-0.03983	0.00892	4
28	-0.02326	0.02221	4	-0.02326	0.02221	4
29	-0.0174	0.00742	3	-0.0174	0.00742	3
30	-0.01674	0.00953	4	-0.01674	0.00953	4
31	-0.00947	0.00368	2	-0.00947	0.00368	2
32	-0.00768	0.01808	8	-0.00768	0.01808	8
33	-0.0068		1	-0.0068		1
34	-0.00655	0.00312	2	-0.00655	0.00312	2
35	-0.00451	0.01206	4	-0.00451	0.01206	4
36	-0.00388	0.01808	3	-0.00388	0.01808	3
37	-0.00235	0.02561	3	-0.00235	0.02561	3
38	-0.00111		1	-0.00111		1
39	0.00172	0.01069	4	0.00172	0.01069	4
40	0.00485	0.06436	2	0.00485	0.06436	2
41	0.00628	0.00998	2	0.00628	0.00998	2
42	0.0098	0.03422	7	0.0098	0.03422	7
43	0.01614	0.0315	6	0.01614	0.0315	6
44	0.017	0.02139	4	0.017	0.02139	4
45	0.01709	0.02414	8	0.01709	0.02414	8
46	0.01802	0.02945	2	0.01802	0.02945	2
47	0.01869	0.04192	8	0.01869	0.04192	8
48	0.02324		1	0.02324		1
49	0.02432	0.034	2	0.02432	0.034	2
50	0.02771	0.01097	3	0.02771	0.01097	3
51	0.03386	0.08181	8	0.03386	0.08181	8
52	0.03437	0.031	2	0.03437	0.031	2
53	0.04963	0.07389	7	0.04963	0.07389	7
54	0.05205	0.0053	2	0.05205	0.0053	2										0.05205	0.0053	2
55	0.05956	0.09674	2	0.05956	0.09674	2
56	0.11034		1	0.11034		1
57	0.11224	0.0211	2	0.11224	0.0211	2
58	0.12084	0.04826	4
59	0.13876	0.03978	4				0.13876	0.03978	4
60	0.15701	0.02716	2
61	0.16313	0.04126	4	0.16313	0.04126	4
62	0.1681	0.05943	4				0.1681	0.05943	4
63	0.17243	0.11285	4							0.17243	0.11285	4
64	0.19569	0.11385	4
65	0.20333	0.02323	2
66	0.20889	0.03577	2
67	0.21805	0.00652	2				0.21805	0.00652	2
68	0.22568	0.05235	2				0.22568	0.05235	2
69	0.22682	0.0387	2
70	0.23041	0.05863	4	0.23041	0.05863	4
71	0.23196	0.0026	2
72	0.23659	0.03622	4				0.23659	0.03622	4
73	0.25492	0.04988	2
74	0.25887	0.0047	2				0.25887	0.0047	2
75	0.26861	0.02819	3				0.26861	0.02819	3
76	0.27097	0.03957	4
77	0.27656	0.01901	2
78	0.28097	0.01532	4
79	0.31546	0.06712	4							0.31546	0.06712	4
80	0.3185	0.01262	4
81	0.32132	0.05449	4							0.32132	0.05449	4
82	0.32378	0.01278	4
83	0.33036	0.05522	4							0.33036	0.05522	4
84	0.33099	0.02198	4							0.33099	0.02198	4
85	0.33277	0.00368	2							0.33277	0.00368	2
86	0.33491	0.02906	4							0.33491	0.02906	4
87	0.33588	0.02363	4							0.33588	0.02363	4
88	0.33904	0.00915	2
89	0.34902	0.02687	3							0.34902	0.02687	3
90	0.34925	0.01226	4							0.34925	0.01226	4
91	0.38766	0.01687	4

## Sheet: Supplement2C
Index	SMT			ER Proteasome			ER HSP90			ER CDKi			ER mTOR
Compound index	Fbound mean	SD	N	Fbound mean	SD	N	Fbound mean	SD	N	Fbound mean	SD	N	Fbound mean	SD	N
1	-0.0541	0.0098	6
2	-0.0461	0.0159	6
3	-0.0393	0.0156	6
4	-0.0365	0.0153	6
5	-0.0513	0.0254	6
6	-0.0581	0.0138	2
7	-0.0434	0.0204	6
8	-0.063	0.0165	2							-0.063	0.0165	2
9	-0.0437	0.0179	2
10	-0.0059	0.0095	6
11	-0.0073	0.0112	6										-0.0073	0.0112	6
12	-0.0434	0.009	2							-0.0434	0.009	2
13	-0.0642	0.0141	2							-0.0642	0.0141	2
14	-0.0102	0.0049	6
15	-0.0016	0.0139	6										-0.0016	0.0139	6
16	0.0015	0.0098	6
17	-0.0086	0.0174	6										-0.0086	0.0174	6
18	-0.0669	0.0044	2							-0.0669	0.0044	2
19	-0.0645	0.0178	2							-0.0645	0.0178	2
20	-0.0081	0.0305	6
21	-0.0802	0.0063	2							-0.0802	0.0063	2
22	-0.0475	0.0171	5
23	-0.0061	0.0141	6										-0.0061	0.0141	6
24	-0.0057	0.0133	6										-0.0057	0.0133	6
25	-0.0301	0.0086	6
26	-0.0033	0.0279	3										-0.0033	0.0279	3
27	0.0046	0.0052	6
28	0.0077	0.013	6
29	-0.0019	0.0171	6
30	-0.0062	0.0093	6
31	-0.0049	0.0088	6
32	-0.0062	0.0169	6
33	0.0065	0.0133	6
34	-0.0099	0.0083	6
35	0.0078	0.0147	6
36	0.0011	0.011	6
37	-0.0007	0.0112	6
38	0.0018	0.011	6
39	0.0006	0.0141	6
40	-0.0039	0.0143	6
41	0.0227	0.0134	5
42	-0.0135	0.0203	6
43	0.0041	0.0024	2
44	0.0009	0.0135	6
45	0.0153	0.01	6
46	-0.0078	0.0197	6
47	0.0304	0.0109	5
48	0.0005	0.0106	6
49	-0.0069	0.0182	6
50	0.0059	0.0139	6
51	0.0035	0.0218	6
52	-0.0103	0.0197	6
53	-0.0068	0.0124	6
54	0.0035	0.0089	6										0.0035	0.0089	6
55	-0.0052	0.0133	6
56	-0.0217	0.0034	2
57	0.0002	0.0201	6
58	0.0363	0.0243	5
59	0.0019	0.0176	6	0.0019	0.0176	6
60	-0.0082	0.0073	6
61	-0.0044	0.0185	6
62	0.0065	0.0133	6	0.0065	0.0133	6
63	0.1322	0.0395	6				0.1322	0.0395	6
64	0.0112	0.0321	6
65	0.0207	0.0223	6
66	0.0008	0.0202	2
67	0.079	0.0387	6	0.079	0.0387	6
68	0.0277	0.0168	6	0.0277	0.0168	6
69	0.2703	0.0703	6
70	0.0126	0.0162	6
71	-0.0355	0.0191	6
72	0.0515	0.0497	6	0.0515	0.0497	6
73	0.0738	0.0268	6
74	0.0516	0.0814	6	0.0516	0.0814	6
75	0.1031	0.102	6	0.1031	0.102	6
76	0.1366	0.0356	6
77	-0.0022	0.0094	6
78	0.0708	0.0543	6
79	0.1713	0.0476	6				0.1713	0.0476	6
80	0.1372	0.0218	6
81	0.1372	0.0346	6				0.1372	0.0346	6
82	-0.0027	0.0141	6
83	0.1481	0.0539	6				0.1481	0.0539	6
84	0.1346	0.0439	6				0.1346	0.0439	6
85	0.154	0.0377	2				0.154	0.0377	2
86	0.1577	0.0417	6				0.1577	0.0417	6
87	0.1488	0.057	6				0.1488	0.057	6
88	0.1339	0.036	6
89	0.1427	0.0044	2				0.1427	0.0044	2
90	0.1541	0.0008	2				0.1541	0.0008	2
91	-0.0016	0.0139	6

## Sheet: Supplement 2D
Index	SMT			No Repeat			ER Proteasome			ER HSP90			ER CDKi			ER mTOR
Compound index	Fbound mean	SD	N	Fbound mean	SD	N	Fbound mean	SD	N	Fbound mean	SD	N	Fbound mean	SD	N	Fbound mean	SD	N
1	-0.01	0.0178	6
2	-0.0033	0.0045	6
3	0.0024	0.0137	6
4	-0.0072	0.0068	6
5	-0.0086	0.0083	6
6	-0.0124	0.0132	6
7	-0.0013	0.0139	6
8	0.0054	0.0141	5										0.0054	0.0141	5
9	0.0041	0.0231	6
10	0.0032	0.0089	6
11	-0.0076	0.0183	6													-0.0076	0.0183	6
12	-0.0045	0.0162	6										-0.0045	0.0162	6
13	-0.0098	0.0057	6										-0.0098	0.0057	6
14	0.001	0.009	6
15	-0.0025	0.0076	5													-0.0025	0.0076	5
16	-0.0064	0.0209	6
17	-0.0119	0.0099	6													-0.0119	0.0099	6
18	-0.0045	0.0051	6										-0.0045	0.0051	6
19	0.0049	0.0132	6										0.0049	0.0132	6
20	-0.0004	0.0165	6
21	-0.0112	0.0088	6										-0.0112	0.0088	6
22	0.001	0.0124	6
23	-0.0107	0.0113	5													-0.0107	0.0113	5
24	-0.0207	0.0078	6													-0.0207	0.0078	6
25	-0.0047	0.0155	6
26	-0.0141	0.0125	5													-0.0141	0.0125	5
27	-0.0028	0.019	6
28	0.0012	0.0082	6
29	0.0013	0.022	5
30	-0.0069	0.0102	6
31	0.008	0.0128	6
32	-0.0023	0.0023	6
33	0.0005	0.0217	6
34	0.0032	0.0122	6
35	0.0013	0.0057	6
36	-0.0016	0.006	5
37	-0.0044	0.0082	6
38	0.0004	0.008	5
39	-0.0006	0.0165	6
40	-0.0014	0.0109	6
41	0	0.0128	6
42	-0.0046	0.009	6
43	0.0114	0.0194	6
44	0.0064	0.0143	6
45	0.0065	0.0067	6
46	-0.0168	0.0042	6
47	-0.0113	0.0145	6
48	-0.0065	0.0135	6
49	0.0003	0.0104	6
50	-0.0034	0.0073	6
51	-0.0048	0.0149	5
52	0.0038	0.0168	6
53	-0.0045	0.0199	6
54	-0.0018	0.0124	6													-0.0018	0.0124	6
55	0.0003	0.0106	6
56	0.0184	0.0276	4
57	0.0031	0.0177	6
58	0.0013	0.0169	6
59	0.0044	0.0157	6				0.0044	0.0157	6
60	-0.0089	0.0086	6
61	0.009	0.0225	6
62	-0.0052	0.0113	6				-0.0052	0.0113	6
63	0.0687	0.0316	6							0.0687	0.0316	6
64	0.0408	0.0145	5
65	0.0123	0.0076	6
66	-0.0035	0.0126	6
67	0.0271	0.0329	6				0.0271	0.0329	6
68	0.0173	0.0169	6				0.0173	0.0169	6
69	0.2656	0.1431	6
70	0.0089	0.0154	6
71	-0.0031	0.0066	6
72	0.0185	0.0253	6				0.0185	0.0253	6
73	0.0132	0.0139	6
74	0.0442	0.0453	6				0.0442	0.0453	6
75	0.0244	0.0245	6				0.0244	0.0245	6
76	0.0731	0.0286	6
77	0.0016	0.008	6
78	0.0307	0.0461	6
79	0.0706	0.0241	6							0.0706	0.0241	6
80	0.0508	0.017	5
81	0.0579	0.0259	6							0.0579	0.0259	6
82	-0.0066	0.0096	6
83	0.0577	0.0289	6							0.0577	0.0289	6
84	0.0682	0.0289	6							0.0682	0.0289	6
85	0.0584	0.0359	6							0.0584	0.0359	6
86	0.0809	0.0197	6							0.0809	0.0197	6
87	0.0688	0.0069	6							0.0688	0.0069	6
88	0.0899	0.0296	6
89	0.0573	0.0187	6							0.0573	0.0187	6
90	0.0697	0.0245	6							0.0697	0.0245	6
91	-0.0027	0.0118	6

## Sheet: Supplement1B
Concentration	Curaxin			Torkinib			AT867			MG132			XL888
	Fbound Mean	SD	N	Fbound Mean	SD	N	Fbound Mean	SD	N	Fbound Mean	SD	N	Fbound Mean	SD	N
5.65e-05	0.01755	0.01611	6	-0.00458	0.0216	6	-0.00266	0.02485	6	-0.00347	0.0416	6	0.04672	0.02595	6
0.00016935	-0.00037	0.01506	6	-0.0024	0.03194	6	0.00152	0.0092	6	-0.01266	0.02304	6	0.01223	0.0282	5
0.00050805	0.00642	0.01081	5	0.00872	0.02339	6	0.00174	0.02946	5	-0.00922	0.03202	6	0.03531	0.02378	6
0.00152416	0.00149	0.02364	6	0.01842	0.03101	6	-0.00276	0.0206	5	-0.00959	0.02275	5	0.07991	0.04017	6
0.00457247	-0.00313	0.00793	6	-0.01396	0.03074	6	-0.01741	0.01278	6	-0.00538	0.0242	6	0.23813	0.04491	5
0.0137174	-0.00344	0.00889	5	-0.01323	0.03065	6	-0.01296	0.03182	6	0.00821	0.01559	6	0.31603	0.01178	4
0.0411523	0.0014	0.01459	6	-0.01592	0.02316	6	0.00668	0.01907	6	0.00771	0.02217	6	0.32258	0.05026	6
0.123457	-0.00303	0.01611	6	-0.02677	0.02843	6	-0.01381	0.02235	6	0.01496	0.01889	6	0.35852	0.03063	6
0.37037	-0.01463	0.01548	6	-0.06643	0.02245	5	-0.00729	0.00602	4	0.03235	0.03124	6	0.36194	0.03648	6
1.11111	-0.1	0.01866	4	-0.06172	0.02075	5	0.00378	0.01729	6	0.16874	0.05889	6	0.33175	0.02087	6
3.33333	-0.14189	0.02012	5	-0.06019	0.01679	6	-0.00478	0.02754	6	0.22031	0.02018	6	0.37376	0.02501	5
10	-0.13864	0.02517	4	-0.05375	0.01834	5	0.01177	0.03285	2	0.28085	0.02422	6	0.35997	0.03963	4

## Sheet: Supplement1C
Rep1		Not hit			1			2			unclustered			3			4			5			6			all hits
0.40623	0.00695				0.43708	0.00042	4																			0.43708	0.00042	4
0.44581	0.0129				0.43918	0.00258	4																			0.43918	0.00258	4
0.46411	0.00552				0.51173	0.00189	4																			0.51173	0.00189	4
0.46944	0.00369				0.46273	0.00543	4																			0.46273	0.00543	4
0.4723	0.01581				0.47583	0.00784	4																			0.47583	0.00784	4
0.47408	0.00771				0.47516	0.0171	4																			0.47516	0.0171	4
0.48781	0.00035				0.4844	0.01036	4																			0.4844	0.01036	4
0.49565	0.00507				0.45675	0.00193	4																			0.45675	0.00193	4
0.50466	0.00854				0.44851	0.01214	4																			0.44851	0.01214	4
0.52779	0.02259				0.47523	0	2																			0.47523	0	2
0.52817	0.01647				0.46876	0.00687	6																			0.46876	0.00687	6
0.53017	0.00319				0.48628	0.00786	4																			0.48628	0.00786	4
0.55109	0.00086				0.47301	0.00483	12																			0.47301	0.00483	12
-0.0563	0.0082
-0.05223	0.00498							-0.1096	0.00886	10																-0.1096	0.00886	10
0.01625	0.00935							0.18408	0.00512	4																0.18408	0.00512	4
0.03968	0.01897							0.06107	0.03046	4																0.06107	0.03046	4
0.05264	0.01561							0.05129	0	2																0.05129	0	2
0.06496	0.04778
0.06774	0.02496							0.06821	0.00086	4																0.06821	0.00086	4
0.08186	0.01493
0.10079	0.03169
0.10712	0.0562							0.17438	0.01507	4																0.17438	0.01507	4
0.10981	0.012							0.09796	0.01708	6																0.09796	0.01708	6
0.12403	0.02512							0.16563		1																0.16563		1
0.12449	0.00143
0.15118	0.00545
0.18712	0.15631
0.19475	0.02209							0.16377	0	2																0.16377	0	2
0.19927	0.12191							0.09708	0	2																0.09708	0	2
0.25831	0.01163							0.22901	0.01879	4																0.22901	0.01879	4
0.2661	0.00233							0.34243	0	2																0.34243	0	2
0.27932	0.00126							0.33628	0.00472	4																0.33628	0.00472	4
0.31102	0.02293
0.4393	0.01915							0.41413	0.0134	32																0.41413	0.0134	32
0.4444	0.00039							0.45159	0.00386	4																0.45159	0.00386	4
0.4855	0.00629
0.48642	0.0069							0.44678	0.00619	4																0.44678	0.00619	4
0.29385	0.02875													0.30143	0.0081	16										0.30143	0.0081	16
0.29653	0.0276													0.30068	0.0005	12										0.30068	0.0005	12
0.32614	0.015													0.29049	0.03261	4										0.29049	0.03261	4
0.32716	0.01668													0.30774	0.01288	4										0.30774	0.01288	4
0.33838	0.02599
0.34185	0.02298													0.3057	0.01275	4										0.3057	0.01275	4
0.36472	0.0048													0.30657	0.00112	4										0.30657	0.00112	4
0.06743	0.0035																0.06487	0	2							0.06487	0	2
0.08952	0.00185
0.11591	0.03409
0.25367	0.06879
0.3297	0.0248																0.32416	0.00017	4							0.32416	0.00017	4
0.3791	0.00948																0.40758	0	2							0.40758	0	2
0.37927	0.04376																0.39511	0.00481	4							0.39511	0.00481	4
0.04272	0.05081																						0.08496	0.0477	4	0.08496	0.0477	4
0.05748	0.0348																						0.07884	0.01527	24	0.07884	0.01527	24
0.07736	0.00922
0.08854	0.04635																						0.1041	0.03496	4	0.1041	0.03496	4
0.09001	0.02436
0.12769	0.0039																						0.07437	0.0148	4	0.07437	0.0148	4
0.13274	0.00702																						0.14382	0	2	0.14382	0	2
0.17232	0.00367																						0.1622	0.00477	4	0.1622	0.00477	4
0.28326	0.00686
0.2937	0.0135																						0.30366	0.00527	4	0.30366	0.00527	4
0.31275	0.02182																						0.34079	0.05442	32	0.34079	0.05442	32
0.43096	0.01345																						0.41584	0	2	0.41584	0	2
0.4753	0.01238																						0.49076	0.00853	4	0.49076	0.00853	4
0.4785	0.00033																						0.48202	0	2	0.48202	0	2
0.49571	0.02244																						0.45346	0.01292	4	0.45346	0.01292	4
0.51005	0.00285																						0.46662	0	2	0.46662	0	2
-0.01972	0.00917
-0.01698	0.00225
-0.13379	0.00796
-0.05793	0.01007										-0.07369	0.01683	2													-0.07369	0.01683	2
-0.04367	0.02723										-0.06734	0.05225	2													-0.06734	0.05225	2
-0.19996	0.01042
-0.18995	0.01122
0.11738	0.05545										0.09502	0.04678	4													0.09502	0.04678	4
0.11786	0.00167										0.08935	0.02657	4													0.08935	0.02657	4
0.05907	0.00282										0.06831	0.01654	4													0.06831	0.01654	4
0.13061	0.01877										0.19565	0.01522	4													0.19565	0.01522	4
-0.08435	0.00345
-0.0558	0.00658
0.34278	0.01265
0.39141	0.0133
0.05678	0.00415
0.34376	0.0292										0.35952	0	2													0.35952	0	2
0.35066	0.00591										0.34783	0.01613	4													0.34783	0.01613	4
0.03828	0.00037										0.09612	0.01159	4													0.09612	0.01159	4
0.19648	0.04435
0.20513	0.00749										0.13367	0	2													0.13367	0	2
0.26575	0.01781										0.33753	0.04341	4													0.33753	0.04341	4
0.06008	0.00462										0.11029	0.00133	4													0.11029	0.00133	4
0.36253	0.0191										0.37058	0	2													0.37058	0	2
0.05281	0.02385										0.14133	0.01863	4													0.14133	0.01863	4
0.49064	0.0143										0.44129	0.00506	4													0.44129	0.00506	4
0.12222	0.01453										0.11524	0.01315	8													0.11524	0.01315	8
0.14102	0.05506										0.20556	0	4													0.20556	0	4
0.2463	0.28734										0.44538	0.00272	4													0.44538	0.00272	4
0.49288	0.01303										0.43356	0.00163	4													0.43356	0.00163	4
-0.19246	0.02819										-0.23212	0.00051	4													-0.23212	0.00051	4
-0.14968	0.0193
-0.10516	0.00013
-0.10279	0.00033
-0.09695	0.00997										-0.15462	0.02182	4													-0.15462	0.02182	4
-0.09483	0.01311
-0.09418	0.00136										-0.05131	0.0222	4													-0.05131	0.0222	4
-0.09416	0.01173										-0.06918	0	2													-0.06918	0	2
-0.09129	0.0128										-0.08426	0.00337	8													-0.08426	0.00337	8
-0.0908	0.01086
-0.08556	0.00495
-0.08448	0.01569
-0.0808	0.00838
-0.07758	0.00991
-0.07242	0.00206
-0.07064	0.01539
-0.06991	0.01508
-0.06931	0.01207
-0.0692	0.0539
-0.0676	0.01579
-0.06266	0										-0.04853	0.00044	4													-0.04853	0.00044	4
-0.06226	0.02837										-0.04856	0.01001	8													-0.04856	0.01001	8
-0.06174	0.0197										-0.0962	0.01929	4													-0.0962	0.01929	4
-0.06084	0.00992										-0.06375	0.02119	4													-0.06375	0.02119	4
-0.06054	0.02185
-0.06049	0.03283
-0.05487	0.00708
-0.05049	0.02589
-0.04942	0.01618										-0.07218	0.01183	4													-0.07218	0.01183	4
-0.04891	0.0019										-0.05653	0	2													-0.05653	0	2
-0.04777	0.01259										-0.11886	0.03204	8													-0.11886	0.03204	8
-0.04429	0.02135										-0.07043	0.02824	4													-0.07043	0.02824	4
-0.04425	0.01014										-0.10916	0	5													-0.10916	0	5
-0.04355	0.01925										-0.06073	0.00219	4													-0.06073	0.00219	4
-0.04172	0.00346										-0.07328	0.01126	4													-0.07328	0.01126	4
-0.03679	0.00903										-0.07913	0	2													-0.07913	0	2
-0.01566	0.0377
-0.01381	0
-0.00908	0.01376										0.012	0	2													0.012	0	2
-0.00774	0.02181										0.13946	0.02596	4													0.13946	0.02596	4
-0.00111	0
0.00141	0.00153
0.00419	0.01539
0.01461	0.01304										-0.00511	0	2													-0.00511	0	2
0.01686	0.00728
0.03904	0.00922										0.09413	0.00591	4													0.09413	0.00591	4
0.04618	0.00906										0.08545	0.00783	4													0.08545	0.00783	4
0.05078	0.00232
0.05084	0.01899
0.05091	0.00907
0.05205	0.00433
0.05253	0
0.05301	0.0144
0.05568	0
0.05619	0.01471										0.12667	0.01161	4													0.12667	0.01161	4
0.05956	0.07898
0.05971	0
0.0604	0.0038										0.05527	0.01932	4													0.05527	0.01932	4
0.06314	0.01907
0.06485	0.0064										0.06142	0	2													0.06142	0	2
0.06513	0
0.06697	0.02128										0.05578	0.00784	4													0.05578	0.00784	4
0.07277	0.02004										0.05959	0.01832	4													0.05959	0.01832	4
0.08419	0.0415
0.09084	0.00859
0.09515	0.00975										0.14653	0.05294	4													0.14653	0.05294	4
0.09768	0.00316										0.15981	0.01548	4													0.15981	0.01548	4
0.0996	0.00241										0.29177	0.03603	4													0.29177	0.03603	4
0.11034	0
0.11117	0.02245
0.11224	0.01723
0.11229	0.0079										0.14177	0	2													0.14177	0	2
0.14116	0.06975										0.19504	0.01619	4													0.19504	0.01619	4
0.14278	0.01314
0.14692	0.0066										0.1306	0.05425	4													0.1306	0.05425	4
0.15701	0.02218
0.1866	0.01519										0.27422	0.03905	4													0.27422	0.03905	4
0.18968	0.00474
0.20333	0.01896
0.20561	0.00732										0.26757	0.00334	4													0.26757	0.00334	4
0.20889	0.02642
0.21111	0.03303										0.20521	0.00544	4													0.20521	0.00544	4
0.22568	0.04274
0.22682	0.0316
0.22909	0.00075
0.23196	0.00212
0.25038	0.00607										0.21805	0.00532	4													0.21805	0.00532	4
0.25343	0.01177										0.29895	0	2													0.29895	0	2
0.25492	0.04073
0.25665	0.00376
0.25887	0.00384
0.26388	0.0529										0.08097	0.01925	4													0.08097	0.01925	4
0.27544	0.01434										0.28651	0.0135	4													0.28651	0.0135	4
0.27656	0.01552
0.30404	0.00704										0.23791	0.01294	4													0.23791	0.01294	4
0.31575	0.01237										0.33181	0.00142	4													0.33181	0.00142	4
0.32401	0.0134										0.313	0.00762	4													0.313	0.00762	4
0.32414	0.01704										0.3547	0.00695	12													0.3547	0.00695	12
0.33277	0.003
0.33845	0.00857										0.33331	0.03203	4													0.33331	0.03203	4
0.33904	0.00747
0.34073	0.01046										0.32124	0.02457	4													0.32124	0.02457	4
0.35735	0.0017										0.28528	0.04972	4													0.28528	0.04972	4
0.35774	0.00076
0.35979	0.00598										0.31002	0.00127	4													0.31002	0.00127	4
0.36792	0.03828										0.26299	0.01434	4													0.26299	0.01434	4
0.36965	0.01479										0.29106	0.04199	4													0.29106	0.04199	4
0.37227	0.01955										0.38796	0	2													0.38796	0	2
0.39417	0.01414										0.38115	0.01602	4													0.38115	0.01602	4
0.41161	0.01218										0.35436	0.01579	16													0.35436	0.01579	16
0.43217	0.00624										0.43138	0.00585	4													0.43138	0.00585	4
0.43307	0.00014										0.44617	0.00398	4													0.44617	0.00398	4
-0.06861	0.00711	0.01806	0.01435	4
-0.06262	0.0605	-0.0162	0.00085	4
-0.05848	0.00939	-0.02381	0.02539	4
-0.05768	0.01567	-0.0322	0.0005	4
-0.05724	0.02948	-0.01131	0.01524	4
-0.05669	0.00597	0.00422	0.0219	4
-0.05444	0.00686	-9e-05	0.00782	4
-0.05215	0.01548	-0.04436	0	2
-0.05204	0.00013	0.00369	0.001	4
-0.0509	0.0022	0.03332	0.0306	4
-0.05014	0.02041
-0.04968	0.02269	-0.05097	0.00036	4
-0.04917	0.00314	-0.02056	0.0122	4
-0.04911	0.02298	-0.01762	0.0115	4
-0.04882	0.0049	-0.02123	0.00589	4
-0.04879	0.00988	-0.03043	0.01193	4
-0.04837	9e-05	-0.04707	0	2
-0.04832	0.0222	-0.04933	0.00807	4
-0.04822	0.04303	0.0087	0	2
-0.04798	0.00392
-0.0477	0.01122	0.00945	0.00328	4
-0.0476	0.00915	-0.00436	0.00582	4
-0.04756	0.00613	-0.01511	0.00503	4
-0.04752	0.00287	-0.01473	0.00174	4
-0.0472	0.0319	-0.01746	0.01152	2
-0.04718	0.01067	0.00237	0.01017	4
-0.04717	0.01249	-0.03274	0	2
-0.04668	0.01728
-0.04632	0.01848	0.01324	0.00977	4
-0.04627	0.02313	-0.01909	0.01047	4
-0.04624	0.00985	0.00881	0.00197	4
-0.04592	0.02497	-0.00928	0.01528	4
-0.04587	0.00166	-0.02229	0.01156	4
-0.0453	0.0063	-0.02538	0	5
-0.04479	0.01375	-0.01703	0.03148	4
-0.04459	0.01825	-0.01468	0.01165	4
-0.04459	0.01493	-0.03753	0	2
-0.0443	0.00815	-0.01209	0.01057	4
-0.04403	0.00023	-0.01453	0	2
-0.04377	0.0015
-0.04362	0.01546	-0.03727	0.01116	4
-0.04344	0.01895	-0.01824	0.01968	4
-0.04339	0.00344	-0.02228	0.00495	4
-0.04319	0.02135	0.01515	0.0121	4
-0.04317	0.01732
-0.04314	0.00684	-0.02467	0.00549	4
-0.04296	0.00044
-0.04293	0.02071	0.00332	0.0079	4
-0.04266	0
-0.04252	0.0113	-0.00192	0	2
-0.04226	0.01896	-0.03866	0.00328	8
-0.04224	0.01347	-0.0424	0.00084	4
-0.04205	0.01198	-0.03527	0.00214	4
-0.04189	0.00183
-0.04163	0.02631	-0.01982	0.00447	8
-0.04112	0.01208
-0.04089	0.00377	-0.01635	0.0064	8
-0.04088	0.0483	-0.00489	0.01847	4
-0.04064	0.00995	-0.00326	0.00472	4
-0.04062	0.00142	-0.05414	0.00576	4
-0.04039	0.01891	-0.05453	0.00251	4
-0.04034	0.05039
-0.04015	0.02534	0.00051	0.02514	4
-0.04009	0.00886	-0.00768	0.03352	4
-0.03994	0.00136	-0.01967	0.04043	4
-0.03979	0.01126	-0.00673	0.01145	4
-0.03976	0	0.00133	0.01902	4
-0.03935	0.00722	0.00419	0.01037	8
-0.0393	0.01519
-0.03917	0.01129	-0.02235	0.01532	4
-0.03911	0.01108	-0.00843	0.0274	2
-0.03896	0.00146	-0.01184	0	2
-0.03894	0.01224
-0.03892	0.01297	-0.06363	0	2
-0.03865	0.01056	-0.05018	0.01374	12
-0.03862	0.01127	0.0212	0.0281	4
-0.03854	0.02252	-0.00505	0.03072	2
-0.0383	0.00158	-0.03611	0.0021	4
-0.03826	0.00017
-0.03811	0.01364	-0.0144	0.00752	4
-0.03804	0.01109	-0.04163	0.00526	4
-0.03799	0	0.0026	0.00147	4
-0.03799	0.01341	0.03948	0.01339	4
-0.03797	0.01194	-0.00057	0	2
-0.0379	0.00371	0.00015	0.00084	4
-0.03789	0.02801	-0.01543	0.02056	4
-0.03783	0.01223	-0.01361	0.00296	4
-0.03778	0.0246	-0.00764	0.01789	4
-0.03771	0.00087	-0.01099	0.00698	4
-0.03761	0.00625	0.00334	0.03062	4
-0.03757	0.02264	-0.01708	0.00673	4
-0.03755	0.02349
-0.03755	0.00603
-0.0375	0.01133	-0.0061	0.01063	16
-0.03734	0.02613	0.00306	0.0046	4
-0.03729	0.01244
-0.03719	0.00767	0.0015	0	2
-0.03707	0
-0.03706	0.00776
-0.03701	0.01288	-0.01286	0.02131	4
-0.0369	0.02247	-0.01261	0	2
-0.0369	0.00146	0.0255	0.00289	4
-0.03687	0.00853	0.00585	0.03709	4
-0.03685	0.01966
-0.03683	0.00577
-0.03661	0.00036	-0.03825	0	2
-0.03638	0.00117	0.01529	0.03292	2
-0.03635	0.00076	-0.01213	0.0243	4
-0.03624	0
-0.03613	0.00164	0.0218	0.00405	4
-0.03613	0.03108
-0.03611	0.0267	-0.00753	0.01093	4
-0.03597	0.01323	-0.02113	0.00589	4
-0.03594	0.00482	0.00329	0.02515	4
-0.0359	0.01191	-0.00814	0.01859	4
-0.03578	0.03805	-0.02574	0	2
-0.03572	0.01013	-0.00349	0.01293	4
-0.03533	0.0018	0.00675	0.00448	4
-0.03532	0.00652	-0.02575	0.02112	4
-0.03532	0.02841
-0.03525	0.00616
-0.03523	0.00179
-0.03515	0.01003
-0.03513	0.00996	-0.01224	0.00992	4
-0.0351	0.01691	0.01188	8e-05	4
-0.03505	0.02818	-0.04669	0.01374	4
-0.03499	0.01246
-0.03485	0.00743	-0.00431	0.01773	4
-0.03473	0.00174	-0.01469	0	2
-0.03472	0.02645
-0.03468	0.01143	-0.01854	0	2
-0.0345	0.00407
-0.03447	0.00644	0.01064	0	2
-0.03445	0.00747	-0.02078	0.02232	4
-0.03444	0.02012	-0.01568	0.00433	4
-0.03444	0
-0.03426	0.01313	-0.01677	0.0206	4
-0.03395	0.01445	0.01159	0.00697	4
-0.03389	0.01737	-0.01389	0.04373	4
-0.03379	0.02023	0.01013	0.02043	4
-0.03379	0.01143	-0.01535	0.00859	4
-0.03379	0.00076
-0.03371	0.00102	0.01003	0.02006	4
-0.03369	0.00872	0.01256	0.0172	4
-0.03367	0.00617	-0.00957	0.00581	4
-0.03366	0.01106	-0.00361	0.00952	6
-0.03357	0.01604
-0.0335	0.01647	-0.00489	0.01327	4
-0.03349	0.00147	-0.02581	0	2
-0.03346	0.03772	-0.01389	0.02323	4
-0.03333	0.01747	-0.03038	0.0573	4
-0.03331	0.04765	-0.01792	0	2
-0.03329	0.00563	-0.00618	0	2
-0.03322	0.01146	-0.01632	0.01283	4
-0.03314	0.00875	-0.00083	0.02274	4
-0.03309	0.02265	-0.01127	0.01347	16
-0.03294	0.00825	0.00763	0.0156	2
-0.03282	0.02527	0.02452	0.02655	4
-0.03261	0	-0.01801	0.0118	4
-0.03253	0
-0.03251	0.03001	-0.05726	0.02032	4
-0.03248	0
-0.03245	0	-0.02972	0.03216	4
-0.03236	0.00379
-0.03234	0.002
-0.03233	0.027	-0.03633	0.0055	4
-0.0323	0.03345	0.00274	0.03196	8
-0.03218	0.02633	-0.03399	0.01506	4
-0.03218	0.02164
-0.03213	0.02986	-0.03484	0.01482	4
-0.03204	0.0094	-0.02756	0.0078	4
-0.03202	0.03023	0.01743	0.00837	4
-0.03201	0.01234	0.00556	0.00301	4
-0.03198	0.00169
-0.03192	0.0134	-0.00559	0.01177	4
-0.0319	0.00693	0.01716	0.01739	4
-0.03189	0.00058
-0.03179	0.00881	0.00239	0.00332	4
-0.03166	0.00415
-0.03164	0.00495	-0.04731	0.00369	4
-0.03162	0.02883	0.001	0.01786	4
-0.03158	0.01954	-0.00105	0.00391	4
-0.03155	0.02741	-0.00705	0.00611	4
-0.03155	0.00602	-0.01357	0.00175	4
-0.03154	0.05105	-0.02716	0.00858	4
-0.03153		0.00851	0.03888	2
-0.03144	0.01318	-0.02352	0.05652	4
-0.03142	0.01173	0.01763	0.01617	4
-0.03142	0.0083
-0.0314	0.00436	-0.01352	0.01978	4
-0.03133	0.01381	-0.01462	0.00356	4
-0.03131	0.00937
-0.03126	0.01345	0.0038	0.00175	4
-0.03125	0.01123	-0.01507	0.00346	4
-0.03122	0.00477	-0.00865	0.02738	16
-0.03101	0.01282
-0.03091	0.00633
-0.0309	0.02867	-0.02493	0.00801	4
-0.0308	0.03487	2e-05	0.01806	4
-0.03074	0.00257	0.01855	0.02858	4
-0.0307	0.00951	-0.00153	0.01101	4
-0.03063	0.01051	-0.03851	0	2
-0.0305	0.02778	0.01629	0.01224	8
-0.03049	0.00711
-0.03047	0.00177	-0.00592	0.01245	4
-0.0304	0.02869	-0.01125	0.0208	4
-0.03033	0.00689
-0.0303	0.01702	-0.01962	0.02669	4
-0.03023	0.03108	-0.00325	0.01333	4
-0.03019	0.01687
-0.03017	0.01164	0.00487	0.01007	4
-0.03016	0.0072	0.01992	0.00598	2
-0.03015	0.00327	-0.02019	0.01204	4
-0.03013	0.01009	-0.02023	0.00237	4
-0.03012	0.02585	-0.00073	0.01593	4
-0.02996	0.03057
-0.02995	0.01165
-0.02992	0.00561
-0.0299	0.02455	-0.00972	0.00568	8
-0.02989	0.00502
-0.02988	0.00803	-0.0176	0.00437	4
-0.02987	0.02556
-0.02979	0.01215	-0.03904	0.01865	4
-0.02971	0.01227
-0.02967	0.02066	-0.02034	0.03194	16
-0.02964	0.00956	-0.01973	0	2
-0.02958	0.01615	0.01438	0.0205	4
-0.02953	0.00096
-0.02952	0.01002	-0.01603	0.00268	4
-0.02947	0.01459
-0.02943	0.00135	-0.01822	0	2
-0.02942	0.00678
-0.02933	0.02039
-0.02927	0.01609	-0.03276	0.00988	4
-0.02926	0.01835
-0.02923	0.02453	-0.0206	0.02288	12
-0.02915	0.00144	0.02438	0.02166	4
-0.02915	0.03148
-0.02909	0.0033	-0.00045	0.0248	4
-0.02909	0.00469	-0.03445	0.025	4
-0.02907	0.00137	0.00379	0.00807	4
-0.02906	0	-0.01758	0.00291	8
-0.02891	0.00913	-0.05179	0.00995	8
-0.02888	0.00575
-0.02876	0.00921	-0.01543	0.00931	4
-0.02876	0.00152	0.00682	0	2
-0.0287	0.00952
-0.02867	0.0044	-0.01986	0.00929	2
-0.02865	0.04272	-0.00709	0.00897	4
-0.02857	0.03322	0.02873	0	2
-0.0285	0.01454
-0.02849	0.00695	-0.03237	0.00678	4
-0.02849	0.00923	-0.01466	0.00881	4
-0.02847	0.01962	-0.00718	0.00125	4
-0.02841	0.01722
-0.02841	0.00221	0.03443	0.0054	4
-0.02838	0.00123	-0.01099	0.00355	4
-0.0283	0.00467
-0.02829	0.02008
-0.02828	0.01439	0.01589	0.02526	4
-0.02812	0.0127
-0.02801	0.01136
-0.02801	0.00917
-0.02799	0.0031
-0.02798	0.05515	-0.02683	0	2
-0.02786	0.02375	-0.0073	0.00734	2
-0.02783	0.01427	-0.00801	0.02877	4
-0.02783	0.02402	-0.02564	0.02395	4
-0.02783	0.01866	0.02226	0.02346	4
-0.02781	0.00062
-0.02781	0.04882	-0.01749	0.0196	4
-0.0278	0.01202	-0.00507	0.01546	4
-0.02776	0.0085	0.02591	0.01125	4
-0.02775	0.01939	0.00525	0.02347	4
-0.02773	0.00972
-0.02767	0.01958	0.01632	0	2
-0.02764	0.00684	-0.02693	0	2
-0.02757	0.00185	0.00676	0.01456	4
-0.02753	0.00418	0.01789	0.01943	4
-0.02752	0.0113	-0.03731	0.0067	8
-0.02752	0.00299	-0.00324	0	2
-0.0275	0.01518	-0.00611	0.00506	4
-0.0275	0.01404	-0.01128	0.02188	4
-0.02746	0.01115	0.00019	0.01428	16
-0.02735	0.01554	0.0495	0	2
-0.02734	0.03106	0.02264	0	2
-0.02732	0.03749	-0.06859	0	2
-0.02726	0.02026
-0.02724	0.01283	0.00184	0.03223	16
-0.02724	0.01647	0.00316	0.02184	4
-0.02722	0.04388	-0.03634	0.0318	4
-0.02712	0.0164
-0.02707	0.02183	-0.06096	0.00336	4
-0.027	0.02612
-0.02695	0.01451	-0.02392	0.00919	4
-0.02695	0.01819	-0.02393	0.00682	4
-0.02695	0.02967	0.01917	0.01826	8
-0.02688	0.03721	-0.02528	0.01026	4
-0.02688	0.0187	0.00651	0.00698	4
-0.02687	0.00539	0.01323	0.02088	4
-0.02686	0.01917
-0.02685	0.01053
-0.02683	0.01067	0.0131	0.02694	4
-0.02678	0.01671	-0.04298	0.00293	6
-0.02672	0.0181	-0.00673	0.0155	4
-0.0267	0.00517	-0.02166	0.00714	4
-0.02665	0.00735	0.0246	0.00587	4
-0.02664	0.00089	-0.00121	0.01509	4
-0.02662	0.02003	0.01794	0.00281	4
-0.02661	0.00604	0.00413	0.018	16
-0.0266	0.03485
-0.02659	0.02533	0.00675	0.00747	4
-0.02659	0.01541
-0.02658	0.02848	-0.00036	0.00309	4
-0.02656	0.01711	-0.01626	0.00284	4
-0.02653	0.01017	0.02286	0.00389	4
-0.02649	0.02716	-0.00397	0.01851	4
-0.02645	0.00941	0.02316	0.01891	4
-0.02644	0.01442
-0.02642	0.02451	0.00392	0.01284	4
-0.02636	0.02185	-0.01007	0.01174	16
-0.02636	0.02171	-0.028	0.00236	4
-0.02635	0.0226	-0.01621	0	2
-0.02635	0.01715	-0.00808	0.02568	16
-0.02631	0.00285	0.01596	0	2
-0.02628	0.01602	0.01958	0.02829	4
-0.02625	0.00226	0.0086	0.01586	4
-0.02615	0	0.00022	0.03287	4
-0.02614	0.00292
-0.02601	0.01861
-0.02601	0.02092
-0.02592	0.00795	-0.01184	0.01393	4
-0.02589	0.01355	0.02077	0.00543	4
-0.02588	0.03942	-0.01622	0	2
-0.02586	0.02309	0.00778	0.00498	4
-0.02584	0.00556
-0.02577	0.0147	0.01496	0.00251	4
-0.02572	0.01264	0.00456	0.03478	16
-0.0257	0.01137	0.00788	0.03352	6
-0.0257	0.03317
-0.02568	0.01856	0.00278	0.02203	4
-0.02568	0.01282	-0.00788	0.01091	4
-0.02563	0.01715	-0.03225	0.00877	4
-0.02562	0.01195
-0.02562	0.00987
-0.0256	0.00461	-0.00204	0.01817	4
-0.0256	0.01885	0.02456	0.00014	10
-0.02558	0.03707	-0.00545	0.0187	4
-0.02558	0.00028	-0.00257	0.00641	4
-0.02556	0.02714
-0.02553	0.00681
-0.02551	0.01574
-0.02549	0.03678	0.01144	0.02753	4
-0.02549	0.03083
-0.02547	0.0171	0.0176	0	2
-0.02547	0
-0.02546	0.01806	0.00211	0.01462	4
-0.02543	0.01201	0.02136	0	2
-0.02542	0.00086	-0.00018	0.00484	4
-0.0254	0
-0.02539	0.01282	0.03777	0	2
-0.02539	0.03617	0.00413	0.00756	4
-0.02537	0.01665	-0.00168	0.00435	4
-0.02525	0.01196	-0.02553	0.02546	4
-0.02516	0.00744
-0.02515	0.01044
-0.02515	0
-0.02513	0.01877	-0.01056	0.00733	8
-0.0251	0.00134	0.01265	0.02486	4
-0.02508	0.01003
-0.02505	0.0039	-0.01513	0.01324	4
-0.02504	0.0068	-0.01771	0.01505	4
-0.02502	0.00972	-0.00758	0.00054	4
-0.02494	0.01165	-0.01018	0	2
-0.02494	0.006
-0.02492	0.01362
-0.02487	0.00864	0.03	0	2
-0.02485	0.01293	-0.03755	0.00707	4
-0.02483	0.01515
-0.02482	0.00879	0.0016	0.01005	4
-0.02477	0.00381	0.00722	0.00684	4
-0.02472	0.00558
-0.02472	0.03763
-0.02464	0.0001	-0.0291	0.00163	4
-0.02463	0.04102	-0.02821	0.00816	4
-0.02463	0.03547	-0.00988	0.0036	8
-0.0246	0.01432	0.01552	0	2
-0.02457	0.01599
-0.02453	0	-0.0285	0.00121	4
-0.02452	0.01262	-0.03225	0.03589	4
-0.0245	0.01991	0.01021	0.00315	4
-0.02448	0.0162	-0.02885	0.01664	4
-0.02439	0.014
-0.02438	0.00357
-0.02438	0.00565
-0.02433	0.01631	-0.00847	0.0065	4
-0.02433	0.01667
-0.02429	0.02759	-0.00844	0.01467	4
-0.02425	0.00618	-0.00974	0	2
-0.02424	0.01765	-0.01027	0.03365	4
-0.02423	0.01777	-0.00163	0.00927	4
-0.02422	0.00478
-0.02421	0.00133	-0.01042	0	2
-0.0242	0.00327	-0.02243	0.02255	4
-0.02419	0.00385	0.00523	0.01162	4
-0.02416	0.01025
-0.02414	0.02008	0.0009	0.01001	4
-0.02409	0.00384	0.01899	0	2
-0.02404	0.00493	-0.00831	0.03225	4
-0.02403	0.01413
-0.02393	0.01757	0.00127	0.03559	4
-0.02384	0.00258
-0.02383	0.00857	0.00731	0.03173	4
-0.02383	0.00367
-0.0238	0.01083
-0.02377	0.006
-0.02376	0.00124
-0.02372	0.00095
-0.0237	0.0054	-0.02251	0.01393	4
-0.0237	0.00772	-0.05096	0.00147	4
-0.02367	0.0084	-0.00898	0	2
-0.02366	0.02456	0.00637	0	2
-0.02366	0.00076
-0.02365	0.01495	-0.02954	0.02329	4
-0.02361	0.01738	0.00317	0.02203	16
-0.0236	0.01919	-0.00779	0.00828	4
-0.02356	0.01146	-0.00704	0.00317	4
-0.02351	0.0042	0.00198	0.01815	4
-0.02351	0.00566
-0.0234	0.00809	-0.00302	0.00741	4
-0.02339	0.00395	0.00582	0.0071	4
-0.02338	0.01573
-0.02336	0.00394	-0.0262	0.02713	4
-0.02335	0.02725	-0.01247	0.02829	4
-0.02334	0.01507	-0.03233	0.01761	4
-0.02329	0.00761	0.02426	0	2
-0.02327	0.02673	-0.02021	0.02566	18
-0.02327	0.01846	-0.0132	0.00932	4
-0.02325	0.00982	-0.01193	0.00409	4
-0.02325	0.01752
-0.02324	0.00472	-0.01773	0.01204	4
-0.02319	0.00269	-0.05233	0.02128	4
-0.02319	0.00463
-0.02316	0.00814	0.01216	0.02003	4
-0.02306	0.04685
-0.02303	0.02823
-0.02301	0.00753	0.00205	0.0211	16
-0.02298	0.02265	-0.00057	0	2
-0.02293	0.00047
-0.02291	0.01921	0.01408	0.00471	4
-0.02291	0.00889	-0.00551	0.0037	8
-0.02288	0.013
-0.02286	0.01923	-0.00177	0.00353	4
-0.02274	0.02678	-0.01176	0.00116	2
-0.02273	0.01103	0.0039	0.02229	4
-0.02269	0.00704	-0.00393	0.02925	4
-0.02268	0.00386	-0.02542	0.00605	4
-0.02267	0.00912
-0.02265	0.01096	-0.01045	0.00076	4
-0.02264	0.01816	-0.00634	0.0101	4
-0.02257	0.05184	-0.03436	0.01367	2
-0.02256	0.04351	-0.00938	0.01719	16
-0.02256	0.01036	-0.00526	0.00643	4
-0.02255	0.00747	-0.00545	0	2
-0.02255	0.00345	-0.01419	0	2
-0.02249	0.0482	0.01877	0.01781	4
-0.02249	0.00159	-0.00758	0.01343	4
-0.02244	0.02265	-0.01525	0.01508	4
-0.02243	0.00334
-0.02241	0.00789	-0.02124	0	2
-0.02239	0.00258
-0.02238	0.00465	-0.00152	0.0048	4
-0.02233	0.01087
-0.02229	0.02292	-0.01201	0.0091	4
-0.02224	0.00941	0.01177	0.00626	4
-0.02223	0.00255	0.00955	0.01019	4
-0.02222	0.01175	-0.01578	0.00425	4
-0.0222	0.00125	-0.02544	0	2
-0.0222	0.01864
-0.0222	0.02209
-0.02219	0.01928	-0.04352	0.00323	8
-0.02219	0.00758	0.01181	0.00092	4
-0.02218	0.02662	-0.02912	0	2
-0.02215	0.01754
-0.02207	0.00542	-0.00058	0.01798	4
-0.02206	0.00498	0.01618	0.01926	4
-0.02204	0.00207
-0.02202	0.03188	0.00125	0.00699	4
-0.02201	0.00382	-0.01147	0.00964	4
-0.02201	0.01373
-0.02198	0.0061	-0.00096	0	2
-0.02193	0.00455	-0.01222	0.00032	4
-0.02193	0.0155
-0.02193	0.01389	0.007	0.01748	4
-0.02191	0.02952
-0.0219	0.01663	-0.03747	0	2
-0.0219	0.00537	-0.00117	0.00321	4
-0.02189	0.02196
-0.02189	0.02055	-0.02148	0.03582	4
-0.02186	0.00736	0.01658	0.0103	4
-0.02181	0.00021	-0.0211	0.0145	4
-0.02179	0.00407	0.0037	0.00301	4
-0.02176	0.00838	-0.00073	0.0261	4
-0.02176	0.00761
-0.02171	0.02165	-0.05489	0.00372	4
-0.02171	0.01592	-0.00027	0.01182	16
-0.02171	0.01318
-0.02171	0.00848	0.02533	0.01539	4
-0.02169	0.00134	0.00114	0.01264	4
-0.02168	0.00043	-0.00885	0	2
-0.02168	0.00554
-0.02163	0.00481	0.00342	0.00113	4
-0.02162	0.00845	0.01429	0.00643	4
-0.02161	0.0153	-0.02697	0.00752	4
-0.0216	0.02459
-0.0216	0.02393	-0.0118	0.01147	4
-0.0216	0.00612
-0.02156	0.00386	0.02071	0.00739	4
-0.02149	0.01137	-0.02803	0.00342	2
-0.02147	0.02198	-0.00212	0.02116	16
-0.02146	0.00261	-0.02357	0.03103	4
-0.02141	0.00792	0.01088	0.01108	4
-0.0214	0.03219	-0.00265	0.02933	16
-0.02137	0.00092	-7e-05	0	2
-0.02133	0.02582	0.01847	0.01803	4
-0.02132	0.01856	-0.0223	0.0157	4
-0.02132	0.00749
-0.02131	0.02922	-0.00167	0.034	4
-0.0213	0.00741	-0.02192	0.00434	6
-0.0213	0.00903
-0.02129	0.00267	0.00939	0.02438	4
-0.02128	0.0325	0.01268	0	2
-0.02123	0.01	-0.0103	0.05308	4
-0.0212	0.0108	-0.00768	0.00747	4
-0.0212	0.00148
-0.02117	0.01133	-0.00388	0.00775	4
-0.02115	0.02409
-0.0211	0.00129
-0.02104	0.03385	-0.00146	0.04325	4
-0.02102	0.00786	0.00441	0.0086	4
-0.02102	0.02491
-0.02101	0.00997	-0.00733	0.01581	4
-0.02094	0.00627
-0.0209	0.03812	-0.00277	0.01748	4
-0.02089	0.02949	-0.01225	0.02559	4
-0.02088	0.0042	0.01271	0.0096	4
-0.02086	0.00192	-0.00107	0.00952	24
-0.02086	0.0019
-0.02085	0.00876
-0.02084	0.00777	-0.03366	0.03314	4
-0.02083	0.01572	-0.03203	0.01041	4
-0.02082	0.01016
-0.02073	0.03546	0.0101	0.00967	4
-0.02068	0.00663	0.01674	0	2
-0.02067	0.00424	0.01162	0.00011	4
-0.02067	0.02114	-0.00564	0.0164	4
-0.02064	0	0.0045	0.01244	4
-0.02063	0.00519
-0.02063	0.02373	0.00719	0.00383	4
-0.02057	0.00861
-0.02054	0.02023	0.00405	0.00262	4
-0.0205	0.00926	0.02027	0.03176	4
-0.0205	0.0116	-0.00399	0.00715	4
-0.02044	0.00963	-0.04611	0.01375	4
-0.02041	0.00207	0.02095	0.00381	6
-0.0204	0.0122	0.00321	0.00479	4
-0.0204	0.01192
-0.02039	0.02089	-0.014	0.00384	4
-0.02036	0.00431	0.00439	0.01054	4
-0.02036	0.01535	0.00233	0.00611	16
-0.02035	0.00136	-0.00074	0.03752	4
-0.02035	0.01477
-0.02032	0.02032	-0.00551	0.03435	4
-0.02028	0.0062	-0.01022	0.00643	4
-0.02028	0.01641
-0.02027	0.02286	-0.03405	0	2
-0.02025	0.03196	0.00131	0.01906	4
-0.02025	0.01213	-0.02043	0.01472	4
-0.02021	0.003
-0.02014	0.00997	0.00618	0	2
-0.02011	0.01649	0.00716	0.01293	4
-0.02011	0.00534
-0.0201	0.008
-0.02009	0.01438	-0.03091	0.00577	4
-0.02008	0.0214
-0.02008	0.01198
-0.02005	0.01198	-0.00319	0.00662	4
-0.02003	0.00358	-0.00531	0.01188	4
-0.02001	0.00176
-0.02	0.01199	0.00952	0	2
-0.01999	0.01378	-0.01636	0.01812	4
-0.01995	0.00088
-0.01993	0.01273	0.00148	0.02384	4
-0.01992	0.01687
-0.01991	0.01385
-0.0199	0.02119
-0.0199	0.00804
-0.01987	0.00152
-0.01984	0.00396	-0.04096	0	2
-0.01982	0.03362	-0.00583	0.02737	4
-0.01979	0.02292	-0.00073	0.01009	16
-0.01979	0.00056
-0.01975	0.01538	0.02016	0	2
-0.01975	0.01231	0.013	0.01037	4
-0.01975	0.02368
-0.01975	0.01483
-0.01974	0.01236
-0.01972	0.01655	-0.0081	0	2
-0.01971	0.03109	-0.01047	0.00167	4
-0.01969	0.00766	-0.02767	0	2
-0.01967	0.02416	-0.00195	0.00514	4
-0.01965	0.00164
-0.01959	0.01161	-0.04078	0.01126	4
-0.01959	0.0275	-0.04648	0.00863	4
-0.01955	0.00593	0.00167	0.0469	2
-0.01954	0.01879	0.00472	0.00573	4
-0.01954	0.01209	0.00865	0.01478	4
-0.01952	0.00667	-0.00301	0.03255	16
-0.01952	0.00853	0.01747	0.00264	4
-0.01952	0.00715
-0.01952	0.00806
-0.01947	0.02954	-0.01011	0.00578	4
-0.01947	0.02268	-0.02188	0.00741	4
-0.01947	0	0.0156	0.02385	4
-0.01947	0.00622
-0.01946	0	-0.00923	0.00486	4
-0.01946	0.01008
-0.01946	0.01043
-0.01945	0.02301	0.00611	0.00201	4
-0.0194	0.0161	0.02011	0.03148	4
-0.01937	0.01028	0.02506	0	2
-0.01936	0.03398	-0.00687	0.0146	4
-0.01935	0.00332	-0.02307	0	2
-0.01934	0.00041	-0.02612	0.01469	4
-0.01933	0.00561
-0.01932	0.01858	-0.00097	0.02129	16
-0.01931	0.02865
-0.01929	0.00792	-0.03545	0.02418	4
-0.01928	0.01342	-0.0031	0	2
-0.01927	0.01941	-0.01847	0.02957	16
-0.01927	0.03483	-0.01241	0.00731	6
-0.01926	0.00808	-0.01415	0.01334	4
-0.01925	0.0066	-0.00046	0.01669	8
-0.01925	0.0405
-0.01923	0.00098
-0.01918	0.00273	0.00963	0.00524	4
-0.01916	0.00739	-0.0138	0.00699	4
-0.01916	0.00442
-0.01913	0.00113	0.00628	0.01135	4
-0.0191	0.00683	-0.03164	0	2
-0.01907	0.021	0.00035	0.00063	6
-0.01906	0.00197	0.03033	0	2
-0.01905	0.00768	0.00344	0.01115	4
-0.01903	0.0295	0.02162	0.00161	4
-0.01903	0.00186	0.05172	0	2
-0.01903	0.00885	-0.01477	0.04155	2
-0.01899	0.00419	-0.00875	0.03004	4
-0.01898	0.00108	-0.01885	0.01726	4
-0.01896	0.01101	-0.00797	0	2
-0.01895	0.00304	0.01332	0.00578	4
-0.01892	0.02325	-0.04568	0.01912	4
-0.0189	0.00125	-0.01901	0.01305	4
-0.0189	0.00792	-0.01618	0.01353	4
-0.01888	0.02415
-0.01887	0.00907
-0.01887	0.00752	-0.03441	0.01276	2
-0.01886	0.03315
-0.01885	0.01635	-0.0162	0	2
-0.01883	0.00758	0.02394	0.00823	4
-0.01882	0.00692	0.01517	0.01047	6
-0.01882	0.03454	0.00754	0	2
-0.01882	0.00099	0.01422	0.00639	4
-0.01882	0.02321	0.011	0.00822	4
-0.0188	0.00859
-0.01879	0.02409	-0.00964	0.02306	4
-0.01879	0.0127
-0.01876	0.01528	-0.00351	0.01017	4
-0.01876	0.01054
-0.01873	0.0131
-0.0187	0.02419
-0.0187	0.01583	0.01189		1
-0.01869	0.01356	0.00065	0.00324	6
-0.01869	0.01309	-0.01903	0.01877	4
-0.01866	0.00662	-0.01548	0.01729	4
-0.01866	0.03477	-0.02375	0.00213	4
-0.01864	0.02558
-0.01863	0.02736	-0.02137	0.01187	4
-0.01863	0.02166
-0.0186	0.00983	0.01342	0.00498	2
-0.01859	0.0005	-0.0015	0.03563	4
-0.01857	0.00657
-0.01857	0.01685	0.0061	0.00428	4
-0.01853	0.02401
-0.01852	0.03048
-0.01852	0.0323	0.01323	0.009	6
-0.01852	0.01722	-0.01519	0.01797	4
-0.01851	0.02018
-0.0185	0.0001	-0.04276	0.0099	4
-0.01847	0.0011
-0.01842	0.00115	0.0131	0.01756	4
-0.01842	0.00716
-0.01835	0.03719	0.02668	0.05382	4
-0.01835	0.02181
-0.01833	0.02806	0.00091	0.00176	4
-0.01832	0.03407	-0.01349	0.01488	16
-0.01832	0.00698	-0.01581	0.01001	12
-0.01831	0.0113	-0.02495	0.00207	4
-0.01831	0.00281	-0.00886	0.01198	4
-0.01831	0.00835
-0.01829	0.03032	0.0216	0.00037	4
-0.01829	0.00971	-0.02589	0	2
-0.01828	0.01127	-0.01298	0.02012	4
-0.01828	0.02344
-0.01827	0.0032
-0.01827	0
-0.01827	0.01113	-0.00293	0.01091	4
-0.01826	0.0017	0.00209	0.00602	4
-0.01826	0.01136	0.01923	0.01444	4
-0.01825	0.00224
-0.01824	0	-0.00494	0.00221	4
-0.01824	0.02249	0.01075	0	2
-0.01822	0.00756	0.01062	0.03705	4
-0.01821	0.01784
-0.01819	0	-0.01755	0.00331	4
-0.01816	0.03355	0.0016	0.00866	4
-0.01813	0.00401	-0.00483	0.02137	4
-0.01813	0.00508
-0.01808	0.01027	-0.02404	0.01643	4
-0.01808	0.0224	0.00153	0.01276	4
-0.01804	0.0133	0.00437	0.00329	4
-0.01804	0.00801	0.00841	0.00019	4
-0.01804	0.00224
-0.01804	0.0374
-0.01803	0.00617	0.03598	0	2
-0.01802	0.00648	-0.00396	0.01387	6
-0.01801	0.00866
-0.01799	0.00712	0.00305	0.00151	4
-0.01797	0.00312
-0.01795	0.01937	0.00035	0.00204	8
-0.01793	0.00317	-0.0084	0	2
-0.01792	0.01803	-0.00645	0.01051	4
-0.01792	0.00157	0.00414	0.01066	4
-0.01791	0.00822	-0.00467	0.00844	4
-0.0179	0.02333	-0.00583	0.00224	4
-0.01789	0.00174
-0.01788	0.01436	0.02697	0	2
-0.01788	0.02567	-0.00297	0.01143	12
-0.01788	0.01377
-0.01783	0.01433	-0.00877	0.00427	4
-0.01779	0.02753
-0.01777	0.00487	0.0015	0.00972	4
-0.01777	0.00259	0.00834	0	2
-0.01777	0.01529	-0.02104	0.00789	4
-0.01776	0.01048	-0.02181	0	2
-0.01774	0.0365	0.01119	0.00106	4
-0.01773	0.03667	0.00108	0.00618	2
-0.01768	0.00957	-0.00623	0.00492	4
-0.01767	0.03535	-0.0476	0.0176	4
-0.01766	0.01407	-0.02897	0.01781	4
-0.01766	0.0085
-0.01765	0.00514	0.02229	0.00338	4
-0.01765	0.0151
-0.01765	0.00669
-0.01764	0.00971	-0.00354	0.01293	4
-0.01764	0.00709	8e-05	0.00097	4
-0.01762	0.00201	-0.0051	0.01286	4
-0.01762	0.01599	-0.00427	0.01172	4
-0.01762	0.00866
-0.01761	0.01939	0.00318	0.02438	4
-0.0176	0.00736	0.02374	0.00679	4
-0.01758	0.01024	-0.01267	0.01886	4
-0.01757	0.02076	-0.01789	0.00708	4
-0.01757	0.00091
-0.01755	0.00598
-0.01753	0.01062
-0.0175	0.00435	0.00081	0	2
-0.01749	0.02376	-0.00596	0.01003	16
-0.01748	0.01347
-0.01746	0.01813	0.01503	0.03049	4
-0.01746	0.00508	-0.01486	0.02676	4
-0.01746	0.01962
-0.01745	0.00328	-0.01851	0.01713	4
-0.01744	0.01832	-0.00646	0.02025	4
-0.01739	0.04214
-0.01737	0.02044	-0.0013	0.00267	4
-0.01737	0.01347	0.03614	0.00642	4
-0.01729	0.02626	-0.02824	0.00672	4
-0.01728	0.0135	-0.0055	0.00728	4
-0.01728	0.0017
-0.01728	0.01011
-0.01726	0	-0.01108	0.01184	4
-0.01724	0.00202	0.04003	0.01067	4
-0.01722	0.01252	-0.00881	0.00489	4
-0.01721	0.00993	0.0092	0	2
-0.01719	1e-05	-0.0069	0.01556	4
-0.01718	0.01097	0.02017	0.00484	4
-0.01715	0.00306	-0.028	0.00461	4
-0.01713	0.03992	-0.00972	0.00382	4
-0.01711	0.00807	-0.03114	0.01724	4
-0.0171	0.01401
-0.01707	0.00265	-0.00962	0.00711	6
-0.01706	0.00258	-0.00941	0.01487	4
-0.01706	0.02775	0.00143	0.00967	4
-0.01705	0.00935
-0.01704	0.00808
-0.01702	0.01225	0.00374	0.01088	12
-0.01702	0.00342	0.00507	0.0108	4
-0.01702	0.01908
-0.01701	0.02366	-0.02176	0.02273	4
-0.01693	0.01494	-0.00136	0.00676	4
-0.0169	0.00394	-0.01088	0.01543	6
-0.01689	0.00219	0.01763	0.01801	4
-0.01689	0.00721
-0.01688	0.00509
-0.01688	0.00297	0.01004	6e-05	4
-0.01685	0.01644
-0.01682	0.01358	-0.01195	0.00313	4
-0.01681	0.03251	0.01414	0.01619	4
-0.0168	0.00525	-0.02542	0	2
-0.01679	0.0065	0.02023	0.02457	4
-0.01678	0.04291	-0.00577	0.03307	4
-0.01678	0.02688
-0.01675	0.02932	0.00572	0.01706	16
-0.01675	0.02164	0.01584	0	2
-0.01673	0.00184	-0.00997	0.01956	6
-0.01673	0.00981	-0.00064	0.02561	4
-0.01673	0.00323
-0.01668	0.00896
-0.01667	0.00613
-0.01666	0.0131
-0.01664	0.00975	0.01756	0.00776	6
-0.01664	0.00648
-0.01658	0.0008	0.00388	0.00992	4
-0.01658	0.01969	0.00107	0.02369	4
-0.01658	0.02516	-0.0225	0.02659	4
-0.01655	0.00562	0.00675	0.00537	4
-0.01652	0.0066	-0.00289	0	2
-0.01652	0.03106
-0.01651	0.0325	0.02507	0.01259	4
-0.01651	0.01346
-0.0165	0.02068	0.00636	0.01457	4
-0.01649	0.00021	0.02835	0.00167	4
-0.01648	0.01646	-0.00159	0.01242	4
-0.01644	0.01642	-0.01726	0.00996	16
-0.0164	0.00178
-0.01639	0.01358	-0.00129	0	2
-0.01639	0.00066	0.00257	0.01869	4
-0.01638	0.00539	-0.01111	0	2
-0.01636	0.0196	-0.00374	0.01032	4
-0.01635	0.01366	0.02328	0	2
-0.01633	0.03032	-0.00789	0.00292	4
-0.0163	0.01269	-0.0042	0.00636	4
-0.01629	0.00519	0.00458	0.01095	4
-0.01629	0.01673
-0.01628	0.01034	-0.00511	0.01133	6
-0.01628	0.0161
-0.01625	0.02214	-0.01475	0	2
-0.01625	0.00479	-0.00775	0.00378	4
-0.01624	0.00757	-0.00305	0.0284	4
-0.01622	0.00893	-0.01371	0.02466	4
-0.0162	0	0.04682	0	2
-0.0162	0.01663	-0.0713	0	2
-0.01619	0.03622	-0.01059	0.01953	20
-0.01619	0.00116
-0.01618	0.00076	-0.01601	0.04507	4
-0.01616	0.0304	-0.04108	0.02417	16
-0.01616	0.01989	0.05802	0.00188	4
-0.01613	0.00241	0.02039	0.01362	4
-0.01612	0.02521
-0.01606	0.0088	-0.00765	0.01161	4
-0.01606	0.02218
-0.01605	0.01173
-0.01604	0.03155	-0.02703	0.01199	4
-0.01604	0.00733	0.00646	0.0221	4
-0.01603	0.00349	0.02421	0.00645	4
-0.01603	0.0144	0.00884	0.01292	4
-0.01603	0.02128	0.03175	0.02022	4
-0.01603	0.00172
-0.01603	0.03666	-0.01694	0.01059	4
-0.016	0.01135	0.02495	0	2
-0.01599	0.01341	-0.00593	0.00764	4
-0.01598	0.00316
-0.01597	0.03887	0.00379	0.0377	4
-0.01597	0.00472	0.03787	0	2
-0.01595	0.01725	0.01153	0.01611	4
-0.01593	0.01956	0.01836	0	2
-0.01593	0.01253
-0.01591	0.00105	0.01422	0.03733	4
-0.0159	0.03172	0.0057	0.01646	4
-0.01587	0.04039	-0.01227	0.00926	4
-0.01586	0.00203	-0.00704	0.01161	4
-0.01583	0.00438
-0.01582	0.0202
-0.0158	0.00925	0.00126	0.00197	4
-0.01577	0.00637
-0.01573	0.02887	0.00473	0.00991	4
-0.01573	0.0065	0.00693	0.00698	4
-0.01572	0.00689
-0.01571	0.01233	0.02288	0	2
-0.0157	0.03119	0.03374		1
-0.01569	0.03415
-0.01568	0.00301
-0.01565	0.02399	-0.01459	0.00315	4
-0.01565	0.01186	-0.01972	0.02539	4
-0.01565	0.00926	0.00655	0.02356	4
-0.01563	0.01821	0.03339	0.00467	4
-0.01563	0.00105	-0.01835	0.0253	4
-0.01562	0.01291	-0.00103	0.0166	6
-0.01562	0.01748	0.00225	0.00794	4
-0.01561	0.02405	0.00783	0.01801	4
-0.0156	0.02309	0.03596	0	3
-0.01559	0.00894	0.00044	0.01767	4
-0.01557	0.01796
-0.01553	0.024	-0.02282	0.0349	4
-0.01552	0.00034
-0.01551	0.021	0.01393	0.01379	8
-0.01547	0.02625	-0.009	0.02422	4
-0.01545	0.00235	-0.00681	0.01033	4
-0.01544	0.00837	-0.01992	0.01376	4
-0.01544	0.01097
-0.01543	0.02165	0.00942	0.01303	4
-0.01543	0.00216	0.00283	0.00926	4
-0.01538	0.00609	-0.00928	0	2
-0.01536	0.00183
-0.01532	0.03985	0.0084	0.00585	4
-0.01532	0.01044	0.02066	0.01559	4
-0.01531	0.00269	0.01594	0.02994	4
-0.01531	0.03716	-0.00171	0.01524	4
-0.01529	0.00311
-0.01527	0.00259	0.02827	0.01198	4
-0.01524	0.02073
-0.01523	0.01177	0.00161	0.00059	4
-0.01521	0.005	0.00676	0.00183	4
-0.01521	0.01167
-0.0152	0.00818	-0.03009	0.00032	4
-0.01517	0.01577	0.00807	0.00471	4
-0.01516	0.01066	0.02025	0.05156	4
-0.01515	0.00743	0.01273	0	2
-0.01513	0.01627	0.01776	0.00337	4
-0.01512	0.04939	0.00798	0.00486	4
-0.01511	1e-05	0.00791	0.00616	4
-0.0151	0.00494	-0.01024	0.02765	2
-0.01509	0.02194	-0.01694	0.02558	4
-0.01508	0.01594
-0.01507	0.01542
-0.01504	0.01085	0.00344	0.02491	4
-0.01504	0.01222	0.00123	0.00229	4
-0.015	0.01518	-0.01344	0.00044	4
-0.015	0.00835	0.03201	0.00461	4
-0.01499	0.02316	0.01486	0.01252	4
-0.01498	0.00354	0.02051	0.02521	4
-0.01498	0.00524
-0.01496	0.00552
-0.01493	0.02123	-0.00149	0.00196	4
-0.01492	0.00413	0.00172	0.00543	4
-0.01487	0.02686	-0.00209	0.02044	4
-0.01485	0.03008	-0.00694	0.01809	16
-0.01485	0.00705
-0.01482	0.00989
-0.01479	0.00326
-0.01476	0.01653	-0.02252	0.02135	8
-0.01474	0.00759
-0.01473	0.01032
-0.01472	0.00143
-0.01471	0.04399	0.00627	0.00199	4
-0.01469	0.04649	0.01926	0.01332	4
-0.01467	0.02308	0.00269	0.02057	4
-0.01467	0.01847	-0.00553	0.03129	8
-0.01462	0.00458
-0.01458	0.0014	0.00335	0.02215	4
-0.01456	0.01789
-0.01455	0.01859	-0.00141	0.01613	6
-0.01454	0.00567	0.00303	0.01036	4
-0.01453	0.04504
-0.01452	0.00814	-0.0153	0.00454	4
-0.01451	0.00323
-0.01451	0.00358	0.00063	0.0017	6
-0.01443	0.00607
-0.01442	0.00308	-0.01173	0.00026	4
-0.01439	0.01926	0.01033	0.00495	4
-0.01437	0.03215	-0.00446	0.0038	4
-0.01433	0.02906	-0.01403	0.01588	16
-0.01433	0.01632	0.02744	0.00524	4
-0.01433	0.02341
-0.01432	0.02056	0.01422	0.00112	4
-0.01431	0.0158	-0.01415	0.0317	4
-0.01429	0.00779	-0.00204	0.00279	4
-0.01428	0.00045
-0.01428	0.02425	0.00676	0.01672	10
-0.01428	0.01552	-0.0186	0.00643	4
-0.0142	0.00699	-0.01482	0.02123	4
-0.01418	0.0195	0.00152	0.01721	16
-0.01418	0.00303
-0.01417	0.02151	-0.00722	0.01368	12
-0.01417	0.00838
-0.01417	0.01506
-0.01417	0.00458	0.02825	0.01861	4
-0.01416	0.00485	-0.03328	0.004	8
-0.01414	0.01295	0.01404	0.01471	4
-0.01413	0.0042
-0.01412	0.03336	-0.01155	0.00159	4
-0.01412	0.00672
-0.01411	0.0046	0.0482	0.00478	4
-0.01411	0.00459	-0.01064	0.0083	4
-0.0141	0.02795	-0.0004	0.00518	16
-0.01409	0.00506	-0.02781	0.01592	6
-0.01409	0.01619
-0.01407	0.0203	-0.01512	0.00043	4
-0.01407	0.00968	0.01674	0.00095	4
-0.01403	0.01591	-0.01258	0.00249	4
-0.01403	0.01505
-0.01401	0.01909	-0.02437	0.00059	4
-0.01399	0.00538	-0.00724	0.00025	4
-0.01396	0.00425
-0.01395	0.01285
-0.01388	0.00022	-0.01104	0.01208	4
-0.01384	0.00037	-0.01884	0.00854	4
-0.01383	0.00705
-0.0138	0.01158	-0.0116	0.00493	4
-0.01377	0.01316	-0.02008	0.00328	4
-0.01376	0.02085
-0.01375	0.01193	-0.00404	0.01682	12
-0.01374	0.00424	-0.0089	0.00671	4
-0.01371	0.01406	-0.06803	0.01598	4
-0.01371	0.00026	-0.00232	0.00379	4
-0.01371	0.014
-0.0137	0.01509	0.01729	0.01229	4
-0.01367	0.01859	0.00657	0.00858	4
-0.01364	0.01272	-0.01816	0.02395	4
-0.01363	0.04016
-0.0136	0.00758	0.02658	0.00663	6
-0.01359	0.00126
-0.01355	0.00857	0.00486	0.02056	4
-0.01354	0.00661
-0.01353	0.02785	-0.01854	0.04378	4
-0.01351	0.00557
-0.01348	0.01198	0.00347	0.00815	20
-0.01348	0.00015	0.00714	0.03506	4
-0.01346	0.02063	0.00346	0.03346	2
-0.01345	0.01638	0.01827	0.00726	4
-0.01344	0.02951	-0.0087	0.01748	16
-0.01344	0.00539	-0.01076	0.02032	4
-0.01344	0.01724	-0.0387	0.00947	4
-0.01344	0.01028	-0.00913	0.00102	4
-0.01343	0.01158	-0.01404	0.00304	6
-0.01341	0.00602	0.00032	0.01533	4
-0.01341	0.02547	0.02169	0.01808	4
-0.0134	0.02456	-0.00505	0	2
-0.01338	0.02301	-0.00184	0	2
-0.01336	0.00654
-0.01335	0.01014	0.0174	0	2
-0.01335	0.00508	-0.0036	0.00672	4
-0.01333	0.01062	-0.00221	0.01332	4
-0.01333	0.006	0.02352	0	2
-0.01333	0.00212
-0.01332	0.00033	0.00074	0.01476	4
-0.01332	0.00905	-0.0037	0.00752	12
-0.01332	0.00298	0.01617	0.01408	4
-0.0133	0.01033
-0.01328	0.00956	0.03848	0.00933	4
-0.01327	0.00465
-0.01326	0.00754	-0.02296	0	2
-0.01326	0.00099
-0.01325	0.0087	-0.02863	0.00909	4
-0.01322	0.037	0.00308	0	2
-0.01322	0.01495	-0.00373	0.0201	4
-0.01321	0.00658	-0.03969	0.00017	4
-0.01318	0.02276	0.00046	0.00271	15
-0.01318	0.01224	0.01644	0.02126	4
-0.01316	0.00428	-0.00816	0.01128	4
-0.01315	0.01065	-0.01117	0.03412	2
-0.01314	0.00134	0.00151	0.0015	4
-0.01314	0.00017	-0.00663	0.02569	4
-0.01312	0.00162
-0.0131	0.00708
-0.0131	0.01037
-0.01308	0.03375	0.02347	0.0058	4
-0.01307	0.02838	-0.01127	0.01328	16
-0.01307	0.02967	0.00374	0.01612	4
-0.01307	0.0054	0.02567	0.02245	4
-0.01304	0.00049	0.00926	0.0203	4
-0.01302	0.0045	0.00712	0.01462	4
-0.01301	0.02716	0.05031	0	2
-0.013	0.02088	0.01008	0.01978	30
-0.01298	0.0017	0.03247	0.00205	4
-0.01297	0.03504
-0.01294	0.00114	-0.01007	0.00056	4
-0.01294	0.00914	0.00283	0.00041	4
-0.01292	0.00613	0.0072	0.00296	4
-0.01292	0.02072
-0.01292	0.00438	-0.00225	0.02238	4
-0.01291	0.02458
-0.01288	0.03355	0.00275	0.04016	4
-0.01282	0.00978
-0.01281	0.00694
-0.0128	0.00089
-0.01278	0.0137	-0.01186	0.01389	4
-0.01275	0.00409
-0.01274	0.00594	-0.03925	0	2
-0.01273	0.00814	-0.01145	0.00425	4
-0.01272	0.0338	0.01061	0.00394	4
-0.01272	0.01416	-0.00667	0.00767	4
-0.01269	0.0053	0.00451	0	2
-0.01268	0.02351	0.00895	0.02116	4
-0.01268	0.00623	0.01673	0.00663	4
-0.01268	0.01587
-0.01266	0.0068	0.0157	0.00314	4
-0.01264	0.02074	0.0282	0.01981	4
-0.01262	0.03177	0.00285	0	2
-0.01262	0.02956	0.00035	0.0193	6
-0.01262	0.00128
-0.01261	0.01677	-0.00743	0.02494	4
-0.0126	0.01159	-0.01628	0	2
-0.01256	0.02693
-0.01256	0.02505
-0.01254	0
-0.01252	0.02621	0.00724	0.01156	20
-0.01251	0.01154	0.00778	0	2
-0.0125	0.0108	-0.0119	0.00786	4
-0.01244	0.0292	-0.01702	0	2
-0.01243	0.02086	0.00096	0.03344	4
-0.01243	0.01843
-0.01243	0.01142	0.00487	0.00419	4
-0.01241	0.01587
-0.0124	0.00042	-0.03365	0.00645	4
-0.0124	0.01609	-0.00428	0.00558	4
-0.01239	0.00205	-0.03429	0	2
-0.01238	0.02064	-0.0021	0.0002	4
-0.01236	0.0191	0.00588	0	2
-0.01236	0.00918	-0.0222	0	2
-0.01233	0.03168	0.0147	0.00963	4
-0.01233	0.00773	0.00875	0.01486	4
-0.01233	0.01223	-0.01052	0.01608	4
-0.01232	0.0036
-0.01231	0.01669	0.00136	0.01661	4
-0.01231	0.0009	-0.00584	0.01718	4
-0.0123	0.00063	-0.04143	0.01042	4
-0.01229	0.01348	0.00583	0.03192	4
-0.01228	0.00704
-0.01227	0.02217	-0.00297		1
-0.01227	8e-05
-0.01227	0.00917
-0.01225	0.03131	-0.01452	0.00615	4
-0.01224	0.01004
-0.01223	0.00156
-0.01222	0.00332	-0.00727	0.01087	4
-0.0122	0.02227	-0.01226	0.03287	4
-0.0122	0.00047
-0.01218	0.01595	0.0101	0.01411	16
-0.01217	0.00959
-0.01215	0.0236	-0.01173	0	2
-0.01215	0.0158	0.00687	0.0085	4
-0.01213	0.00775	0.00168	0.0253	4
-0.01211	0.02413	0.0015	0.011	4
-0.01211	0.0254	0.02885	0	2
-0.01211	6e-05
-0.0121	0.02502	-0.02726	0.00723	4
-0.0121	0.0097	0.01733	0.03146	4
-0.01209	0.00744	-0.00433	0.01712	16
-0.01209	0.02195	-0.00124	0.01587	42
-0.01209	0.00759
-0.01208	0.03833	0.03698	0.04168	4
-0.01208	0.0067	0.02072	0.0204	4
-0.01208	0.0039	0.04513	0.02266	4
-0.01203	0.01216	0.02305	0.0164	4
-0.01203	0.00633
-0.01201	0.00415	0.0053	0.03481	4
-0.012	0.02941
-0.01199	0.01206
-0.01199	0.01695	-0.00503	0.04023	8
-0.01199	0.01201
-0.01198	0.01411
-0.01197	0.00652
-0.01196	0.00552	-0.00342	0.004	4
-0.01195	0.01046	0.02958	0	2
-0.01193	0.00558	-0.00429	0.00035	4
-0.01193	0.01297
-0.01193	0.02196	-0.01937	0	2
-0.01192	0.01341	-0.00256	0.03237	4
-0.01191	0.03459
-0.01186	0.01807
-0.01185	0.02092	-0.02299	0.01051	4
-0.01184	0.01028	-0.00111	0.01346	4
-0.01181	0.00856
-0.01176	0.00165	-0.00916	0	2
-0.01176	0.01535	-0.01313	0	2
-0.01176	0.00942	0.00306	0.00822	4
-0.01174	0.0163	-0.02165	0.03341	2
-0.01171	0.02792	0.0337	0.01664	4
-0.01171	0.00677
-0.0117	0.01609	0.02611	0.00731	4
-0.0117	0.02057	-0.02082	0.01707	24
-0.01169	0.00611	0.0046	0.00633	4
-0.01167	0.00068	-0.01324	0	2
-0.01167	0.01681
-0.01164	0.00269	-0.02088	0.00062	4
-0.01163	0.01476
-0.01162	0.00594	0.00173	0.0343	2
-0.0116	0.00998
-0.01157	0.01059	0.02182	0.01081	4
-0.01156	0.00462	0.03604	0	2
-0.01151	0.01549	-0.00493	0.00462	4
-0.01148	0.00363
-0.01146	0.0139	0.01532	0.01808	4
-0.01146	0.0137	-0.00393	0.00479	4
-0.01146	0.00993
-0.01146	0.00241
-0.01145	0.03237	-0.02858	0	2
-0.01144	0.00813
-0.01143	0.01554	-0.00208	0.02413	12
-0.01142	0.01922	0.02176	0.00455	4
-0.01142	0.0121	-0.01104	0.00225	4
-0.01142	0.00417
-0.01141	0.00303	0.01809	0.00449	2
-0.01141	0.02036
-0.01139	0.02052
-0.01133	0.01112	0.00091	0	2
-0.01133	0.00394
-0.01133	0.00591
-0.01133	0.00521
-0.0113	0.027	0.00318	0	2
-0.01127	0.00132
-0.01123	0.00798	0.02633	0.00889	4
-0.01122	0.00894
-0.01118	0.00098	-0.01243	0.01075	4
-0.01115	0.0031	-0.01163	0.00187	4
-0.01115	0.00578
-0.01113	0
-0.01109	0.02578	0.01871	0	2
-0.01109	0.00981
-0.01107	0.0065
-0.01107	0.01055	0.01412	0.00851	4
-0.01106	0.00723	0.02127	0.02399	4
-0.01106	0.03	-0.00039	0.0048	4
-0.01102	0.01387	0.01907	0	2
-0.01102	0.00677	-0.00436	0.01798	4
-0.01101	0.02354	-0.01136	0.00371	4
-0.01101	0.01305	-0.01384	0.00076	4
-0.01101	0.01015
-0.011	0.00082	0.00482	0.00205	4
-0.011	0.00755	-0.00893	0.01378	4
-0.011	0.01411
-0.01098	0.00236	0.01424	0.01054	4
-0.01098	0.03226
-0.01097	0.00257
-0.01095	0.0456	0.01139	0.01057	4
-0.01094	0.00606
-0.01092	0.01015	0.0166	0.03836	4
-0.01092	0.00085
-0.01091	0.0184	0.01453	0	2
-0.01087	0.02031
-0.01086	0.00934	0.02956	0.00016	4
-0.01085	0.00088	-0.0245	0.0041	4
-0.01085	0.00087	-0.02319	0.01798	4
-0.01085	0.01177
-0.01082	0.03125
-0.01081	0.0114	-0.00148	0.01542	4
-0.01081	0.04152	0.00169	0.00164	4
-0.01081	0.02057	-0.02839	0.01742	4
-0.01077	0.02104
-0.01073	7e-05
-0.01072	0.00329	0.00041	0.02724	16
-0.01072	0.01174
-0.01071	0.01408
-0.0107	0.00573	-0.017	0.00981	4
-0.0107	0.00056
-0.01068	0.01047	-0.01338	0	2
-0.01067	0.01819	-0.033	0.01871	4
-0.01066	0.00519	-0.01534	0.03828	4
-0.01066	0.00961
-0.01065	0.0151	-0.02653	0	2
-0.01065	0.00867	-0.02256	0.00754	4
-0.01064	0.01636
-0.01063	0.00231	0.02962	0.01281	4
-0.01062	0.02252	-0.01184	0.01414	4
-0.01062	0.01186	0.00361	0.00818	4
-0.0106	0.00203	-0.00943	0.00645	16
-0.01059	0.00554
-0.01058	0.00521	-0.00514	0.02411	4
-0.01057	0.01501
-0.01055	0.00323
-0.01052	0.01345	-0.00048	0	2
-0.0105	0.01208	0.00822	0.01498	4
-0.01047	0.00136
-0.01046	0.01322	0.00265	0.02873	8
-0.01046	0.00727	-0.01343	0.01631	4
-0.01045	0.0258	-0.01128	0.04291	4
-0.01044	0.00431	0.01645	0	2
-0.01043	0.01068	0.0121	0.0201	4
-0.01043	0.00832	0.02205	0.01512	6
-0.01042	0.0165	-0.00471	0	2
-0.01042	0.02614
-0.01041	0.01681
-0.0104	0.00686	-0.03497	0.0093	4
-0.01039	0.01806	0.02877	0.00397	4
-0.01036	0.00431
-0.01035	0.01722	0.00192	0.0232	4
-0.01034	0.02837
-0.01033	0.00712
-0.01033	0.03021
-0.01032	0.00787	0.00587	0.0042	4
-0.01029	0.01162	0.01109	0.00469	4
-0.01029	0.02897
-0.01029	0.01086	0.00805	0.00819	4
-0.01028	0.00745
-0.01025	0.01131	0.01786	0	2
-0.01025	0.02747
-0.01025	0.03379	-0.00176	0	2
-0.01024	0.01235	-0.01379	0.0164	4
-0.01022	0.00113	-0.02128	0.00935	4
-0.01022	0.01841	-0.0177	0.02735	8
-0.01021	0
-0.01021	0.00843
-0.01012	0.00917
-0.01012	0.0081
-0.01011	0.00327
-0.01009	0.01055
-0.01007	0.01699
-0.01006	0.02398	-0.01078	0.03113	4
-0.01006	0.00344
-0.01005	0.00662	-0.00371	0.02178	4
-0.01002	0.0376	0.01406	0.00434	4
-0.01002	0.00259
-0.01002	0.00824
-0.01	0.01516
-0.00999	0.00998	-0.00876	0.01941	4
-0.00996	0.01793	0.00272	0.03393	16
-0.00994	0.00081
-0.00993	0.01256
-0.00993	0.02392	-0.01103	0.00559	4
-0.00992	0.01193	0.02073	0.00018	4
-0.00992	0.01191
-0.00991	0.00937	0.01451	0.00345	4
-0.00986	0.0141	-0.00951	0.02913	4
-0.00986	0.00248
-0.00985	0.01872	-0.02582	0.01065	4
-0.00984	0.00522	-0.01197	0	2
-0.00984	0.00483	0.01948	0.01018	4
-0.00981	0.03156
-0.00979	0.00319
-0.00978	0.00412	0.02405	0	2
-0.00978	0.03714	0.02052	0.01066	4
-0.00976	0.02048	-0.00135	0.00563	4
-0.00975	0.0278	0.02356	0.00556	4
-0.00975	0.01006	-0.00504	0.00857	8
-0.00973	0.00173	-0.00618	0.01436	4
-0.0097	0.00412	-0.0048	0.02966	4
-0.00969	0.00174	-0.00762	0.02943	4
-0.00968	0.00314	-0.01077	0.00449	2
-0.00967	0.01813	0.01	0.03316	4
-0.00966	0.00713	0.01277	0.00606	6
-0.00965	0.02797
-0.00961	0.0447	0.01701	0	2
-0.00961	0.03067
-0.00959	0.01289	-0.00052	0.04273	4
-0.00958	0.00013
-0.00958	0.00848
-0.00956	0.01082	0.00053	0.00915	6
-0.00956	0	0.01686	0.00867	4
-0.00956	0.01291
-0.00955	0.00505	0.00803	0.00684	4
-0.00954	0.02149	-0.01032	0.01355	4
-0.00952	0.02446	-0.00559	0.02541	16
-0.00952	0.01785	0.0058	0	2
-0.00952	0.00055
-0.00951	0.00448	-0.00672	0.00814	4
-0.0095	0.01168	-0.01465	0.03541	4
-0.00949	0.0245	0.00721	0.00676	4
-0.00947	0.01169
-0.00947	0.003
-0.00946	0.01052	-0.03244	0.00146	4
-0.00946	0.00707	-0.02643	0	2
-0.00946	0.02688	0.01141	0.02823	4
-0.00946	0.00433	0.00132	0.0112	4
-0.00945	0.01162	-0.01805	0.01544	4
-0.00945	0.03739
-0.00945	0.00072	0.00657	0.00201	4
-0.00944	0.01767	0.01947	0	2
-0.00944	0.01671	0.00959	0.02682	4
-0.00942	0.00567	-0.05677	0	2
-0.00942	0.03883	-0.01019	0.00268	4
-0.00942	0.01368	0.01491	0.01767	8
-0.00941	0.00806	-0.01163	0.0279	4
-0.0094	0.00801	0.00085	0.01049	4
-0.00938	0.02094	-0.00131	0.00889	12
-0.00938	0.00074	-0.0117	0.00582	4
-0.00937	0.00399	0.01207	0.00296	4
-0.00937	0.00492
-0.00936	0.02135	0.0195	0.03017	4
-0.00934	0.00599
-0.0093	0.01497
-0.00927	0.0063
-0.00926	0.0238
-0.00925	0.012	-0.01819	0.03998	8
-0.00925	0	-0.0068	0.00554	4
-0.00923	0.0002	-0.00081	0.00447	4
-0.00922	0.0126	0.01469	0	2
-0.00922	0.01421	-0.00089	0.00323	12
-0.00922	0.00557
-0.00921	0.00041
-0.0092	0.02936
-0.00919	0.02326
-0.00918	0.02966
-0.00917	0.00553	0.0182	0.00237	4
-0.00912	0.00173
-0.00912	0.01525
-0.00911	0.01419	-0.02533	0.00084	4
-0.0091	0.01642	0.00843	0.01909	16
-0.0091	0.01165	-0.0132	0.02014	4
-0.0091	0.00366
-0.00909	0.01874	0.02153	0.00633	4
-0.00908	0.01485	-0.0086	0.00213	4
-0.00908	0.00744
-0.00908	0.00433
-0.00907	0.0276	0.02447	0	2
-0.00906	0.01628	-0.01421	0.00083	6
-0.00906	0.02982
-0.00904	0.02332
-0.00903	0.01847	0.01131	0.01462	4
-0.00903	0.03801	0.00413	0.02982	16
-0.00903	0.00602	0.01246	0.01112	4
-0.00903	0.00563	0.01855	0.01633	20
-0.00902	0.00159	0.00612	0.01261	4
-0.00902	0.00281
-0.00902	0
-0.009	0.00438	0.01045	0	2
-0.009	0.01381	-0.00944	0.00751	4
-0.009	0.005
-0.00899	0.00427	-0.00662	0.00738	4
-0.00897	0.0012
-0.00897	0.03423	0.02757	0	2
-0.00893	0.02183	0.02554	0.00149	4
-0.00892	0.00724	-0.02198	0	2
-0.00892	0.01861	-0.0044	0.02251	6
-0.00891	0.00496
-0.00889	0.02314
-0.00886	0.02367	-0.00761	0.0204	4
-0.00885	0.02927	0.00697	0.01738	4
-0.00885	0.02053	0.01786	0.01312	4
-0.00884	0.02009	0.03002	0.01061	4
-0.00884	0.01487	0.01488	0.02366	4
-0.00881	0.00897	-0.01929	0.02121	2
-0.00881	0.03036
-0.00881	0.01026	-0.01678	0.00874	4
-0.00879	0.01973	-0.02947	0.02453	4
-0.00877	0.00849	0.00267	0.0136	4
-0.00873	0.00346	-0.00066	0.01327	4
-0.00873	0.0162	0.0165	0.01771	4
-0.00871	0.05107	0.00969	0.00605	2
-0.0087	0.03107	0.02949	0	2
-0.00869	0.03009
-0.00868	0.0008	0.01748	0.0144	4
-0.00868	0.01317
-0.00865	0.00218
-0.00862	0.03032	0.01189	0.00735	4
-0.00862	0.00478
-0.0086	0.01931	-0.02934	0.00593	4
-0.0086	0.02726	-0.01248	0.01605	4
-0.00858	0.00036	0.01079	0.0194	4
-0.00858	0.02896
-0.00856	0.00241	0.01093	0.01488	4
-0.00855	0.0259
-0.00854	0.01816	-0.04068	0.00457	4
-0.00854	0.00175	-0.00158	0.02224	4
-0.00854	0.03673	-0.00174	0.03503	4
-0.00853	0.01593	0.01718	0.02183	4
-0.00853	0.00322
-0.00853	0.01911
-0.00851	0.00325	0.00493	0.00346	4
-0.0085	0.00753	0.00849	0.0104	4
-0.00849	0.00803	0.00914	0.00962	8
-0.00848	0.0084	0.02182	0.00228	4
-0.00847	0.00085	0.00418	0.00648	4
-0.00846	0.00112	-0.02733	0.03758	4
-0.00846	0.0269	0.01671	0.02691	4
-0.00844	0.00192	0.01368	0.00183	4
-0.00844	0.00727
-0.00843	0.01569	0.00297	0.02928	12
-0.00842	0.0398	-0.00408	0.01712	16
-0.00839	0.00353
-0.00837	0.04102	-0.01097	0.00173	4
-0.00835	0.02847	-0.01918	0.01469	4
-0.00833	0.02024	-0.00492	0.00755	4
-0.00831	0.00027
-0.00829	0.01195	0.03705	0.01723	4
-0.00826	0.0169	-0.00305	0.02807	4
-0.00826	0.01469
-0.00826	0.00617	-0.02478	0.01143	4
-0.00825	0.00578
-0.00823	0.00108
-0.00822	0.02607	-0.00884	0.00537	4
-0.00821	0.00889
-0.0082	0.01234	0.01063	0.00127	4
-0.00819	0.0324	-0.00317	0.02308	4
-0.00819	0.02224
-0.00819	0.00666
-0.00818	0.02158	0.0187	0.00639	4
-0.00818	0.00381
-0.00818	0.01131
-0.00818	0.01981
-0.00817	0.00923	0.00765	0.01565	4
-0.00817	0.00562	0.02905	0	2
-0.00817	0.00571
-0.00816	0.00801	0.02512	0.01321	4
-0.00816	0.00653	-0.01116	0.02678	4
-0.00816	0.0098	-0.00272	0	2
-0.00815	0.02106	-0.00217	0.00028	4
-0.00815	0.0123
-0.00815	0.01116	0.00861	0.02278	4
-0.00812	0.03726	-0.03862	0.00594	4
-0.00811	0.00622	0.0184	0.02836	4
-0.0081	0.0335	-0.00822	0.01828	36
-0.00809	0.03428	0.00125	0.01984	4
-0.00808	0.00738	0.02712	0.01185	4
-0.00805	0.00114	-0.03263	0.00723	4
-0.00805	0.0163	0.00822	0.00363	4
-0.00803	0.00977	-0.0164	0.00311	4
-0.00801	0.01682	-0.02415	0.0221	4
-0.00801	0.01496
-0.00799	0.00137	-0.03704	0.02735	4
-0.00799	0.0074
-0.00798	0.00417
-0.00796	0.03443
-0.00795	0.02085	-0.0153	0.01918	4
-0.00794	0.00903
-0.00793	0.02177	-0.00789	0	2
-0.00793	0.01987
-0.00792	0.02753	-0.00675	0.02642	16
-0.0079	0.03557	0.01228	0	2
-0.00789	0.01258	-0.02372	0.02289	4
-0.00789	0.01492
-0.00786	0.00328
-0.00783	0.00855	0.01049	0.01824	8
-0.00779	0.01443	-0.00181	0.0007	4
-0.00779	0.00673	-0.01028	0.01843	4
-0.00777	0.01429	-0.00249	0.00555	4
-0.00777	0
-0.00777	0.0052
-0.00776	0.0231	-0.02506	0	2
-0.00776	0.00433	0.0032	0.00473	4
-0.00773	0.00066	-0.03024	0.02476	4
-0.00773	0.01518	0.01048	0.02009	4
-0.00772	0.02505	0.00735	0.01789	6
-0.00771	0.02743
-0.0077	0.0002	-0.01831	0.00028	4
-0.00769	0.01229	0.00729	0.00986	4
-0.00769	0.01406	-0.00047	0.007	4
-0.00768	0.00887	0.01081	0.02559	4
-0.00767	0.01521
-0.00766	0.00437	0.00451	0.00709	4
-0.00766	0.01649
-0.00765	0.01343	0.01148	0.0126	8
-0.00764	0.0141	0.00675	0.01142	4
-0.00763	0.00756	0.03107	0.0239	4
-0.00762	0.01535	0.02452	0	2
-0.00762	0.01796	-0.00361	0.03222	4
-0.00761	0.00482	-0.02142	0.0156	4
-0.0076	0.01209	0.00475	0	2
-0.00755	0.03627	0.0185	0	2
-0.00755	0.00649	-0.00089	0.00924	4
-0.00755	0.03979	-0.00122	0.0002	4
-0.00754	0.01223	0.01304	0.00356	4
-0.00753	0.02097	-0.01154	0.01862	16
-0.00752	0.00183	-0.00312	0.00809	4
-0.00752	0.0289	0.01607	0.01914	30
-0.00752	0.01967	0.02473	0.00867	4
-0.00752	0.01854	-0.00108	0.0047	4
-0.00751	0.02964	-0.0183	0	2
-0.00751	0.04498
-0.00751	0.0107
-0.0075	0.00201	0.02874	0.0035	4
-0.0075	0.04114
-0.00749	0.01468	-0.00974	0.01257	16
-0.00746	0.00968	0.00437	0.01575	4
-0.00745	0.0034
-0.00744	0.00243	-0.01024	0.02591	4
-0.00743	0.00179	-0.01047	0.0046	4
-0.00739	0.01026	0.01103	0.01111	4
-0.00739	0.00461	-0.01504	2e-05	4
-0.00739	0.01577	0.01996	0.00526	4
-0.00737	0.00037	-0.00868	0	2
-0.00737	0.00202	0.0251		1
-0.00734	0.00627	0.00788	0.00024	4
-0.00734	0.01426
-0.00733	0.00257	-0.01286	0.00353	4
-0.0073	0.03313	-0.00035	0.03578	16
-0.00727	0.02425	-0.00426	0.02102	16
-0.00725	0.02178	-0.02355	0.02138	6
-0.00724	0.00575
-0.00723	0.00829
-0.00714	0.01725	-0.01083	0.02171	30
-0.0071	0.00042	0.00343	0.01142	6
-0.0071	0.02633	0.02596	0.01588	4
-0.00709	0.00806
-0.00709	0.0322
-0.00708	0.00028	0.01159	0.00982	4
-0.00708	0.00115
-0.00705	0.02447	0.00552	0.01145	12
-0.00704	0.01592	0.00446	0.01267	12
-0.00703	0.01603	0.00341	0.01633	4
-0.00702	0.0191	0.02248	0.01849	4
-0.00702	0.00136	-0.00554	0.0034	4
-0.007	0.01875	-0.00677	0	2
-0.007	0.00625
-0.007	0.00098	0.03299	0.01172	4
-0.00699	0.01563
-0.00698	0.00201	0.02115	0.04469	8
-0.00697	0.01943	-0.01953	0.01512	4
-0.00695	0.00888	-0.01226	0.0073	4
-0.00695	0.03035
-0.00695	0.00574	0.04247		1
-0.00694	0.04503	-0.00488	0.01547	16
-0.00692	0.0252	-0.01695	0.01519	16
-0.00692	0.01426	-0.0323	0.0308	4
-0.00692	0.00207	-0.01766	0.005	4
-0.00692	0.01378
-0.00691	0.00695
-0.00688	0.00355	-0.00096	0	2
-0.00687	0.02026	0.00159	0.01483	4
-0.00687	0.00354	0.06899	0	2
-0.00683	0.00697
-0.00682	0.00091
-0.00681	0.01343	-0.00032	0.00341	4
-0.0068	0.01056	-0.00607	0.0165	4
-0.0068	0.03649	-0.01273	0	2
-0.00678	0.03352	0.00695	0.02643	4
-0.00676	0.0179	-0.05229	0	2
-0.00675	0.01827
-0.00675	0.01517	-0.00061	0.00249	4
-0.00675	0.00359
-0.00674	0.02199
-0.00672	0.01949	-0.00192	0.01146	24
-0.00672	0.00803	0.00616	0.0103	4
-0.00672	0.00255	0.0258	0.04324	4
-0.00672	0.00647
-0.00671	0.01406	-0.01612	0.01494	4
-0.00666	0.02617	-0.01357	0.01211	4
-0.00666	0.02975	-0.00184	0.03226	8
-0.00666	0
-0.00665	0.00281	0.01552	0.00552	4
-0.00665	0.00701
-0.00665	0.00597
-0.00664	0.00441	-0.01136	0.03344	4
-0.00664	0.0215	0.00927	0.04244	2
-0.00663	0.00267
-0.00661	0.02218	0.02465	0.02263	16
-0.00661	0.0233	-0.0105	0.03071	12
-0.0066	0.01782	-0.01605	0.00281	4
-0.0066	0.02282	-0.01757	0.01518	4
-0.0066	0.01361	0.00309	0.02636	4
-0.0066	0.02123	0.02202	0.00606	4
-0.00659	0.03201	0.04862		1
-0.00657	0.0233	0.00676	0.0232	32
-0.00656	0.02051	-0.0067	0.03931	4
-0.00654	0.01997	0.00246	0.01981	12
-0.00654	0.00241
-0.00653	0.00716
-0.00651	0.02209
-0.00651	0.02065
-0.0065	0.00965	-0.00919	0.00681	4
-0.0065	0.01197	-0.00301	0.0468	4
-0.00649	0.02333	-0.01928	0.00749	12
-0.00648	0.04657	0.02606	0.01602	4
-0.00647	0.01044	0.0175	0	2
-0.00647	0.01716	0.00828	0.01499	4
-0.00645	0.00575
-0.00645	0.00127	0.00886	0.00046	6
-0.00645	0.01803	0.00171	0.01377	4
-0.00644	0.01384	0.02338	0.0209	2
-0.00644	0.00288	0.05227	0	2
-0.00642	0.02258	0.02298	0.02369	4
-0.00642	0.0357	-0.00567	0.04081	4
-0.00642	0.00474
-0.00641	0.01343	0.00765	0.03134	4
-0.00641	0.01586	0.00609	0.01429	4
-0.0064	0.01584	-0.04066	0.03351	4
-0.0064	0.0004	0.00921	0	2
-0.0064	0.02698
-0.0064	0.01617
-0.0064	0.00487
-0.00636	0.00609	0.00078	0.00684	4
-0.00636	0.00942
-0.00635	0.03077	-0.00841	0.00629	4
-0.00631	0.00137	0.02403	0.01574	4
-0.0063	0.00313	0.01658	0.02352	4
-0.00628	0.01853	0.02702	0.00522	4
-0.00628	0.01225
-0.00628	0
-0.00627	0.02036	-0.00409	0.00271	4
-0.00626	0.01089	-0.00748	0.02382	4
-0.00626	0.00728	-0.02321	0.01583	4
-0.00624	0.02013	-0.01725	0.03145	4
-0.00622	0.04382	0.00025	0.00718	4
-0.00621	0.03409
-0.0062	0.03181	0.00591	0.01054	16
-0.00618	0.04433	-0.00044	0.04012	4
-0.00617	0.01665
-0.00615	0.01589	0.00944	0.01898	4
-0.00615	0.01794	0.00076	0	2
-0.00615	0.00466	0.01031	0.00139	4
-0.00612	0.01623	-0.00802	0.02075	16
-0.00612	0.00594	0.0305	0	3
-0.00612	0.01369
-0.00611	0.03767	0.01738	0.01044	4
-0.0061	0.00684
-0.00609	0.02176	-0.01115	0.00158	4
-0.00609	0.00319	0.02303	0.00832	4
-0.00606	0.03575
-0.00605	0.00108
-0.00604	0.02089	0.03097	0.02092	4
-0.00604	0.02303	0.01803	0.03125	4
-0.00603	0.02779	-0.01593	0	5
-0.00602	0.0465	0.00123	0.00472	4
-0.00602	0.00152	-0.02686	0.00196	4
-0.00602	0.01569	-0.0368	0.0236	4
-0.006	0.00171	0.00193	0.00647	4
-0.006	0
-0.00599	0.01464
-0.00595	0.007
-0.00594	0.01982
-0.00592	0.00655	0.03331	0.01349	4
-0.00592	0.01542	-0.01993	0	2
-0.0059	0.00255	-0.00851	0.01032	4
-0.00589	0.00996
-0.00587	0.00253	0.01928	0.0007	4
-0.00587	0.02038	0.01881	0.01032	4
-0.00584	0.00349	-0.01118	0.03045	4
-0.00584	0.00551	0.01277	0.02225	4
-0.00583	0.01371	-0.01101	0.0212	6
-0.00581	0.0054	-0.00897	0.00881	4
-0.00581	0.00383
-0.00579	0.00887	0.00378	0.03211	4
-0.00578	0.02304	0.00432	0.00058	4
-0.00575	0.0087	-0.02743	0	2
-0.00574	0.00425
-0.00574	0.00514	-0.01038	0.00955	4
-0.00573	0.0075
-0.00573	0.00956
-0.00571	0.01176	0.00029	0.0144	18
-0.00571	0.00204
-0.0057	0.02049
-0.00566	0.02091	0.03802	0	2
-0.00566	0.00769	-0.04176	0	3
-0.00566	0.02609	0.00814	0.01567	4
-0.00564	0.00468	-0.01988	0.0194	4
-0.00563	0.00079	0.01016	0.015	4
-0.0056	0.01736
-0.00559	0.02073	-0.01757	0.01035	4
-0.00557	6e-05	0.01141	0.01207	6
-0.00557	0.00685	0.02979	0.00724	4
-0.00556	0.0349	0.00469	0.00188	4
-0.00555	0.03865	-0.01289	0.01169	4
-0.00555	0.00661
-0.00554	0.00032	0.02243	0	2
-0.00554	0.01675	-0.0118	0.02665	4
-0.00553	0.01254	0.01805	0	2
-0.00551	0.02229	-0.00879	0.00935	4
-0.0055	0.00133	-0.00388	0.01258	4
-0.00548	0.00234	-0.0212	0.00027	4
-0.00548	0.01407	-0.00727	0.0339	4
-0.00547	0.00777	0.03588	0.0033	8
-0.00546	0.02989	0.00911	0.00214	4
-0.00546	0.03018	0.02959	0.01812	4
-0.00546	0.02228	-0.00594	0.02717	4
-0.00544	0.02508
-0.00539	0.04198	0.00764	0.02334	4
-0.00538	0.03254
-0.00537	0.00315	-0.01115	0.00495	6
-0.00537	0.01186	0.00093	0	2
-0.00537	0.00499	-0.00537	0.02294	4
-0.00535	0.00269	-0.00288	0	2
-0.00535	0.01247
-0.00533	0.01459	0.00408	0.01148	4
-0.00533	0.02272
-0.00533	0.02016
-0.00533	0.01844
-0.0053	0.00731
-0.00529	0.00269	0.02032	0.00031	4
-0.00529	0.00147
-0.00527	0.01817	-0.00385	0.02107	20
-0.00526	0.01064	-0.01119	0	2
-0.00525	0.00742	-0.01104	0.02975	4
-0.00523	0.00258	0.00863	0.0031	4
-0.00523	0.00989	0.00136	0.01732	4
-0.00523	0.00769
-0.00521	0.01202	0.00579	0.00149	4
-0.00521	0.00783
-0.00519	0.00992
-0.00517	0.00209
[truncated: 3,063 more rows]
